# Supplementary material for: Transcriptomic and Metabolomic Responses in Cotton Plant to Apolygus lucorum Infestation
Source: Insects. 2022 Apr 15;13(4):391. doi: 10.3390/insects13040391 (PMC9025427; doi:10.3390/insects13040391)
Supplement: Supplementary file 1 [file insects-13-00391-s001.zip › Data S.xlsx]

## Sheet: Data S1
Data S1. Primers used for quantitative RT-PCR analysis.
Gene ID	Amplicon size	Sequence (5’ – 3’) forward	Sequence (3’-5') reverse
107950429	186	CGGTGGTGTGAAGAAGCCTCATC	TCCTGGAGAGCTAGAACAGCATGG
107906745	116	GAAGCAACTGACATTCTCGGCAAAG	CGATGGCTGTGAAGTATGGGAACC
107912089	114	ATTCTTCACCGTGCCACTGTTCC	CTCAGCATCTCCGCAAATTCAAACC
107926236	88	AAGGCGGATGTTGTTTGTTGAAAGC	CGTCTCTGTGTAGGAAGTTGGGTTG
107937523	98	AGAACTGGATTGCGATTGCTGTACC	CTGCTCCCACCCTTCAACGAATG
107912592	105	GAGCGGTCCTACTTATGAAGCGAAG	CCATCACAGCAGGATCTACACCAAC
107948772	107	GCATGGTGATAACGGGAGGAAGTC	TACAATCAACGGTGGAGCCAAAGC
107960965	138	GAGCAGCAGTCACAGGTATCAAGAG	GTCCTCGTTGCCATGAGTCGTC
107887399	82	CTGGTATTCTGGAGGCTTGTGGAAG	ATCATGCACCGACCGTCTAACAAC

## Sheet: Data S2
Data S2. Genes detected in all samples. Gene expression levels were shown by FPKMs. All samples harvested at 0, 4, 12 and 24 h following A. lucorum infestation
Gene ID	CK FFPKM	4h	12h	24h	log2(Pest_4H/CK)	ajusted p-value(CK-vs-Pest_4H)	log2(Pest_12H/CK)	ajusted p-value(CK-vs-Pest_12H)	log2(Pest_24H/CK)	ajusted p-value(CK-vs-Pest_24H)
107885927	0	0.02	0	0
107885928	0.0133333	0	0	0.0266667					1.02948	0.169045
107885929	11.6133	15.3367	12.46	10.3933	0.40704	3.97242e-15	0.109658	0.0260394	-0.152478	0.00316788
107885930	6.88	5.61	7.73667	8.33333	-0.30229	0.000779341	0.162229	0.0306489	0.278146	0.000324366
107885931	3.04333	4.12333	4.74	6.17333	0.439587	0.000128203	0.661528	2.17736e-09	1.04776	2.15965e-24
107885932	147.307	60.7833	80.05	46.7167	-1.25193	6.69372e-234	-0.847742	1.82988e-123	-1.63263	0
107885933	40.96	43.3	40.4967	48.18	0.0866165	0.0541399	-0.00689171	0.344266	0.241239	4.38471e-07
107885934	2.28333	3.32667	2.66	1.99	0.556005	1.25023e-05	0.228597	0.0492293	-0.185515	0.0685103
107885935	4.47333	4.05	3.99667	0.926667	-0.131368	0.217043	-0.149928	0.174297	-2.24814	2.67395e-20
107885936	7.63667	9.89	6.97333	7.44667	0.372922	4.84699e-08	-0.131818	0.0426627	-0.0386259	0.180447
107885937	26.2067	25.8467	28.6933	30.4667	-0.0170656	0.336996	0.134632	0.0158426	0.220195	0.000100825
107885939	0.0433333	0.0833333	0	0	1.02758	0.204212
107885941	156.873	126.863	93.8	78.4	-0.32044	4.08435e-57	-0.754767	3.09946e-267	-1.0022	0
107885942	21.0533	15.2	17.56	15.75	-0.460612	3.40427e-18	-0.253291	6.37914e-07	-0.408991	3.56669e-15
107885943	12.5167	10.6733	10.8633	14.03	-0.226141	0.0177411	-0.200034	0.0269617	0.160279	0.0325513
107885944	0.32	0.41	0.133333	0.07	0.341325	0.143009	-1.25663	0.00130171	-2.15814	2.31977e-06
107885945	11.8533	11.0567	11.2833	9.95667	-0.0962694	0.0373549	-0.0672063	0.0922061	-0.253341	5.33381e-07
107885946	5.91667	6.50333	6.63667	6.00333	0.14058	0.0066516	0.17218	0.000874185	0.0236358	0.197633
107885947	2.56333	1.94333	2.14	2.56333	-0.390793	0.0190117	-0.249793	0.0767238	0.00339188	0.273222
107885951	14.2033	15.1733	13.51	12.3567	0.091339	0.0576759	-0.0740716	0.0934556	-0.20402	0.000159663
107885954	123.61	66.5967	63.5367	36.3367	-0.865094	8.68158e-110	-0.928932	2.87035e-123	-1.73775	0
107885955	3.4	3.58333	2.60333	1.01	0.0743244	0.175025	-0.386519	3.54891e-06	-1.74887	9.35948e-62
107885957	3.32	4.45	5.91	5.33667	0.432342	0.00748167	0.844879	5.04888e-08	0.692122	7.28634e-06
107885958	1.94667	1.62667	1.94667	2.28	-0.252265	0.12625	0.00620385	0.367882	0.227079	0.0804152
107885959	1.84	1.98667	0.826667	0.426667	0.0952197	0.279957	-1.16375	5.49708e-07	-2.14331	4.95337e-15
107885960	2.8	2.92	2.89667	2.44	0.0603883	0.19794	0.0481658	0.217044	-0.196205	0.00328931
107885961	4.78	9.03667	8.21	6.58	0.917714	2.45069e-42	0.783169	7.41081e-30	0.465635	1.10124e-10
107885962	10.6133	7.66667	5.6	2.72	-0.471916	3.00384e-23	-0.925619	2.45387e-73	-1.96805	2.46832e-227
107885963	3.77333	4.53333	4.50333	8.18	0.293429	0.0106868	0.287149	0.0105322	1.1	1.74024e-26
107885964	3.45333	3.97333	3.56	2.82	0.198695	0.00245804	0.0326912	0.263979	-0.301275	1.73398e-05
107885965	3.14667	2.85667	3.15	2.52333	-0.133563	0.120591	0.00858122	0.356526	-0.319218	0.00178168
107885966	24.9867	24.0467	30.2367	20.3733	-0.0571521	0.0336246	0.273162	2.61287e-23	-0.297977	5.48828e-23
107885967	0.06	0.0666667	0.106667	0	0.0987424	0.377423	0.74638	0.166643	-3.29244	0.0172072
107885968	4.27667	7.82667	9.28	13.0067	0.865418	6.48268e-17	1.11666	1.13364e-29	1.61785	6.02477e-72
107885971	3.44667	2.86	1.66333	1.44333	-0.276484	0.00991661	-1.0576	9.93e-17	-1.26824	4.48325e-22
107885972	8.34667	10.59	8.21667	7.16333	0.345308	1.71325e-15	-0.0183915	0.281963	-0.219044	2.33033e-06
107885973	8.09	18.3233	30.5167	28.7833	1.1787	6.83861e-69	1.9198	1.23986e-232	1.84169	9.83325e-208
107885974	19.2567	10.4033	14.17	13.75	-0.872234	4.22361e-41	-0.499837	2.92605e-16	-0.567811	2.52281e-20
107885975	0.113333	0.19	0.16	0.133333	0.775362	0.0802304	0.506561	0.162504	0.296026	0.180605
107885976	1.28	0.983333	1.32333	0.536667	-0.369867	0.116735	0.0566701	0.327036	-1.2512	0.000117465
107885977	1.14	1.04	1.42	0.863333	-0.127123	0.235456	0.322824	0.0326858	-0.389831	0.0161883
107885978	3.96333	4.81333	5.8	3.70667	0.282335	0.00272884	0.548813	1.98844e-09	-0.0859742	0.12817
107885979	1.30667	3.74	1.79333	3.79667	1.51723	5.12601e-21	0.465824	0.0103516	1.53296	8.49153e-22
107885980	0.2	0.426667	0.376667	0.633333	1.12074	0.0149116	0.89432	0.0421757	1.64153	9.55178e-05
107885981	12.5133	12.49	9.81667	9.14	-0.001667	0.397119	-0.347419	8.3018e-07	-0.452343	1.96758e-10
107885982	7.34	12.16	18.1467	15.1633	0.726177	1.81007e-38	1.30774	1.53247e-148	1.04442	6.28105e-87
107885983	3.19667	3.50667	4.79333	4.98333	0.0845817	0.272828	0.58112	4.81374e-05	0.612068	1.04263e-05
107885984	0.323333	1.21667	0.83	0.776667	1.92962	6.59937e-21	1.37856	1.09835e-09	1.28846	1.1649e-08
107885986	4.89333	8.36	6.38667	4.38667	0.77505	3.56087e-36	0.389499	3.94182e-09	-0.155327	0.012918
107885987	4.66667	6.19333	6.29667	6.28667	0.425764	1.70398e-09	0.394859	2.27698e-08	0.384941	3.07634e-08
107885988	0.826667	1.18	1.82	1.67667	0.428046	0.01973	1.07053	7.16612e-10	0.771767	1.25582e-05
107885989	5.13	5.82333	5.19333	4.52333	0.182772	0.0679829	0.0207498	0.334699	-0.182717	0.0477911
107885990	80.4733	69.4867	61.29	34.3533	-0.204675	6.25119e-14	-0.38491	3.56253e-43	-1.22118	0
107885991	4.80333	2.54	2.02333	1.44	-0.903777	1.0858e-11	-1.22938	1.66188e-18	-1.72721	6.03595e-30
107885992	4.25333	4.52333	4.06	3.39667	0.0921852	0.145549	-0.0629829	0.205115	-0.324169	0.000140894
107885994	2.36333	2.11333	1.54667	1.79	-0.164896	0.15664	-0.616866	0.000217616	-0.404124	0.00555074
107885997	3.53667	2.82667	2.61667	2.20667	-0.32494	0.00100142	-0.439321	1.35606e-05	-0.692454	4.17736e-11
107885998	4.77	11.3167	4.62667	5.72333	1.24376	1.91297e-59	-0.0549523	0.242531	0.247267	0.00295069
107885999	2.22667	3.08667	2.51333	1.67667	0.477617	1.3992e-12	0.180974	0.00696873	-0.407927	1.04604e-07
107886000	12.6133	10.5367	8.78667	7.85667	-0.261991	0.00013442	-0.522463	3.64653e-13	-0.68788	7.94951e-21
107886002	16.6233	24.3033	17.4733	19.62	0.552117	6.42185e-22	0.0774559	0.107107	0.24104	3.42882e-05
107886003	3.18	4.75333	4.25	3.29667	0.582936	1.30628e-05	0.42156	0.00153507	0.0607764	0.200852
107886006	0.696667	0.573333	0.336667	0.286667	-0.301307	0.0895603	-1.0464	1.01353e-05	-1.27865	1.44588e-07
107886008	10.95	11.11	7.48333	6.80333	0.0208353	0.328391	-0.546212	1.5538e-13	-0.692763	3.9362e-20
107886009	3.89333	4.11667	3.81333	5.29333	0.115265	0.247504	0.00605891	0.367447	0.485484	0.00166166
107886011	0	0.01	0.136667	0.01			4.89903	7.64073e-05
107886012	0.01	0.0133333	0	0	-0.0355099	0.399176
107886013	7.86	7.19333	5.88	6.87667	-0.129707	0.0250092	-0.417513	1.29178e-10	-0.195142	0.000812597
107886014	8.37333	8.43667	8.52667	11.48	0.00982008	0.374231	0.0267526	0.297967	0.453622	8.42477e-10
107886016	3.39667	2.43	2.82667	1.47333	-0.343572	0.00806201	-0.118891	0.165511	-0.989837	2.32081e-11
107886017	4.03667	2.72667	0.516667	0.756667	-0.570937	5.69521e-08	-2.96711	3.34352e-79	-2.42795	3.3663e-64
107886018	0.666667	0.213333	0.66	0.49	-1.62407	0.000655033	0.000162842	0.371411	-0.427634	0.0913621
107886021	0.203333	0.14	0.223333	0.16	-0.54905	0.156873	0.15785	0.295629	-0.311554	0.164702
107886022	73.2533	59.19	71.7	89.9433	-0.304689	9.20263e-19	-0.0270916	0.185755	0.294259	1.3341e-21
107886024	92.04	47.75	70.4667	143.47	-0.932971	7.88791e-154	-0.371257	1.29969e-30	0.635781	1.46054e-122
107886025	2.79	2.46	4.43667	5.33	-0.174013	0.122341	0.677097	2.72145e-08	0.938473	4.77629e-16
107886026	34.3533	27.5833	23.5433	24.9567	-0.320794	3.86816e-09	-0.551142	1.28845e-22	-0.473073	1.08634e-17
107886027	2.38333	1.79	0.933333	1.39	-0.382175	0.0221833	-1.28648	5.81048e-10	-0.641268	0.000261132
107886028	0.596667	1.10667	1.15	0.816667	0.873081	0.000139415	0.944928	2.62375e-05	0.466896	0.0220453
107886031	0.873333	0.85	0.516667	0.303333	-0.0295282	0.348654	-0.750418	3.3727e-07	-1.52589	8.39961e-20
107886032	8.22333	7.72667	7.70667	7.19	-0.0942668	0.0544937	-0.0950877	0.0462166	-0.200488	0.000156568
107886034	2.48667	3.26333	3.2	3.06667	0.399767	0.000860899	0.377047	0.00139236	0.305924	0.00534158
107886035	18.6067	16.26	14.99	8.34333	-0.178759	0.00046892	-0.289797	3.02244e-08	-1.14427	3.7541e-80
107886036	4.66667	5.56333	4.93333	5.35333	0.259514	0.0552569	0.0890728	0.242378	0.199042	0.0669105
107886038	18.2867	15.87	13.7367	21.7233	-0.193645	0.0235471	-0.39891	2.04119e-05	0.254375	0.0011366
107886039	7.09333	6.93667	6.26667	4.82	-0.0317845	0.263839	-0.17468	0.00146179	-0.55889	1.28963e-20
107886040	0	0.0333333	0.0233333	0.0633333					3.79502	0.00515605
107886041	49.43	37.3733	39.3667	32.4033	-0.41612	1.48822e-50	-0.342039	1.89692e-35	-0.61737	4.68189e-102
107886042	1.57333	2.18	1.92667	1.15	0.527792	0.000133676	0.3097	0.0190458	-0.381898	0.0075005
107886043	2.71	2.10667	2.09667	3.26	-0.347887	0.0294085	-0.344092	0.0266275	0.264388	0.0321411
107886044	1.57	1.6	1.01667	0.643333	0.122577	0.214706	-0.396683	0.0130295	-1.00332	7.40697e-08
107886045	12.3967	11.44	13.1733	13.5067	-0.113023	0.121358	0.0913285	0.143523	0.126293	0.0530426
107886046	17.3833	14.6167	8.44667	9.94667	-0.26172	1.16075e-07	-1.05505	3.59902e-79	-0.812957	1.12717e-51
107886047	0.0666667	0.153333	0.483333	0.306667	1.20949	0.0426718	2.85154	7.07479e-09	2.20258	3.2521e-05
107886049	473.423	289.177	83.2533	66.37	-0.700271	0	-2.44587	0	-2.7473	0
107886050	4.36	6.71333	4.96	2.97667	0.619332	8.06733e-14	0.18271	0.0241776	-0.543351	4.28991e-08
107886051	0.46	0.353333	0.68	0.476667	-0.434206	0.0935195	0.540185	0.0228378	0.0140087	0.268747
107886052	1.78333	5	5.01	4.55	1.47546	2.01717e-47	1.47898	1.16499e-47	1.35226	1.52564e-38
107886053	4.40333	9.38333	9.36667	9.66333	1.09168	6.52872e-51	1.09169	7.32592e-51	1.1299	3.7987e-55
107886054	0.956667	0.86	0.866667	0.87	-0.146897	0.264158	-0.140069	0.247692	-0.14891	0.171693
107886055	14.4533	11.9933	10.07	8.72667	-0.278242	6.57801e-06	-0.5308	1.42694e-16	-0.731386	2.10037e-28
107886056	1.29667	1.06667	1.13667	1.00333	-0.285999	0.0630086	-0.194173	0.125854	-0.372536	0.013829
107886058	12.08	20.04	22.76	22.7467	0.719474	1.44577e-36	0.901592	3.18326e-60	0.900225	4.79668e-60
107886059	1.32667	3.01	2.14667	2.71	1.18625	1.18729e-09	0.704618	0.000638471	1.02297	1.64614e-07
107886060	17.45	13.7967	13.4033	20.4933	-0.340365	1.57118e-08	-0.381845	2.45767e-10	0.24175	4.18456e-06
107886061	34.6067	30.9633	31.6267	30.7133	-0.160249	2.11155e-07	-0.128154	2.34805e-05	-0.167048	3.13761e-08
107886062	4.33333	5.44333	4.59333	3.93667	0.329329	8.22853e-06	0.0871537	0.125278	-0.134833	0.0335332
107886063	16.62	18.2333	14.5267	17.19	0.137589	0.0193015	-0.189743	0.00276841	0.0538216	0.126292
107886064	9.30333	8.60667	8.72667	9.73333	-0.113676	0.0136774	-0.0927919	0.0311391	0.0637632	0.0603271
107886065	85.4633	99.0767	99.0133	69.52	0.229379	5.23994e-15	0.231541	2.36671e-15	-0.278077	1.82046e-18
107886066	0.0933333	0.0833333	0.156667	0.13	-0.170626	0.329569	0.736373	0.065407	0.459704	0.115968
107886067	1.56	1.40333	1.67667	2.19667	-0.148607	0.205016	0.107679	0.230105	0.482075	0.00123665
107886068	23.09	21.1967	19.2933	23.45	-0.126497	0.0492901	-0.260105	0.00028936	0.0262005	0.20816
107886069	2.87	3.86333	2.64667	1.66333	0.438431	1.31968e-05	-0.140609	0.103273	-0.772174	2.56171e-10
107886070	12.6067	11.0733	12.87	10.5967	-0.182858	0.000570198	0.0359179	0.213374	-0.248995	2.12056e-06
107886072	0.61	0.206667	0.58	0.9	-1.55886	5.27691e-05	-0.0694646	0.32103	0.56683	0.013175
107886073	0.976667	1.15333	1.2	1.95	0.303304	0.0603428	0.261309	0.0806116	1.0199	1.33659e-10
107886075	1.37667	1.52333	1.10333	1.28667	0.185154	0.10441	-0.360964	0.0113038	0.0346257	0.232838
107886076	0.2	0.17	0.236667	0.233333	-0.221974	0.312565	0.275773	0.255986	0.26265	0.188548
107886077	2.77667	3.06333	1.95	0.683333	0.158546	0.137632	-0.482845	0.00128236	-2.00479	9.80113e-24
107886078	4.94667	4.80333	4.78667	5.29333	-0.0449771	0.302945	-0.0478477	0.272112	0.0889641	0.128431
107886079	1.05333	4.16667	2.06	2.30333	1.97347	3.61987e-42	0.963086	2.75098e-08	1.11861	2.06858e-11
107886080	6.35	12.2167	18.8633	12.04	0.952634	3.48306e-20	1.57994	9.42827e-66	0.93102	1.75741e-19
107886081	0.226667	0.2	0.13	0.243333	-0.203196	0.293346	-0.809663	0.056244	0.0908836	0.238385
107886082	6.98	6.04	5.80667	4.12333	-0.209854	0.0265549	-0.264298	0.00649795	-0.75302	7.73537e-12
107886084	14.21	10.58	12.3467	14.33	-0.419911	4.22383e-07	-0.195436	0.00906025	0.0155246	0.240445
107886085	2.65333	3.42333	2.77333	3.48	0.370893	0.000121481	0.0694937	0.216973	0.390862	2.46464e-05
107886086	0.18	0.193333	0.203333	0.133333	0.0910835	0.353355	0.167348	0.285316	-0.444935	0.115935
107886087	0.08	0.45	0.63	0.923333	2.52388	0.000155935	3.01346	8.54005e-07	3.55305	1.2392e-10
107886088	1.24333	1.15667	1.58667	0.803333	-0.0974225	0.270269	0.351782	0.0198853	-0.624066	0.000627955
107886089	55.3467	58.6133	52.33	58.5533	0.099254	0.00795184	-0.063908	0.0584772	0.0999466	0.0040739
107886090	1.84333	1.98667	1.17	1.26667	0.087033	0.267103	-0.636513	0.00023956	-0.525394	0.00106
107886092	1.16667	4.01667	1.3	0.953333	1.77502	3.36425e-45	0.145737	0.176483	-0.304629	0.034165
107886093	1.96333	3.34	3.65333	3.51333	0.750303	1.34873e-09	0.874668	4.01417e-13	0.826977	6.00795e-12
107886094	0.25	0.27	0.34	0.633333	0.113381	0.348469	0.459589	0.153848	1.35626	0.000339425
107886095	3.71	4.75333	4.13	2.76	0.38334	6.66277e-07	0.167803	0.0212898	-0.414487	1.35973e-06
107886096	4.83	7.07667	6.79	5.67667	0.573864	8.79048e-08	0.513814	1.71572e-06	0.249389	0.0108279
107886097	9.25	6.58667	8.21	7.69	-0.478989	2.60225e-07	-0.159338	0.0391242	-0.254428	0.00186292
107886099	5.84333	7.11333	6.42333	7.56	0.284232	0.0115515	0.140264	0.119789	0.376678	0.000502527
107886100	5.39	4.23667	2.50333	2.38333	-0.357115	0.0013773	-1.11715	4.02369e-18	-1.183	6.20596e-20
107886101	0.0233333	0.0466667	0	0	0.998437	0.263839
107886102	0.0733333	0.12	0.0766667	0.0866667	0.687737	0.155339	0.0473231	0.360367	0.351411	0.183937
107886103	0	0.0933333	0	0.0233333
107886105	0.02	0.0233333	0.02	0.0133333	0.467923	0.350976	-0.024015	0.370261	-0.796487	0.22306
107886106	38.1333	32.93	23.1867	23.4867	-0.213321	1.95618e-14	-0.717754	9.42607e-126	-0.701731	1.23128e-120
107886107	3.97667	6.73667	5.63	7.91667	0.764705	8.37701e-19	0.50826	1.69587e-08	0.999823	6.65145e-34
107886108	7.41333	9.63667	9.24	9.39333	0.37808	3.68604e-12	0.318582	5.83392e-09	0.3358	4.46135e-10
107886109	87.8	94.0333	111.767	118.993	0.103782	0.00129954	0.354584	5.27875e-30	0.445589	4.39215e-48
107886110	4.31333	2.78333	2.03333	1.76667	-0.638641	2.21878e-05	-1.09155	1.86701e-11	-1.29284	9.16354e-15
107886112	0.486667	0.313333	0.27	0.143333	-0.618761	0.0814026	-0.853274	0.0281765	-1.75479	0.000236203
107886114	125.977	165.57	149.76	120.07	0.406616	1.82806e-76	0.26507	1.03743e-31	-0.0541496	0.00961588
107886115	0.06	0.0166667	0.0533333	0.0733333	-1.75574	0.0938434	-0.178371	0.331972	0.303877	0.213427
107886116	2.15333	2.24333	3.16667	4.12	0.0497961	0.328496	0.555862	0.000126891	0.936344	6.01646e-12
107886117	3.42333	4.29667	3.72333	3.76667	0.326988	1.00042e-08	0.121704	0.023166	0.140541	0.00678135
107886118	8.15667	7.01667	7.33667	5.43	-0.218265	0.00531251	-0.152698	0.0317044	-0.585981	4.47861e-12
107886119	0	0.156667	0.116667	0	3.4314	0.023677
107886121	340.887	315.46	258.147	220.637	-0.114402	3.22892e-43	-0.403716	0	-0.624857	0
107886122	0.24	0.966667	0.826667	1.12333	2.0159	1.45147e-12	1.8043	8.68885e-10	2.24063	1.28143e-16
107886123	23.1233	14.99	14.6067	13.2467	-0.626564	2.96136e-33	-0.663475	1.09872e-36	-0.808585	2.67013e-51
107886124	2.94667	2.87333	4.19667	4.94667	-0.0675192	0.291867	0.381635	0.00341594	0.593415	2.9902e-06
107886125	0.96	0.753333	0.863333	0.3	-0.364934	0.168406	-0.166312	0.265986	-1.68181	0.000130264
107886126	2.88333	2.59667	2.77667	3.27333	-0.149689	0.170309	-0.0510206	0.295747	0.183764	0.0692225
107886127	7.54667	10.71	8.92	6.29667	0.501483	8.35502e-18	0.239055	7.30703e-05	-0.266592	3.09202e-05
107886129	2.94667	3.19333	2.8	2.61333	0.143693	0.158901	-0.0282396	0.329497	-0.187831	0.0685918
107886130	19.9833	19.47	19.06	22.62	-0.0318009	0.283709	-0.0623753	0.157453	0.182484	0.00145833
107886131	2.47	2.52667	1.86	1.53667	0.0396863	0.321302	-0.400803	0.00108687	-0.677043	1.65854e-07
107886132	0.0566667	0.18	0.136667	0.323333	1.68798	0.000614351	1.27687	0.0106313	2.52348	2.34098e-09
107886134	13.3467	12.7467	13.44	12.9067	-0.0620278	0.194809	0.0160428	0.322231	-0.0455099	0.161234
107886135	14.38	18.4467	18.3933	12.8467	0.368215	6.93838e-10	0.367558	6.18399e-10	-0.152221	0.00782196
107886136	5.2	5.20333	5.2	3.73333	0.0317932	0.307853	0.01663	0.327597	-0.446786	1.77535e-07
107886139	6.09	6.96333	5.45333	3.48333	0.194342	0.0215825	-0.156248	0.0554197	-0.80911	2.14303e-14
107886140	7.89667	11.0967	9.74667	12.2333	0.478911	2.8663e-14	0.292976	5.56149e-06	0.61647	4.75719e-24
107886141	2.58667	2.10333	1.17667	1.05	-0.205958	0.0496137	-1.13595	9.54654e-17	-1.29414	1.88664e-20
107886142	16.9667	15.2267	17.33	17.9467	-0.146426	0.0274584	0.0442261	0.226441	0.0893006	0.0662656
107886145	6.99	5.43333	11.9567	11.45	-0.387049	8.88051e-06	0.751503	4.3847e-26	0.715024	1.15589e-23
107886148	68.32	44.53	56.1	50.38	-0.619865	1.35252e-48	-0.285562	1.12202e-12	-0.440616	6.00341e-27
107886149	0.6	0.25	0.26	0.0666667	-1.2888	9.81149e-07	-1.20441	2.80207e-06	-3.11989	2.53737e-18
107886152	1.25	1.78333	2.1	1.43333	0.508865	0.00904949	0.745935	9.71603e-05	0.195731	0.116264
107886153	4.27667	5.39667	4.05667	6.49333	0.334767	0.000680698	-0.0787992	0.204458	0.593445	2.3164e-10
107886154	6.12667	7.85333	5.92667	5.96667	0.355163	9.63584e-07	-0.0509517	0.222687	-0.0433446	0.174815
107886156	6.03	7.64333	6.80667	6.81667	0.338124	1.1964e-06	0.170924	0.0106796	0.17331	0.00622842
107886157	0.0133333	0.0266667	0	0	0.998437	0.263839
107886158	2.12	2.40667	1.29667	1.02667	0.185663	0.0753109	-0.700213	5.83441e-07	-1.0406	1.7448e-12
107886159	13.7467	14.38	11.2367	9.31667	0.0629046	0.0843331	-0.293123	1.08472e-10	-0.562671	1.32967e-32
107886160	2.58333	2.98333	2.62	2.31667	0.199538	0.106678	0.0282767	0.333379	-0.176622	0.091122
107886161	17.7533	14.0633	14.3233	14.9067	-0.334138	3.20891e-05	-0.307023	9.88681e-05	-0.255317	0.000576046
107886162	3.89667	3.55333	3.78	2.89333	-0.136919	0.210174	-0.0440023	0.314286	-0.434744	0.00639569
107886163	7.58	8.96333	6.81667	5.59667	0.237791	4.56712e-10	-0.156536	9.68658e-05	-0.44167	2.46071e-25
107886164	1.33	1.99667	1.35667	1.19	0.588084	3.06541e-05	0.0327224	0.326431	-0.162601	0.102563
107886165	343.607	284.963	305.687	452.993	-0.278781	2.37454e-71	-0.174959	6.55078e-30	0.388434	9.92612e-172
107886167	1.11	1	1.04667	0.76	-0.161376	0.127197	-0.0902535	0.217114	-0.558823	4.87238e-05
107886168	0.986667	1.25333	1.37	1.10667	0.351611	0.038194	0.486943	0.00480288	0.17853	0.113586
107886170	8.72333	11.87	8.77333	8.21	0.447282	1.69852e-22	0.0123032	0.317361	-0.084409	0.0342694
107886171	2.26667	2.05333	2.21667	3.94	-0.120891	0.204149	-0.0151984	0.350781	0.814751	2.72088e-11
107886173	16.2133	20.8	22.01	16.47	0.355586	1.31911e-25	0.440522	1.03824e-39	0.0203387	0.174453
107886174	4.24333	2.52	6.24	12.3633	-0.747454	2.00497e-16	0.568063	3.65186e-15	1.55383	1.23901e-145
107886175	2.05667	2.48667	2.24	1.05	0.269338	0.0190963	0.118919	0.159148	-0.984032	4.05843e-11
107886177	3.12333	3.28667	3.79333	3.55	0.077402	0.22038	0.258736	0.00596701	0.17364	0.030994
107886178	0.31	0.376667	0.196667	0.51	0.317231	0.239711	-0.620952	0.126781	0.734795	0.0337788
107886179	7.11	7.08333	8.35	8.77	-0.00651141	0.385459	0.230943	0.00371613	0.301069	0.000115409
107886180	4.84	4.66333	4.04	4.64	-0.0597686	0.221855	-0.266522	0.000901499	-0.07125	0.119727
107886181	0	0.0833333	0	0
107886182	0.216667	0.263333	0.213333	0.18	0.314612	0.159899	0.0124216	0.366372	-0.243478	0.146408
107886183	0.87	0.623333	0.733333	1.50667	-0.488455	0.0544754	-0.2477	0.168138	0.79266	0.00023116
107886184	6.76	7.21333	7.97667	6.85667	0.0943806	0.0988668	0.240191	0.000265748	0.0220119	0.219301
107886185	0.28	0.446667	0.193333	0.15	0.663928	0.104543	-0.547177	0.171463	-0.913211	0.0569025
107886186	1.81	1.79333	1.89333	1.46667	-0.00756127	0.393396	0.0608941	0.296206	-0.30444	0.0404832
107886187	2.17333	3.32	2.97	2.62333	0.603178	1.40418e-07	0.4482	0.000105631	0.258578	0.0128525
107886188	4.68667	5.86667	6.38333	5.42667	0.350607	2.55199e-07	0.493938	7.33687e-14	0.185027	0.0033668
107886190	1.91333	2.26333	2.28667	3.49333	0.269789	0.100101	0.264473	0.0927199	0.87977	4.04304e-07
107886191	3.76	4.08333	2.18	2.16	0.116585	0.155512	-0.785625	1.09159e-09	-0.800914	3.35084e-10
107886193	40.5733	24.91	74.9833	83.52	-0.694745	3.40018e-43	0.897069	2.19587e-122	1.04015	8.24327e-172
107886194	6.41333	5.19333	6.11667	5.66	-0.304252	7.82257e-05	-0.0639281	0.177353	-0.180685	0.00679026
107886195	30.15	27.77	25.2167	25.1733	-0.115063	0.0139678	-0.252651	4.38971e-07	-0.262081	1.00121e-07
107886196	0	0	0	0.0166667
107886197	1.28	1.64333	2.55	10.7367	0.371896	0.0470585	1.01346	4.26419e-08	3.07993	8.40656e-127
107886198	79.8033	75.7367	84.11	103.87	-0.0759021	0.0215257	0.07801	0.0139983	0.378527	7.03918e-32
107886199	6.63	13.36	10.5067	13.75	1.00774	2.41492e-53	0.664594	1.85406e-21	1.05516	2.92515e-59
107886200	3.46	4.19667	3.81	4.54	0.284742	0.182852	0.147761	0.265888	0.399852	0.0642795
107886201	1.06333	0.943333	0.773333	0.443333	-0.15131	0.258439	-0.435848	0.0547166	-1.26228	1.85446e-05
107886202	4.27	5.42	9.49667	3.41	0.339994	0.00248857	1.15006	3.388e-31	-0.327451	0.00448378
107886203	6.93	3.64	3.20333	1.39333	-0.949886	6.82e-20	-1.13868	2.31526e-26	-2.31387	6.32401e-70
107886204	11.21	8.73333	7.11	5.09	-0.367707	9.88799e-05	-0.666396	2.14944e-11	-1.14772	1.37803e-26
107886205	10.7233	20.22	21.52	46.54	0.909904	2.01351e-42	1.00626	2.99272e-53	2.10504	0
107886206	1.32	0.83	1.89333	2.24333	-0.659457	3.48071e-05	0.536138	2.87909e-05	0.770507	3.14726e-10
107886207	14.25	10.0767	14.42	12.2633	-0.488296	3.24045e-20	0.0286662	0.238115	-0.206209	2.1991e-05
107886208	0.223333	0.24	0.133333	0.11	0.111919	0.323417	-0.731639	0.0352611	-1.04626	0.00471225
107886209	110.363	99.05	72.9233	54.41	-0.161832	4.74814e-28	-0.603387	0	-1.0241	0
107886210	1.94	1.84333	2.36	2.29333	-0.0751034	0.243398	0.28507	0.0050806	0.255891	0.00693222
107886212	32.8867	30.77	28.24	33.4633	-0.0993294	0.000483439	-0.223204	2.25736e-14	0.0190101	0.154912
107886214	14.72	11.91	7.66333	7.46	-0.312775	3.7723e-05	-0.951219	1.94206e-29	-0.985613	2.66431e-31
107886216	2.18667	1.88333	1.24333	1.06	-0.202875	0.0944889	-0.800652	5.57606e-07	-1.02753	4.26007e-10
107886217	431.43	376.353	265.367	164.733	-0.198569	2.79155e-88	-0.702571	0	-1.38212	0
107886218	24.8133	21.7867	21.07	9.94333	-0.195666	0.00011741	-0.245374	1.56535e-06	-1.31958	1.68682e-102
107886219	1.36667	1.42	1.23333	1.26	0.0626248	0.330023	-0.142867	0.219925	-0.127331	0.168658
107886220	26.6433	41.0067	35.8333	23.0667	0.635051	3.18195e-34	0.444979	1.59383e-16	-0.196534	0.000515854
107886221	5.92667	5.58333	5.40667	4.65333	-0.0779791	0.212285	-0.125006	0.104187	-0.339341	0.000448093
107886222	4.64667	6.58333	5.35	4.47	0.504982	6.11113e-07	0.2107	0.0276672	-0.0601911	0.178191
107886225	0.173333	0.0966667	0.11	0.15	-0.84612	0.118961	-0.638453	0.154187	-0.190807	0.219357
107886226	65.0333	67.9033	65.7833	71.2967	0.0751601	0.0185503	0.0309061	0.168069	0.145104	6.74422e-06
107886227	0.163333	0.32	1.10667	0.623333	0.952634	0.0213109	2.78164	3.11516e-18	1.88746	2.33187e-07
107886228	0.416667	0.603333	0.39	0.416667	0.57113	0.0301788	-0.105213	0.298305	0.046879	0.250014
107886229	5.39	4.51333	5.06	5.18667	-0.253344	0.0088085	-0.0877866	0.169631	-0.0561781	0.171453
107886230	7.38667	6.58	7.1	6.28	-0.167378	0.0152428	-0.0565973	0.191597	-0.231575	0.000705474
107886231	9.96333	7.96667	9.25	11.9433	-0.314361	0.000874292	-0.0989862	0.135459	0.261368	0.00108972
107886233	20.0867	15.26	11.1467	8.36333	-0.397814	2.04664e-23	-0.881529	5.65788e-93	-1.30573	2.39987e-174
107886234	1.60333	1.72333	2.19333	2.03333	0.152482	0.250574	0.426639	0.0364845	0.375593	0.0384437
107886235	7.42667	5.62667	6.43	6.81	-0.369408	1.78046e-06	-0.183706	0.00897418	-0.106617	0.05226
107886237	0.0233333	0.0133333	0.0433333	0.16	-0.738528	0.280606	0.858371	0.196287	2.75195	0.000262013
107886238	19.6333	21.6267	20.57	13.0833	0.133561	0.000394533	0.0608633	0.0607809	-0.592288	9.51354e-44
107886239	4.36667	5.03667	4.45	4.83	0.210854	0.0187906	0.0322853	0.298161	0.146162	0.0456593
107886240	3.59333	2.49333	2.59333	1.5	-0.53491	0.0001684	-0.480215	0.00051144	-1.28317	1.4815e-15
107886241	5.15667	4.69667	4.63333	3.98667	-0.137629	0.0456614	-0.157398	0.0233669	-0.374626	1.17748e-06
107886242	4.49667	4.2	3.69333	3.20667	-0.0907661	0.227901	-0.275105	0.0199579	-0.484735	0.000137825
107886243	0.673333	0.74	0.473333	0.456667	0.130888	0.244009	-0.517055	0.0126447	-0.562432	0.00500101
107886245	5.85667	5.04333	5.37333	4.35333	-0.217226	0.00561636	-0.124449	0.062651	-0.428684	1.57171e-07
107886246	5.53	4.57667	5.19667	5.28333	-0.274087	0.0128415	-0.0883637	0.192449	-0.0742953	0.156492
107886247	3.39667	5.44	2.78	1.83667	0.828146	4.29705e-32	-0.307025	0.000268669	-0.88133	7.28822e-21
107886248	0.0966667	0.296667	0.3	0.136667	1.57841	0.0119834	1.60422	0.00902736	0.450116	0.174175
107886249	0.0133333	0.04	0.0666667	0.0133333	1.5834	0.165714	2.39474	0.0448228	0.0294831	0.273235
107886251	4.90333	6.16	10.4167	10.4267	0.362081	0.000234101	1.06227	3.50212e-34	1.05194	1.39414e-33
107886252	4.66333	6.93333	6.19333	6.73667	0.569755	3.60559e-10	0.41226	8.10692e-06	0.52543	4.65168e-09
107886253	5.60667	7	6.67333	6.62333	0.321295	0.00119993	0.255017	0.0078497	0.238776	0.00768333
107886254	6.71333	6.70667	6.71667	5.37333	0.019368	0.358588	0.00394278	0.366602	-0.314417	0.00198716
107886255	9.61	11.1667	10.5167	10.75	0.219843	0.000420815	0.136414	0.0194269	0.16424	0.00397336
107886256	29.7367	31.45	21.8267	21.55	0.0807887	0.0151909	-0.446999	9.6005e-32	-0.448088	4.90977e-32
107886258	2.1	1.84	1.78667	1.23667	-0.23506	0.0621539	-0.232318	0.056187	-0.773388	4.19917e-07
107886259	3.53	2.47667	3.83333	3.52333	-0.511058	1.28232e-05	0.119364	0.124525	-0.00322065	0.271982
107886260	5.56	4.69333	5.32	5.24333	-0.287441	0.007862	-0.104022	0.157666	-0.0320793	0.222317
107886262	0.386667	1.21333	2.83333	1.69333	1.6663	4.21055e-08	2.88798	2.50362e-32	2.13514	1.11263e-14
107886263	14.8667	14.6	13.7267	10.2567	-0.0179013	0.315601	-0.103237	0.0234244	-0.532512	2.70979e-23
107886264	0.06	0.34	0.426667	0.09	2.5332	0.000190311	2.86613	7.15882e-06	0.620678	0.158879
107886265	0.276667	0.54	0.0866667	0.256667	0.95298	0.0208736	-1.67828	0.00970957	-0.0986537	0.243169
107886266	9.63667	9.90667	10.54	8.33	0.0574912	0.187535	0.0866591	0.0882011	-0.219648	0.000462757
107886268	65.0367	44.0333	35.6733	36.6233	-0.568433	1.09413e-56	-0.872205	1.88899e-118	-0.828964	1.68979e-108
107886269	72.47	49.82	33.1533	31.7133	-0.545561	5.49587e-39	-1.13333	9.36461e-134	-1.19123	2.51645e-144
107886270	1.94333	2.08333	1.65333	2.03333	0.0893005	0.305828	-0.229159	0.154083	0.0737328	0.216396
107886271	5.29333	7.4	6.87333	7.4	0.469235	2.10471e-06	0.353538	0.000340359	0.490684	3.1288e-07
107886272	6.84	6.59667	7.72667	7.99	-0.0509152	0.225549	0.177329	0.00514408	0.224515	0.000306787
107886273	0.796667	0.973333	0.8	0.866667	0.306449	0.0835808	0.0313439	0.342184	0.135549	0.162319
107886275	4.10667	5.78667	4.44333	3.80333	0.498359	4.17743e-20	0.119376	0.0235573	-0.114947	0.0215835
107886276	144.487	124.52	158.803	172.503	-0.218057	6.53956e-27	0.132939	3.67551e-12	0.249811	6.10491e-41
107886278	30.19	31.2367	26.44	25.3467	0.053711	0.15779	-0.186286	0.000387473	-0.253318	1.52985e-06
107886281	12.9233	12.5867	13.0967	20.0767	-0.0465928	0.24101	0.0284465	0.278	0.633671	4.61319e-25
107886282	11.4467	12.9133	12.2933	13.6867	0.173461	0.044463	0.102775	0.137328	0.261187	0.00228365
107886283	44.36	34	22.5	24.0067	-0.390071	5.18073e-37	-0.98947	1.02671e-187	-0.898819	1.56579e-159
107886285	4.20667	4.22667	3.51667	3.08333	0.00639392	0.388739	-0.2566	0.0112529	-0.443199	3.5646e-05
107886286	0.0233333	0	0	0
107886287	0.173333	0.156667	0.03	0.0866667	-0.139262	0.360231	-2.43329	0.022043	-0.990253	0.0918628
107886290	1.22333	1.48	1.23667	1.00667	0.269619	0.0658581	0.0120202	0.359543	-0.284681	0.0435997
107886291	16.5133	12.1067	12.3767	5.21667	-0.439621	1.07747e-07	-0.408773	5.52709e-07	-1.65055	4.32969e-60
107886292	3.01333	3.44333	2.33333	2.32	0.186726	0.0353707	-0.374435	0.000330518	-0.388335	0.000127573
107886293	2.53333	2.87	2.45333	2.09667	0.196438	0.0669691	-0.0388404	0.304006	-0.281541	0.0133552
107886295	6.82	8.26	9.41	12.04	0.288391	1.69342e-05	0.479355	1.26385e-13	0.825952	2.57969e-42
107886296	6.78	5.06	4.3	4.78667	-0.407245	0.00195135	-0.63697	3.96521e-06	-0.488285	0.000146635
107886297	0.656667	0.7	0.926667	0.226667	0.115747	0.299084	0.532539	0.0202931	-1.47319	1.63182e-05
107886298	104.667	80.7067	63.46	44.5567	-0.371614	3.13003e-33	-0.717636	8.96945e-107	-1.22177	4.97847e-257
107886300	0.136667	0.0533333	0.04	0.1	-1.3267	0.107144	-1.73929	0.0579873	-0.401337	0.191353
107886301	11.8667	28.3233	20.6667	26.64	1.23178	6.13552e-181	0.782156	4.64551e-63	1.15809	5.25853e-155
107886304	12.8833	14.43	17.3633	26.6967	0.166539	0.00435721	0.436406	1.9379e-14	1.04904	3.37657e-94
107886305	0.04	0.0666667	0.0366667	0	0.412459	0.305863	-0.836164	0.222661
107886306	8.53	11.0867	9.03	8.88667	0.377771	2.2277e-12	0.0838857	0.0726171	0.0624508	0.0905195
107886309	0	0.02	0.01	0
107886311	22.3133	18.03	18.2367	15	-0.297452	6.87751e-09	-0.278217	4.43975e-08	-0.560031	5.75174e-26
107886312	3.65	3.00333	2.95	2.28	-0.283778	0.0223186	-0.308389	0.0127014	-0.684953	6.96416e-07
107886313	4.67	6.25333	6.82667	7.30333	0.418616	2.3476e-07	0.547797	3.5741e-12	0.647484	3.60384e-17
107886314	14.1333	11.7567	10.16	9.66667	-0.273349	3.26662e-05	-0.484	1.22273e-12	-0.552669	6.46652e-16
107886315	13.48	13.0067	15.76	11.35	-0.0542451	0.136512	0.221366	7.1321e-07	-0.255191	8.59605e-08
107886317	3.60333	4.46667	4.81667	3.76333	0.312831	0.0551199	0.388597	0.0189293	0.0363326	0.242852
107886318	10.64	7.61333	5.79667	4.11333	-0.488521	1.43792e-25	-0.881827	3.32796e-70	-1.38037	6.6861e-143
107886319	19.6933	20.0433	12.3167	11.22	0.0207787	0.300808	-0.682186	5.86659e-35	-0.813938	4.04358e-47
107886320	0.16	0.26	0.18	0.213333	0.685952	0.0550858	0.174787	0.28174	0.412766	0.106597
107886321	54.1367	56.07	58.44	61.49	0.0487794	0.0443475	0.110182	2.59721e-05	0.182151	1.7224e-12
107886322	55.0267	49.3433	59.24	46.3633	-0.161976	6.06871e-06	0.101562	0.00206307	-0.247647	4.67285e-12
107886325	2.06	0.386667	0.81	1.59	-2.38832	1.80543e-08	-1.31424	0.00014268	-0.3752	0.0713811
107886326	3.04	2.1	2.36333	1.97333	-0.537646	0.000541488	-0.369365	0.00971283	-0.628798	3.74233e-05
107886327	3.46	3.52667	4.42333	4.96333	0.0510511	0.326179	0.372987	0.00877352	0.544039	9.86918e-05
107886328	7.57333	6.24667	6.10667	5.81667	-0.273041	0.00473369	-0.302043	0.00172984	-0.377839	8.6661e-05
107886329	51.5167	37.94	50.7	50.69	-0.439158	4.18714e-56	-0.0188493	0.207702	-0.0206864	0.135616
107886330	20.9133	21.3633	20.59	20.26	0.0309755	0.251489	-0.0291938	0.239299	-0.0253397	0.184146
107886331	1.74333	2.51	1.78667	1.77667	0.524163	6.72209e-08	0.0372058	0.292602	0.0323413	0.221014
107886332	2.57	4.31333	3.10333	3.63667	0.756298	2.34251e-10	0.288745	0.0155915	0.506527	2.23831e-05
107886333	0.0233333	0.07	0.0233333	0.0366667	1.46974	0.139938	-0.10358	0.361319	0.476942	0.220467
107886334	10.7067	11.77	11.1033	8.78	0.139562	2.20918e-05	0.0574787	0.0470404	-0.283911	5.37236e-16
107886335	0.523333	0.873333	0.716667	0.983333	0.72982	0.00608695	0.45084	0.0626169	0.89583	0.000349174
107886338	29.69	30.4967	33.86	35.4833	0.0414691	0.137728	0.193136	3.88129e-08	0.25536	1.29801e-13
107886339	0.466667	0.366667	0.323333	0.45	-0.303218	0.165076	-0.544536	0.0456414	-0.026012	0.261213
107886340	22.9367	20.8367	25.8167	26.35	-0.144169	1.59828e-05	0.165972	1.40063e-07	0.198545	1.5018e-10
107886341	8.61	11.28	11.0367	6.7	0.405026	3.01429e-20	0.375008	1.88287e-17	-0.344085	3.47129e-12
107886342	1.36333	1.47667	1.21333	1.18	0.100123	0.232195	-0.169433	0.123546	-0.218019	0.0511555
107886343	1.90333	1.96667	2.39333	1.95	0.0466223	0.306137	0.333545	0.00181762	0.0328409	0.225517
107886344	5.56	6.48	7.42667	7.57333	0.219324	0.0147137	0.419287	3.64746e-06	0.438128	7.29982e-07
107886345	0.136667	0.88	1.26333	1.32333	2.67017	6.70413e-14	3.19559	5.66008e-23	3.23931	4.27033e-24
107886346	0.446667	0.563333	0.303333	0.356667	0.313786	0.204616	-0.577434	0.0972759	-0.379647	0.120729
107886347	0.313333	0.506667	1.17667	0.933333	0.701634	0.0299845	1.91851	1.01333e-11	1.58804	5.77377e-08
107886348	3.08333	4.34333	4.58667	4.11333	0.498311	3.0389e-06	0.563601	7.90893e-08	0.388694	0.000160253
107886349	10.6267	11.6467	11.6267	12.3733	0.135705	0.0339941	0.135038	0.0301524	0.223474	0.000493204
107886350	7.22667	8.80333	8.28333	8.21667	0.300609	5.44065e-05	0.236091	0.00125472	0.229406	0.00104621
107886352	0.726667	1.04667	0.776667	1.27333	0.547227	0.00261272	0.132408	0.220741	0.831965	1.20883e-06
107886353	0.186667	0.263333	0.686667	4.03667	0.564228	0.176378	1.94808	2.38993e-05	4.49681	1.04997e-51
107886354	0.576667	3.10667	1.98667	4.76333	2.45491	4.01418e-21	1.81478	4.29161e-10	3.06576	1.30858e-39
107886357	7.81333	6.79	5.84667	5.27	-0.195204	0.000412346	-0.409611	1.18194e-12	-0.549066	7.87183e-21
107886358	50.96	43.72	40.8833	83.2033	-0.242628	8.26354e-08	-0.339133	1.28463e-13	0.698346	2.32355e-75
107886359	15.84	12.23	14.7633	14.37	-0.378177	7.2873e-13	-0.105767	0.0210658	-0.14401	0.0018826
107886360	26.7	15.37	12.4133	15.55	-0.793632	1.75197e-46	-1.09732	6.18465e-79	-0.775097	9.49171e-45
107886361	14.56	13.42	14.0433	14.1833	-0.114019	0.0689599	-0.0476498	0.21938	-0.0336733	0.190101
107886362	1.01333	0.956667	0.833333	0.356667	-0.0711649	0.312987	-0.27073	0.0870568	-1.5074	3.51369e-10
107886364	0.273333	1.14667	0.586667	0.89	2.08543	2.94166e-07	1.11587	0.0125579	1.69394	4.54553e-05
107886365	3.22333	4.20667	3.37667	2.68	0.376876	0.000870784	0.0602124	0.258591	-0.275889	0.0122366
107886366	1.24667	1.47	1.03667	0.666667	0.268534	0.0667751	-0.229738	0.104006	-0.868193	9.90992e-06
107886367	0.473333	0.336667	0.386667	0.563333	-0.468619	0.136634	-0.272488	0.214376	0.257994	0.147654
107886368	0.666667	0.693333	0.493333	0.416667	0.0356127	0.361669	-0.447852	0.0275291	-0.691371	0.0014318
107886369	5.54667	6.90333	6.11333	6.31667	0.31549	3.72631e-05	0.142649	0.0397349	0.183316	0.00773637
107886370	0	0.0133333	0	0
107886372	4.62	5.21667	5.01667	4.68	0.174437	0.0134578	0.118319	0.0606767	0.0169419	0.236614
107886373	4.63667	5.61333	3.74667	3.19	0.277672	3.38209e-06	-0.30496	3.28064e-06	-0.540576	1.92504e-15
107886374	6.27333	7.95333	5.12333	5.05	0.379241	1.99482e-15	-0.271032	3.47123e-07	-0.317307	2.03496e-09
107886375	1.08667	0.976667	1.68667	2.36	-0.148969	0.262483	0.642507	0.00274452	1.11497	3.02614e-08
107886376	3.03333	4.79	3.13667	3.42667	0.679151	4.13051e-09	0.0939705	0.204552	0.220897	0.0283143
107886377	0.0166667	0.0866667	0.0566667	0.0566667	2.5834	0.0343287	2.01346	0.0868902	2.02948	0.0574512
107886378	5.26	5.54667	5.94333	6.53	0.0744989	0.257083	0.175434	0.0771648	0.312531	0.00346029
107886379	0.42	0.296667	1.50333	2.11	-0.518988	0.221384	1.82366	5.77617e-05	2.30548	2.54536e-08
107886380	8.15	6.30333	5.92333	6.85667	-0.364163	0.000794057	-0.45506	3.58271e-05	-0.242266	0.00953205
107886381	12.5	12.7967	10.2967	12.9467	0.0403684	0.292889	-0.271999	0.0025489	0.0589255	0.156643
107886382	1.20667	1.17	0.68	0.373333	-0.0517257	0.329653	-0.825538	1.71821e-05	-1.71121	1.95869e-14
107886383	0.233333	0.63	0.443333	0.38	1.43457	0.00392953	0.944712	0.0487149	0.709339	0.0746931
107886384	0.333333	0.483333	0.996667	1.11667	0.520936	0.115876	1.55871	4.90173e-06	1.74262	8.60537e-08
107886385	4.44	10.2533	10.1133	24.1833	1.19534	1.57441e-29	1.18258	7.55403e-29	2.43903	2.69323e-181
107886386	6.84	6.83667	5.63	5.36333	0.203696	0.0138291	-0.197226	0.0203603	-0.199595	0.0124539
107886387	2.18667	1.98333	1.31667	2.1	-0.134168	0.231443	-0.744027	0.000296102	-0.0826779	0.196099
107886388	1.88	0.61	0.826667	1.72	-1.63403	1.12232e-08	-1.19584	5.19218e-06	-0.134034	0.166614
107886389	10.1267	13.36	9.47667	9.66667	0.399751	2.27197e-26	-0.0943298	0.0135922	-0.067363	0.0362694
107886390	0.233333	0.223333	0.0766667	0.12	-0.0390747	0.378668	-1.62666	0.000817503	-0.925188	0.0140831
107886391	0.646667	0.916667	0.466667	0.82	0.50615	0.0160527	-0.458886	0.0442291	0.336868	0.0494273
107886392	11.94	13.1933	11.81	9.07333	0.148887	0.00105963	-0.00377756	0.356879	-0.387116	9.16354e-15
107886393	8.08	9.2	5.86333	5.09333	0.183764	9.26388e-06	-0.469794	2.66339e-24	-0.670815	5.16592e-45
107886394	11.0833	9.55667	9.01667	8.03	-0.217724	6.54602e-06	-0.301988	6.2243e-10	-0.467447	7.76689e-21
107886396	34.8333	27.4433	29.9233	30.9267	-0.34182	1.21092e-17	-0.21586	3.11323e-08	-0.160716	1.64364e-05
107886397	29.78	26.5733	21.37	20.2133	-0.157662	0.000876999	-0.469603	1.16359e-20	-0.555428	1.02872e-27
107886398	0.813333	0.65	0.676667	0.253333	-0.325162	0.167091	-0.270859	0.182614	-1.68142	2.2129e-05
107886399	1.48667	1.89667	1.77333	1.54333	0.343721	2.50348e-09	0.248055	1.82763e-05	0.0453176	0.14279
107886400	1.88	2.65667	2.80333	3.60333	0.50049	6.58481e-05	0.585639	1.93157e-06	0.936344	4.67947e-16
107886402	2.32333	2.3	1.59333	1.37333	-0.0042414	0.395818	-0.531875	0.000284895	-0.751231	6.6692e-07
107886403	77.9	84.9767	89.7567	88.2933	0.143759	0.000683709	0.227004	6.29066e-08	0.197464	1.5573e-06
107886404	2.38667	2.56333	1.65667	1.74667	0.102736	0.187931	-0.525054	3.03238e-05	-0.457464	0.000129065
107886405	3.31667	4.08333	3.86	3.74	0.29613	0.00322608	0.220878	0.0202805	0.173101	0.0359672
107886407	13.5767	10.93	9.39333	9.44667	-0.317904	8.86994e-07	-0.53507	1.17444e-15	-0.529992	1.22799e-15
107886408	8.60667	9.11	8.32	9.47333	0.0793446	0.156804	-0.0492949	0.227138	0.134368	0.0270684
107886409	0	0.02	0	0
107886410	1.52667	1.43	0.706667	0.416667	-0.106315	0.210215	-1.12174	1.26447e-12	-1.88655	7.15195e-26
107886411	0.346667	0.81	0.92	1.39333	1.20617	5.64608e-05	1.39837	1.2482e-06	2.00163	9.70434e-15
107886412	2.57667	2.95333	3.12667	2.45667	0.201916	0.0218685	0.288883	0.00125955	-0.0705938	0.147751
107886413	15.8933	19.1467	20.0767	23.3067	0.265719	3.38517e-06	0.336398	2.24655e-09	0.544025	6.69382e-24
107886414	0.69	0.486667	0.363333	0.483333	-0.488698	0.0342979	-0.91505	0.000524563	-0.505565	0.0170353
107886415	76.6167	59.39	44.8567	35.1333	-0.371713	2.97081e-31	-0.777227	6.4101e-115	-1.12514	1.33751e-211
107886416	0.506667	0.596667	0.35	0.596667	0.225848	0.228124	-0.536737	0.0694806	0.22652	0.146329
107886417	0	0	0	0.0333333
107886418	0.01	0.0366667	1.05333	3.60667	1.99844	0.174195	6.89169	7.87646e-15	8.64294	3.50547e-40
107886419	4.95333	5.61667	4.91	3.53667	0.178704	0.0828415	-0.0180186	0.342061	-0.474748	0.000204456
107886420	28.82	24.4867	33.05	22.0133	-0.228267	3.05982e-06	0.204833	5.20802e-06	-0.379724	1.86485e-14
107886421	0.19	0.19	0.12	0.0566667	-0.00279036	0.399176	-0.691744	0.079014	-1.71836	0.00125292
107886423	8.58667	8.51	9.51	7.12333	-0.0101129	0.3856	0.141717	0.135969	-0.271092	0.0211282
107886424	7.88333	7.38	7.2	6.00333	-0.0984559	0.0915636	-0.132848	0.0327229	-0.391397	4.26505e-08
107886425	7.13	9.62667	12.6567	13.33	0.424403	8.52896e-07	0.824054	6.20284e-25	0.899628	2.40916e-30
107886426	0.16	0.176667	0.15	0.173333	0.135478	0.348966	-0.0975716	0.33938	0.107486	0.245026
107886427	5.60333	4.93	4.35	3.48667	-0.189911	0.0126232	-0.363137	8.07878e-06	-0.68766	1.17746e-15
107886428	27.33	27.9167	23.5733	23.8333	0.0328713	0.263839	-0.207459	0.000365601	-0.187166	0.000703326
107886429	18.8433	16.2467	13.1867	10.5133	-0.221823	4.10195e-13	-0.523007	2.79391e-60	-0.850393	4.70458e-140
107886430	11.9967	11.2833	12.2467	9.43667	-0.0877042	0.0920643	0.0322037	0.250857	-0.343503	5.87361e-08
107886431	16.7	18.5833	19.6	19.9467	0.159562	0.0541182	0.238797	0.00596158	0.257864	0.00200097
107886433	3.23667	3.13667	2.34667	2.08333	-0.0423145	0.27979	-0.462118	2.21291e-07	-0.637853	2.63655e-12
107886434	5.27667	6.01	4.66667	5.09333	0.180848	0.0147067	-0.179405	0.0183962	-0.06146	0.141333
107886435	4.49667	5.30667	3.27333	4.36667	0.240361	0.00368369	-0.45274	1.81981e-06	-0.044203	0.18617
107886436	6.98333	6.43667	5.56	4.28333	-0.121118	0.079641	-0.332997	5.40194e-05	-0.711785	7.43442e-16
107886437	1.54667	5.47	4	3.91667	1.81893	5.13548e-37	1.37282	8.27064e-19	1.34328	4.08249e-18
107886439	6.02667	7.39333	5.46667	5.69667	0.291834	8.05356e-05	-0.141838	0.0425759	-0.0821904	0.0990015
107886440	2.42667	2.65667	1.87333	1.4	0.123784	0.148568	-0.3773	0.00165603	-0.799879	1.0685e-09
107886441	212.787	146.217	115.333	80.9633	-0.553038	1.2579e-213	-0.897006	0	-1.39192	0
107886442	5.89	8.14667	9.6	14.6267	0.461779	9.52879e-11	0.700354	7.13841e-25	1.30448	1.43104e-101
107886443	8.24667	11.11	13.6433	21.8333	0.429271	1.34117e-07	0.725271	3.78296e-21	1.39893	5.6928e-94
107886444	0.293333	2.28333	2.86333	11.3267	2.92585	1.96379e-21	3.26088	2.05174e-29	5.22376	5.91233e-143
107886446	0.92	0.556667	0.33	0.21	-0.75244	1.0295e-05	-1.48218	1.57931e-14	-2.16364	1.20531e-23
107886447	1.04667	1.12333	1.49	1.16	0.101145	0.259633	0.507422	0.00101233	0.131816	0.137982
107886448	0.263333	0.3	0.24	0.233333	0.187747	0.203675	-0.123569	0.253893	-0.196993	0.132002
107886449	33.27	38.7567	26.1333	24.3033	0.225528	8.00321e-10	-0.339268	3.56981e-17	-0.446121	7.99239e-28
107886450	4.49333	4.11667	4.94	3.50333	-0.091591	0.198745	0.137087	0.0937914	-0.363702	0.000559387
107886451	86.45	94.7267	113.25	107.59	0.13632	3.70323e-10	0.394956	3.49425e-82	0.319561	5.692e-53
107886452	3.36	3.32667	3.12333	2.54333	-0.0145221	0.364304	-0.102719	0.12697	-0.404649	1.31429e-05
107886453	1.22333	2.00333	2.33	6.27333	0.677502	8.36862e-08	0.899642	1.05451e-13	2.3373	2.28889e-137
107886454	3.36	3.32667	3.12333	2.54333	-0.0145221	0.364304	-0.102719	0.12697	-0.404649	1.31429e-05
107886455	0.243333	0.353333	0.186667	0.416667	0.559842	0.0971376	-0.353217	0.202935	0.811535	0.0141241
107886456	7.45333	8.31667	6.33667	6.58333	0.157394	0.0256769	-0.231851	0.00285217	-0.176446	0.0108526
107886457	10.3667	11.8767	11.38	11.3367	0.210635	0.0264034	0.15097	0.0745058	0.141259	0.0592648
107886459	9.16667	9.43	7.86333	5.12333	0.0438804	0.214545	-0.218163	0.000158203	-0.835205	5.89394e-38
107886460	1.03333	1.12667	1.16333	2.09	0.142858	0.240856	0.187174	0.172665	1.03012	8.83769e-09
107886461	14.8167	14.57	19.27	23.5167	-0.0243261	0.306577	0.381754	1.65798e-11	0.677518	1.1327e-36
107886462	49.45	43.0333	62.1433	52.6333	-0.19955	1.18906e-06	0.330671	7.22488e-19	0.0883087	0.00934822
107886463	0.62	0.403333	0.443333	0.683333	-0.604786	0.0162946	-0.47277	0.0385103	0.168843	0.146167
107886464	19.65	27.7833	19.55	19.1033	0.499718	1.35586e-20	-0.00537842	0.354106	-0.0410204	0.151882
107886465	5.54	6.38333	5.08333	4.81	0.207326	0.000254712	-0.119805	0.0274634	-0.199553	0.000496081
107886466	0.883333	0.773333	1.11667	0.553333	-0.183495	0.184166	0.343171	0.0344761	-0.656819	0.00109343
107886467	1.17667	1.15	1.16333	1.01	-0.00755416	0.396867	0.00946802	0.367593	-0.192293	0.161572
107886468	4.47333	5.31667	5.22	5.83333	0.262543	0.0188974	0.210571	0.0434986	0.382378	0.000440151
107886469	9.65	10.89	7.04	6.81333	0.176052	0.012062	-0.452919	2.65464e-08	-0.499419	7.01775e-10
107886470	0.713333	1.32333	1.66	2.71333	0.867926	0.00514177	1.193	6.0129e-05	1.87871	1.14316e-12
107886471	5.10333	6.78	5.95667	5.35333	0.413827	2.74417e-08	0.228029	0.00206116	0.0758602	0.109296
107886472	6.48667	6.31333	6.04667	6.49667	0.00806463	0.378248	-0.0695708	0.171088	0.0147706	0.242269
107886473	0.416667	0.566667	0.46	0.68	0.429072	0.152868	0.132599	0.301972	0.685034	0.0276755
107886474	13.51	14.05	13.1367	12.0133	0.0560285	0.176678	-0.0396151	0.221551	-0.172105	0.00212329
107886475	27.1933	26.0567	38.87	33.9167	-0.0535974	0.110355	0.524732	1.73431e-45	0.320586	5.54412e-17
107886476	14.5933	21.0767	20.1267	24.8067	0.532024	2.79812e-31	0.470165	2.84175e-24	0.765161	1.95395e-68
107886477	0	0.0766667	0	0.0566667	4.44072	0.000955677			4.00218	0.00269609
107886478	1.03333	2.56	2.53333	5.58333	1.30273	5.22192e-15	1.29045	8.99736e-15	2.43515	5.32407e-72
107886479	6.73333	5.48667	3.96	5.61667	-0.305346	1.84658e-05	-0.775285	7.9074e-24	-0.258417	0.000120394
107886480	6.64333	9.56667	6.87	6.22667	0.53109	3.61888e-21	0.0540161	0.173345	-0.0898958	0.0534942
107886481	6.92333	8.80667	6.15667	7.01	0.345705	2.75867e-07	-0.167824	0.0137406	0.0151592	0.23838
107886482	37.1967	37.6133	30.9733	22.71	0.017658	0.28544	-0.261808	6.63589e-12	-0.704121	2.44334e-66
107886483	22.53	22.9633	20.1533	28.4367	0.0140883	0.315639	-0.267721	5.14559e-11	0.142274	8.71986e-05
107886484	3.03	3.27333	3.46667	3.69	0.0607329	0.257026	0.20572	0.0214031	0.228289	0.00776096
107886488	1.36	1.32667	2.24667	3.15667	-0.0239771	0.375517	0.739865	3.71968e-05	1.22797	9.38513e-14
107886489	2.61333	3.08667	2.91	3.05667	0.2477	0.00113969	0.165378	0.0206479	0.234502	0.00105452
107886490	0.03	0	0.0433333	0.06			0.598422	0.269294	1.02948	0.128308
107886491	1.17333	0.993333	1.58333	0.91	-0.236328	0.152254	0.436961	0.0160027	-0.356304	0.0409274
107886492	1.22667	1.63	1.61333	1.96	0.405323	0.0138555	0.392342	0.0144615	0.659838	3.12502e-05
107886495	5.01333	4.99333	4.98333	3.98333	-0.0107039	0.347972	-0.0120882	0.314897	-0.342321	2.3262e-12
107886498	2.35333	2.89667	3.08	2.72667	0.29944	0.00134505	0.387078	2.7153e-05	0.209795	0.0114324
107886499	0.583333	0.453333	0.52	0.206667	-0.332958	0.106811	-0.14137	0.239963	-1.46523	9.0489e-07
107886500	0.556667	0.546667	0.75	0.69	0.0233825	0.381888	0.402473	0.0536689	0.251647	0.103322
107886502	0.1	0.276667	0.37	1.49333	1.46741	0.00583068	1.89913	0.000146185	3.89213	1.14239e-27
107886506	5.72333	6.94333	7.16333	7.22333	0.286195	2.79201e-05	0.271973	5.77652e-05	0.306704	3.3287e-06
107886507	4.82667	4.59	4.61	3.91	-0.0761813	0.172049	-0.0690178	0.173354	-0.306098	8.14979e-05
107886508	3.29	3.60667	3.98667	3.56333	0.122615	0.0892241	0.268483	0.000917944	0.109359	0.069056
107886509	1.28667	0.68	1.11333	0.57	-0.903934	0.000904009	-0.179557	0.204049	-1.15233	2.94606e-05
107886510	5.17667	5.49	4.75667	3.87	0.0764412	0.180715	-0.122822	0.0771265	-0.447772	3.1078e-07
107886511	0.313333	1.79	2.15	1.91333	2.52823	3.08785e-72	2.78752	2.01005e-95	2.59534	1.39422e-77
107886512	0.41	0.88	1.03333	1.13	1.01487	0.0223348	1.27907	0.00319334	1.35376	0.00105932
107886513	3.97667	7.22333	5.82667	13.27	0.871996	3.64371e-16	0.567997	4.17949e-07	1.74292	2.42583e-81
107886514	1.06333	1.29667	0.886667	1.69	0.203447	0.158665	-0.223639	0.138151	0.556564	0.00109251
107886515	4.73667	3.73667	2.8	2.14	-0.345361	0.000130489	-0.76771	2.88647e-15	-1.14826	1.04853e-28
107886516	26.18	20.21	11.8233	7.59	-0.380379	2.37128e-29	-1.15325	2.714e-198	-1.78551	0
107886518	6.39667	6.72667	8.17	6.37667	0.0811058	0.243854	0.364269	0.00135387	0.000821969	0.274549
107886519	6.01	7.63	6.59	4.71333	0.342917	5.8634e-13	0.132499	0.0048169	-0.351278	3.02009e-11
107886520	0.193333	0.0466667	0.173333	0	-2.03806	0.000359015	-0.132368	0.300357	-5.69408	7.57655e-08
107886521	2.80333	3.01	2.34667	4.04667	0.113731	0.20508	-0.288019	0.0298366	0.512389	3.30164e-05
107886522	6.78333	6.08667	5.63	5.89	-0.145162	0.0462135	-0.255656	0.0013225	-0.186379	0.00861715
107886523	13.5933	18.04	16.83	11.42	0.422523	6.1301e-26	0.311184	2.95107e-14	-0.225566	2.82122e-07
107886524	1.41	1.16333	2.16	5.05667	-0.278894	0.0290008	0.609278	2.12364e-07	1.85045	1.0627e-85
107886525	0.08	0.113333	0.03	0.06	0.544029	0.221664	-1.44968	0.0810346	-0.384848	0.194085
107886526	32.9767	29.4333	21.6967	19.6033	-0.167129	2.91487e-05	-0.605169	3.0545e-45	-0.754069	4.72699e-66
107886527	23.32	24.5533	23.8933	27.3867	0.0778459	0.0301594	0.0406917	0.141571	0.235534	2.24561e-10
107886528	0.54	0.283333	0.246667	0.29	-0.948983	0.0032329	-1.16452	0.000489536	-0.917434	0.0021654
107886529	0.723333	0.39	0.24	0.51	-0.896725	0.000700866	-1.5854	1.22514e-07	-0.518571	0.0147721
107886530	24.5133	17.04	10.29	6.79667	-0.527651	2.20237e-39	-1.25507	1.65479e-168	-1.85176	3.89796e-296
107886531	2.25667	4.53667	4.32	4.16333	1.01888	1.33869e-39	0.952609	4.88863e-34	0.893369	1.08204e-29
107886532	10.9533	12.7333	10.6533	9.18	0.229474	1.78174e-06	-0.0408833	0.187861	-0.254788	5.2338e-07
107886536	6.79	6.1	8.33667	8.39	-0.118283	0.0578578	0.31657	1.00673e-06	0.349889	3.3742e-08
107886538	2.34667	4.51	5.21	3.75	0.937479	8.08738e-17	1.1463	2.85928e-26	0.639508	3.58332e-08
107886539	13.03	11.5533	24.4767	27.53	-0.160599	0.00855204	0.924708	1.13302e-70	1.08375	8.8208e-102
107886540	2.57333	0	2.48667	0	-7.55062	1.51602e-21	0.0134597	0.360801	-7.51957	7.37283e-22
107886541	0.276667	0.433333	0.38	0.566667	0.623307	0.0128499	0.45152	0.0516427	1.01398	1.69455e-05
107886542	0.04	0.116667	0.156667	0.273333	1.54158	0.11296	1.97588	0.0425659	2.76191	0.00192734
107886543	19.2667	24.4	14.6833	10.3833	0.335739	7.47923e-17	-0.39828	2.46144e-18	-0.892958	5.67915e-73
107886544	0.0833333	0.0633333	0.04	0.09	-0.378632	0.320633	-0.98654	0.190395	0.092986	0.261167
107886545	3.40667	3.68333	4.09333	7.45	0.103659	0.151301	0.258295	0.00399522	1.12321	1.25618e-44
107886546	13.9433	11.6867	14.8033	11.1733	-0.255883	3.42653e-06	0.0859991	0.0529491	-0.321439	4.02072e-09
107886547	3.86	4.19667	4.37	2.23667	0.0962831	0.213566	0.195311	0.056592	-0.873836	8.55168e-10
107886548	2.34333	1.89	1.39	1.99333	-0.329979	0.0971298	-0.777842	0.0018169	-0.234506	0.104386
107886549	12.29	14.7	12.84	13.5167	0.258056	4.15039e-06	0.0638697	0.130483	0.135558	0.00714755
107886550	0.206667	0.323333	0.206667	0.116667	0.661364	0.0700116	0.0223061	0.364302	-0.826373	0.0454663
107886551	4.30333	7.81667	6.76667	6.70333	0.84584	1.54773e-22	0.660273	1.55816e-13	0.614231	5.62596e-12
107886552	1.28	1.27667	1.33333	1.14	-0.00282387	0.398125	0.0568091	0.274636	-0.169299	0.074729
107886553	4.82333	3.6	4.97333	5.14	-0.423468	5.49283e-06	0.0441024	0.254847	0.0941587	0.0896746
107886555	8.64	8.28667	9.46333	8.11667	-0.059926	0.251446	0.152582	0.0531078	-0.231642	0.00747987
107886558	0.0766667	0.126667	0.0966667	0.13	0.718021	0.164389	0.362771	0.262589	0.760822	0.0931321
107886559	0.246667	0.29	0.21	0.133333	0.242029	0.225711	-0.220913	0.231599	-0.865298	0.0118278
107886560	0.07	0.653333	0.96	0.61	3.18686	4.19803e-10	3.74695	4.18416e-16	3.08628	1.34207e-09
107886561	2.69	2.19333	2.13333	2.1	-0.292451	0.0117014	-0.333334	0.00422558	-0.356325	0.00156016
107886562	5.76333	5.63	4.69333	5.86	-0.064243	0.237738	-0.300685	0.00150974	-0.00972091	0.258617
107886563	18.4433	17.9233	14.8533	12.9	-0.0477677	0.146408	-0.320463	1.73571e-12	-0.519605	1.08231e-28
107886564	6.93667	9.17	8.86667	10.51	0.399999	6.38893e-06	0.35489	5.5861e-05	0.597477	1.49953e-12
107886565	13.6833	18.22	13.61	12.48	0.427288	1.83986e-05	0.00962965	0.354559	-0.125782	0.084701
107886566	0.42	0.596667	0.326667	0.33	0.497176	0.0208809	-0.365489	0.0867831	-0.352173	0.063522
107886567	0.683333	0.926667	0.85	0.9	0.410411	0.0463828	0.305664	0.0953273	0.337335	0.050918
107886568	13.32	19.07	7.71	3.32333	0.519479	8.05693e-29	-0.787697	1.62022e-41	-1.99803	1.23423e-170
107886571	0	0	0.0733333	0
107886572	0.253333	0	0.14	0	-4.80789	0.00015596	-0.903391	0.0845645	-4.77684	7.95517e-05
107886573	68.8867	44.0733	64.35	53.1067	-0.642158	1.0827e-91	-0.0974103	0.000600257	-0.372357	8.71389e-35
107886575	0.07	0.0366667	0.07	0.43	-1.00156	0.263839	0.0134597	0.370261	2.59264	0.00239469
107886576	0.983333	0.776667	0.776667	1.75	-0.358502	0.0625289	-0.35254	0.05727	0.815178	2.38318e-06
107886577	6.53	7.64333	5.90333	3.08333	0.246259	0.000821999	-0.117401	0.0727951	-1.06861	9.33763e-31
107886578	17.5767	20.0267	14.47	19.6167	0.198782	0.0122946	-0.266472	0.00213103	0.175049	0.0138348
107886579	16.0233	16.7133	18.0167	14.63	0.0634475	0.0972543	0.170802	0.00011985	-0.122038	0.00418757
107886580	6.35333	7.04333	6.11333	7.43	0.146628	0.0244633	-0.0561941	0.195245	0.220917	0.000590614
107886581	27.1267	27.92	22.0133	19.4733	0.0378189	0.232054	-0.302449	8.27474e-08	-0.48459	5.61885e-17
107886583	87.89	66.0633	65.9567	31.5533	-0.410951	7.07316e-58	-0.414489	1.06172e-58	-1.47871	0
107886584	19.3733	11.4733	6.72333	3.86333	-0.772198	9.79428e-36	-1.54609	1.02702e-106	-2.34229	2.82499e-184
107886585	0.15	0.133333	0.226667	0.31	-0.256282	0.303704	0.569948	0.139373	1.05721	0.0129509
107886586	1.61	1.03667	1.2	1.22333	-0.662338	0.00174136	-0.459414	0.0163931	-0.464176	0.0100278
107886587	8.61667	9.07333	8.49333	8.40333	0.0787942	0.0689585	-0.0142745	0.309235	-0.032866	0.159558
107886588	5.16667	5.63	4.34333	4.17667	0.116581	0.0075477	-0.260235	5.87804e-08	-0.311211	8.0307e-11
107886589	4.4	11.08	17.1467	19.2633	1.33428	8.13574e-117	1.9675	0	2.12588	0
107886591	25.8767	20.6167	18.5267	16.9133	-0.325125	3.379e-08	-0.476316	2.35342e-15	-0.612041	1.5244e-23
107886592	2.04	2.62667	1.76333	1.37667	0.359976	0.00776097	-0.212713	0.0867323	-0.57251	0.000228976
107886593	16.6133	14.72	14.7933	10.6667	-0.178478	0.00226457	-0.170516	0.0028331	-0.639028	1.53123e-23
107886594	2.88333	4.5	3.54667	4.14667	0.679033	8.34035e-16	0.30304	0.000567646	0.49803	5.56115e-09
107886595	2.68	2.02333	1.53667	1.20667	-0.414333	3.78279e-06	-0.807006	2.94595e-17	-1.16127	1.46714e-30
107886596	10.28	12.51	14.22	13.2167	0.281352	7.15955e-06	0.465638	1.38434e-14	0.368386	1.22342e-09
107886598	0.15	0.0466667	0.13	0.06	-1.65649	0.0142562	-0.195401	0.292205	-1.24211	0.0224924
107886599	0.01	0.0333333	0.06	0.01	1.73829	0.140261	2.60082	0.0286628	0.0294831	0.273235
107886600	3.95	4.86667	3.44667	3.47667	0.314143	0.0176859	-0.177548	0.119646	-0.16863	0.0894237
107886601	49.9733	39.4867	53.5933	43.4667	-0.331719	5.05728e-12	0.111272	0.00793223	-0.193163	1.79943e-05
107886602	11.9367	14.14	20.24	18.1267	0.253831	7.62707e-05	0.772144	7.07463e-40	0.613936	1.2444e-24
107886603	1.52333	1.51333	1.51333	1.51667	-0.00156253	0.399176	0.0135766	0.358514	0.0294831	0.248511
107886604	2.35667	2.51667	5.83	4.97	0.0944065	0.249425	1.30609	1.16344e-27	1.08563	1.93262e-18
107886605	1.10333	1.08	0.71	0.596667	-0.0294176	0.363601	-0.630711	0.00112061	-0.883985	1.07093e-05
107886606	8.77	5.54	4.36333	3.60667	-0.65983	3.91892e-21	-1.02448	2.10343e-43	-1.31393	6.55645e-64
107886607	3.82	7.10333	6.35	5.03667	0.940821	2.72262e-24	0.758101	2.10564e-15	0.423601	1.4608e-05
107886608	19.66	21.35	16.88	21.0467	0.116155	0.0436412	-0.221722	0.000721571	0.0930721	0.0509119
107886609	0.393333	0.413333	0.193333	0.26	0.0655517	0.353174	-1.05693	0.00405145	-0.607947	0.0320985
107886610	25.4833	40.7067	65.0033	62.1267	0.667047	6.90277e-138	1.34791	0	1.29069	0
107886611	1.89333	2.04	1.97	2.01667	0.100581	0.114833	0.055374	0.213844	0.081448	0.100412
107886612	7.78667	6.41667	7.4	7.86333	-0.277508	0.000754262	-0.069685	0.176264	0.0245698	0.220181
107886614	27.5233	23.7833	27.6067	28.0067	-0.215304	1.14043e-06	0.00365325	0.355502	0.0312936	0.144272
107886616	1.17	1.18667	0.93	2.08667	0.00803769	0.395019	-0.336476	0.0868902	0.8226	1.91353e-05
107886617	0.01	0.0133333	0.0533333	0.0166667	0.564035	0.331093	2.60322	0.0284948	0.845059	0.190817
107886620	0.106667	0.11	0.106667	0.0733333	0.0907128	0.3739	0.0398972	0.362965	-0.545982	0.157989
107886621	6.15	5.2	4.10333	3.95	-0.244378	0.0116219	-0.587659	3.8555e-08	-0.63905	1.86918e-09
107886622	1.62667	1.84333	2.15	1.73333	0.178449	0.131135	0.40088	0.00395676	0.0887382	0.171703
107886623	0.72	1.19333	0.983333	0.626667	0.709407	4.53194e-05	0.430995	0.0115657	-0.215331	0.0968949
107886624	0.0633333	2.07	1.28667	2.55333	5.02921	7.64581e-09	4.35046	7.08866e-06	5.31636	6.51203e-11
107886625	1.86667	2.12667	2.53667	3.96333	0.094728	0.258155	0.33461	0.0166528	0.722537	1.75292e-07
107886626	19.48	17.82	18.31	18.1067	-0.133194	0.000721422	-0.104163	0.00561448	-0.121527	0.000967229
107886627	3.00333	3.01667	5.21	2.75667	0.00180275	0.399176	0.791983	2.49354e-13	-0.119741	0.112307
107886628	19.4033	28.53	22.2567	26.0733	0.561444	4.57798e-37	0.2075	9.25461e-06	0.429398	1.48257e-21
107886630	7.72333	7.87333	6.92	5.16	0.0243537	0.26562	-0.160446	0.00024291	-0.587161	5.93748e-35
107886631	2.55333	8.80333	4.19	2.17333	1.79188	3.16052e-119	0.724962	1.03758e-14	-0.219224	0.0181434
107886632	17.8633	19.4333	12.1633	5.36333	0.117947	0.002994	-0.556915	1.1043e-34	-1.73421	2.30884e-215
107886633	3.27333	3.09	2.87333	3.24	-0.111734	0.219794	-0.17272	0.120407	0.0652534	0.19328
107886634	0.14	0.123333	0.163333	0.226667	-0.138533	0.351417	0.241176	0.281844	0.71901	0.0676281
107886635	154.967	125.187	112.39	78.53	-0.306775	7.99804e-42	-0.46131	4.97954e-88	-0.969998	0
107886636	8.51	12.0767	17.7233	22.6967	0.506479	8.12505e-11	1.06448	4.38906e-52	1.4192	3.99191e-103
107886637	27.7367	20.0367	16.4033	17.1733	-0.45282	7.76642e-16	-0.739918	2.1081e-36	-0.679532	1.04044e-31
107886638	0.0666667	0	0.0333333	0			-0.98654	0.190395
107886640	3.95	6.18333	3.68333	3.45	0.653372	4.20356e-33	-0.0919231	0.0737094	-0.189063	0.00124653
107886641	27.78	19.9933	15.8267	13.4067	-0.482432	4.97093e-33	-0.819696	1.08046e-82	-1.04793	6.8893e-124
107886643	10.14	8.51333	11.45	13.67	-0.306692	0.000167721	0.028747	0.288159	0.290311	3.99631e-05
107886645	5.28333	5.94333	4.88667	3.71333	0.173026	0.0226047	-0.109483	0.0995114	-0.500119	1.95742e-08
107886646	5.34333	5.18333	4.72667	6.27	-0.0407585	0.303768	-0.171803	0.0497776	0.227488	0.00660697
107886647	1.61667	3.37333	2.33	3.54333	1.06396	5.13402e-12	0.537156	0.00104385	1.1374	3.70094e-14
107886648	7.11667	14.8967	12.49	20.8467	1.06407	3.63323e-42	0.815941	2.09066e-23	1.55753	7.90385e-105
107886649	7.45333	6.40667	5.81333	5.39333	-0.211057	0.0566456	-0.343778	0.00464429	-0.445131	0.000270803
107886650	0.17	0.826667	0.546667	0.386667	2.22776	9.09722e-11	1.64127	1.28312e-05	1.14457	0.00241253
107886651	25.1733	29.62	24.41	20.5033	0.245538	3.23296e-13	-0.0391609	0.129796	-0.280609	1.43241e-14
107886652	3.45667	6.31667	5.18667	5.64333	0.868415	2.24503e-29	0.589489	3.76676e-13	0.707361	3.3078e-19
107886653	14.43	13.9967	16.6233	16.24	-0.0424587	0.246573	0.206881	0.000724829	0.17096	0.00287563
107886654	0	0	0	0.0133333
107886658	8.35667	10.3067	11.1633	8.29333	0.317578	0.00103791	0.369719	0.000110643	-0.0413549	0.204329
107886659	0.573333	1.17	0.5	1.49333	1.03058	4.12e-06	-0.189465	0.21577	1.3738	3.60571e-11
107886661	8.58667	10.3267	10.5567	8.22	0.249512	2.66969e-06	0.276883	1.39536e-07	-0.123453	0.0114434
107886662	6.58667	7.82667	6.46	6.86667	0.248096	0.000401227	-0.0260823	0.292819	0.0595177	0.131881
107886664	16.4667	19.66	21.4667	27.9867	0.250235	3.56294e-12	0.381536	9.80655e-28	0.726356	1.02523e-108
107886666	0.51	0.483333	0.236667	0.42	-0.0879579	0.316628	-1.10947	0.000123031	-0.290924	0.085156
107886667	0.0666667	0.0866667	0.113333	0.106667	0.376949	0.254915	0.740291	0.100472	0.631655	0.0941191
107886670	9.1	8.54333	7.53	5.87667	-0.0898334	0.111117	-0.270904	0.000121285	-0.626689	9.34514e-17
107886671	1.07	0.643333	1.08333	0.696667	-0.73132	0.0138291	0.0149714	0.362626	-0.62891	0.0153719
107886672	13.39	11.67	6.74333	4.53333	-0.198084	0.0151261	-0.987046	6.31817e-24	-1.55725	1.82569e-47
107886674	1.42333	1.29667	1.49667	0.836667	-0.134349	0.289171	0.0722803	0.314118	-0.761649	0.00679081
107886675	2.38333	2.95	2.32667	3.31333	0.316538	0.0012844	-0.0259625	0.318	0.48598	2.61766e-07
107886676	6.48667	7.56667	7.71667	9.31	0.2231	0.015294	0.254509	0.00540249	0.522067	6.86443e-09
107886677	6.64333	9.03333	11.0533	8.37	0.44062	2.97744e-13	0.732344	9.16602e-38	0.329224	4.49741e-08
107886678	3.12667	3.04667	3.50333	3.36	-0.00103888	0.399176	0.213229	0.0361346	0.165687	0.0537262
107886679	0.0333333	0.15	0.736667	0.756667	2.24485	0.0172374	4.52821	1.2274e-11	4.55399	4.43872e-12
107886680	1.07333	1.53333	1.99667	1.48667	0.513919	0.00925201	0.893473	2.80479e-06	0.467813	0.00938826
107886681	8.68667	9.13667	8.03333	5.84	0.0963255	0.0766289	-0.0846943	0.0976349	-0.55395	2.21063e-15
107886682	0.1	0.18	0.06	0.0733333	0.870737	0.0778265	-0.691084	0.165836	-0.387543	0.177673
107886683	0.5	0.796667	1.86667	4.40333	0.651124	0.0154441	1.88988	9.7855e-17	3.12807	8.31342e-66
107886684	1.79333	1.65	2.89333	3.83667	-0.0286673	0.3684	0.692932	6.0018e-05	1.06292	4.93846e-11
107886685	93.8167	68.5267	68.5433	50.77	-0.459757	3.83509e-81	-0.459242	8.74795e-81	-0.884215	1.3308e-254
107886686	4.03667	4.60333	6.24	7.00667	0.212961	0.0392019	0.608617	7.35904e-09	0.730568	8.22142e-13
107886687	2.65667	2.61	2.87333	3.73	-0.0130573	0.386009	0.128484	0.204999	0.498909	0.00102697
107886689	22.16	25.8333	26.84	27.0067	0.234521	4.3829e-07	0.274908	2.042e-09	0.27167	1.85602e-09
107886690	2.03	1.99333	3.51333	4.81	-0.0204048	0.379739	0.798623	7.01457e-06	1.2382	4.58952e-14
107886692	4.19333	4.92333	4.71	4.54667	0.29963	0.00049903	0.188303	0.0199772	0.138144	0.0434774
107886693	2.94667	3.36333	3.50333	3.79333	0.194443	0.0334004	0.255294	0.00610809	0.368384	6.1192e-05
107886694	2.91667	4.44	3.86667	3.57333	0.613706	1.62185e-08	0.42521	0.000114877	0.299101	0.00372941
107886695	0.66	1.08333	1.12333	2.07667	0.715171	0.0191325	0.767367	0.0105358	1.64974	1.04046e-09
107886698	36.1467	28.0233	43.9333	41.1	-0.357546	3.71074e-20	0.302977	2.14482e-18	0.18532	8.87396e-08
107886701	2.71	1.74667	2.39	5.49333	-0.614885	0.000161363	-0.158922	0.140069	1.04197	1.06212e-17
107886702	9.66333	34.1433	28.37	84.4433	1.80984	2.47564e-250	1.55116	8.11041e-168	3.12924	0
107886703	0.163333	0.0833333	0.136667	0.343333	-0.937574	0.138677	-0.243698	0.297119	1.08326	0.0230609
107886704	1.31667	1.96333	2.71	3.06667	0.572476	0.000939106	1.03962	1.07712e-10	1.2124	5.09336e-15
107886705	1.55	1.20333	1.66333	3.10333	-0.349829	0.120172	0.118202	0.268892	1.01242	2.70085e-06
107886706	21.0833	26.17	17.2333	9.36	0.308104	4.15398e-16	-0.294523	2.22562e-12	-1.17661	9.95195e-130
107886709	1.70667	1.50333	1.47333	1.99667	-0.191628	0.151118	-0.214721	0.113567	0.218635	0.0646478
107886711	0	0.126667	0.0266667	0.116667	4.6595	0.000341019			4.50716	0.000362667
107886712	2.14333	7	4.9	7.9	1.70413	2.57961e-59	1.19739	2.27991e-25	1.86845	5.94098e-75
107886716	1.7	1.56	1.69667	1.40333	-0.125967	0.164359	-0.0046588	0.366448	-0.27487	0.0122271
107886717	0.406667	0.31	0.283333	0.233333	-0.393689	0.0961172	-0.528241	0.0387883	-0.827749	0.00285444
107886718	12.5533	10.9933	8.33333	8.68333	-0.174539	0.0107681	-0.57608	4.26167e-14	-0.514345	5.51942e-12
107886719	3.3	6.97333	6.29	5.75333	1.07841	2.30911e-39	0.933561	1.80926e-28	0.804048	8.1102e-21
107886720	10.6967	14.8467	10.57	18.8833	0.46983	1.08529e-12	-0.0205586	0.308364	0.821324	1.20867e-40
107886721	0.14	0.166667	0.303333	0.173333	0.320366	0.324414	1.18018	0.0841105	0.351411	0.211154
107886722	1.21	1.96667	2.29	0.56	0.704719	0.000880223	0.923224	6.40024e-06	-1.0937	8.69513e-05
107886724	12.63	11.83	11.6833	7.74333	-0.0913574	0.0165992	-0.107071	0.0052462	-0.702321	1.53702e-56
107886725	5.92333	4.14333	3.96	4.18667	-0.514798	1.13425e-07	-0.579556	2.89876e-09	-0.505377	8.76093e-08
107886726	1.65	1.58333	1.44333	0.763333	-0.0447577	0.309988	-0.189211	0.0600201	-1.11833	6.08776e-16
107886727	2.67333	1.95333	2.80667	2.99333	-0.452808	0.0111441	0.0710334	0.277175	0.158905	0.111302
107886728	17.1067	18.4567	14.3567	15.81	0.113318	0.0274046	-0.246321	2.27332e-05	-0.113996	0.0179812
107886729	2.42333	13.5933	13.57	26.88	2.50834	6.7323e-185	2.51496	1.42817e-185	3.47934	0
107886731	0.09	0.153333	0.09	0.06	0.814397	0.145596	0.0656681	0.357268	-0.481298	0.181678
107886732	115.2	101.73	86.1367	83.7267	-0.197139	8.67654e-15	-0.4374	3.07719e-62	-0.466976	5.1472e-70
107886733	330.473	249.263	171.737	211.56	-0.416607	5.77384e-152	-0.954883	0	-0.64461	0
107886736	10.0133	12.5567	10.32	9.4	0.338987	2.66836e-06	0.0596559	0.19313	-0.0782918	0.102688
107886737	0.0566667	0.0966667	0.0866667	0.08	0.735403	0.234611	0.633264	0.238222	0.525178	0.18922
107886738	0.73	0.883333	1.00667	1.53	0.270407	0.239123	0.467994	0.111257	1.06756	0.000928142
107886739	1.71	0.786667	0.96	1.41667	-1.10632	0.000162885	-0.817716	0.00244744	-0.270473	0.0958307
107886740	0.69	0.38	0.72	1.13667	-0.812812	0.059351	0.108961	0.313982	0.752257	0.0163673
107886741	0.273333	0.13	0.343333	0.86	-1.05384	0.0917252	0.351724	0.234984	1.68459	0.000125501
107886742	1.40333	1.53333	1.40667	0.8	0.140432	0.212728	0.0292729	0.33798	-0.789062	7.5002e-05
107886743	1.34667	1.32333	0.68	0.52	-0.0331904	0.346614	-0.992451	2.58786e-09	-1.37527	6.81308e-15
107886744	0.0733333	0.0333333	0.0933333	0.0966667	-1.19009	0.106991	0.304769	0.272676	0.351411	0.183937
107886745	16.42	13.71	11.28	8.69333	-0.255087	2.84804e-05	-0.546045	1.35544e-17	-0.915372	1.72521e-41
107886746	6.74	6.25	6.25667	5.70333	-0.111156	0.096621	-0.10282	0.10033	-0.246978	0.00115427
107886748	4.76667	4.57333	4.09667	2.68333	-0.0639835	0.254164	-0.220723	0.0229569	-0.821789	2.07902e-12
107886749	2.14333	2.11333	3.07	3.07	-0.0148051	0.388372	0.524165	0.00904711	0.522345	0.00588888
107886750	44.5433	39.0967	48.59	44.38	-0.189518	2.38335e-14	0.124735	1.00376e-07	-0.013942	0.171552
107886752	5.40667	1.98	1.34667	2.24	-1.47064	1.30946e-41	-2.02678	2.29537e-64	-1.27173	9.27605e-34
107886753	3.50667	3.50333	3.16	2.88667	-0.00248229	0.396489	-0.149801	0.0564157	-0.282688	0.00119554
107886754	4.09333	9.06667	6.78667	8.67333	1.17346	1.92232e-28	0.761159	2.59635e-11	1.08841	3.21454e-24
107886755	6.84667	5.87667	8.21667	5.92667	-0.203484	0.0204962	0.283335	0.000697305	-0.194679	0.0141644
107886756	6.34	7.35667	8.21333	8.85333	0.212001	0.00179052	0.371762	2.68428e-08	0.478272	1.98661e-13
107886757	0.0233333	0.413333	0.29	0.936667	4.15022	7.09919e-09	3.65732	2.27041e-06	5.32355	3.34878e-20
107886758	0	0.0133333	0.0133333	0.0133333
107886762	1.70333	1.95	1.81333	1.41	0.249661	0.0123664	0.0561356	0.25333	-0.331759	0.00173445
107886763	0.886667	0.583333	1.17	0.466667	-0.591853	0.000568859	0.414273	0.00302328	-0.951901	1.2471e-07
107886765	1.21	1.21333	0.973333	0.486667	0.0176276	0.380332	-0.295331	0.066634	-1.29864	7.83982e-09
107886766	0.0866667	0.0766667	0.09	0.0233333	-0.177813	0.346552	0.0134597	0.370261	-1.97052	0.0212504
107886770	5.02333	6.58	8.56333	10.5633	0.376952	4.96845e-05	0.776581	2.85207e-19	1.03928	1.50271e-36
107886771	2.48	2.30333	2.23667	1.45	-0.104874	0.228288	-0.147033	0.148255	-0.760943	1.38956e-06
107886772	0.65	8.01667	4.73	11.0933	3.63704	1.32998e-54	2.88494	3.52672e-27	4.10143	1.03981e-80
107886773	45.41	44.1167	48.6733	44.1133	-0.0396509	0.0989818	0.105005	0.000155631	-0.0349278	0.0771759
107886774	3.42	4.39667	3.30667	2.53	0.36248	3.95442e-10	-0.0459703	0.203661	-0.433998	3.26329e-11
107886775	35.7367	41.93	33.29	26.0633	0.224652	1.76929e-17	-0.109684	7.13424e-05	-0.463445	1.66686e-55
107886776	5.98667	7.63333	6.52333	8.03	0.335606	5.18299e-06	0.0952683	0.106739	0.404295	1.38508e-08
107886777	11.26	9.25333	9.24	6.89667	-0.279959	2.76493e-05	-0.28457	1.72436e-05	-0.708849	2.99618e-23
107886778	6.68667	5.94667	6.06333	5.08333	-0.139339	0.116825	-0.105637	0.157357	-0.367744	0.000620095
107886779	13.5567	11.8833	11.0667	10.1167	-0.187596	0.013224	-0.288554	0.000265679	-0.415123	2.46691e-07
107886780	0	0.05	0.00666667	0.0333333	3.86436	0.00778414
107886781	5.46	5.08	5.40333	4.4	-0.104496	0.211081	-0.0166906	0.345508	-0.310687	0.00887316
107886782	2.25333	2.51	1.62667	1.87	0.1547	0.245622	-0.468622	0.0427724	-0.279646	0.0916309
107886783	0.273333	0.23	0.266667	0.24	-0.229763	0.204299	-0.00234954	0.370261	-0.175741	0.161338
107886784	6.86	6.83667	6.52333	5.85333	-0.00878474	0.371387	-0.0733495	0.132151	-0.226529	0.000450541
107886785	0.416667	0.65	0.576667	0.61	0.681989	0.055309	0.51425	0.105288	0.597453	0.0496671
107886787	3.98333	4.71667	4.35333	4.76	0.240733	0.00337786	0.12565	0.0746024	0.252022	0.00114704
107886788	2.56	2.56	2.05667	1.59667	0.0239398	0.346629	-0.282318	0.00576766	-0.660982	4.69915e-09
107886789	9.97	11.2067	12.51	14.23	0.166286	0.015665	0.337246	1.38298e-06	0.506344	6.17167e-14
107886790	5.20333	7.68667	12.9533	10.85	0.567717	1.88962e-07	1.32346	2.1901e-44	1.07397	1.48705e-27
107886791	16.2433	13.9267	16.7033	15.59	-0.218456	4.9235e-05	0.0458771	0.171492	-0.0585738	0.0883353
107886792	14.5067	10.64	10.5	9.20667	-0.448211	4.0956e-13	-0.467009	4.06655e-14	-0.655681	5.06562e-25
107886793	2.8	2.89667	2.87333	1.07333	0.065089	0.280868	0.0662313	0.255147	-1.36356	8.64034e-17
107886794	10.78	10.8467	11.2467	9.89	0.0119347	0.365913	0.0664569	0.175796	-0.12268	0.0429498
107886795	8.81333	8.90667	6.67333	5.97667	0.0189249	0.360858	-0.395489	0.000498756	-0.556407	1.62891e-06
107886796	6.03333	7.29667	6.77667	5.86667	0.282109	0.000482339	0.155601	0.0351558	-0.0644398	0.14333
107886797	3.30333	4.01667	5.43333	11.1633	0.285847	0.0322892	0.726971	5.15159e-08	1.75076	9.53727e-56
107886798	13.0867	14.0867	11.91	9.82	0.104766	0.00432197	-0.137755	0.000340064	-0.422916	4.65284e-25
107886799	9.12667	9.67667	8.95	8.78333	0.090796	0.138714	-0.0255702	0.301707	-0.0503798	0.165166
107886800	1.06667	0.97	0.93	0.8	-0.148055	0.209924	-0.210615	0.126091	-0.42344	0.0113079
107886801	1.46667	1.44333	0.92	0.5	-0.000775435	0.399176	-0.649196	0.00111565	-1.5356	7.13304e-11
107886802	1.17333	1.33667	1.19667	1.02	0.18815	0.139938	0.0317572	0.332268	-0.191302	0.0933625
107886803	37.4733	24.3233	8.01333	3.89	-0.630221	1.21695e-39	-2.23268	4.27992e-277	-3.26917	0
107886804	13.03	11.36	10.4467	7.60333	-0.20164	0.000123666	-0.316052	3.7499e-09	-0.786153	4.9917e-42
107886805	17.0067	16.09	12.41	9.64	-0.0907891	0.0533461	-0.466461	7.32446e-17	-0.817137	1.91688e-43
107886806	0.783333	1.02	0.89	1.37333	0.39055	0.123148	0.193113	0.239299	0.811801	0.00262875
107886807	11.0267	13.3533	13.9967	10.97	0.277866	1.94382e-13	0.347041	1.00254e-20	-0.00678768	0.246224
107886808	20.4867	24.5267	40.7067	26.34	0.259764	2.16461e-05	0.99132	6.83173e-77	0.367101	5.1305e-10
107886809	6.78667	5.92667	6.54	7.84333	-0.186419	0.0183413	-0.0420901	0.254287	0.214926	0.00247856
107886812	4.34667	3.73	3.84667	3.57333	-0.22062	0.00448005	-0.174782	0.016456	-0.291104	0.000141237
107886814	17.08	15.51	15.4233	12.3567	-0.143385	0.00227573	-0.152001	0.00108737	-0.475231	2.97495e-21
107886816	4.31667	4.43	4.06333	3.81333	0.0413739	0.315796	-0.0820497	0.212362	-0.178918	0.0471284
107886817	2.48	8.51333	12.9067	13.37	1.78802	2.73032e-55	2.39514	1.19666e-120	2.44091	6.45188e-127
107886818	0.103333	0.15	0.116667	0.28	0.549345	0.103081	0.198887	0.26823	1.42962	2.25528e-05
107886821	0.0566667	0.01	0.0266667	0.0133333	-2.53843	0.0249096	-0.998819	0.135301	-1.79427	0.0335798
107886823	95.12	144.307	286.493	575.21	0.606327	9.26978e-151	1.59597	0	2.61081	0
107886824	17.3833	13.6533	18.19	20.4967	-0.342111	0.000339965	0.0757938	0.180614	0.239758	0.00245793
107886825	7.10667	8.34333	9.22667	11.67	0.232288	0.00131402	0.378369	1.05377e-07	0.714036	1.28829e-26
107886826	172.603	133.143	104.217	79.84	-0.379011	3.22854e-73	-0.733211	7.90168e-239	-1.10497	0
107886827	0	0.0133333	0.01	0
107886828	60.2867	53.88	40.98	33.6933	-0.166234	3.65235e-17	-0.559403	1.08407e-157	-0.841228	0
107886829	0.636667	1.02333	1.18667	0.75	0.677668	0.0102539	0.896103	0.000526034	0.23783	0.134148
107886830	0.01	0.0533333	0.0166667	0.0233333	2.38249	0.0526575	0.645728	0.293905	1.12034	0.15852
107886831	3.26	5.23333	3.67667	3.3	0.677267	1.63197e-05	0.166988	0.154872	0.00322184	0.273235
107886832	1.47667	1.86667	1.96667	1.43667	0.342398	0.0258339	0.418522	0.00655386	-0.0399304	0.235869
107886833	12.89	11.5867	12.17	11.9333	-0.157219	0.00575598	-0.0752365	0.0974583	-0.113586	0.0192971
107886834	3.70333	2.96	1.72667	4.17667	-0.339443	0.0180956	-1.11638	1.17174e-10	0.173458	0.0723013
107886835	4.58	1.98	6.93667	7.92667	-1.196	2.28369e-14	0.619943	5.22771e-08	0.798362	3.07406e-13
107886838	8.47	9.80333	7.13333	3.37	0.204273	0.0126267	-0.256352	0.00387563	-1.33079	3.47555e-33
107886839	8.86	9.29333	7.88	8.29667	0.0757777	0.142232	-0.162325	0.0132198	-0.0935614	0.0619759
107886840	12.3533	14.1067	11.69	12.6367	0.188338	0.00225485	-0.0704793	0.135893	0.0487853	0.141034
107886841	7.70667	9.61333	8.08333	7.39	0.315803	5.024e-22	0.066531	0.0301832	-0.0624418	0.0276744
107886842	0.1	0.0166667	0.0866667	0.08	-2.54892	0.0144527	-0.158745	0.324172	-0.271479	0.209656
107886845	3.26333	3.25	2.90333	2.47333	-0.0406995	0.308374	-0.189609	0.0420155	-0.419193	7.36664e-05
107886848	0.01	0.0466667	0.04	0.03	2.32037	0.0592433	2.01346	0.0868902	1.61445	0.100133
107886849	0.623333	0.76	0.626667	0.383333	0.288426	0.0634396	0.01565	0.355855	-0.701151	0.000372499
107886850	8.47	9.80333	7.13333	3.37	0.204273	0.0126267	-0.256352	0.00387563	-1.33079	3.47555e-33
107886852	11.51	14.74	11.7367	11.3133	0.334268	4.03085e-07	0.0467763	0.218112	-0.0154431	0.236964
107886853	5.22333	7.12333	4.78667	4.49333	0.446838	5.42075e-07	-0.125631	0.100976	-0.223233	0.0100543
107886854	5.36333	5.41667	4.38333	3.08667	0.0128501	0.369889	-0.291906	0.00199596	-0.801236	3.35517e-14
107886855	0.783333	0.42	0.436667	0.87	-0.845364	7.36226e-06	-0.887129	2.5123e-06	0.0522614	0.217719
107886856	3.00333	4.36333	3.66	5.14	0.510934	2.14724e-11	0.302802	9.93476e-05	0.812904	8.72651e-30
107886857	21.9933	33.9633	32.59	48.7	0.626981	1.47717e-24	0.57109	2.71528e-20	1.14655	4.04322e-94
107886858	32.9933	39.81	50.8367	63.8133	0.284647	6.78188e-12	0.64114	6.7986e-62	0.963979	5.72987e-154
107886859	4.8	4.76667	4.9	3.00667	-0.00446084	0.389921	0.0400981	0.254876	-0.675973	1.02426e-14
107886861	1.18333	1.32333	1.56333	2.10333	0.158902	0.227901	0.398485	0.0332028	0.819765	1.31767e-05
107886862	2.44333	2.59333	1.94667	2.32	0.0839903	0.23772	-0.329565	0.0080788	-0.0826094	0.158861
107886863	117.85	121.177	93.25	79.7833	0.058114	0.0197566	-0.315838	2.2256e-29	-0.541969	1.7208e-77
107886864	12.0733	14.3133	13.5233	11.5067	0.2491	0.00414753	0.169578	0.0344765	-0.0704785	0.142695
107886865	0.15	0.346667	0.466667	0.66	1.17517	0.00529946	1.6069	5.1728e-05	2.10629	5.84972e-09
107886866	3.9	4.53	4.68333	3.46333	0.20924	0.00281911	0.267007	0.000125857	-0.177396	0.00810205
107886867	13.87	14.58	13.1667	13.3633	0.0825678	0.112797	-0.0625673	0.159677	-0.0421826	0.160818
107886868	5.99	5.30333	5.1	4.98667	-0.178471	0.0618981	-0.233339	0.019812	-0.26117	0.00705384
107886869	7.86	8.36667	8.28333	8.01667	0.0877165	0.0410523	0.0733213	0.0643538	0.0236422	0.186326
107886870	18.3067	14.9633	10.86	8.22667	-0.286258	1.87975e-07	-0.746497	1.03162e-36	-1.14491	1.04027e-73
107886871	14.7033	14.8133	16.2767	15.6867	0.0203894	0.315734	0.15901	0.00266911	0.10069	0.0260599
107886872	6.37333	7.39667	6.43	7.06333	0.213061	0.00569041	0.0107135	0.345255	0.142523	0.028061
107886873	0.346667	0.283333	0.263333	0.443333	-0.289288	0.236557	-0.375621	0.173589	0.35962	0.11008
107886875	0.346667	0.416667	0.77	1.44	0.261204	0.267258	1.15919	0.00263063	2.06634	8.27092e-10
107886876	0.426667	0.593333	0.54	1.48	0.439884	0.129928	0.276226	0.207307	1.77484	8.36936e-10
107886879	0.833333	4.89333	2.05667	2.64	2.54261	4.95886e-78	1.30304	1.68322e-14	1.65543	1.97585e-25
107886880	0.776667	1.01333	0.746667	1.14333	0.382431	0.130472	-0.048895	0.342891	0.547363	0.0299107
107886881	4.54333	6.85	7.21667	5.99333	0.609844	1.16865e-23	0.665139	1.91609e-28	0.452523	2.73765e-13
107886883	10.3933	12.1867	15.7867	11.54	0.232558	1.95677e-05	0.6043	1.22645e-32	0.150035	0.00279311
107886884	0.426667	1.14	1.22667	1.81667	1.41277	6.90639e-14	1.51079	2.96278e-16	2.07199	2.0425e-35
107886885	6.12	10.12	9.23667	10.72	0.735999	7.07128e-19	0.606349	8.3362e-13	0.819704	5.60537e-24
107886886	0.136667	0.2	0.07	0.32	0.612905	0.127251	-0.895722	0.0900946	1.26962	0.00225066
107886887	0.726667	0.76	0.486667	0.47	0.0522651	0.337419	-0.58632	0.00411437	-0.641709	0.0012834
107886888	13.9033	15.3	14.9533	15.3	0.141207	0.0104069	0.110618	0.0317764	0.139189	0.00622396
107886889	7.23667	7.95	6.03333	5.7	0.139634	0.00778602	-0.257828	7.83012e-06	-0.347119	2.21123e-09
107886890	13.2367	14.9933	12.7033	12.7433	0.184357	0.00229423	-0.0515765	0.189848	-0.0506142	0.136066
107886891	9.34	10.85	11.1733	12.4633	0.213686	0.0182197	0.257122	0.00454326	0.419603	2.74798e-06
107886892	53.12	59.6633	45.8333	27.74	0.170444	1.40941e-08	-0.209912	4.94741e-11	-0.926997	5.9722e-147
107886893	1.64667	1.44333	1.39333	1.34	-0.192987	0.150951	-0.238577	0.0946379	-0.303319	0.0352195
107886894	1.98333	2.44333	3.50667	4.8	0.302071	0.0601399	0.826778	5.40557e-07	1.28085	3.22474e-17
107886895	0.42	0.396667	0.25	0.04	0.192926	0.281127	-0.800367	0.044046	-3.12211	2.31211e-06
107886896	8.63	10.3133	8.88	10.21	0.274587	0.0150909	0.0624766	0.256433	0.260103	0.0113409
107886897	7.01667	8.64667	9.22	11.8167	0.301934	3.21697e-05	0.396257	2.67588e-08	0.752331	1.61764e-29
107886899	0.0433333	0.0666667	0.0366667	0.05	0.5834	0.235036	-0.308468	0.30163	0.292518	0.216351
107886901	62.6167	54.53	42.3467	38.9533	-0.200567	6.8657e-25	-0.563854	2.09279e-165	-0.685465	5.86078e-233
107886902	0.0666667	0.0533333	0.196667	0.163333	-0.277848	0.321675	1.56013	0.00603258	1.29852	0.0147721
107886904	1.82	2.00333	1.98333	1.98333	0.147262	0.150058	0.134023	0.153104	0.12813	0.113016
107886905	6.88333	6.29	7.48	6.06667	-0.128972	0.0675198	0.121757	0.0615413	-0.178467	0.0111058
107886906	4.23667	2.7	1.67	4.15667	-0.665677	1.26625e-08	-1.35985	3.0539e-25	-0.0223492	0.238214
107886907	10.0033	11.2	11.2867	11.6167	0.150066	0.0263605	0.165355	0.013784	0.206576	0.00172013
107886908	27.8733	23.88	15.09	12.6533	-0.227546	2.30039e-05	-0.89132	4.21945e-50	-1.13845	2.67796e-74
107886909	0	0	0.01	0
107886910	3.07	3.21	4.35667	7.64	0.0614228	0.262716	0.504862	2.19736e-07	1.32048	2.57191e-55
107886911	0.113333	0.106667	0.0133333	0.08	-0.125463	0.357044	-2.96055	0.003907	-0.542423	0.139387
107886913	4.90667	6.54667	6.89333	5.37333	0.424274	4.91527e-07	0.499314	1.6632e-09	0.133019	0.0472341
107886914	11.6433	12.5633	12.0067	12.6333	0.109338	0.0588231	0.0469862	0.209922	0.124309	0.0211721
107886916	173.2	267.547	303.537	594.367	0.624929	5.29733e-286	0.808028	0	1.78319	0
107886917	0.0166667	0.02	0.146667	0	0.442044	0.3247	3.16321	0.000150026
107886918	0.18	0.246667	0.79	3.84667	0.429105	0.20313	2.11732	3.23701e-08	4.412	1.71194e-66
107886919	0.0566667	0.126667	0.373333	0.44	1.19347	0.0115587	2.76373	1.67043e-13	2.98459	7.65782e-17
107886920	13.3733	10.38	8.38	7.40333	-0.372565	1.04932e-16	-0.681749	1.44236e-47	-0.867255	1.94873e-71
107886921	0.326667	0.173333	0.06	0.0533333	-0.944492	0.0424418	-2.4654	0.000167628	-2.56691	7.26969e-05
107886922	2.63333	3.73667	4.85667	11.9033	0.468499	0.000195305	0.884563	4.63516e-14	2.19907	3.31837e-124
107886923	6.43333	6.11333	5.16667	5.5	-0.0702385	0.213403	-0.313306	0.000567401	-0.225591	0.00565967
107886924	10.7533	10.4733	7.54667	5.41	-0.0370671	0.276083	-0.50886	3.44361e-11	-0.986335	1.32302e-32
107886925	39.3567	51.7133	74.9633	82.1533	0.394696	6.91926e-42	0.932972	3.0973e-274	1.06745	0
107886926	4.21	4.65667	5.19667	4.33333	0.137134	0.0878964	0.295529	0.000993081	0.0331788	0.214113
107886928	0.04	0.06	0.04	0.12	0.63005	0.248835	-0.0361508	0.367573	1.56343	0.023507
107886929	22.5133	10.1367	11.0467	9.79	-1.16574	5.41858e-74	-1.02321	5.03183e-60	-1.18908	4.16319e-76
107886930	6.27333	7.02333	6.63333	5.36	0.170839	0.0016869	0.0887792	0.0607042	-0.218345	0.000103137
107886932	7.91667	7.05667	6.08333	6.33333	-0.174894	0.0268646	-0.38953	8.14046e-06	-0.317616	0.000121253
107886933	1.35	1.21	1.32333	1.03333	-0.158616	0.147219	-0.0271652	0.330951	-0.383231	0.00449562
107886934	6.79667	7.03667	9.15	9.56667	0.0593314	0.208308	0.440189	1.27109e-10	0.493327	2.07237e-13
107886935	80.94	66.1133	56.37	56.0333	-0.276678	1.0039e-10	-0.505186	2.94868e-30	-0.525773	1.38993e-32
107886937	1.04333	0.74	0.89	0.523333	-0.49097	0.0577159	-0.231014	0.184495	-1.00591	0.00070146
107886938	13.43	15.79	11.42	8.77	0.230673	0.00123318	-0.235888	0.00184853	-0.621155	6.59672e-14
107886939	1.22667	1.34667	1.09667	0.35	0.145384	0.210719	-0.147816	0.196808	-1.7832	1.26062e-12
107886940	0	0.02	0.01	0.02
107886941	4.17	4.10333	3.62667	3.82333	-0.0284843	0.316642	-0.209399	0.00706887	-0.143956	0.0282741
107886942	2.97	2.33333	2.74	2.18	-0.346854	0.016176	-0.11381	0.194927	-0.439322	0.00189569
107886943	7.53667	10.32	6.79333	5.40333	0.461536	6.57716e-10	-0.138439	0.0514852	-0.464645	5.73634e-08
107886944	37.4433	26.6	26.7433	23.6333	-0.496623	1.86826e-50	-0.48776	8.11062e-49	-0.66783	7.7641e-85
107886946	2.35	1.49333	2.54667	2.71333	-0.652913	0.002913	0.119314	0.233687	0.202259	0.0976331
107886947	0.0166667	0	0	0
107886948	0	0	0.02	0
107886949	2.09333	2.08	1.93667	1.76	-0.0172981	0.374727	-0.117124	0.19259	-0.252383	0.0349456
107886950	5.86667	5.07333	4.21	3.14	-0.193896	0.0317515	-0.460566	5.74165e-06	-0.883577	5.1835e-16
107886951	0.536667	0.753333	0.48	0.613333	0.496827	0.0240388	-0.155447	0.238166	0.202121	0.131826
107886953	0.196667	0.636667	0.533333	0.57	1.80626	1.06408e-09	1.44155	3.93704e-06	1.57118	1.68831e-07
107886954	0.653333	8.66333	5.05667	3.12333	3.76238	6.48499e-87	2.9916	1.12278e-42	2.2945	1.0614e-20
107886955	4.79	2.36333	3.42	4.11667	-1.01301	9.82176e-10	-0.477351	0.00110587	-0.212152	0.0497369
107886956	1.35667	3.66	2.39667	1.79	1.4233	3.81446e-35	0.818768	1.68127e-10	0.422552	0.000939033
107886957	29.14	31.6533	25.1533	22.4067	0.129083	0.0548107	-0.199021	0.00812072	-0.364949	4.31816e-06
107886958	11.3333	9.36333	10.7	10.2367	-0.273651	0.00305957	-0.0789326	0.176891	-0.147125	0.0399618
107886959	22.8067	25.5633	26.4633	42.7667	0.169345	0.017361	0.22155	0.0020478	0.903681	4.05503e-43
107886960	2.09667	3.88	9.22333	9.12667	0.88217	3.85831e-12	2.13508	6.10274e-99	2.11812	1.13084e-96
107886961	0	0.0166667	0.84	0.683333			6.99508	9.76034e-16	6.67478	2.53124e-13
107886962	1.06333	0.956667	1.52667	1.72	-0.153566	0.292753	0.524422	0.0445763	0.684835	0.00754635
107886963	0.556667	0.916667	0.7	0.36	0.743625	0.00477979	0.354981	0.109289	-0.608617	0.0278158
107886964	9.21333	9.34667	8.51667	7.73	0.0220667	0.341007	-0.110274	0.103865	-0.250979	0.00217765
107886966	0.0233333	0.01	0.103333	0.27	-1.00156	0.263839	2.18338	0.0181105	3.55305	3.6986e-06
107886967	7.39	10.2633	10.6933	10.8233	0.474138	4.5361e-08	0.535096	3.61365e-10	0.55112	5.53103e-11
107886968	406.217	492.903	362.123	194.753	0.282879	5.06693e-182	-0.161468	1.32133e-51	-1.04527	0
107886969	2.91667	3.78	4.06333	6.09	0.373947	0.0141632	0.483486	0.00146509	1.0632	3.4977e-14
107886970	3.53333	4.59333	3.13667	1.25333	0.416063	3.95599e-07	-0.139407	0.0648605	-1.47734	3.04495e-39
107886971	0.946667	4.27	1.91333	2.04	2.10492	1.33959e-45	0.934257	3.00063e-07	1.01888	8.74144e-09
107886972	67.7433	59.8633	68.35	63.12	-0.185384	5.88e-15	0.00529378	0.321615	-0.0977546	1.4152e-05
107886974	55.4067	42.5933	31.65	26.6733	-0.383372	1.32741e-44	-0.811702	2.23077e-168	-1.05462	1.38097e-259
107886975	134.68	117.55	121.037	138.04	-0.200305	4.32855e-28	-0.157597	3.27261e-18	0.0304541	0.0306292
107886977	0.706667	1.3	1	1.66	0.917819	0.000399304	0.555987	0.026606	1.30034	5.2962e-08
107886978	3.18667	2.82333	2.95667	5.23667	-0.178153	0.0532043	-0.109237	0.136003	0.709321	4.92219e-16
107886980	14.39	13.77	12.1967	11.8633	-0.0661976	0.180921	-0.240202	0.000760452	-0.280595	6.70522e-05
107886982	8.13	19.5433	15.8867	22.5767	1.2515	6.05713e-120	0.957365	8.09465e-64	1.45575	1.75329e-172
107886983	1.09333	0.99	0.383333	0.353333	-0.156864	0.0804269	-1.53355	4.17999e-31	-1.62835	5.98133e-34
107886984	2.04667	2.37333	3.42333	3.23333	0.218639	0.127348	0.746229	5.97936e-06	0.665724	3.72181e-05
107886985	19.6333	18.85	13.2967	10.5133	-0.0629906	0.144221	-0.566047	4.25682e-20	-0.902386	9.65156e-44
107886986	0.173333	0.0733333	0.0333333	0.04	-1.16492	0.0266695	-2.40182	0.000442458	-2.03678	0.000842282
107886987	1.46	1.61667	1.31	0.803333	0.169855	0.133376	-0.0882168	0.239792	-0.811281	1.26019e-06
107886988	16.99	10.9167	15.71	16.7867	-0.64372	3.40984e-30	-0.118042	0.013916	-0.0175207	0.213857
107886989	5.93	4.18667	3.32333	2.28333	-0.514152	1.9135e-10	-0.844593	2.79295e-23	-1.38449	3.4331e-50
107886990	7.66	12.9567	6.69667	7.63333	0.757077	3.39456e-46	-0.191256	0.00168955	-0.0168019	0.226795
107886991	0.186667	0.233333	0.126667	0.0733333	0.307499	0.129556	-0.549369	0.037957	-1.36698	3.6811e-05
107886993	0	0.0233333	0.146667	0.0266667			3.60082	0.0137178
107886996	2.52667	3.59667	4.47	5.02333	0.51657	1.72474e-07	0.831755	3.81714e-19	0.993938	2.36502e-28
107886997	12.8433	12.55	9.82667	13.6633	-0.0414594	0.213299	-0.394389	1.64798e-12	0.0801792	0.0429557
107886998	5.05333	4.77667	7.33333	7.01	-0.0767165	0.215459	0.544321	7.13576e-10	0.467596	9.66499e-08
107886999	1.51667	1.61333	2.89	3.97	0.100237	0.287419	0.941906	1.89768e-07	1.39472	4.8777e-17
107887000	105.027	94.74	75.12	87.4367	-0.145201	3.07358e-05	-0.477535	1.05983e-38	-0.255207	3.57451e-13
107887001	8.69667	8.06667	7.38	7.48667	-0.110268	0.0305124	-0.238658	1.85058e-05	-0.216828	5.25371e-05
107887002	0.863333	1.1	0.81	0.596667	0.345431	0.0166448	-0.0963463	0.238898	-0.536743	0.00107465
107887003	3.86667	4.34	4.80333	6.42333	0.18463	0.0673484	0.331953	0.00220233	0.745824	5.43238e-13
107887004	4.55	5.43333	5.63667	5.23667	0.258608	0.00179248	0.313456	0.000132487	0.199371	0.00762891
107887005	0.51	0.5	0.556667	0.563333	-0.0420631	0.358564	0.116212	0.252225	0.13144	0.168978
107887007	4.99667	5.38667	3.98667	3.59	0.10783	0.134173	-0.325537	0.000813576	-0.477116	1.63068e-06
107887008	8.52333	6.94	4.17	5.20667	-0.25656	0.00180036	-1.02307	4.43137e-27	-0.693237	7.16455e-15
107887010	15.52	19.02	13.3367	13.8433	0.289167	6.355e-07	-0.232816	0.000186135	-0.166638	0.00328664
107887011	0	0	0	0.00666667
107887012	6.57333	5.05333	4.68667	5.77333	-0.37382	4.08393e-07	-0.487957	7.31031e-11	-0.183812	0.00408741
107887013	2.05	3.58	3.86333	3.77333	0.798502	7.71247e-08	0.911161	3.26448e-10	0.89002	5.50704e-10
107887014	1.93333	22.1567	26.4	44.5667	3.49215	1.10261e-285	3.7544	0	4.52267	0
107887015	2.18667	6.86	4.88667	5.25667	1.65209	1.13704e-83	1.17011	3.10636e-36	1.26205	2.45377e-43
107887016	6.12333	14.76	14.2567	14.8833	1.26532	4.89408e-123	1.22012	2.28453e-112	1.2721	6.40959e-124
107887017	0.49	0.553333	0.356667	0.38	0.181162	0.225607	-0.460098	0.0518088	-0.378206	0.0572551
107887018	35.26	47.21	38.85	31.8533	0.426479	8.76819e-35	0.149097	3.70774e-05	-0.1432	9.27218e-05
107887019	3.30667	4.27667	3.5	2.95667	0.387863	0.000561899	0.0989745	0.184418	-0.154185	0.0735506
107887020	6.01333	3.44333	5.19	2.59667	-0.786853	1.39472e-17	-0.197088	0.0113374	-1.20086	2.7203e-34
107887021	6.94333	5.82	9.22	5.74	-0.234486	0.00286493	0.432961	1.24838e-09	-0.257597	0.000617285
107887022	4.32333	4.42333	4.19667	3.49333	0.0339374	0.336908	-0.0387663	0.302492	-0.303992	0.00794926
107887023	0.12	0.16	0.126667	0.116667	0.413475	0.204077	0.106569	0.328362	-0.0700526	0.254017
107887024	25.9733	28.4367	29.0367	18.84	0.132787	0.000650355	0.162535	2.63827e-05	-0.467252	3.35349e-27
107887025	15.9467	18.7267	13.6767	12.7233	0.235224	0.000197871	-0.216208	0.00117977	-0.321667	2.11938e-06
107887026	1.27333	1.94	1.20333	1.21	0.600765	0.000331302	-0.084556	0.270817	-0.0671558	0.212004
107887027	0.0666667	0.14	0.06	0.296667	1.06511	0.0584818	-0.11491	0.341291	2.14196	2.27983e-05
107887028	3.18333	1.55	3.14	2.15333	-1.02942	6.99684e-13	-0.0101412	0.355863	-0.552262	1.36539e-05
107887029	5.24333	4.88667	4.05	2.84333	-0.0970943	0.100332	-0.383443	2.80371e-07	-0.911327	5.29081e-29
107887030	5.15667	6.09333	5.04667	4.47667	0.245238	0.00337959	-0.0266302	0.305842	-0.200224	0.0118246
107887031	1.01667	1	1.20667	0.776667	-0.032984	0.350425	0.231405	0.0586679	-0.415894	0.0041508
107887034	7.76333	9	8.48	8.08667	0.216682	0.00611751	0.133065	0.0578778	0.065584	0.136841
107887037	0	0	0.0466667	0.0166667
107887038	6.60667	7.85333	9.13667	8.21	0.251324	0.0069046	0.469209	3.44324e-07	0.313156	0.000443153
107887039	0.653333	1.11	1.28333	1.32	0.753919	0.00233183	0.969955	5.2403e-05	1.00494	1.52931e-05
107887042	0.243333	0.536667	0.63	0.466667	1.10332	0.00693464	1.35879	0.000566077	0.925321	0.0130262
107887046	9.55	8.61333	6	5.67333	-0.152847	0.0377734	-0.673181	1.71443e-14	-0.753963	1.42263e-17
107887047	0.876667	1.28667	0.996667	0.733333	0.556165	0.00466231	0.19089	0.172093	-0.25197	0.092423
107887049	98.3333	101.147	104.993	92.54	0.0451884	0.062758	0.0988726	0.000225375	-0.0824124	0.00149002
107887050	12.4567	13.71	15.79	12.2267	0.156637	0.00391012	0.365486	8.30711e-12	-0.0147154	0.230174
107887052	12.1533	15.51	12.2033	15.4833	0.360638	3.03612e-05	0.0189887	0.327309	0.354998	2.00934e-05
107887053	3.85	4.55667	3.3	2.75	0.238571	0.0222276	-0.224957	0.0352406	-0.487808	5.17625e-05
107887054	5.51667	7.41333	6.84667	5.83	0.426172	4.3244e-07	0.314375	0.000190193	0.0767206	0.12512
107887056	51.0867	50.7133	47.0067	44.2567	-0.0122685	0.300612	-0.121043	3.47112e-05	-0.208395	2.05458e-12
107887058	0.0133333	0	0	0
107887059	20.7167	20.5233	17.7	23.3233	-0.00540241	0.370933	-0.215465	2.12588e-07	0.176955	2.80374e-06
107887060	2.77667	3.51333	2.46333	1.00667	0.361895	9.30681e-05	-0.149767	0.0735082	-1.47341	2.70146e-31
107887061	5.20333	5.53667	5.37333	4.76333	0.0675966	0.156635	0.0253129	0.28389	-0.184857	0.00254735
107887062	7.56333	6.42667	5.66667	4.89333	-0.246015	2.18853e-06	-0.427644	1.13325e-15	-0.644601	1.4093e-31
107887063	0.166667	0.07	0.08	0.126667	-1.23012	0.115262	-1.0516	0.127535	-0.386239	0.192508
107887066	10.22	8.62333	9.33667	11.1133	-0.239836	0.00856151	-0.123413	0.0931433	0.123152	0.0577805
107887068	2.11667	1.24667	1.30667	0.686667	-0.725103	2.89784e-05	-0.653209	0.000108778	-1.59983	1.16799e-15
107887069	0.326667	0.47	0.5	1.10667	0.546042	0.157713	0.631958	0.109287	1.78895	1.07492e-05
107887071	11.7667	11.9267	12.1833	11.0733	0.0174093	0.333931	0.0489886	0.187434	-0.0875987	0.0542565
107887072	1.71	2.18333	1.93333	1.75667	0.350684	0.00129078	0.17531	0.0657487	0.0266202	0.235712
107887073	6.11	14.1533	11.06	12.1433	1.21722	2.5781e-68	0.868737	1.47727e-31	0.996257	6.01812e-43
107887074	1.97	2.44333	2.96	2.15333	0.315826	0.0187354	0.595902	9.10193e-06	0.131534	0.119296
107887075	9.07667	8.40333	8.18667	6.4	-0.111625	0.0303558	-0.147588	0.00557165	-0.499891	2.28961e-17
107887076	7.40667	7.49333	5.85333	5.81333	0.0143966	0.361511	-0.339869	0.000103069	-0.351575	3.75456e-05
107887077	0.336667	0.256667	0.693333	1.15	-0.391718	0.187122	1.05864	0.00121571	1.7848	1.02475e-09
107887078	29.84	17.33	35.12	35.7367	-0.800506	2.99874e-44	0.21526	7.44852e-06	0.248373	1.29629e-07
107887079	3.38	2.76667	3.36333	3.44	-0.295925	0.0228488	-0.0136356	0.351414	0.0176402	0.253069
107887080	5.29	6.29	3.88667	5.08	0.249592	0.000521177	-0.424928	1.64155e-07	-0.0465431	0.166531
107887081	0.22	0.08	0.143333	0.0866667	-1.45966	0.00554742	-0.5819	0.105328	-1.29511	0.00564959
107887082	0.02	0	0.02	0.0866667			0.116029	0.357192	2.10888	0.016707
107887083	0	0.02	0	0
107887085	4.72667	4.27333	4.61	5.55667	-0.173217	0.0249097	0.00908083	0.349157	0.146649	0.0227906
107887088	5.21	5.48667	5.35	3.99333	0.0665885	0.109297	0.0306849	0.236319	-0.393321	5.59313e-13
107887089	42.41	37.81	28.59	27.9333	-0.163174	0.000511072	-0.578443	2.94862e-30	-0.610388	2.52863e-33
107887091	78.97	79.4567	69.7967	65.57	0.0226781	0.182392	-0.163191	1.05705e-10	-0.250939	7.37277e-23
107887092	8.21333	8.60667	8.80333	8.61333	0.0760253	0.270965	0.114462	0.185848	0.0729854	0.181672
107887093	6.26667	4.97667	3.57333	1.39333	-0.300574	0.000172565	-0.773191	5.96444e-19	-2.13748	8.6694e-85
107887095	0.13	0.0266667	0	0.0533333	-2.32349	0.0132127	-4.30847	0.00133079	-1.29244	0.0414954
107887097	12.1667	16.26	9.64667	10.3133	0.429342	3.41355e-10	-0.318384	3.37291e-05	-0.22741	0.00127579
107887098	46.6967	44.0367	36.87	38.6833	-0.0860305	0.00808178	-0.341506	1.85034e-22	-0.27337	1.8367e-15
107887099	6.50333	6.31	6.68667	5.57333	-0.0417958	0.258882	0.0443945	0.225792	-0.224574	0.00083879
107887100	3.94	3.43333	4.26333	6.45333	-0.19809	0.0658954	0.115658	0.150757	0.707543	8.48442e-12
107887101	56.67	58.63	42.34	27.8333	0.0573227	0.0663783	-0.410869	1.28576e-26	-1.01196	2.8683e-125
107887103	7.22333	8.03667	6.02667	5.16667	0.151506	0.0717626	-0.262089	0.00763927	-0.488404	3.17802e-06
107887104	3.37667	3.86667	3.31667	2.91	0.192451	0.000825629	-0.0279102	0.267161	-0.217943	0.000221466
107887105	7.11333	8.44667	6.92	5.94333	0.228113	0.000842986	-0.0479266	0.221537	-0.257326	0.000280155
107887106	2.10333	3.74	3.46333	2.27333	0.843083	1.2869e-05	0.738257	0.000136589	0.134676	0.165282
107887107	0.39	0.27	0.24	0.31	-0.53433	0.0621567	-0.687164	0.0233712	-0.332793	0.095863
107887108	0.163333	0.26	0.23	0.613333	0.635867	0.161503	0.428497	0.220246	1.85956	9.74078e-05
107887109	0.02	0.0433333	0.01	0	1.10608	0.1488	-0.976416	0.21974
107887110	13.22	13.45	11.8567	10.6933	0.0215391	0.271989	-0.159661	8.4695e-05	-0.311755	8.91267e-14
107887111	11.7267	9.04667	8.44667	8.34	-0.36902	9.04202e-06	-0.466035	3.08473e-08	-0.487253	4.76426e-09
107887112	3.88	5.33667	4.07333	1.88	0.464459	0.00346507	0.0744277	0.274693	-1.04506	3.73541e-07
107887114	3.57667	3.56	2.91	3.54333	-0.00603601	0.390922	-0.283012	0.0123183	-0.0157962	0.252694
107887115	3.11333	4.34667	3.37333	2.64	0.480307	1.72609e-08	0.116595	0.0995922	-0.228233	0.0070591
107887116	1.83	1.55333	1.41333	0.956667	-0.228929	0.0730132	-0.358371	0.0109657	-0.921764	1.48831e-08
107887119	9	8.31667	10.4567	12.4567	-0.123275	0.0647088	0.216667	0.00175363	0.446409	4.67105e-11
107887120	0.936667	0.763333	0.813333	0.556667	-0.298196	0.0978138	-0.197277	0.164145	-0.757559	0.000552279
107887121	0.12	0.156667	0.136667	0.0966667	0.393495	0.183522	0.21381	0.261838	-0.29878	0.164778
107887122	6.28	5.33	7.14	7.64667	-0.227558	0.0299829	0.196395	0.0352209	0.289973	0.0021577
107887123	4.01333	6.32667	5.46	6.38	0.647878	1.37002e-14	0.439606	4.0614e-07	0.659277	2.05055e-15
107887124	1.00333	1.82333	2.36	4.14333	0.845908	8.25113e-07	1.23751	8.81823e-15	2.04441	1.16939e-49
107887126	29.7033	23.62	15.42	11.6033	-0.335183	2.06053e-12	-0.951268	2.47177e-73	-1.35134	1.71985e-127
107887127	11.6433	10.47	11.09	17.38	-0.154414	0.0536801	-0.0703502	0.191229	0.572276	2.1796e-13
107887128	5.63667	5.41333	5.14333	5.48	-0.0511453	0.280206	-0.121406	0.115997	-0.0368843	0.210083
107887130	6.24333	7.02333	6.65	4.99667	0.167403	0.00100413	0.0861748	0.0537667	-0.323883	4.00156e-09
107887131	3.91667	3.65667	2.46333	2.80333	-0.0999694	0.0970744	-0.67214	3.20086e-17	-0.499398	6.22286e-11
107887132	2.52	2.58667	2.25333	1.62333	0.0231856	0.362287	-0.182146	0.100592	-0.628731	2.05098e-05
107887133	2.55333	3.05	3.81	3.26667	0.255335	0.0292051	0.576281	1.18556e-06	0.354947	0.00180432
107887134	10.1767	8.95667	7.35	7.28333	-0.179834	0.0181333	-0.477019	1.60997e-08	-0.500179	2.14175e-09
107887135	15.5333	17.7467	12.18	9.28667	0.191563	0.000193134	-0.350569	5.75945e-10	-0.739946	1.00041e-34
107887137	0.71	1.31667	1.2	1.18333	0.881252	0.00220504	0.750815	0.00792012	0.740865	0.00554795
107887140	0.0833333	0.453333	0.13	0.176667	2.44486	1.00611e-07	0.674441	0.133995	1.06985	0.0244674
107887143	1.06667	0.206667	0.566667	0.916667	-2.38186	2.29333e-32	-0.911779	5.28479e-09	-0.209376	0.0466773
107887145	0.0966667	0.14	0.0666667	0.123333	0.529377	0.144916	-0.546888	0.159649	0.310943	0.163577
107887146	6.72333	6.10333	4.58333	6.55333	-0.140526	0.0464501	-0.552169	4.16644e-11	-0.0352504	0.192836
107887148	30.0267	31.5467	25.5867	23.08	0.0715166	0.0209313	-0.22861	3.8681e-11	-0.382516	2.46642e-27
107887149	4.23333	3.93	3.1	2.87667	-0.111808	0.164472	-0.450894	9.39385e-05	-0.565341	1.12808e-06
107887150	32.4833	34.7333	42.83	41.38	0.101481	0.0164092	0.406199	5.08248e-22	0.356012	3.36752e-17
107887151	17.85	15.78	14.5233	10.0433	-0.1808	2.92235e-05	-0.299948	1.02353e-11	-0.829161	9.11783e-67
107887153	27.45	34.3533	32.61	27.2167	0.32252	1.36668e-29	0.248248	1.01724e-17	-0.0180998	0.16904
107887154	0.0466667	0.08	0.08	0.0833333	0.75249	0.106617	0.767512	0.0901644	0.866322	0.0432
107887155	2.02	1.66667	2.00333	1.78333	-0.281419	0.0507351	-0.0119511	0.357309	-0.187652	0.0794471
107887156	1.22667	1.23	0.876667	0.66	-1.6434e-05	0.399261	-0.489532	0.00171343	-0.899584	1.08587e-07
107887157	4.45	4.82333	4.08	4.88333	0.108189	0.083949	-0.130366	0.0488205	0.123164	0.0338926
107887158	4.38333	3.80667	3.33667	3.63667	-0.192119	0.0797304	-0.372104	0.00325661	-0.256844	0.0178854
107887159	0.2	0.45	0.24	0.233333	1.17501	0.000149904	0.281277	0.196175	0.252084	0.152519
107887160	3.66333	3.60333	3.78667	3.76333	-0.0336463	0.324429	0.043156	0.275666	0.0533027	0.181043
107887161	8.48	9.03667	9.11	10.7167	0.0919999	0.0836445	0.106442	0.0480841	0.338486	7.7828e-09
107887162	34.2433	39.63	20.7567	12.4967	0.214322	4.73659e-13	-0.718633	1.37998e-96	-1.44882	8.31327e-301
107887163	7	8.14667	6.17333	3.27333	0.215543	0.0132799	-0.185212	0.0332727	-1.09828	3.71316e-22
107887164	20.1167	20.4333	19.89	20.27	0.0227591	0.246058	-0.015133	0.274482	0.00720419	0.239923
107887165	6.01333	8.74667	4.94	2.17667	0.533977	2.97448e-16	-0.284146	0.000125857	-1.46619	1.34806e-57
107887166	5.53667	10.0233	16.7533	13.23	0.848628	3.69591e-27	1.59301	4.66177e-119	1.25575	2.02799e-66
107887167	17.93	20.97	20.1167	21.8633	0.227151	1.81956e-09	0.173033	4.56888e-06	0.290944	2.96652e-15
107887168	4.96333	7.71	7.17667	9.91333	0.637919	1.49849e-14	0.539768	1.42738e-10	0.996049	6.0308e-38
107887169	382.523	304.27	265.927	190.84	-0.329805	4.08521e-91	-0.522901	6.88687e-212	-0.992563	0
107887170	7.64667	2.42333	5.63333	1.77333	-1.65977	4.21885e-67	-0.447107	1.08615e-08	-2.09343	4.74402e-91
107887172	0.183333	0.11	0.18	0.136667	-0.747721	0.156426	-0.0156332	0.369107	-0.432569	0.160876
107887173	2.74667	2.23333	2.71667	2.93	-0.288114	0.0376838	-0.00451524	0.367832	0.102002	0.147358
107887176	70.01	58.6433	235.813	93.78	-0.26502	1.73035e-27	1.7421	0	0.392284	3.14417e-73
107887177	2.21	1.31	1.14	1.36333	-0.702344	0.000666528	-0.90021	2.43741e-05	-0.708622	0.000308837
107887178	0.643333	0.706667	0.236667	0.133333	0.160196	0.297816	-1.42753	0.00230326	-2.26238	2.70165e-05
107887179	13.38	14.3867	12.02	11.57	0.10747	0.0247798	-0.150794	0.00332611	-0.208795	5.4063e-05
107887180	2.92	1.60667	1.19333	1.25333	-0.834337	1.47297e-09	-1.28737	4.15573e-18	-1.2176	6.16162e-17
107887181	6.12	7.89333	5.74667	5.89333	0.364973	1.29694e-13	-0.0907209	0.0488104	-0.05998	0.0864864
107887182	0.0666667	0.0133333	0.0266667	0.0666667	-2.32349	0.122097	-1.33544	0.18252	0.0187567	0.273235
107887183	0.24	0.126667	0.2	0.09	-0.942669	0.15964	-0.273822	0.296357	-1.45675	0.0507312
107887184	1.77333	5.71	4.01	1.27333	1.65055	1.83216e-25	1.15604	2.13595e-11	-0.515704	0.0101432
107887186	2.00333	3.41667	4.56	5.52667	0.785745	4.53232e-08	1.21218	6.25303e-20	1.48681	3.45587e-32
107887187	5.96333	7.34333	6.96	6.94	0.302361	0.000159074	0.227512	0.00354849	0.223567	0.00257935
107887189	6.5	4.91333	7.93667	8.23333	-0.398493	0.000143474	0.295733	0.00109867	0.344777	9.09712e-05
107887190	3.4	3.19	3.01	2.86333	-0.0900005	0.205844	-0.173626	0.0632685	-0.249233	0.0106205
107887191	31.41	28.1233	21.86	17.1333	-0.156097	5.72222e-07	-0.519636	3.67793e-56	-0.868093	1.52115e-136
107887192	0.333333	0.346667	0.31	0.123333	0.055021	0.371009	-0.106835	0.316315	-1.44445	0.00284561
107887194	3.5	2.27333	2.07333	3.27333	-0.559865	5.16655e-05	-0.706445	5.77153e-07	-0.0316414	0.231439
107887195	17.7667	16.47	14.6533	16.0633	-0.107168	0.0167602	-0.274717	1.45973e-08	-0.142649	0.0011747
107887196	0.376667	0.38	0.31	0.206667	0.00740878	0.398847	-0.285452	0.221207	-0.857508	0.0264902
107887197	6.02667	6.9	6.10667	5.74	0.19083	0.00214931	0.0162927	0.317008	-0.0730265	0.090233
107887198	3.37	3.52	3.15	3.12667	0.0613177	0.27494	-0.0963302	0.189373	-0.111045	0.114571
107887199	2.11667	2.61667	1.30667	1.75	0.290257	0.197539	-0.71462	0.0425677	-0.3016	0.133845
107887200	18.8533	16.2967	14.4267	11.3767	-0.220474	1.05121e-10	-0.397696	5.25213e-30	-0.730357	3.03993e-87
107887202	0	0.93	0	0	6.69165	3.8557e-13
107887203	3.97333	2.97667	2.61667	1.46333	-0.400159	5.71734e-05	-0.584651	1.18081e-08	-1.42541	1.43614e-33
107887204	3.36333	3.9	3.63	3.72333	0.185907	0.031711	0.0772357	0.188823	0.127447	0.0616933
107887205	2.46333	1.91333	3.31	4.02	-0.337217	0.0210506	0.396472	0.0025992	0.707465	2.51219e-08
107887208	0.0233333	0.05	0.0833333	0.0866667	1.01242	0.228966	1.76626	0.0789105	1.83684	0.0466709
107887210	2.92667	3.24667	3.22333	3.19667	0.150114	0.0711988	0.139435	0.0762736	0.128385	0.0627597
107887211	0	0.0133333	0	0
107887214	23.7633	23.7933	13.2233	10.98	0.00346123	0.385534	-0.844198	6.8136e-57	-1.11063	7.06052e-89
107887215	5.19667	5.51667	5.88	6.08667	0.0929895	0.0578951	0.183335	0.000551892	0.232225	8.04393e-06
107887216	0.51	0.723333	0.506667	0.843333	0.500039	0.0261469	0.00487148	0.370261	0.735147	0.000663956
107887217	4.05667	3.98333	4.83	8.38333	0.00938062	0.38979	0.308946	0.0273666	0.983281	6.04868e-13
107887219	17.5	11.24	5.38667	2.76667	-0.641077	2.43989e-21	-1.70257	5.79713e-99	-2.66015	8.22728e-172
107887221	3.30333	3.61	3.34	3.60333	0.129872	0.115416	0.0184795	0.334438	0.123613	0.0773136
107887222	2.92333	2.71667	2.91333	3.33667	-0.107056	0.250192	-0.00515601	0.367882	0.187024	0.0825984
107887223	0.783333	2.83667	2.71	6.56	1.8715	1.29547e-26	1.81047	1.51086e-24	3.08323	1.68691e-105
107887224	0.52	0.903333	0.803333	0.383333	0.812882	0.0113116	0.647332	0.0344531	-0.43618	0.0974613
107887225	8.25333	7.35	6.30333	7.02667	-0.165989	0.0299868	-0.385412	5.88251e-06	-0.233939	0.0021724
107887229	0.05	0.0333333	0.05	0.956667	-0.581708	0.29676	-0.0108697	0.370261	4.23227	1.10115e-13
107887230	5.21333	6.14333	6.02	5.99333	0.231997	0.00478801	0.156858	0.0377338	0.0638839	0.145056
107887231	24.8433	22.9967	26.6867	28.2967	-0.103716	0.070062	0.111883	0.0431233	0.198057	0.000667127
107887232	10.6233	12.45	10.25	7.40667	0.225171	1.33549e-06	-0.0550738	0.125984	-0.522404	2.32138e-23
107887233	5.00333	5.03	4.33667	3.65	0.00670508	0.385757	-0.207091	0.0169992	-0.459264	1.52584e-06
107887234	3.97333	3.89667	4.08667	3.63667	-0.0293585	0.307964	0.0403502	0.247054	-0.128453	0.0330815
107887235	0.343333	0.223333	0.326667	0.31	-0.610684	0.0692824	-0.094354	0.31277	-0.16829	0.190813
107887236	0.246667	0.22	0.29	0.496667	-0.17486	0.318879	0.236305	0.256657	0.999447	0.00593531
107887237	3.29667	3.61333	3.02	2.50333	0.12464	0.0988339	-0.130847	0.0867646	-0.410992	1.84498e-05
107887238	1.73	2.35667	1.99	2.42333	0.42633	0.00383887	0.210333	0.0915367	0.481951	0.000566033
107887239	0.103333	0.07	0.0933333	0.0966667	-0.606113	0.16652	-0.16698	0.305821	-0.060039	0.257766
107887240	19.2733	20.2267	19.6367	23.08	0.0681067	0.128687	0.0263535	0.26802	0.264191	8.45708e-07
107887243	17.4733	16.1867	10.6333	6.94	-0.104008	0.00595371	-0.713394	5.37481e-62	-1.32802	1.18144e-170
107887244	5.66	5.39667	5.53333	5.33333	-0.0964612	0.177507	-0.0486869	0.262361	-0.102529	0.10329
107887245	0.0433333	0.19	0.303333	0.793333	2.12854	0.00137217	2.8158	2.19532e-06	4.1884	3.32894e-19
107887246	3.93333	4.52333	4.70667	3.67667	0.207277	0.0154441	0.267712	0.00186286	-0.0960504	0.102408
107887247	2.52	2.21	2.25667	1.75667	-0.194853	0.141674	-0.16517	0.158009	-0.5165	0.00206478
107887248	0.256667	0.23	0.146667	0.13	-0.148334	0.290703	-0.774268	0.0180891	-0.925995	0.00469133
107887249	24.82	22.5767	19.3767	14.8367	-0.12127	0.00154708	-0.339077	3.66238e-17	-0.725637	1.978e-64
107887250	11.8467	14.4367	17.5833	10.88	0.286322	1.84898e-05	0.567687	3.74636e-19	-0.122507	0.032182
107887251	2.39667	3.00667	5.18333	2.85667	0.350811	0.00117069	1.12019	6.67041e-32	0.240443	0.0121865
107887252	9.81667	10.0533	8.53333	8.99667	0.0362485	0.273385	-0.197663	0.00352923	-0.126119	0.026362
107887253	14.4033	15.37	11.6567	10.0467	0.0877538	0.05149	-0.310419	7.3756e-09	-0.525847	2.29021e-21
107887254	10.7667	9.60667	6.73	5.36	-0.174897	0.0191578	-0.681999	2.39437e-15	-1.00883	9.07056e-29
107887255	2.85333	1.97	2.83667	1.85	-0.5417	2.38777e-06	-0.015901	0.340255	-0.621323	4.66017e-08
107887256	7.8	7.08667	4.86	7.29333	-0.134674	0.0939843	-0.678139	1.16849e-10	-0.083671	0.121947
107887257	0.27	0.256667	0.29	0.21	-0.100862	0.355158	0.0962435	0.329794	-0.387762	0.145949
107887259	1.31333	1.24	0.9	0.35	-0.0887008	0.282798	-0.548726	0.00315853	-1.91628	3.00222e-15
107887260	0.0133333	0.0666667	0.03	0.0733333	2.23087	0.044186	1.07192	0.208933	2.34924	0.0189501
107887261	12.7267	13.43	15.7767	9.05667	0.0993628	0.083923	0.333089	2.40469e-07	-0.468737	1.60756e-10
107887264	21.1233	19.8567	16.0867	16.42	-0.0899439	0.097931	-0.391426	1.17811e-08	-0.361722	6.65324e-08
107887265	4.25333	3.87	3.52667	3.96333	-0.133865	0.123853	-0.265681	0.0113211	-0.0999539	0.116211
107887266	0.696667	0.546667	0.54	0.233333	-0.359291	0.0982424	-0.38231	0.0759829	-1.60167	3.98674e-07
107887268	0.726667	0	0.49	0.233333	-5.91708	2.1229e-08	-0.634525	0.0699872	-1.4692	0.00112481
107887269	4.86667	3.85	4.19	3.23667	-0.346427	2.67398e-05	-0.218966	0.00447821	-0.58993	3.8026e-12
107887270	0.916667	0.95	1.08	1.46667	0.0559597	0.338121	0.238644	0.116025	0.671308	0.000148757
107887271	0.02	0.02	0.02	0.0433333	-0.00156253	0.399176	0.0134597	0.370261	1.02948	0.169045
107887272	9.99667	9.45667	6.92333	5.22333	-0.0748723	0.142495	-0.539762	8.28077e-14	-0.940204	3.16604e-34
107887273	12.09	12.4167	9.13	6.68667	0.0372568	0.229425	-0.404969	3.8721e-13	-0.850447	1.02596e-45
107887274	9.88333	8.43667	7.96	7.58333	-0.236244	0.00319345	-0.318817	9.7162e-05	-0.390149	1.73332e-06
107887276	4.03333	4.86333	4.34333	4.11667	0.264764	0.000236242	0.100857	0.0897819	0.0262094	0.213387
107887277	3.11667	3.78667	3.87333	3.78667	0.288653	0.000397482	0.325885	5.16971e-05	0.283182	0.000259007
107887278	2.55667	2.94667	2.54667	2.10333	0.20156	0.001096	-0.00600501	0.353856	-0.289008	1.05918e-05
107887280	3.99	4.01333	4.6	4.38333	0.0034531	0.394181	0.202443	0.0122777	0.128846	0.0503843
107887281	2.5	4.18	2.71667	2.13667	0.736815	1.06604e-14	0.122285	0.121673	-0.223628	0.0178854
107887283	48.8333	42.9067	41.2667	33.47	-0.191605	2.28271e-07	-0.248905	2.24668e-11	-0.54045	7.65201e-44
107887284	0	0	0.01	0
107887285	6.74333	7.51	9.00667	13.74	0.139388	0.0930267	0.398047	2.11412e-05	1.00766	7.82409e-33
107887287	17.8433	19.9967	22.2667	20.4633	0.21485	8.30689e-06	0.344028	2.43287e-13	0.213885	4.45101e-06
107887289	6.16667	6.41	4.63667	4.45	0.0501494	0.266328	-0.415882	1.45045e-05	-0.476723	5.62489e-07
107887291	15.7433	11.12	7.11667	5.62	-0.502761	7.78439e-08	-1.14593	2.52714e-28	-1.48146	1.49242e-41
107887292	11.1	11.4933	13.92	16.6833	0.0548897	0.250036	0.333045	4.50545e-05	0.59208	3.46288e-14
107887293	7.03333	8.29	7.07667	5.18	0.238832	0.000236886	0.0120934	0.334238	-0.434306	1.72279e-09
107887294	2.94667	3.12	2.70667	2.36333	0.0813899	0.224761	-0.123534	0.134373	-0.320952	0.00278764
107887295	1.13667	1.05667	0.683333	1.00333	-0.0946567	0.316986	-0.700428	0.0111386	-0.169156	0.16319
107887298	0	0.326667	0.11	0.526667	5.26522	8.10243e-06	3.69603	0.0107036	5.94405	7.38863e-09
107887300	214.86	179.197	146.32	92.15	-0.272843	8.61849e-66	-0.565433	4.48821e-251	-1.22554	0
107887301	2.6	1.51333	1.48333	2.20333	-0.784852	2.46779e-05	-0.808378	1.27023e-05	-0.242935	0.0533844
107887303	0.0133333	0.463333	0.243333	0.186667	5.27046	2.69907e-10	4.34688	7.2978e-06	3.83684	0.000151224
107887304	26.04	21.98	28.0833	32.5533	-0.248267	0.000190968	0.105907	0.0504771	0.320745	6.16784e-08
107887305	4.63667	5.98667	5.62	4.89333	0.370006	2.71532e-06	0.280383	0.000344219	0.0759777	0.116115
107887306	10.3633	11.97	10.1367	8.13667	0.201529	0.000591459	-0.0370703	0.235584	-0.353989	2.87188e-08
107887307	50.0733	32.9367	27.62	28.0467	-0.61528	1.46947e-73	-0.869782	3.48951e-133	-0.840806	1.7486e-125
107887308	13.66	12.6833	12.0367	10.06	-0.132519	0.00476943	-0.238394	1.03625e-06	-0.457318	1.41076e-19
107887309	120.56	128.52	99.2867	77.5533	0.105741	5.813e-05	-0.263728	4.42366e-21	-0.620197	2.40085e-97
107887310	5.53	4.54	5.05333	5.83667	-0.272008	0.0017781	-0.116074	0.0906025	0.0829306	0.104527
107887311	1.77333	1.43333	1.99667	3.46333	-0.287386	0.0188838	0.191197	0.0586536	0.980087	2.01573e-21
107887312	1.44	2.92333	4.67667	5.29667	1.01709	2.91684e-10	1.69348	1.33038e-32	1.87168	4.79289e-42
107887315	0.403333	0.61	0.336667	0.333333	0.613147	0.0412612	-0.231653	0.234361	-0.270077	0.150463
107887316	15.57	16.4567	14.29	13.6133	0.0820249	0.129235	-0.119741	0.0510493	-0.191	0.00342501
107887317	8.55667	9.55667	7.36	6.75333	0.158648	0.00145658	-0.217961	4.34905e-05	-0.339747	3.75084e-10
107887318	4.51667	7.17	5.06	2.91667	0.672705	2.20688e-21	0.175255	0.0145522	-0.621239	1.42073e-12
107887320	9.88667	9.82667	8.51667	7.27667	-0.0111583	0.356933	-0.216374	0.000253714	-0.439141	1.26463e-12
107887321	23.12	26.4633	28.9767	29.71	0.194521	6.09918e-06	0.327383	5.32066e-15	0.361813	2.06919e-18
107887323	0.0133333	0.203333	0.143333	0.573333	3.77138	0.00043439	3.31065	0.00317751	5.27779	1.1681e-10
107887324	21.4767	24.0267	26.3567	31.53	0.17154	0.0113934	0.307997	6.95529e-06	0.561202	1.02629e-17
107887326	0.353333	0.563333	0.616667	0.743333	0.677948	0.0159604	0.809679	0.00351177	1.06345	5.86977e-05
107887327	0.123333	0.126667	0.07	0.0266667	0.0440096	0.383213	-0.778239	0.0988238	-2.15393	0.00205079
107887328	3.93333	6.14	3.99333	3.89	0.63848	1.4907e-06	0.0207645	0.342789	-0.0151399	0.259046
107887329	16.6033	22.3433	17.11	16.6833	0.434489	2.21045e-14	0.0525305	0.177051	0.0153568	0.231286
107887330	11.4233	13.61	11.19	8.40667	0.250526	8.35932e-10	-0.0301714	0.211402	-0.444107	1.77761e-22
107887332	6.78	9.03667	7.69333	6.13	0.422595	1.12815e-06	0.192577	0.019665	-0.135784	0.0543758
107887333	0	0.0766667	0.0733333	0.02
107887334	6.28333	5.99667	5.76333	5.56667	-0.0665922	0.250913	-0.124942	0.119076	-0.171411	0.040198
107887335	0.703333	1.04667	0.946667	0.583333	0.571235	0.000158811	0.427791	0.00405246	-0.267733	0.0454312
107887336	1.04	0.45	0.683333	0.333333	-1.19147	0.00104005	-0.590348	0.0418534	-1.63808	1.8099e-05
107887337	11.5167	14.9767	13.3367	13.6133	0.383489	6.78325e-14	0.218195	2.77501e-05	0.248713	1.02549e-06
107887338	11.8633	11.2367	9.89	10.5833	-0.0689145	0.219955	-0.252671	0.00472438	-0.155153	0.0337889
107887339	2.39667	2.45333	3.66667	2.39333	0.0285994	0.363369	0.584812	0.000157721	-0.0117396	0.26549
107887341	0.22	0.166667	0.123333	0.126667	-0.404564	0.243849	-0.80216	0.110624	-0.761212	0.0823704
107887342	7.52333	5.98	4.83	6.36333	-0.278784	0.00420723	-0.379411	0.000146341	-0.190513	0.0199362
107887343	76.3	76.9433	79.4733	69.2867	0.00777551	0.316435	0.0544277	0.00739961	-0.143785	5.5234e-11
107887344	35.98	26.4467	20.1367	20.64	-0.450076	7.51978e-20	-0.844038	3.98777e-58	-0.804112	1.16071e-53
107887346	0.403333	0.496667	0.416667	0.55	0.290618	0.160541	0.042606	0.341952	0.414773	0.0472442
107887348	1.31333	1.84667	1.75	1.55	0.491874	0.0145524	0.414148	0.0307304	0.243694	0.0899756
107887349	0	0.03	0.0333333	0.03
107887350	6.13	7.13	5.34667	5.02	0.207251	0.00175001	-0.202687	0.00341177	-0.26008	0.000167944
107887351	16.9567	19.94	17.17	13.8967	0.23818	4.16109e-08	0.0171458	0.286084	-0.282324	1.35851e-09
107887352	1.08333	0.98	0.913333	0.636667	-0.116976	0.239705	-0.210427	0.114468	-0.73662	6.276e-05
107887353	34.6833	27.3667	21.3867	21.27	-0.337312	1.36912e-09	-0.691384	5.43957e-32	-0.699216	9.38024e-33
107887357	8.76333	12.88	8.01	4.75333	0.553504	2.58869e-19	-0.126433	0.0386769	-0.874953	6.28519e-29
107887358	4.63	4.67667	4.03	3.33	0.0181029	0.352448	-0.197918	0.0165518	-0.488941	1.07046e-07
107887359	2.49	2.27333	1.86333	1.27	-0.0754866	0.274252	-0.42104	0.00361574	-0.997721	1.20403e-09
107887360	0.09	0.0633333	0.0366667	0.12	-0.526478	0.226268	-1.30847	0.0601875	0.407995	0.156509
107887361	0.486667	0.63	0.41	0.14	0.438656	0.0762141	-0.162568	0.255557	-1.67923	2.39227e-05
107887362	0.496667	0.43	0.393333	1.07333	-0.209179	0.268491	-0.32832	0.180082	1.105	0.000113969
107887363	1.02667	1.26	0.96	0.89	0.275022	0.0678262	-0.0971868	0.25133	-0.239622	0.0696747
107887364	1.95333	2.04667	1.90333	1.43333	0.0609454	0.310524	-0.0408122	0.316362	-0.450894	0.00390485
107887365	414.97	246.977	287.193	325.953	-0.752297	0	-0.533054	4.28309e-176	-0.347994	1.16533e-80
107887366	4.02667	3.83667	1.40333	6.52	-0.0552813	0.31995	-1.50638	2.56724e-13	0.708983	2.35911e-07
107887367	0.616667	0.64	0.403333	0.186667	0.0638918	0.332752	-0.602712	0.00889682	-1.71811	3.84029e-09
107887368	0.81	0.866667	0.77	0.906667	0.103668	0.277865	-0.0652602	0.30163	0.163001	0.131376
107887369	0.2	0.153333	0.11	0.146667	-0.397378	0.209904	-0.868915	0.0573054	-0.431921	0.123952
107887371	47.14	41.8	37.5267	28.1767	-0.178305	9.6415e-09	-0.334018	5.87559e-26	-0.740957	4.20723e-106
107887372	1.78667	5.91667	2.35333	1.90667	1.72142	5.13007e-82	0.399901	0.000341619	0.0882968	0.14523
107887374	0.313333	0.423333	1.24667	2.26333	0.430379	0.161994	1.98746	5.39349e-10	2.84828	2.85066e-25
107887375	2.47667	1.98333	1.89667	1.03	-0.298674	0.00654958	-0.350773	0.00152915	-1.24771	4.29658e-21
107887376	2.26667	2.78667	2.42667	1.66	0.308988	0.0284397	0.100741	0.226492	-0.445985	0.00411584
107887377	1.51	1.71333	0	0	0.143447	0.240779	-7.47438	6.91195e-21	-7.45836	4.06529e-21
107887378	28.7933	21.0967	13.9133	12.4333	-0.449628	5.49341e-36	-1.05172	4.21026e-155	-1.22625	1.97852e-197
107887379	0.05	0.08	0.02	0.12	0.726807	0.235919	-1.22971	0.183728	1.32158	0.0571583
107887380	3.98667	2.66	3.11333	3.49333	-0.612811	1.77741e-08	-0.388944	0.000151347	-0.203501	0.0168948
107887381	7.81667	9.53	8.49	10.56	0.298052	0.000285187	0.133324	0.0625113	0.444521	1.79024e-08
107887383	2.72333	3.73	3.40667	3.10667	0.455225	0.000599205	0.326064	0.0108649	0.192262	0.0591032
107887384	3.76333	3.34	4.18	3.64	-0.160451	0.0646629	0.150026	0.0588209	-0.046567	0.189146
107887385	15.05	18.2767	17.1667	21.4667	0.299935	2.72338e-05	0.225233	0.00134277	0.57861	1.0156e-17
107887387	3.59333	3.7	3.33667	3.04	0.0957418	0.205937	-0.0399432	0.297085	-0.26986	0.0117154
107887388	4.79333	4.10667	2.50667	3.36	-0.23697	0.0344087	-0.950593	4.67746e-12	-0.518462	2.41046e-05
107887389	1.81333	2.27	2.30333	2.04	0.32476	0.00136694	0.346533	0.000535736	0.161393	0.0453533
107887390	1.68667	1.29333	0.826667	0.803333	-0.376981	0.01846	-1.0263	5.33926e-08	-1.07033	1.06696e-08
107887391	102.31	65.4033	53.0367	38.8167	-0.648098	9.41917e-282	-0.950145	0	-1.40105	0
107887392	4.31333	5.08667	4.74333	3.90667	0.240669	0.0021564	0.133669	0.0544005	-0.146103	0.03189
107887393	10.4067	9.73	8.93667	8.18	-0.099388	0.0305985	-0.221715	1.03316e-05	-0.367524	8.3894e-13
107887394	0.726667	0.573333	0.653333	1.01	-0.338017	0.131472	-0.151696	0.247333	0.480449	0.0202571
107887395	8.67	8.51333	7.74667	7.38667	-0.0407546	0.282696	-0.168424	0.0262639	-0.238658	0.00212329
107887396	1.46333	3.57	3.06667	3.37	1.30511	9.05717e-11	1.09072	1.49541e-07	1.22392	9.99748e-10
107887397	2.56667	4.82667	2.37	0.96	0.914267	1.32365e-29	-0.108075	0.128529	-1.41709	8.53558e-32
107887398	0.0166667	0.0466667	0.13	0.256667	1.62522	0.101503	3.05734	0.000808983	4.07593	1.09312e-07
107887399	5.9	5.64333	4.95	2.79	-0.0526679	0.144741	-0.273765	2.64318e-08	-1.12862	5.96654e-88
107887400	0.64	1.09667	0.856667	0.146667	0.763403	0.00694493	0.406379	0.0965529	-2.10698	5.66099e-06
107887401	21.9833	22.2567	21.96	20.9767	0.0195905	0.317889	0.000284945	0.370516	-0.0696527	0.0740663
107887403	0.0266667	0	0	0.0266667					0.0294831	0.273235
107887404	20.14	14.7333	12.61	10.38	-0.43701	3.43539e-26	-0.653515	6.89563e-53	-0.943705	2.32237e-98
107887405	11.17	10.3833	8.42333	7.17667	-0.107426	0.107771	-0.407989	1.83734e-06	-0.638223	5.4547e-13
107887406	0.146667	0.183333	0.86	0.543333	0.2938	0.281116	2.54536	1.1115e-10	1.88869	9.9145e-06
107887407	1.17	1.17333	1.02667	2.12333	-0.00135252	0.399176	-0.195692	0.200453	0.857128	3.43889e-05
107887408	41.7333	77.7033	108.437	143.527	0.897257	6.90665e-217	1.37977	0	1.78533	0
107887409	9.39333	17.2567	15.74	14.0333	0.866038	8.37836e-32	0.734337	2.56456e-22	0.573244	1.04475e-13
107887410	3.85333	4.47	5.09333	4.78333	0.219175	0.0199483	0.408866	1.93143e-05	0.310369	0.000709521
107887411	7.05333	6.75667	6.31667	6.57333	-0.0614105	0.199695	-0.155212	0.0209642	-0.103214	0.0551696
107887412	0.473333	0.603333	0.663333	0.96	0.349396	0.174657	0.477569	0.0915741	0.993509	0.000994963
107887413	16.51	20.4033	16.72	15.29	0.29563	1.92638e-17	0.0128526	0.292998	-0.122479	0.000479608
107887414	2.9	3.66	3.39	2.99667	0.33582	9.77263e-05	0.227621	0.00639619	0.0463886	0.183675
107887415	0.123333	0.116667	0.0266667	0.193333	-0.108478	0.3569	-2.20893	0.00444151	0.68156	0.0581498
107887417	7.14	6.71667	6.15667	6.08	-0.0871912	0.187668	-0.211857	0.0193935	-0.232365	0.00770486
107887418	21.6	22.8233	23.6433	23.0167	0.0860263	0.112335	0.137719	0.0223886	0.0965217	0.0521561
107887420	4.32333	4.40667	5.12667	4.78667	0.0277681	0.338918	0.223346	0.0163045	0.138597	0.0608332
107887421	0	0	0	0.01
107887423	0.08	0.416667	0.156667	0.05	2.45498	1.14525e-07	1.0375	0.0439167	-0.556315	0.148316
107887425	4.91667	3.39333	3.88333	2.15333	-0.528134	2.34839e-06	-0.333594	0.00142692	-1.16831	3.50315e-21
107887426	3.40333	2.96	3.91333	3.26333	-0.201696	0.116131	0.10571	0.212959	-0.0682207	0.19689
107887428	0.88	0.143333	0.623333	0.13	-2.54938	1.05862e-15	-0.438839	0.0272229	-2.70585	5.89434e-17
107887429	0.863333	0.94	0.9	0.423333	0.124527	0.148192	0.0603625	0.252769	-1.03197	7.21977e-14
107887430	5.75	6.91667	6.14667	5.17667	0.25557	0.000449736	0.0577034	0.19939	-0.176335	0.010168
107887431	0.493333	2.65667	1.10667	0.623333	2.45476	1.41364e-31	1.16787	7.94921e-06	0.342871	0.0870794
107887432	5.95333	6.83667	5.39333	4.55	0.204248	0.00178391	-0.137701	0.0294359	-0.385924	8.05793e-08
107887433	9.13333	11.6167	9.38333	6.81333	0.351944	1.13016e-09	0.0441594	0.206909	-0.416155	1.38811e-10
107887434	0.653333	0.283333	0.05	0.2	-1.33468	1.89548e-07	-3.6696	6.66088e-22	-1.7571	8.66629e-11
107887435	49.5667	52.9367	42.8233	50.3067	0.0963651	0.00452958	-0.207458	1.42665e-08	0.0222817	0.162609
107887436	18.39	20.1667	12.01	10.0267	0.131895	0.00674547	-0.615711	2.8987e-27	-0.875391	3.1304e-49
107887438	1.32	4.91667	6.89	13.7167	1.92334	2.29701e-63	2.4193	1.12568e-117	3.4035	0
107887439	6.79667	7.09	6.58333	5.7	0.0634415	0.161452	-0.0411702	0.223269	-0.248504	6.6101e-05
107887440	0.29	0.433333	0.52	0.5	0.568934	0.0810095	0.845197	0.0124745	0.778113	0.0132643
107887441	9.04667	11.22	14.4667	15.6	0.312305	9.99024e-06	0.640744	5.59918e-22	0.72022	2.75573e-28
107887442	1.53	1.57333	1.81	1.94333	0.0428101	0.331824	0.248389	0.0417819	0.346329	0.0047207
107887443	6.18333	5.19667	6.53667	6.54667	-0.247469	0.00638365	0.0853096	0.15627	0.0901584	0.101061
107887444	0.65	0.3	0.233333	0.356667	-1.11916	0.00081114	-1.49631	2.70728e-05	-0.868049	0.00304679
107887445	6.8	10.0833	9.15	9.57667	0.556651	2.59068e-29	0.420826	1.15748e-16	0.485647	2.27397e-22
107887446	0.12	0.373333	0.246667	0.416667	1.65523	0.00254706	1.04013	0.0515625	1.80329	0.000421241
107887447	13.5967	13.5533	16.63	21.7467	-0.0063357	0.379893	0.291106	1.78052e-06	0.684666	2.0516e-33
107887448	9.70667	12.31	10.86	11.7967	0.336284	9.16032e-13	0.157113	0.000874273	0.279331	2.12912e-09
107887449	10.6567	20.9867	38.1167	26.09	0.979897	2.59329e-53	1.84504	8.50737e-250	1.30594	2.3456e-104
107887450	16.2233	14.16	14.7467	12.8967	-0.19909	5.61477e-05	-0.140957	0.00277745	-0.333061	2.59653e-11
107887452	11.9267	10.2867	5.93	2.95667	-0.217278	8.48391e-05	-1.01122	8.69372e-58	-2.00797	2.11241e-158
107887453	6.93333	11.7867	7.44333	2.85333	0.766696	4.56411e-39	0.105147	0.0601875	-1.27564	7.82659e-53
107887454	0.39	0.653333	0.193333	0.213333	0.769657	0.00374715	-0.957781	0.00591491	-0.848648	0.00735498
107887455	3.25	4.18667	4.44667	5.15667	0.368679	0.000392913	0.453709	9.20395e-06	0.669989	8.29123e-12
107887458	1.06333	1.44333	1.07333	1.41	0.439253	0.00076457	0.0163035	0.348807	0.399849	0.00113334
107887459	2.97667	2.79	2.4	1.81333	-0.0876579	0.189609	-0.302225	0.00212325	-0.715018	3.52979e-11
107887460	1.59333	0.343333	0.43	1.10667	-2.20792	1.71141e-14	-1.89401	3.23453e-12	-0.523152	0.00606005
107887463	0.99	1.10333	1.02	0.883333	0.159096	0.157096	0.0436036	0.30955	-0.16482	0.100545
107887465	0.813333	1	0.983333	0.88	0.297306	0.031676	0.278643	0.0361944	0.110812	0.148072
107887466	1.99	2.19	1.88667	1.12667	0.143803	0.180228	-0.0681061	0.275049	-0.82598	2.82612e-06
107887467	66.66	41.8067	53.8067	61.2267	-0.674724	1.73958e-68	-0.311791	1.21845e-17	-0.119661	0.000326127
107887472	1.71667	2.19667	0.243333	0.51	0.401399	0.00368658	-2.75135	1.01269e-29	-1.72257	1.69881e-17
107887473	0.493333	0.253333	0.456667	0.843333	-0.928813	0.019528	-0.091632	0.316604	0.78445	0.00503739
107887476	2.08	2.68	3.48333	4.25333	0.363752	0.015919	0.74916	4.03317e-07	1.0367	1.16101e-13
107887478	0.183333	2.09667	0.27	0.423333	3.5235	2.14691e-43	0.578308	0.0901602	1.21941	0.000645114
107887479	6.57333	6.27667	5.44	6.34333	-0.0674197	0.267306	-0.272226	0.0179957	-0.0499342	0.201
107887480	11.4833	7.47667	8.67333	8.58667	-0.618023	1.63431e-10	-0.404322	1.14096e-05	-0.415609	4.03333e-06
107887482	0	0.0266667	0	0.0266667
107887483	0.15	0.15	0.183333	0.163333	-0.035191	0.381649	0.275419	0.201555	0.084482	0.236652
107887484	1.16667	1.76667	1.45	0.72	0.585233	8.71272e-05	0.303525	0.0307534	-0.715761	6.31212e-05
107887485	1.44333	1.59333	1.22333	1.24333	0.142344	0.29952	-0.231667	0.223717	-0.201385	0.173153
107887486	0.04	0.153333	0.06	0.103333	1.89374	0.0471686	0.569276	0.274724	1.35141	0.0824488
107887487	0.03	0	0.0133333	0			-1.14537	0.206473
107887489	0.0266667	0.0533333	0.04	0.02	0.922803	0.231312	0.634172	0.266489	-0.476253	0.224324
107887490	0.0233333	0.0433333	0.0566667	0.05	0.74964	0.214192	1.18029	0.0934342	0.941399	0.101707
107887491	0.343333	0.336667	0.106667	0.583333	-0.0222714	0.383083	-1.69747	1.10804e-06	0.770828	0.000337901
107887492	0.173333	0	0.466667	0.113333	-4.16184	0.00293374	1.38613	0.00724249	-0.637657	0.130818
107887493	7.83667	6.32333	7.15333	4.22667	-0.307158	0.00137929	-0.128346	0.0890731	-0.892979	5.81529e-17
107887494	17.0733	14.37	14.42	13.7767	-0.242675	1.33401e-15	-0.235307	7.35174e-15	-0.308437	4.20751e-24
107887495	56.6367	45.4733	33.2567	17.38	-0.303755	1.27972e-08	-0.75199	1.75838e-39	-1.69444	1.51041e-140
107887496	8.38333	7.25	6.51	9	-0.214163	0.0216639	-0.369416	0.000223336	0.0998579	0.0956406
107887497	0.02	0.01	0.01	0.01	-1.00156	0.263839	-0.98654	0.242531	-0.970517	0.174815
107887498	8.5	13.9767	14.03	6.53	0.720561	4.12644e-23	0.733541	4.7029e-24	-0.377625	9.24258e-06
107887499	0.03	0	0.0333333	0.0933333			0.214694	0.33136	1.71071	0.0188126
107887501	2.13667	4.74	4.20333	3.52333	1.15154	1.07096e-56	0.983765	1.98716e-39	0.724084	1.85127e-20
107887502	0.05	0.313333	0	0.38	2.5967	0.0282451			2.83684	0.00809272
107887504	0.476667	0.53	0.536667	0.97	0.173531	0.238379	0.191003	0.201174	1.04486	9.26637e-07
107887505	0.06	0.146667	0.04	0.04	1.30392	0.0356863	-0.571503	0.233379	-0.555479	0.168978
107887506	4.62333	5.23667	5.58667	5.12333	0.199776	0.0204106	0.295725	0.000742992	0.167855	0.0253307
107887507	1.05333	1.40333	1.14667	1.33333	0.419281	0.055128	0.125353	0.261489	0.342073	0.0587073
107887508	40.3767	43.13	35.9533	31.7567	0.0965114	0.000170045	-0.164303	1.01252e-09	-0.343299	1.66064e-35
107887510	0.0233333	0	0	0.00666667					-1.55548	0.105268
107887511	0.146667	2.92333	1.32	2.48667	4.28454	1.16489e-54	3.14949	8.08956e-21	4.06433	7.60782e-46
107887513	1.98333	1.39	1.06333	0.926667	-0.498095	0.0425167	-0.884156	0.00156262	-1.07585	0.000146102
107887514	4.63333	5.48	6.05	4.43667	0.236893	0.0479005	0.378266	0.0024413	-0.0700755	0.185529
107887515	0.0833333	0.18	0.0666667	0.0766667	1.07019	0.133839	-0.346777	0.306158	-0.205223	0.244724
107887516	0.0933333	0.0333333	0	0	-1.55	0.0972614	-3.53498	0.0157223	-3.51895	0.0102061
107887517	5.72333	6.37	6.23333	6.80667	0.15648	0.0615975	0.126398	0.0939435	0.247129	0.00339841
107887518	18.0967	18.69	16.7133	15.65	0.0459757	0.0978601	-0.113804	0.000675119	-0.210048	9.32014e-10
107887519	0	0	0.0566667	0.12
107887520	0.01	0	0	0
107887521	2.52667	2.68667	2.13667	1.77667	0.0810586	0.206134	-0.249783	0.0107944	-0.517917	1.17738e-06
107887522	5.32333	4.8	4.05667	3.29667	-0.147184	0.0114772	-0.391067	6.20067e-10	-0.691594	1.56878e-25
107887523	7.82667	7.38667	7.37667	7.02667	-0.0740925	0.0988948	-0.0729274	0.0905665	-0.14654	0.00312765
107887527	9.81667	9.86	6.99333	4.39	0.0215954	0.352918	-0.471132	2.49872e-05	-1.14731	7.88459e-20
107887528	0.0366667	0.0866667	0.0833333	0.236667	1.22551	0.237496	1.19788	0.220415	2.70191	0.0194015
107887530	0	0.05	0.0333333	0.126667					3.9874	0.0028309
107887534	0.556667	0.52	0.496667	0.39	-0.0967198	0.327447	-0.148812	0.263037	-0.525106	0.0407643
107887535	0.03	0	0	0.0266667					-0.0681277	0.27139
107887536	0.0333333	0.113333	0.0333333	0	1.7469	0.13892	0.0134597	0.370261
107887537	7.41	14.28	8.79	9.31333	0.954798	1.39455e-18	0.259219	0.0206444	0.341337	0.00202253
107887538	0	0	0	0.0133333
107887539	1.97667	2.67	2.42333	6.89667	0.444898	0.0270679	0.305802	0.0861262	1.79701	3.1746e-26
107887540	1.11667	1.77667	1.33667	0.74	0.66387	0.00147937	0.255559	0.126807	-0.6074	0.00855486
107887541	1.76667	1.31	1.27333	1.30333	-0.4166	0.14237	-0.456026	0.110719	-0.440002	0.0806653
107887542	7.94667	6.57	5.55	6.16	-0.272663	0.00438311	-0.515615	4.12302e-07	-0.371164	9.40774e-05
107887544	13.7533	13.54	13.6767	17.2433	-0.019789	0.296304	-0.00301616	0.359868	0.327108	5.84789e-15
107887548	0.0266667	0	0	0
107887550	0.203333	0.443333	0.453333	0.136667	1.10685	0.000257706	1.13827	0.000134016	-0.604153	0.0496919
107887551	0.416667	0.286667	0.443333	0.353333	-0.56979	0.0824924	0.0691537	0.328721	-0.261151	0.147944
107887552	0.61	0.503333	0.64	0.43	-0.28361	0.179353	0.0651454	0.321952	-0.497129	0.0405805
107887555	0.186667	0.186667	0.22	0.113333	-0.00156253	0.399176	0.206105	0.311669	-0.777872	0.123929
107887556	2.19333	2.14667	0.763333	0.623333	-0.0512539	0.352351	-1.55075	8.02094e-07	-1.83914	1.61569e-08
107887558	0	0	0.03	0.03
107887559	0	0.01	0	0
107887561	0.266667	0.603333	0.913333	2.39667	1.18795	0.00266655	1.77527	9.4282e-07	3.16149	9.20007e-29
107887562	0.813333	0.25	0.606667	2.29667	-1.67963	0.0115636	-0.401578	0.20783	1.52134	6.4218e-05
107887563	0.52	0.686667	0.543333	0.446667	0.393831	0.159969	0.0665441	0.337207	-0.221339	0.181516
107887564	5.98667	6.51667	4.59333	3.47333	0.119304	0.0148358	-0.385423	5.94609e-12	-0.788261	9.12016e-40
107887565	0.09	0.0966667	0.0566667	0.08	0.0330014	0.384044	-0.721814	0.0643485	-0.227358	0.179597
107887566	0	0	0	0.00666667
107887567	7.59667	7.23333	7.35667	5.97333	-0.0664516	0.140649	-0.0405568	0.214418	-0.34115	1.68431e-08
107887568	9.22333	9.45	9.62667	8.65667	0.0384227	0.140927	0.0664472	0.0290372	-0.0914831	0.00360607
107887570	0.143333	0.08	0.17	0.123333	-0.841405	0.176133	0.253269	0.294119	-0.20235	0.230329
107887572	0	0	0.0966667	0.05
107887573	0.03	0	0	0
107887575	10.9833	14.3	10.38	6.3	0.376838	1.29387e-14	-0.0846454	0.059136	-0.807915	6.28844e-42
107887577	0	0.0333333	0.02	0.103333					4.20261	0.00131176
107887578	0.523333	0.353333	0.306667	0.27	-0.578118	0.0181227	-0.78964	0.00226085	-0.957925	0.000240233
107887579	4.38667	3.77333	4.58	4.59667	-0.210385	0.0451573	0.0656846	0.237268	0.067451	0.166484
107887582	0.273333	0.356667	0.38	0.176667	0.361008	0.23563	0.454032	0.172722	-0.607947	0.105966
107887585	0.0166667	0	0.0166667	0			0.0134597	0.370261
107887586	0.54	0.433333	0.41	0.833333	-0.283386	0.275862	-0.352925	0.225482	0.649282	0.0555742
107887592	2.09	2.36333	3.58	5.78333	0.183051	0.116364	0.787184	1.47961e-09	1.46821	2.85513e-37
107887593	3.93	4.19333	3.45	2.57333	0.093433	0.116761	-0.186621	0.0104478	-0.614974	1.12597e-13
107887594	0.6	1.68	0.53	0.94	1.49023	2.04637e-05	-0.160852	0.294518	0.659977	0.0370968
107887598	0	0.09	0	0.163333
107887600	0.0833333	0.07	0.05	0	-0.327201	0.341898	-0.775485	0.244577
107887602	2.31667	2.00333	1.64333	1.75667	-0.195339	0.20729	-0.480953	0.0323352	-0.384356	0.0432366
107887603	0.0533333	0	0.0266667	0			-0.98654	0.242531
107887604	12.67	48.8867	40.6633	51.28	1.94058	6.32362e-271	1.68289	6.28905e-186	2.01125	1.25149e-295
107887607	4.85333	4.24667	3.84667	3.51667	-0.192685	0.028104	-0.332597	0.000437885	-0.466517	1.23094e-06
107887609	0.0733333	0	0	0.0266667	-3.84755	0.00820264	-3.83253	0.00705941	-1.34142	0.0590499
107887610	0.516667	0.406667	0.406667	0.233333	-0.365387	0.23342	-0.355508	0.216124	-1.12714	0.0216763
107887611	0.0966667	0.05	0.0333333	0.0966667	-0.967515	0.162737	-1.51658	0.0762913	-0.0411216	0.268403
107887612	6.15	9.27333	9.60333	9.21333	0.569102	1.20367e-14	0.631268	3.92753e-18	0.579063	1.83109e-15
107887615	0	0	0.0333333	0.0666667
107887616	0	0.0433333	0.0433333	0
107887619	0	0	0.02	0
107887622	0.21	0.4	0.336667	0.853333	0.935282	0.00949809	0.682642	0.0451633	2.01822	4.33721e-11
107887623	7.56333	6.66	7.03333	5.98	-0.188224	0.0403923	-0.109092	0.131412	-0.338439	0.000477127
107887625	0.00666667	0.00666667	0.00666667	0.0166667	-0.00156253	0.399176	0.0134597	0.370261	1.02948	0.169045
107887626	0	0.01	0.01	0
107887627	0	0.01	0	0
107887628	0	0.02	0	0
107887629	23.25	19.78	20.45	36.49	-0.248099	0.00413846	-0.202346	0.0133515	0.644112	1.10361e-17
107887632	8.77333	9.16	9.28667	7.42667	0.0620744	0.150373	0.0834518	0.0758727	-0.240289	3.48063e-05
107887638	3.86	4.08667	6.33	8.63	0.0823387	0.276765	0.711904	4.6599e-07	1.15753	6.11791e-19
107887642	1.61	2.23	1.58333	1.33333	0.479572	7.40629e-06	-0.0217091	0.332268	-0.266453	0.0111923
107887643	0.05	0.0333333	0	0	-0.558328	0.314024
107887644	0	0.0333333	0.0166667	0.0333333
107887645	0.02	0	0.106667	0.07			2.51326	0.00660041	1.87025	0.0318147
107887646	1.13333	1.20333	1.22	1.29333	0.073986	0.336942	0.0965137	0.290894	0.181957	0.152522
107887652	0.136667	0.36	0.183333	0.23	1.41347	0.0792609	0.428497	0.285022	0.766449	0.145786
107887653	51.3867	41.14	36.8967	37.5333	-0.325798	3.97672e-23	-0.482354	1.41813e-46	-0.449904	2.89139e-41
107887654	0.0133333	0.06	0.04	0	2.18826	0.194354	1.65732	0.23542
107887656	0	0	0	0.00666667
107887657	0.06	0.15	0.06	0	1.32471	0.140115	0.0206912	0.370261
107887659	0.05	0.153333	0.126667	0.13	1.65897	0.00418353	1.37917	0.0164432	1.39926	0.0096044
107887661	0.0333333	0.0333333	0	0	-0.00156253	0.399176
107887663	0.0333333	0	0.0666667	0.0366667			1.02796	0.238426	0.194542	0.260179
107887670	2.52333	1.83	1.75	0.846667	-0.480371	0.000359945	-0.545699	5.50906e-05	-1.58457	2.04094e-22
107887671	0	0.0733333	0.0366667	0.0733333
107887673	0.07	0	0.0266667	0.09	-4.01592	0.00486773	-1.30046	0.0805143	0.376896	0.176267
107887674	1.08667	2.27667	3.69667	1.61	1.06996	0.00714384	1.76801	1.03726e-06	0.557349	0.0731841
107887675	8.23667	7.31667	9.69333	9.57	-0.1578	0.0490572	0.232815	0.00351925	0.227519	0.00267856
107887676	0	0.00666667	0	0.0133333
107887677	0.983333	1.06667	1.20667	1.5	0.125648	0.258882	0.302585	0.0728718	0.622955	0.000566232
107887678	1.75333	1.50667	1.46333	1.81333	-0.223289	0.208063	-0.264466	0.15888	0.0430582	0.247581
107887681	0.0133333	0.0133333	0.0566667	0.0133333	-0.00156253	0.399176	2.01346	0.0868902	0.0294831	0.273235
107887683	1.38333	1.11	1.93	1.63333	-0.280839	0.118549	0.51705	0.00543372	0.250408	0.0753732
107887684	0.0666667	0.0266667	0.09	0.0766667	-1.32349	0.139938	0.498886	0.239047	0.263371	0.22274
107887685	0	0	0	0.01
107887687	0	0	0.0133333	0
107887689	0.103333	0.113333	0.113333	0.00666667	0.116994	0.374559	0.128937	0.344895	-4.08155	0.0168373
107887690	0	0.0166667	0	0
107887692	3.64333	4.23667	3.63333	2.78	0.221402	0.00904833	0.000704205	0.370261	-0.381905	4.46278e-05
107887693	5.72	9.59333	12.6333	10.2633	0.745979	1.63461e-12	1.14701	1.02555e-31	0.8444	1.92718e-16
107887694	17.6967	14.2367	14.8967	16.56	-0.315679	1.1731e-07	-0.25044	1.6723e-05	-0.100437	0.0292788
107887696	0.33	0.396667	0.273333	0.11	0.253367	0.276595	-0.284636	0.250406	-1.56678	0.00756864
107887698	0.17	0.1	0.223333	0.366667	-0.746803	0.079229	0.44145	0.132083	1.14647	0.000588607
107887700	0.433333	0.153333	0.323333	0.13	-1.49166	4.15085e-05	-0.410439	0.0891827	-1.68313	3.89533e-06
107887701	152.623	120.313	134.34	138.077	-0.343559	2.5796e-106	-0.184422	3.01437e-33	-0.148955	1.20115e-22
107887702	0.07	0.126667	0.12	0.11	0.834362	0.24424	0.783231	0.233371	0.590198	0.195442
107887703	0.816667	0.796667	0.88	0.933333	-0.0457496	0.36045	0.103169	0.27932	0.190076	0.140055
107887704	3.67333	5.03667	5.18	3.33	0.453704	0.000332565	0.495411	7.00988e-05	-0.143189	0.102071
107887706	0	0	0.0133333	0
107887708	0.136667	0.163333	0.13	0.0633333	0.279778	0.269169	-0.03499	0.360352	-1.08346	0.0337214
107887709	0	0.03	0	0
107887710	0	0	0	0.146667
107887711	0	0.0166667	0.00666667	0
107887713	0.136667	0.04	0.0466667	0.0133333	-1.74141	0.0331665	-1.55433	0.0395223	-3.29533	0.00193674
107887714	0.0133333	0	0	0
107887717	0	0	0.0533333	0
107887718	45.9	43.9367	46.67	40.1367	-0.0573824	0.0481672	0.028325	0.171298	-0.188178	5.96879e-09
107887725	0	0.02	0	0
107887726	0	0.02	0	0
107887727	0.59	0.79	0.98	1.02333	0.437024	0.00430145	0.748928	4.12302e-07	0.797369	3.29414e-08
107887729	0.0433333	0.0433333	0.0866667	0.0866667	-0.00156253	0.399176	0.986765	0.154064	1.01498	0.102756
107887731	0.216667	0.126667	0.216667	0.22	-0.819553	0.163004	-0.0262046	0.366618	-0.00182733	0.275261
107887732	0.206667	0.263333	0.153333	0.1	0.369128	0.107471	-0.410078	0.101154	-1.02012	0.00181739
107887734	2.65333	6.2	4.46333	5.09667	1.2216	8.62487e-27	0.753395	1.15378e-09	0.934632	3.94072e-15
107887736	0.0533333	0.0266667	0.0466667	0.06	-0.779771	0.256215	-0.199152	0.335689	0.251275	0.234525
107887739	0.793333	0.8	1.11	0.34	0.0246658	0.385161	0.496818	0.0520205	-1.24745	0.000866026
107887741	26.7333	22.2667	20.9467	14.4467	-0.2613	2.55857e-06	-0.349988	4.67232e-10	-0.887595	1.81443e-47
107887742	4.31	2.85333	2.93	1.99667	-0.590037	1.79589e-06	-0.547441	6.54163e-06	-1.09595	1.96298e-16
107887743	0.333333	0.46	0.46	0.44	0.445896	0.21746	0.460919	0.191146	0.377406	0.160514
107887744	6.07333	8.75333	6.70333	4.75667	0.526542	8.49484e-06	0.14466	0.123016	-0.349629	0.00454354
107887748	0.246667	0.0433333	0	0.256667	-2.46289	0.00212937	-4.91254	6.5445e-05	0.0370563	0.264984
107887749	1.36	1.79667	1.07667	0.423333	0.398876	0.0658581	-0.332903	0.116216	-1.65959	1.33218e-06
107887753	1.52667	1.37333	2.00333	1.59333	-0.119736	0.247652	0.415004	0.00928886	0.0472069	0.2294
107887754	0.256667	0.193333	0.163333	0.183333	-0.433915	0.115558	-0.64577	0.0388913	-0.541876	0.0430372
107887755	0.00666667	0.0666667	0.0566667	1.17667	2.93954	0.0597468	2.75331	0.0691422	7.15588	1.78658e-17
107887756	0.11	0.13	0.196667	0.0666667	0.201729	0.322741	0.823255	0.068715	-0.768369	0.094176
107887757	0.06	0.14	0.383333	0.106667	1.24071	0.0964296	2.69732	8.31178e-05	0.838015	0.122877
107887758	57.8867	50.5933	32.4933	19.8433	-0.202358	0.000102583	-0.842187	8.10394e-48	-1.54171	3.18549e-123
107887759	13.4233	14.2733	10.4	8.55	0.0850971	0.00740461	-0.371602	8.79468e-26	-0.651178	2.71363e-69
107887760	0.02	0.0466667	0	0	1.16194	0.285629
107887763	0.02	0.0466667	0	0	1.16194	0.285629
107887766	5.02	5.1	5.31667	4.71667	0.0256087	0.366291	0.0875875	0.251028	-0.0896354	0.180764
107887767	0.03	0.153333	0.03	0.126667	2.32314	0.0554679	-0.000479527	0.371444	2.00852	0.0567684
107887768	0.1	0.1	0.0666667	0.24	-0.00156253	0.399176	-0.571503	0.273846	1.25188	0.0668544
107887769	0.196667	0.226667	0.403333	0.47	0.162686	0.360434	1.01795	0.100348	1.23593	0.0382356
107887770	116.323	84.8467	90.73	71.19	-0.462913	2.35988e-73	-0.367157	4.40817e-48	-0.70183	6.14937e-153
107887771	0.44	0.926667	1.12	4.2	1.07103	0.00128076	1.34659	2.2904e-05	3.25341	9.24619e-46
107887772	0.893333	1.10667	0.413333	0.38	0.331801	0.0733985	-1.08984	5.47736e-05	-1.22102	6.36191e-06
107887774	0	0.03	0	0.03
107887775	6.38333	7.67333	6.47	5.73667	0.264452	1.40218e-15	0.0193728	0.243956	-0.152853	8.61768e-06
107887777	0.11	0.143333	0.106667	0.143333	0.413475	0.275718	0.0134597	0.370261	0.444521	0.173723
107887779	2.80333	3.05333	2.72	1.52667	0.133912	0.207807	-0.0449019	0.313642	-0.88394	3.46391e-06
107887780	0.813333	0.443333	0.24	0.313333	-0.890549	1.00044e-06	-1.77595	4.0894e-17	-1.37065	2.01018e-12
107887781	5.59	5.73	5.5	4.50333	0.0420612	0.274298	-0.0158861	0.329454	-0.30828	0.000118787
107887782	0.58	0.23	0.933333	0.826667	-1.32349	0.0670331	0.691532	0.11587	0.51491	0.125266
107887783	0.0733333	0.11	0.146667	0	0.5834	0.296304	1.01346	0.185848
107887784	3.18667	3.78	3.68	4.23333	0.244481	0.0369608	0.208339	0.0569809	0.414401	0.000383304
107887787	0.486667	0.79	0.296667	0.323333	0.692313	0.0402645	-0.719042	0.0679558	-0.579589	0.0714773
107887788	0	0	0.0133333	0
107887789	0	0.0233333	0.136667	0.0166667			3.59842	0.0137915
107887792	0.516667	1.08	0.993333	0.766667	1.0662	0.00224712	0.951953	0.00568286	0.572685	0.0492193
107887796	1.91667	1.88	2.10667	2.75	-0.0347944	0.342052	0.12877	0.156095	0.507287	2.29379e-05
107887798	0	0	0	0.0933333
107887799	0.0466667	0.11	0	0	1.2132	0.129854
107887800	0.0133333	0.0266667	0	0	0.998437	0.263839
107887802	0	0.01	0.02	0
107887804	3.87333	4.75	2.78	2.75667	0.291932	0.0108569	-0.477051	0.000357422	-0.486503	0.000172117
107887809	0.0166667	0	0	0.0133333					0.0294831	0.273235
107887812	2.89667	2.36333	2.06	3.65667	-0.301068	0.0786965	-0.497526	0.0100425	0.333631	0.0230859
107887813	0.0333333	0.00333333	0.106667	0	-3.01439	0.184408	1.79691	0.104526
107887816	0	0	0	0.04
107887818	0.0666667	0.133333	0.156667	0.263333	1.00507	0.0687262	1.24127	0.024193	1.97039	0.000108264
107887820	0	0	0	0.0433333
107887821	7.88667	8.61333	8.58667	8.41	0.130715	0.0321563	0.129072	0.0295049	0.0944852	0.0545659
107887822	344.037	214.91	168.17	138.477	-0.674943	0	-1.0261	0	-1.31707	0
107887823	0.08	0.186667	0.233333	0.15	1.28182	0.0428728	1.61439	0.00906039	0.989638	0.061408
107887826	0.05	0.0533333	0	0	-0.00156253	0.399176
107887828	1.45	3.62333	2.76333	2.81333	1.31795	1.65722e-17	0.931191	1.69283e-08	0.950635	4.43106e-09
107887829	0	0.0133333	0	0.0133333
107887830	0	0.03	0	0
107887835	0.486667	0.5	2.52333	4.46	0.0349633	0.374841	2.37922	5.41086e-34	3.19694	1.89849e-79
107887837	0.316667	0.376667	0.436667	0.213333	0.276581	0.122721	0.488051	0.015271	-0.53103	0.0156723
107887840	0.52	0.503333	0.343333	0.976667	-0.0399326	0.381711	-0.587637	0.111663	0.906284	0.006262
107887842	0.113333	0.0566667	0.23	0	-0.997915	0.209418	1.04953	0.11287
107887843	0.49	0.84	0.856667	0.736667	0.776045	8.49814e-05	0.815308	2.76589e-05	0.591362	0.00164442
107887857	0.33	0.27	0.41	2.07	-0.264597	0.300834	0.345929	0.23299	2.69283	4.01889e-13
107887862	0.0166667	0.0333333	0.0333333	0.0466667	0.998437	0.263839	1.01346	0.239404	1.61445	0.100133
107887863	0	0.0166667	0	0
107887865	0.11	0.06	0.116667	0.0666667	-0.862601	0.0683874	0.0178293	0.366446	-0.774411	0.0517784
107887872	6.36667	7.83333	6.71	5.75333	0.29756	1.51947e-07	0.0747535	0.101964	-0.14711	0.00646422
107887875	23.3133	21.7233	25.0667	19.9667	-0.109939	0.000220538	0.0963497	0.000622962	-0.226994	5.336e-14
107887876	16.7933	14.6767	12.32	8.85333	-0.203924	0.000590212	-0.45699	2.4075e-13	-0.925771	4.76939e-43
107887878	2.09	2.52333	1.72667	1.6	0.27318	0.00537064	-0.272856	0.0089309	-0.383894	0.000312078
107887879	0	0	0	0.00666667
107887880	5.38	6.38667	4.74667	4.33	0.245927	0.00110545	-0.180959	0.0168938	-0.313917	8.91298e-05
107887881	0	0	0.02	0
107887882	22.78	20.25	21.4467	28.37	-0.16893	0.000891162	-0.084389	0.0522035	0.311128	2.51747e-11
107887884	1.32	1.75	3.97	3.04	0.398045	0.0931125	1.58815	4.41913e-12	1.18914	7.05327e-07
107887885	0	0	0.0366667	0
107887887	0.136667	0.266667	0.136667	0.03	0.94173	0.136059	-0.00832902	0.370261	-2.19394	0.0424347
107887889	0.0333333	0.0666667	0.1	0.0666667	0.998437	0.263839	1.59842	0.146706	1.02948	0.169045
107887890	0.193333	0.19	0.24	0.173333	-0.0391209	0.379984	0.300653	0.191413	-0.158026	0.206142
107887891	4.41333	4.57	5.02667	4.29667	0.0565062	0.252909	0.179883	0.0255332	-0.0139859	0.249785
107887892	0.323333	0.18	0.146667	0.286667	-0.84597	0.0878486	-1.15711	0.0348587	-0.148809	0.224547
107887895	0.76	0.64	0.32	0.416667	-0.253803	0.120022	-1.24827	2.40522e-07	-0.875967	5.64627e-05
107887896	0.02	0.02	0	0.0366667	-0.00156253	0.399176			1.02948	0.169045
107887897	0	0	0	0.13
107887898	0.266667	0.333333	0.496667	0.376667	0.297998	0.270514	0.897982	0.038609	0.498968	0.111969
107887899	14.1367	17.14	16.02	13.63	0.280842	4.97116e-09	0.18528	0.000111683	-0.0525428	0.0993867
107887900	6.54	5.97333	6.80333	4.55333	-0.128806	0.0928434	0.0590972	0.219925	-0.521038	5.07891e-08
107887903	0.05	0.0333333	0.0166667	0.07	-0.586525	0.295921	-1.5715	0.149832	0.444521	0.203544
107887906	0.413333	1.34333	1.26	1.35	1.68692	5.03965e-09	1.60603	3.34257e-08	1.69415	1.98049e-09
107887907	0.13	0.53	0.263333	0.666667	1.99844	0.0135029	1.01346	0.148145	2.35141	0.00138132
107887910	0.21	0.326667	0.17	0.213333	0.630706	0.078083	-0.308468	0.228842	0.0294831	0.266107
107887913	0.53	0.536667	0.01	0.143333	0.0332029	0.383083	-5.70363	5.93701e-08	-1.8552	0.000283687
107887914	7.37667	10.9333	10.9167	10.4933	0.573113	1.78148e-08	0.573372	1.44545e-08	0.514128	2.72495e-07
107887915	0.06	0.06	0.02	0	-0.00156253	0.399176	-1.5715	0.149832
107887918	0	0	0	0.13					3.58038	0.0092627
107887919	0.0233333	0	0	0.0433333					0.947021	0.217991
107887921	0	0	0.00666667	0
107887924	0.0266667	0.0166667	0	0	-0.699419	0.282137
107887928	0.97	2.43667	1.80667	1.51333	1.3154	7.7293e-15	0.89287	8.12425e-07	0.630587	0.000421379
107887931	0	0	0.06	0
107887932	0.0633333	0.03	0.0133333	0.0366667	-1.08936	0.164553	-2.17387	0.0515451	-0.753458	0.143921
107887935	0.146667	0.606667	0.256667	0.323333	2.06832	9.68112e-09	0.837815	0.0341892	1.15996	0.00248372
107887936	0.15	0.316667	0.166667	0.0933333	1.0852	0.127132	0.142629	0.344375	-0.660561	0.178121
107887939	69.2067	66.9067	58.39	34.0033	-0.0467909	0.0528571	-0.242655	3.00514e-18	-1.01698	1.08857e-226
107887941	1.43333	35.5833	13.2633	10.6667	4.62517	0	3.20973	3.3292e-226	2.90114	7.49728e-166
107887943	2.8	2.56667	1.62667	1.11333	-0.134088	0.176959	-0.790492	5.0619e-07	-1.33895	7.0521e-15
107887945	1.58333	1.74	1.01667	0.656667	0.135482	0.241519	-0.636227	0.00408786	-1.28238	3.86967e-07
107887947	0.0966667	0.106667	0.113333	0.413333	0.183725	0.312987	0.272748	0.243352	2.11435	9.97941e-10
107887949	9.79	9.33667	8.06	7.87333	-0.0785116	0.125019	-0.293137	1.05769e-05	-0.317043	1.29428e-06
107887950	0.806667	1.14333	0.556667	0.776667	0.497542	0.042525	-0.539835	0.0516929	-0.0555551	0.243266
107887956	0	0.0533333	0	0
107887958	0.666667	0.97	0.906667	2.14	0.575812	0.093842	0.487143	0.119021	1.71647	1.75789e-07
107887964	0	0	0	0.06
107887965	0	0.07	0	0.0733333	3.53698	0.0186109			3.5455	0.0100998
107887966	0.193333	0.25	0.396667	0.156667	0.372622	0.258459	1.03982	0.0347915	-0.329502	0.191338
107887969	0	0.03	0.03	0
107887970	0.0766667	0.06	0.156667	0.123333	-0.237925	0.330088	1.0665	0.048591	0.724517	0.0916641
107887971	0.536667	0.713333	1.86333	0.996667	0.413475	0.156873	1.80354	5.36399e-09	0.903952	0.00515777
107887973	2.34333	2.51	3.26	1.92	0.121942	0.270021	0.500472	0.0104715	-0.271212	0.0858653
107887975	0.02	0.0533333	0.0566667	0	1.5834	0.165714	1.59842	0.146706
107887985	0.11	0.11	0.413333	0.113333	-0.0322297	0.394944	1.88215	0.00280073	0.0128364	0.273247
107887986	19.3533	21.63	23.5433	22.5633	0.158689	0.000228607	0.283142	2.1029e-11	0.216825	2.15311e-07
107887989	0.0733333	0.473333	0.846667	0.496667	2.6792	0.000111183	3.51439	4.70168e-09	2.73684	3.37535e-05
107887990	0.71	0.65	0.796667	0.746667	-0.118293	0.322893	0.177278	0.252311	0.0655925	0.242642
107887993	0.02	0.02	0.02	0	0.0979731	0.3913	-0.0390078	0.370071
107887995	0	0	0.0733333	0
107887996	0.24	0.21	0.103333	0.0633333	-0.139066	0.350731	-1.12404	0.0732506	-1.84499	0.0125771
107887998	2.84333	2.93	1.00333	0.56	0.0301524	0.336486	-1.51895	6.1407e-27	-2.357	1.88866e-47
107887999	0.58	0.13	0.0766667	0.04	-2.11831	9.37223e-05	-2.90704	2.66693e-06	-3.89462	7.26112e-08
107888007	0	0	0.03	0
107888008	5.66667	1.74	0.89	0.906667	-1.72008	3.12384e-21	-2.68603	4.48816e-36	-2.65575	8.58211e-36
107888009	0.386667	1.75333	2.60333	2.66667	2.17131	3.39693e-11	2.74517	1.3188e-20	2.77803	1.69875e-21
107888011	0.0533333	0.04	0.17	0.04	-0.364133	0.283265	1.71242	0.000641886	-0.473685	0.162811
107888016	0.853333	1.19333	0.636667	1.32333	0.463804	0.0756068	-0.448085	0.103101	0.603864	0.0156821
107888020	0.0433333	0.0133333	0.136667	0.0966667	-1.58346	0.117361	1.71814	0.00996521	1.23512	0.039691
107888021	0.0533333	0.0266667	0.0533333	0	-1.00156	0.263839	0.0134597	0.370261
107888022	0	0.0133333	0	0
107888023	26.34	12.4933	18.2767	18.8	-1.06214	5.0216e-55	-0.510527	2.0655e-16	-0.474079	9.61048e-15
107888024	0.303333	0.333333	1.56	2.29	0.135941	0.351933	2.36396	5.172e-08	2.90938	1.12463e-13
107888025	0	0.0233333	0	0
107888028	2.36667	1.2	0.726667	0.793333	-0.977128	0.000664393	-1.69855	2.02902e-07	-1.55809	5.88781e-07
107888029	0	0	0	0.0266667
107888030	3.58333	4.22333	5.06667	4.69333	0.249598	0.0199928	0.515682	1.79655e-06	0.402527	0.000131286
107888034	0.266667	0.133333	0.136667	0.0266667	-1.00156	0.113036	-0.98654	0.102886	-3.29244	0.00195951
107888039	0.13	0.216667	0.133333	0.236667	0.751533	0.117837	0.0938408	0.343073	0.884395	0.0466064
107888041	0	0	0.0333333	0
107888045	0	0.08	0.0266667	0.0133333	3.5834	0.0166369
107888046	0.0733333	0.166667	0.0366667	0.25	1.14636	0.133308	-0.991341	0.213202	1.76165	0.0174602
107888047	0.04	0.103333	0.0433333	0.0433333	1.2971	0.14508	0.0490836	0.367376	0.0580523	0.270269
107888050	0.01	0	0	0.01					0.0294831	0.273235
107888052	0.0666667	0	0	0
107888058	1.07333	0.743333	0.766667	0.623333	-0.539713	0.0331157	-0.496659	0.0386914	-0.783805	0.00264049
107888060	2.37	3.01333	3.06	3.77	0.334444	0.000187052	0.358976	4.91971e-05	0.669229	1.57799e-15
107888064	0	0	0.193333	0
107888066	0	0.0433333	0.0666667	0.273333					4.13382	0.00169756
107888068	15.5067	13.5833	10.4867	8.30667	-0.194661	0.0261379	-0.568818	1.20539e-08	-0.900917	9.7118e-18
107888069	0.0466667	0	0	0
107888070	0	0.01	0	0.02
107888071	0	0.04	0	0
107888078	3.98333	2.93333	4.67	3.86333	-0.418871	0.000102332	0.183238	0.0343132	-0.079776	0.137194
107888080	0	0	0.01	0
107888086	0	0.0333333	0.05	0.0166667
107888087	0.0666667	0.13	0.18	0.17	0.998437	0.138025	1.45042	0.0406201	1.35141	0.0362436
107888089	34.5767	26.5967	28.1867	34.2567	-0.380512	5.72825e-08	-0.295425	1.49509e-05	-0.0042521	0.265906
107888090	0.0333333	0.103333	0.02	0.17	1.5834	0.0522368	-0.571503	0.273846	2.35141	0.00138132
107888106	0.17	0.226667	0.306667	0.253333	0.455539	0.206809	0.865246	0.0522275	0.584461	0.0943753
107888109	0.196667	0.193333	0.18	0.266667	0.041426	0.392312	-0.0823795	0.354515	0.466175	0.174815
107888111	0	0	0	0.03
107888113	0.0133333	0.4	1.52667	0.343333	4.83209	9.48016e-08	6.7787	4.29328e-26	4.60347	4.8831e-07
107888114	0.11	0.183333	0.12	0.14	0.733087	0.0920101	0.156527	0.311401	0.346079	0.163767
107888117	0.0233333	0.0533333	0.01	0.0466667	1.2364	0.139508	-1.06793	0.222281	1.04161	0.114866
107888121	0	0	0	0.0166667
107888122	0	0	0	0.0166667
107888124	4.8	5.47667	5.18	3.82667	0.185191	0.132791	0.121496	0.199374	-0.326764	0.0220465
107888126	0.146667	0.08	0	0.11	-0.838833	0.208308	-3.40877	0.0210583	-0.39275	0.202004
107888133	0.716667	1.21	0.813333	0.7	0.762232	0.00656918	0.186908	0.239299	-0.0183823	0.267587
107888134	0.85	0.52	1.56667	2.42	-0.712056	0.112448	0.887929	0.0205538	1.50341	3.20451e-05
107888135	0.416667	0.503333	0.37	1.42667	0.287944	0.296937	-0.156465	0.324054	1.81375	0.000153716
107888140	0.113333	0	0	0.0533333					-1.23047	0.0994403
107888143	0.01	0.0666667	0.0266667	0.0266667	2.5251	0.0383747	1.19445	0.210165	1.09919	0.160513
107888144	0.87	1.53	1.19667	1.82333	0.823351	0.00538083	0.469139	0.0767653	1.07013	0.000112711
107888145	0.19	0.786667	0.773333	0.783333	2.09642	1.32814e-05	2.08576	1.25769e-05	2.08491	7.50715e-06
107888146	0.986667	1.12333	1.47667	1.40667	0.210501	0.240119	0.608578	0.0219808	0.532624	0.0265094
107888147	3.29667	4.61667	4.16333	4.05333	0.488947	0.00294349	0.339293	0.028442	0.292275	0.0337289
107888150	0.02	0.0266667	0.0266667	0.0666667	0.5834	0.296304	0.598422	0.269294	2.02948	0.0187657
107888155	0.64	0.136667	0	0.0666667	-2.24718	0.000149707	-5.71501	1.23616e-07	-3.21872	2.42706e-06
107888156	0	0	0.0333333	0
107888160	0.846667	0.493333	0.323333	0.443333	-0.770237	0.0195737	-1.36524	0.000325857	-0.919372	0.00430732
107888162	6.83	6.79333	5.86	5.52333	-0.00907751	0.374905	-0.218475	0.00412924	-0.308282	6.63704e-05
107888164	0.0733333	2.02667	0.0166667	0.05	4.83259	3.94752e-40	-2.02553	0.0506165	-0.391981	0.197815
107888167	0	0	0	0.01
107888168	0.0633333	0.0866667	0.02	0.01	0.500938	0.292683	-1.5715	0.149832	-2.55548	0.0594557
107888171	0.64	1.07667	0.646667	1.89667	0.76293	0.00846782	0.0361121	0.3508	1.57884	7.44767e-10
107888173	5.91	6.61	6.03333	5.98667	0.169031	0.0156411	0.0413484	0.246535	0.0247082	0.217104
107888175	0.0266667	0.186667	0.08	0	2.80579	0.0197573	1.58392	0.148933
107888178	0.06	0.193333	0.196667	0.103333	1.76397	0.00761873	1.77899	0.00599382	0.851601	0.0955299
107888181	0.0566667	0	0.0733333	0.04			0.428497	0.285022	-0.555479	0.199796
107888182	0.0533333	0.0366667	0	0.0466667	-0.586525	0.295921			-0.165913	0.25303
107888184	0.206667	0.06	0.0533333	0	-1.79321	0.0333901	-2.04018	0.0196169	-4.23205	0.00106168
107888185	0	0	0.05	0.0333333
107888188	0.0133333	0	0	0
107888189	0	0	0.07	0.0466667
107888190	0.0266667	0.0233333	0.04	0.106667	-0.00156253	0.399176	0.598422	0.269294	2.09643	0.0154179
107888194	0	0.0566667	0.02	0
107888195	4.64667	4.69333	3.77333	4.22	0.00137345	0.399077	-0.313244	0.000163056	-0.149221	0.0257552
107888199	0.0433333	0.223333	0.0366667	0	2.4653	0.0116818	-0.0972438	0.361245
107888201	0.02	0.0366667	0.0166667	0	0.739519	0.28689	-0.471967	0.317461
107888202	0.02	0.103333	0.02	0.02	2.38189	0.0103047	0.0205841	0.370261	0.0294831	0.273222
107888203	11.49	9.67333	9.17667	7.76	-0.246445	0.000937884	-0.321259	2.10705e-05	-0.567025	5.65123e-13
107888205	0	0.01	0	0
107888206	0.44	0.516667	0.63	0.35	0.218089	0.249547	0.507441	0.0641351	-0.352568	0.114209
107888208	0.246667	0.533333	0.146667	0.233333	1.10742	0.00610888	-0.75216	0.0963352	-0.0746195	0.250836
107888212	0.13	0.436667	0.17	0	1.72231	0.00949421	0.350374	0.281466
107888213	0.0133333	0	0.0133333	0			0.0689548	0.36735
107888214	0	0	0.0466667	0
107888215	0	0	0.0166667	0
107888218	0	0	0.0666667	0
107888227	1.10667	1.06667	1.53	1.20667	-0.0621473	0.326728	0.479848	0.0047958	0.118864	0.163685
107888271	23.01	24.2433	25.9267	21.0833	0.0865181	0.0879113	0.185551	0.00116472	-0.114299	0.0243682
107888273	1.85667	3.13333	3.36667	3.58667	0.760058	0.00054952	0.867873	5.38574e-05	0.943132	5.62063e-06
107888275	2.73	3.09333	2.6	2.19667	0.17377	0.00740547	-0.0759238	0.134007	-0.315683	7.55028e-06
107888276	3.28667	2.97667	3.02333	1.51	-0.156568	0.165943	-0.13313	0.178861	-1.12733	5.55682e-10
107888278	0.153333	0.09	0.17	0.223333	-0.760831	0.112135	0.153571	0.303953	0.541452	0.0843012
107888279	0.136667	0.1	0.113333	0.116667	-0.438202	0.246257	-0.266742	0.279875	-0.199048	0.220935
107888281	1.36667	1.55667	2.00333	1.6	0.183677	0.139253	0.543509	0.000260183	0.223128	0.0573772
107888282	7.53	8.01333	7.54667	7.00667	0.0818921	0.0671696	-0.00745209	0.342247	-0.119945	0.00932023
107888284	5.47667	7.04	6.85333	7.13	0.366219	0.00129033	0.329001	0.00314639	0.383797	0.000382359
107888285	25.88	17.1233	18.8167	13.0233	-0.572966	2.17586e-31	-0.43885	7.26722e-20	-1.03053	3.68255e-84
107888286	3.24	2.92333	2.70667	2.69	-0.145434	0.105486	-0.253909	0.0141564	-0.268994	0.00654389
107888287	3.33333	4.27	3.88667	4.06333	0.36297	0.000138886	0.225027	0.0134464	0.29063	0.00117269
107888288	17.56	22.5233	26.02	30.9533	0.370025	3.62212e-18	0.582029	3.70028e-46	0.824691	5.23525e-99
107888290	3.76333	4.04333	2.99333	2.51333	0.0974919	0.0885175	-0.335766	3.55237e-06	-0.588669	5.77133e-15
107888291	3.25	5.88	4.27	3.14333	0.849761	1.29693e-20	0.394151	5.48774e-05	-0.0561992	0.180929
107888292	0.763333	0.646667	0.576667	0.486667	-0.256063	0.0153061	-0.397768	0.000357174	-0.670013	1.01756e-08
107888293	1.75667	2.3	2.38667	2.08333	0.393371	0.0143524	0.451227	0.00459967	0.253558	0.0503121
107888294	5.35333	6.3	5.57333	5.79333	0.230301	0.000737948	0.0551499	0.195713	0.108973	0.0434822
107888295	14.1767	12.2733	10.2967	9.89333	-0.211732	0.00168856	-0.46605	6.67304e-11	-0.521737	2.69113e-13
107888296	3.43	5.03667	3.93333	3.6	0.554867	4.33039e-08	0.201598	0.0345822	0.0685524	0.164033
107888297	3.52333	3.92667	4.96667	5.21333	0.15761	0.107938	0.522515	2.98084e-06	0.560405	2.80566e-07
107888298	8.39	7.93667	7.17667	4.95333	-0.0812838	0.130965	-0.225413	0.001011	-0.770013	1.29168e-23
107888299	4.48	4.32333	3.60667	3.43667	-0.0720003	0.165443	-0.332584	7.30629e-06	-0.379482	2.46718e-07
107888300	3.43	2.91333	1.08667	0.383333	-0.245301	0.0204886	-1.67256	1.6161e-31	-3.20165	2.43186e-66
107888301	0.05	0.116667	0.0666667	0.0166667	1.21185	0.0108697	0.399376	0.212831	-1.64333	0.0166292
107888302	8	8.24333	6.27333	5.53667	0.0374605	0.306243	-0.359935	0.000253178	-0.533551	1.2488e-07
107888304	3.81333	4.36333	5.29	3.81	0.197097	0.069483	0.478557	4.4218e-05	0.00746108	0.267161
107888305	0	0.03	0.0766667	0.24			3.34402	0.0247763	4.92575	3.89497e-05
107888307	5.05333	3.12667	3.76	3.16667	-0.683325	3.48087e-13	-0.41548	2.99999e-06	-0.68104	2.00394e-13
107888308	1.32667	3.10667	1.97	2.05667	1.23776	3.06419e-14	0.591175	0.00085691	0.648815	0.00014933
107888309	0.126667	0	0	0	-4.15537	0.00300244	-4.14035	0.00255355	-4.12432	0.00160513
107888310	2.10333	3.21667	3.27667	3.73667	0.621542	4.35052e-05	0.653643	1.30749e-05	0.830901	7.89639e-09
107888311	23.0967	25.68	25	23.23	0.162873	0.0170617	0.129059	0.0419123	0.0195943	0.228612
107888313	0.14	0.123333	0.0966667	0.07	-0.210918	0.259626	-0.50809	0.089241	-1.04965	0.00438975
107888314	4.86667	5.43667	5.35	4.29333	0.162312	0.0229795	0.128927	0.0505503	-0.196429	0.00622658
107888315	35.36	47.1967	38.54	45.19	0.427001	8.10378e-15	0.138587	0.0104478	0.367857	1.83945e-11
107888318	9.97333	8.52333	7.79333	8.05667	-0.230835	0.000371616	-0.358034	7.21393e-08	-0.311054	1.31726e-06
107888319	4.12667	4.56	5.09333	3.49	0.149402	0.110615	0.311573	0.00365557	-0.239173	0.0197588
107888320	0.926667	4.74667	2.36333	2.07	2.35063	7.67316e-22	1.3542	2.90869e-06	1.15076	6.57211e-05
107888321	0.19	0.13	0.103333	0.0533333	-0.530218	0.0941566	-0.913457	0.0147246	-1.84751	4.83039e-05
107888322	99.6867	69.4667	94.4867	130.663	-0.530581	1.35551e-63	-0.0859327	0.00244002	0.385822	1.35808e-46
107888323	22.58	34.8833	26.6933	20.5333	0.639953	2.22285e-31	0.25739	1.06135e-05	-0.126661	0.0170217
107888325	11.5367	11.9967	9.80667	12.8467	0.0608351	0.1169	-0.227362	6.34567e-06	0.156849	0.000432685
107888326	28.0333	37.1333	72.7133	61.0667	0.399829	1.4032e-19	1.36817	3.54707e-300	1.11376	5.55053e-182
107888327	1.54667	2.57333	1.66667	1.9	0.753109	7.37947e-05	0.128998	0.234017	0.321753	0.0419618
107888328	8.87	8.89333	7.55667	7.69667	0.00060947	0.399176	-0.232394	0.000176629	-0.20711	0.00043682
107888329	1.27667	1.67333	1.06333	0.103333	0.428757	0.0240005	-0.218137	0.157376	-3.56173	7.21974e-19
107888330	4.79333	3.33	4.20667	5.78	-0.523599	0.000871603	-0.184581	0.108546	0.263468	0.0216788
107888331	67.0867	68.7967	39.6267	38.8667	0.0510681	0.0365011	-0.743224	2.26785e-133	-0.774625	8.09025e-143
107888332	16.9433	16.5367	10.68	13.0333	-0.0267424	0.279865	-0.653868	4.83273e-29	-0.374503	1.16876e-11
107888333	7.14	7.45667	7.62	7.10333	0.0593855	0.23601	0.0930975	0.132979	-0.0136599	0.248814
107888334	1.35	1.63	1.79333	1.96667	0.28953	0.0936595	0.443165	0.0166436	0.547057	0.00234404
107888335	4.84333	3.85	3.55667	2.00333	-0.327896	0.0214568	-0.438969	0.00309628	-1.27343	5.31589e-13
107888336	14.5167	14.55	12.11	9.70667	0.00299639	0.388962	-0.275045	9.01455e-08	-0.622558	2.74187e-30
107888339	0.01	0.01	0	0	-0.00156253	0.399176
107888340	10.11	12.8233	12.4033	10.0567	0.355837	9.88612e-07	0.275191	0.000143227	-0.0879759	0.0876339
107888341	2.17333	3.03667	5.09	2.31667	0.488273	0.00973686	1.23145	8.80514e-13	0.0967433	0.192721
107888342	48.5933	52.8533	45.76	28.28	0.127003	0.00423347	-0.0764202	0.0567535	-0.777413	4.77345e-49
107888343	12.0467	14.79	12.1367	12.9833	0.299368	2.70124e-06	0.0172524	0.315042	0.110916	0.0335798
107888344	10.3933	9.98667	8.35	7.75667	-0.0611515	0.129403	-0.318358	2.85416e-09	-0.431385	1.78006e-15
107888345	4.49333	3.76	4.24	4.12333	-0.26071	0.00262974	-0.086743	0.147451	-0.122841	0.0542709
107888346	0.0133333	0	0	0.0266667					1.02948	0.169045
107888347	0	0.126667	0.0533333	0.08	4.23263	0.00224227			3.59508	0.0089196
107888348	0	0	0.41	0			5.78058	7.32339e-08
107888349	24.5367	25.8433	20.0733	19.18	0.0694711	0.114825	-0.295644	3.28183e-07	-0.34968	1.37048e-09
107888350	80.6967	86.9367	87.17	79.21	0.0780626	0.0145407	0.0991505	0.00209881	-0.00685268	0.24062
107888352	5.42667	22.63	27.97	32.7367	2.09367	3.75431e-126	2.37494	8.01232e-178	2.57092	6.93637e-222
107888353	0.19	0.306667	0.25	0.303333	0.707215	0.0188488	0.426866	0.10149	0.689011	0.0121947
107888354	24.1467	27.7933	29.4233	32.24	0.201621	5.87204e-05	0.286044	6.98696e-09	0.415056	5.15237e-18
107888356	8.39	7.71333	6.15	5.98667	-0.125212	0.0072717	-0.452182	6.04492e-19	-0.494632	2.80909e-22
107888357	3.72	4.40333	4.94	3.60333	0.249258	0.000293824	0.417598	4.86667e-10	-0.0437232	0.168198
107888358	4.49	5.01333	4.09667	4.71	0.156542	0.0951072	-0.132224	0.127273	0.0611717	0.178923
107888359	6.16667	5.76	5.84667	4.8	-0.0856902	0.120405	-0.085944	0.106608	-0.372988	1.45821e-07
107888360	0.453333	0.75	0.3	0.413333	0.73357	0.0173992	-0.594812	0.076684	-0.137812	0.210476
107888361	3.17	3.84667	3.95667	3.45	0.282126	0.0211544	0.326674	0.00740739	0.12301	0.115692
107888362	1.68333	1.34333	3.35	2.49667	-0.312589	0.135863	1.00098	2.90117e-06	0.585788	0.00469963
107888363	26.1933	17.04	32.59	65.74	-0.627059	3.68336e-18	0.307337	4.96514e-07	1.33201	1.51593e-150
107888364	8.30667	9.04667	7.48	5.5	0.123455	0.0407725	-0.150508	0.0182918	-0.588554	2.00145e-15
107888365	0.51	0.956667	0.866667	0.973333	0.894413	0.000817504	0.762293	0.00392042	0.930815	0.000239515
107888366	2.54667	2.38667	1.62667	0.983333	-0.09237	0.237342	-0.641521	1.24535e-05	-1.36546	2.17232e-16
107888367	5.89	8.24667	6.54333	5.16333	0.48603	2.29238e-17	0.15439	0.00720017	-0.187271	0.00158419
107888368	16.09	20.48	28.3733	20.8767	0.348315	1.94942e-17	0.817988	8.5384e-106	0.370086	6.32363e-20
107888369	6.77333	7.97	6.21333	4.23333	0.229229	7.75844e-06	-0.115886	0.019874	-0.668894	1.86364e-29
107888371	8.13333	8.13	7.62333	11.63	0.00328288	0.393023	-0.0864255	0.128155	0.516349	6.99524e-14
107888372	0.02	0.0333333	0.126667	0.16	0.998437	0.208308	2.82081	0.00123884	3.19941	6.983e-05
107888373	65.2333	68.6933	66.5933	61.1267	0.0814449	0.0102839	0.0378317	0.124659	-0.090236	0.00335673
107888374	1.03	2.96333	0.87	2.43333	1.51751	1.16073e-13	-0.243721	0.173976	1.23348	4.75536e-09
107888375	1.18	1.71	0.95	0.763333	0.538285	0.00190695	-0.309597	0.0685302	-0.629487	0.00152536
107888376	7.51667	6.34667	5.28	3.21	-0.209787	0.0272427	-0.469277	9.27704e-06	-1.1937	2.65454e-23
107888377	19.16	13.3333	10.7333	11	-0.532084	1.04209e-47	-0.845536	2.92353e-106	-0.804802	1.39571e-97
107888378	3.00667	3.74333	3.12	4.30667	0.316171	0.00177049	0.0486805	0.269294	0.483768	6.35472e-07
107888379	9.02	11.4	9.69	10.37	0.342987	2.93705e-13	0.110284	0.0148526	0.20615	8.84182e-06
107888380	3.14	2.89	2.43	1.90667	-0.127191	0.0932472	-0.3759	5.43258e-05	-0.718872	3.62252e-13
107888381	9.53667	9.79333	9.19	7.6	0.0346089	0.234611	-0.0552856	0.131622	-0.330812	2.05872e-10
107888382	18.5533	20.11	18.9233	16.6133	0.115426	0.0295099	0.0294633	0.256271	-0.158143	0.00348085
107888383	20.0867	34.9933	72.1367	66.81	0.814767	9.71172e-82	1.85801	0	1.74825	0
107888384	4.02667	5.01333	6.16333	8.06333	0.317302	0.00259738	0.619061	1.12597e-09	1.00278	2.88318e-26
107888385	6.52333	6.09333	4.36333	2.59	-0.0975434	0.135732	-0.579105	2.46432e-10	-1.3366	5.8142e-38
107888386	18.9067	21.21	15.5167	13.5733	0.161817	0.000100383	-0.287465	1.67245e-10	-0.47842	4.28791e-25
107888387	20.7067	26.3133	17.84	18.1033	0.345708	2.04433e-19	-0.214313	3.64313e-07	-0.191674	2.74236e-06
107888388	3.64667	3.00667	2.52667	1.78667	-0.285335	0.00406435	-0.537665	3.70345e-07	-1.04001	1.40254e-19
107888390	5.64	3.89667	2.70333	1.39667	-0.498776	3.29366e-09	-1.01962	8.5413e-29	-1.97907	2.48464e-75
107888391	10.5867	13.5467	10.4233	8.67667	0.351765	1.69246e-07	-0.0246255	0.294867	-0.292283	4.62561e-05
107888392	6.91333	6.70333	5.34667	4.87333	0.0959542	0.190169	-0.26433	0.013262	-0.501859	1.31955e-05
107888393	6.53667	5.99	6.50667	5.23333	-0.125181	0.0100727	-0.00456268	0.353994	-0.32265	3.84591e-10
107888395	3.35333	3.92667	3.39667	3.01	0.22661	0.0104499	0.0169623	0.334354	-0.160589	0.0373908
107888396	0.0166667	0.0433333	0.07	0.14	1.29122	0.146302	2.01346	0.0300277	3.02948	0.000222573
107888397	0.27	0.21	0	0.57	-0.391573	0.234706	-4.95186	5.15291e-05	1.03685	0.00729796
107888398	14.1	19.03	14.5933	14.8533	0.447342	1.14703e-23	0.0632837	0.0942861	0.0890282	0.0230544
107888399	2.70667	3.28667	2.76333	3.27667	0.286105	0.0325286	0.0392771	0.314738	0.282269	0.0196217
107888400	62.2333	49.1733	63.7633	66.74	-0.342194	5.21042e-38	0.0342402	0.0878296	0.106231	8.42436e-06
107888403	9.64333	8.70667	4.45333	3.66333	-0.156958	0.0103283	-1.11982	9.56415e-51	-1.40647	7.38928e-72
107888404	1.91333	2.86333	2.50667	3.41	0.581475	1.11574e-07	0.392498	0.000382602	0.828964	1.20784e-15
107888405	16.4767	16.15	17.15	19.4567	-0.0213693	0.334187	0.0664114	0.168454	0.24616	0.00024266
107888406	0.0133333	0.136667	0.14	0.0466667	3.1869	0.000228057	3.23994	0.000131879	1.66936	0.0495407
107888407	9.94333	8.89333	8.80333	8.44333	-0.161827	0.0401041	-0.177278	0.024117	-0.234502	0.00309782
107888408	2.17	2.69	1.89667	1.97667	0.305036	0.0011068	-0.197737	0.0319927	-0.136389	0.0629791
107888409	1.09333	3.65	0.77	0.706667	1.75483	1.95218e-16	-0.487291	0.0647545	-0.6058	0.0223177
107888410	1.93	2.69667	2.60667	3.70667	0.497215	0.000779844	0.451123	0.00193259	0.965401	1.30787e-12
107888411	44.5867	39.8633	61.8767	53.38	-0.157427	2.85136e-07	0.475419	1.64461e-68	0.263393	9.08538e-21
107888412	7.22667	9.34333	7.09	5.05667	0.365763	4.87952e-11	-0.0305511	0.254881	-0.520557	4.48738e-16
107888413	3.24	2.15667	3.26333	4.03667	-0.613023	0.000428347	0.0264663	0.336419	0.29659	0.0181534
107888415	30.5067	30.09	26.9567	22.93	-0.00974242	0.334846	-0.166889	1.79422e-06	-0.400514	2.94829e-28
107888416	3.20667	9.23667	5.45	7.94	1.52039	7.16787e-81	0.762658	9.07924e-17	1.30546	1.07745e-55
107888417	21.4633	24.1333	22.9067	17.4867	0.179405	3.89992e-05	0.0776818	0.0447324	-0.313305	2.34149e-11
107888418	1.64667	1.98333	1.17667	1.19667	0.269901	0.0622112	-0.483545	0.00638215	-0.437634	0.00737662
107888420	17.3467	16.99	15.3467	14.3533	-0.0352755	0.197187	-0.182556	1.22526e-05	-0.278839	3.99631e-11
107888421	0.0566667	0	0.03	0			-0.98654	0.242531
107888422	0.06	0.113333	0.143333	0.666667	0.815833	0.100678	1.16546	0.0232971	3.43154	1.17339e-19
107888423	20.8933	23.8633	17.05	25.1333	0.186306	5.74823e-06	-0.298697	1.96439e-11	0.265336	2.90112e-11
107888424	60.1833	30.7133	31.89	25.5433	-0.977789	6.60533e-167	-0.92347	2.99665e-151	-1.24236	2.14011e-243
107888425	0.596667	0.866667	0.55	0.313333	0.54956	0.00246943	-0.101902	0.260036	-0.921737	5.34359e-05
107888426	10.5567	9.24	8.50667	7.26	-0.179092	0.00284267	-0.294445	2.07982e-06	-0.54502	3.21249e-17
107888429	8.00667	7.62667	7.34333	6.44667	-0.081766	0.111429	-0.138512	0.0182632	-0.328496	3.32709e-07
107888430	9.86667	17.4233	14.6933	17.14	0.815825	2.72642e-52	0.574721	1.26488e-24	0.785195	4.43854e-48
107888431	0.07	0.203333	0.0866667	0.0333333	1.46676	0.00787385	0.178126	0.317105	-1.10367	0.0736004
107888432	100.137	66.1767	52.2367	40.6367	-0.604148	2.6918e-124	-0.946793	9.86842e-269	-1.30205	0
107888433	39.19	46.7867	36.6333	31.0867	0.270785	8.03789e-09	-0.0781374	0.0621891	-0.318179	4.45682e-10
107888434	19.9067	19.4333	17.0233	15.78	-0.0347659	0.239788	-0.224094	2.08076e-05	-0.333657	3.99483e-10
107888435	3.04	2.73	1.89333	1.77667	-0.157041	0.164754	-0.684628	4.67316e-05	-0.773438	3.82775e-06
107888437	21.6233	23.5367	20.6933	16.6633	0.133879	0.0104655	-0.0491277	0.175012	-0.365127	4.10547e-10
107888438	7.94667	8.54667	6.08333	6.09	0.10775	0.145713	-0.381122	0.000257251	-0.374457	0.000193931
107888440	4.57667	5.23	4.25	4.47333	0.194704	0.00766533	-0.0979724	0.108301	-0.0382308	0.188123
107888441	0.616667	0.813333	0.873333	0.586667	0.384367	0.0517315	0.486081	0.0152787	-0.0910536	0.207346
107888442	18.3367	17.36	19.99	22.4967	-0.0744061	0.128077	0.131162	0.0175048	0.299784	1.37237e-07
107888443	8.07667	15.2733	15.6533	9.17667	0.952376	1.33938e-52	0.995616	3.86587e-58	0.208343	0.00155014
107888444	2.72333	3.83667	3.80667	2.34	0.507707	1.27287e-06	0.499685	1.57788e-06	-0.205	0.0306017
107888445	0.39	0.503333	0.383333	0.32	0.366235	0.0956421	-0.0252351	0.354614	-0.2703	0.115692
107888446	19.1033	20.8267	21.5467	31.06	0.127953	6.6464e-05	0.178657	1.85281e-08	0.700451	2.87007e-130
107888447	0.0733333	0	0.18	0	-3.39663	0.0256132	1.27832	0.0434833	-3.36558	0.0146815
107888448	10.4067	10.1867	9.59	8.44333	-0.044078	0.227546	-0.137848	0.015562	-0.329986	1.15015e-07
107888449	29.7633	25.18	19.8133	14.6	-0.249819	8.98643e-19	-0.595966	2.60856e-89	-1.03545	1.3983e-228
107888450	13.2467	17.7233	16.55	12.1767	0.417656	9.93831e-23	0.318963	1.77344e-13	-0.12542	0.00313602
107888451	36.3867	53.0367	42.93	27.25	0.565246	3.25237e-27	0.268316	1.05053e-06	-0.398477	7.14059e-11
107888452	1.39667	1.97	1.96	1.19333	0.493423	0.000993343	0.486503	0.000979191	-0.232401	0.0612456
107888453	3.74333	7.04333	3.93333	2.01	0.937811	2.87231e-43	0.104379	0.0948656	-0.868625	7.92847e-21
107888454	6.44667	6.26333	5.2	5.70333	-0.0389239	0.315936	-0.305702	0.00457089	-0.178489	0.0384557
107888455	8.19667	7.16	5.98667	3.79333	-0.190996	0.0158998	-0.447711	2.47615e-07	-1.10266	5.15504e-30
107888456	0.443333	0.326667	0.116667	0.43	-0.452146	0.0794257	-1.92093	6.16607e-07	-0.0572377	0.240096
107888457	0.17	0.37	0.17	0.4	1.16491	0.00286607	0.0504236	0.35115	1.27737	0.000487317
107888458	0.766667	1.10333	0.466667	0.896667	0.538505	5.94534e-05	-0.87443	3.07722e-07	0.375917	0.0027579
107888459	0.1	0.24	0.106667	0.42	1.30265	0.0370525	-0.108962	0.346408	1.8604	0.00115821
107888460	1.15667	1.19	0.64	0.526667	0.0313619	0.338703	-0.835945	7.86454e-10	-1.16105	4.14315e-16
107888461	4.10667	4.03667	3.28333	2.28667	-0.0222151	0.338601	-0.320232	0.00019	-0.840117	7.13156e-19
107888463	3.37333	2.85667	1.94333	1.12333	-0.233242	0.051991	-0.790158	7.6007e-08	-1.57002	6.6631e-21
107888464	6.37333	8.46	6.38333	6.33333	0.395009	4.98899e-08	-0.000500353	0.370264	-0.00554002	0.264717
107888465	1.68667	2.28	1.41333	1.71667	0.402845	0.00888457	-0.279568	0.0640065	0.0182343	0.258178
107888467	0.493333	0.896667	0.903333	1.27333	0.884034	8.13687e-05	0.897186	5.13443e-05	1.37333	1.57991e-11
107888468	19.2367	14.91	13.77	17.9767	-0.357353	3.58196e-15	-0.482001	1.73369e-25	-0.0987492	0.00912243
107888469	1.24	1.06667	2.34333	3.38	-0.228119	0.152058	0.927192	9.1074e-08	1.44233	6.54271e-20
107888470	7.87333	9.22	8.64667	9.57333	0.231217	4.1657e-06	0.140537	0.00393465	0.285353	4.90208e-09
107888471	3.72	8.63333	16.4267	20.2433	1.24014	9.11801e-46	2.17128	3.1043e-189	2.46501	1.93514e-268
107888472	5.78667	6.36333	7.69	8.14333	0.125707	0.0730592	0.417757	4.96194e-08	0.490019	5.81131e-11
107888473	0.98	0.793333	0.72	0.893333	-0.297241	0.113922	-0.435382	0.038262	-0.133591	0.16941
107888474	5.96	6.64333	7.65667	7.59667	0.162011	0.0498699	0.367713	2.77305e-05	0.3479	4.42273e-05
107888475	7.21667	6.21333	6.69333	8.74	-0.238914	0.0058977	-0.107721	0.10822	0.337249	1.47344e-05
107888477	0.00666667	0.02	0	0.0266667	0.998437	0.263839			1.59995	0.101728
107888478	4.66667	4.08333	3.72333	5.08333	-0.193373	0.0135738	-0.327641	7.67563e-05	0.122184	0.0416395
107888480	0.876667	1.17	1.01333	0.933333	0.429969	0.000723522	0.208083	0.0635257	0.0991915	0.145972
107888481	0.17	0.166667	0.316667	0.406667	-0.0332134	0.387971	0.883891	0.0254085	1.2459	0.00105713
107888482	41.5733	37.17	28.7333	32.79	-0.16138	7.5654e-07	-0.532919	5.8276e-54	-0.341149	1.25345e-24
107888483	1.24	3.34	3.57333	2.72	1.43766	1.28291e-16	1.54056	1.38911e-19	1.13158	3.50721e-10
107888484	7.79667	6.11667	6.84333	6.08	-0.33955	0.00074988	-0.174048	0.043678	-0.351879	0.000255494
107888485	14.7933	13.2533	13.12	9.93667	-0.146715	0.00360472	-0.174571	0.000558285	-0.571733	2.79025e-25
107888486	0.06	0.0833333	0.246667	0.133333	0.440004	0.284322	2.00001	0.00245799	1.09416	0.0600305
107888487	0.996667	1.17	4.45	3.38333	0.238603	0.0960708	2.16434	2.11987e-70	1.75781	4.76999e-41
107888488	0.12	0.226667	0.226667	0.78	0.890281	0.0555137	0.901957	0.0461178	2.65983	2.22451e-12
107888489	8.76333	5.81667	4.67	4.22	-0.584119	5.29561e-10	-0.90007	8.1961e-20	-1.04718	2.93333e-25
107888490	8.07667	11.15	8.54333	10.02	0.473085	6.56104e-10	0.0918525	0.126605	0.320432	2.13986e-05
107888491	4.56333	4.69	4.49667	3.49	0.059568	0.225762	-0.0132259	0.338098	-0.350395	2.76878e-05
107888492	5.87	5.34333	5.09667	6.96667	-0.135186	0.138051	-0.201843	0.0501906	0.247442	0.0100081
107888494	23.23	19.4467	11.2833	8.49667	-0.262873	8.55077e-13	-1.04707	9.63137e-140	-1.45525	1.3072e-232
107888495	4.86	5.23667	4.43	4.60333	0.106984	0.13609	-0.132649	0.0872278	-0.0762197	0.135011
107888496	4.53	3.62667	2.53667	3.72333	-0.315389	0.00351092	-0.830199	5.62125e-12	-0.281204	0.00432109
107888497	8.90667	4.84	3.88333	3.14	-0.885669	7.33551e-19	-1.2053	2.00101e-30	-1.51244	1.3999e-42
107888498	13.11	14.83	14.24	14.7533	0.17522	0.00164011	0.11764	0.0232971	0.158432	0.00220428
107888500	1.82667	2.57333	2.32333	1.68333	0.490945	9.89217e-11	0.347931	6.26156e-06	-0.118568	0.0557319
107888504	38.2	27.6	27.3	24.1633	-0.466379	8.85034e-29	-0.482633	1.35035e-30	-0.660034	8.71585e-53
107888505	24.17	22.76	18.11	14.0733	-0.0900998	0.0303592	-0.41923	9.52442e-19	-0.780478	2.01508e-54
107888507	3.24	2.73	1.15	2.32667	-0.25638	0.0845937	-1.50147	3.76834e-12	-0.488524	0.00303007
107888509	5.62	4.08333	3.28333	3.04667	-0.451496	3.05674e-12	-0.763927	2.24482e-29	-0.877582	5.1487e-37
107888510	10.1067	8.28	8.39667	15.87	-0.277606	0.00135453	-0.24656	0.00326076	0.651692	1.40059e-18
107888511	149.35	38.5067	19.0167	15.09	-1.96823	0	-2.98719	0	-3.31352	0
107888512	12.2133	13.4633	11.47	8.54667	0.14289	0.00930111	-0.0866942	0.0755901	-0.510686	6.79949e-16
107888513	4.80667	4.34333	3.37667	2.78	-0.133964	0.0358399	-0.496333	1.83169e-11	-0.777779	6.12629e-24
107888515	5.76667	5.47667	4.75667	4.42667	-0.0754338	0.139969	-0.278541	4.32051e-05	-0.385699	2.0781e-08
107888516	2.55	2.16	2.45333	4.18667	-0.250999	0.0493552	-0.0539905	0.28309	0.713514	1.50212e-09
107888517	20.3167	23.1567	19.4267	24.35	0.193818	0.00297043	-0.0471629	0.217414	0.274166	1.45078e-05
107888518	6.68667	6.73333	3.16667	2.76667	0.00747092	0.377543	-1.07848	1.77388e-38	-1.27568	6.4297e-50
107888519	5.29667	7.7	4.61667	2.41333	0.569333	9.01929e-21	-0.162611	0.0118999	-1.10963	1.03639e-42
107888521	6.71	7.77	6.36667	3.95	0.20383	0.0336865	-0.0814529	0.202932	-0.771907	2.07782e-10
107888522	0.363333	0.153333	0.203333	0	-1.26569	0.034483	-0.865588	0.0799819	-4.95054	2.82628e-05
107888523	4.79333	4.45	4.16	3.17	-0.110028	0.090473	-0.205118	0.00585551	-0.59632	6.10255e-13
107888524	0.153333	0.0766667	0.0566667	0.08	-0.995055	0.038072	-1.38687	0.00867175	-0.929368	0.027093
107888525	0.0333333	0.206667	0.0166667	0.363333	2.62137	0.00396822	-0.98654	0.242531	3.44023	1.02383e-05
107888526	2.65667	2.45333	2.19	1.40667	-0.11017	0.150938	-0.271439	0.00646092	-0.913337	3.99441e-15
107888527	62.7033	48.16	27.07	30.9733	-0.385728	1.68982e-83	-1.21998	0	-1.0214	0
107888528	7.99333	6.86333	7.34667	7.25	-0.219705	0.00813385	-0.122232	0.0773915	-0.14256	0.0339371
107888529	8.11	8.30667	8.81	8.05	0.0497321	0.238268	0.116821	0.0568199	-0.0405374	0.176956
107888531	6.68333	8.16333	7.57333	7.31333	0.286721	0.000174273	0.181451	0.0126509	0.128649	0.0372379
107888532	17.4933	16.2267	16.73	16.1867	-0.0969478	0.0519218	-0.0648773	0.118559	-0.117179	0.0139323
107888533	5.79333	5.19667	4.87	4.23	-0.14423	0.0261694	-0.238472	0.000551635	-0.440207	9.58099e-10
107888535	17.9433	12.6267	20.4367	23.7767	-0.512228	5.51463e-16	0.184513	0.000731732	0.404702	3.28308e-14
107888536	4.45333	5.15333	4.18333	3.54	0.214285	0.000655169	-0.0857586	0.100375	-0.330263	1.10246e-06
107888537	1.43	1.48667	1.33667	0.936667	0.0560848	0.332432	-0.097001	0.259236	-0.617144	0.00170633
107888538	6.57	6.88667	6.37	7.00333	0.0662521	0.168871	-0.0448644	0.222689	0.0895048	0.0623607
107888539	0.953333	0.836667	0.43	0.66	-0.176765	0.224249	-1.14183	4.17732e-05	-0.519178	0.0155435
107888540	14.2667	15.6067	14.58	16.7633	0.144284	0.0130587	0.0501963	0.188313	0.250013	1.38843e-05
107888541	14.9267	15.64	13.2333	14.6767	0.072434	0.105684	-0.165899	0.00245337	-0.0192558	0.213403
107888542	0.623333	0.823333	0.433333	0.32	0.406522	0.0781383	-0.517055	0.0545415	-0.970517	0.00187511
107888543	8.21667	8.16	6.42667	7.47	-0.0327442	0.309719	-0.392118	1.12586e-05	-0.175937	0.0163683
107888544	6.58667	7.92333	6.50333	7.43333	0.287004	2.32215e-11	0.0025959	0.362017	0.17615	2.66111e-05
107888545	32.5967	32.43	26.6533	26.56	0.000426065	0.399176	-0.281403	1.66764e-09	-0.284994	6.15677e-10
107888546	33.68	36.3567	28.4167	32.4267	0.108758	0.000891982	-0.245083	2.93122e-12	-0.0561766	0.0359861
107888547	4.54333	4.86667	4.29333	4.68667	0.100044	0.121606	-0.0774876	0.164443	0.0480689	0.170114
107888548	0.773333	0.923333	0.606667	0.39	0.287592	0.0978494	-0.309881	0.0921885	-0.970194	8.80942e-05
107888549	0.64	0.506667	0.373333	0.38	-0.32691	0.110604	-0.76678	0.00327607	-0.740042	0.00264322
107888550	43.7067	32.0767	30.4567	26.5633	-0.446273	3.08882e-71	-0.523376	9.6717e-95	-0.704404	9.25413e-160
107888551	11.2067	10.13	8.58	6.75667	-0.140855	0.0185228	-0.378778	8.30421e-09	-0.726762	1.27535e-25
107888552	0.71	0.793333	0.476667	0.363333	0.0929721	0.291143	-0.631158	0.0038299	-0.853221	0.000147995
107888553	3.15333	4.03	4.00333	4.74	0.318535	0.00769618	0.32897	0.00512045	0.562046	1.07234e-06
107888554	6.81667	6.85667	4.65333	3.50333	0.0128759	0.349341	-0.544832	7.81129e-18	-0.957719	1.96957e-45
107888555	25.2733	20.0067	18.7767	15.8733	-0.338071	5.69789e-27	-0.429254	2.17512e-41	-0.668288	1.65532e-90
107888556	3.27333	2.83	2.09667	1.82	-0.219986	0.0177439	-0.652738	5.87195e-10	-0.855957	2.63882e-15
107888557	1.71667	1.95333	1.97	1.84333	0.189121	0.187218	0.204143	0.153999	0.105834	0.18593
107888558	20.18	15.97	17.45	19.28	-0.335794	6.27134e-10	-0.209382	6.2421e-05	-0.0644927	0.0724139
107888559	4.66667	4.77667	4.35333	3.57333	0.0301996	0.329617	-0.101855	0.148557	-0.392431	0.000106922
107888561	0.03	0.0533333	0.0433333	0.0966667	0.998437	0.168406	0.750425	0.209743	1.90395	0.0106803
107888562	28.83	27.5	24.8133	25.5767	-0.0682401	0.00910219	-0.21514	9.91213e-15	-0.174167	1.62312e-10
107888563	10.8233	7.04667	8.33667	6.64667	-0.633205	7.12693e-13	-0.393943	2.70789e-06	-0.709572	9.66099e-16
107888564	7.19	5.98667	3.71333	2.01667	-0.275139	0.000202795	-0.963136	7.46052e-31	-1.84162	1.01251e-80
107888565	53.7667	46.0667	53.8033	32.3733	-0.229392	6.08871e-16	-0.00290782	0.350677	-0.740051	2.6175e-128
107888566	1.58333	1.19667	1.53333	0.963333	-0.382653	0.0180924	-0.0213058	0.344766	-0.704623	4.69117e-05
107888567	3.59667	4.26	1.92	3.69	0.190924	0.0600175	-0.940843	1.42433e-11	-0.0725504	0.167488
107888568	0	0.0166667	0	0.0166667
107888569	24.8267	19.9233	18.1967	17.3567	-0.317969	3.93935e-16	-0.447831	1.97403e-29	-0.516236	6.81757e-38
107888571	3.02333	1.10333	2.35333	2.83667	-1.45883	9.87643e-16	-0.372179	0.0086416	-0.105488	0.145219
107888573	14.42	12.22	11.9767	12.5867	-0.236008	0.000128453	-0.264163	1.7646e-05	-0.195357	0.000653922
107888574	0.163333	0.13	0.16	0.206667	-0.329747	0.218482	-0.0669802	0.337707	0.294828	0.140486
107888576	5.04667	5.66333	6	6.56667	0.236239	0.0105907	0.268471	0.00343684	0.408707	6.02535e-06
107888579	30.0433	30.1733	28.3067	29.9433	0.00885489	0.338241	-0.081635	0.00931375	-0.007677	0.234813
107888580	24.6433	40.6067	66.5367	60.2667	0.747543	1.08333e-44	1.46321	4.93585e-214	1.31224	3.80113e-163
107888583	14.1833	14.0067	13.7767	16.57	-0.0131431	0.34561	-0.0329089	0.236875	0.228861	7.20504e-06
107888584	1.87667	4.28667	10.35	13.6133	1.18827	1.25402e-32	2.47443	3.57867e-213	2.90121	0
107888588	0.0466667	0.0266667	0.0166667	0	-0.844206	0.263839	-1.41415	0.174897
107888590	7.51	7.73	7.81667	7.67	0.0407722	0.250534	0.0570472	0.172758	0.0287596	0.195705
107888591	0.22	0.816667	0.723333	1.04333	1.88855	9.4141e-06	1.72304	6.76359e-05	2.22567	1.58512e-08
107888593	8.3	15.38	15.7267	23.7733	0.88645	7.79909e-31	0.907592	1.63433e-32	1.5239	8.80644e-110
107888594	3.44667	1.91	1.77333	0.933333	-0.817061	2.9799e-21	-0.917225	1.25163e-25	-1.85588	5.76892e-73
107888596	53.95	71.82	33.11	26.0367	0.421607	6.13181e-23	-0.694111	4.03306e-41	-1.03513	7.9972e-80
107888597	52.87	51.7267	49.7733	39.2167	-0.0235796	0.220305	-0.0772793	0.00897409	-0.418615	1.13896e-36
107888599	0.686667	0.886667	1.12333	1.91	0.352848	0.060562	0.647758	0.000975305	1.42876	2.83294e-16
107888600	0.27	0.44	0.26	0.35	0.719216	0.0135634	-0.0333389	0.353149	0.398136	0.0740417
107888601	43.1967	52.0367	53.63	43.1133	0.274592	3.47169e-08	0.320833	6.59727e-11	0.00131512	0.272831
107888602	12.8233	7.38667	5.54667	6.13333	-0.801972	1.21122e-32	-1.21453	1.52255e-63	-1.06456	9.33772e-52
107888603	1	1.01333	0.846667	0.68	0.01395	0.383331	-0.24112	0.0856006	-0.570924	0.000862966
107888604	2.80333	3.98333	2.62	2.33333	0.510094	1.72869e-17	-0.0909122	0.0881951	-0.247621	0.000136869
107888605	0	0	0.01	0.01
107888607	0.533333	0.86	0.53	0.26	0.694594	0.00454598	-0.00955463	0.367376	-0.993531	0.00136443
107888608	0.21	0.0766667	0.163333	0.116667	-1.48643	0.00930111	-0.375029	0.198001	-0.851464	0.0394707
107888609	0.0233333	0.02	0	0.0233333	-0.00156253	0.399176			0.0294831	0.273235
107888611	0	0	0	0.04
107888614	0.156667	0.486667	0.55	0.356667	1.64293	4.01145e-08	1.82832	2.26164e-10	1.18351	0.000116566
107888615	0.00666667	0.0333333	0.05	0	2.66793	0.0197628	2.87658	0.00899357
107888616	16.8067	16.5967	18.4167	21.3767	-0.00671169	0.368848	0.148188	0.000899196	0.350776	1.19433e-15
107888617	1.46667	1.69667	1.66333	1.10667	0.202465	0.0733474	0.174272	0.0934485	-0.417854	0.00173009
107888619	0.11	0.186667	0.0933333	0.04	0.742203	0.0981802	-0.250332	0.283829	-1.4567	0.0243763
107888620	0.36	0.36	0.47	0.476667	-0.00156253	0.399176	0.391971	0.101096	0.407995	0.0629959
107888621	9.61	7.9	9.85667	10.8433	-0.292078	0.000662079	0.0292516	0.291748	0.165749	0.014782
107888622	11.14	9.13667	9.34	7.74667	-0.296412	0.0013762	-0.265125	0.00311475	-0.538249	2.04571e-08
107888623	1.68333	2.63667	2.04	1.07	0.659739	7.38871e-12	0.286344	0.00356782	-0.655735	2.93876e-08
107888625	0.606667	2.59333	1.09667	1.81667	2.09124	3.33177e-22	0.857461	0.000993904	1.56976	1.78553e-11
107888626	1.98667	2.20667	2.01667	1.20667	0.148863	0.161219	0.0165651	0.349568	-0.739742	5.94279e-06
107888629	6.62	6.96667	5.23333	7.18667	0.0771366	0.199267	-0.331783	0.000495063	0.123005	0.0598329
107888630	1.34333	2.42	1.96333	0.676667	0.843754	2.28387e-08	0.537216	0.000532458	-0.998858	7.24265e-07
107888631	0.136667	0.38	0.173333	0.333333	1.45371	0.00201415	0.314924	0.248735	1.2602	0.00449947
107888632	0	0.03	0	0.0166667
107888633	0	0.0233333	0	0
107888634	12.3267	10.09	5.80667	4.70667	-0.285123	1.02925e-10	-1.07836	4.47982e-103	-1.37881	8.79167e-151
107888636	8.25	6.32	6.37	3.85	-0.382115	2.90238e-06	-0.369431	4.78034e-06	-1.08998	9.9123e-33
107888637	1.01333	0.73	1.02667	0.633333	-0.460256	0.0363586	-0.0184024	0.35624	-0.61222	0.00527542
107888638	3.62333	4.09333	5.22667	8.11333	0.187584	0.0913106	0.543232	1.00632e-05	1.16981	3.20277e-26
107888639	3.07333	3.14333	3.02667	2.69667	0.0303397	0.319944	-0.0234122	0.313822	-0.190912	0.0143173
107888641	0.113333	0.156667	0.323333	0.873333	0.47731	0.227134	1.526	0.00354311	2.9455	2.79262e-12
107888642	0.0466667	0.07	0.0466667	0.0733333	0.619024	0.242507	0.083849	0.356427	0.743179	0.132132
107888645	4.77	5.30667	6.33333	6.94667	0.153917	0.064291	0.407717	5.7106e-06	0.536897	7.10696e-10
107888646	18.34	14.6033	13.3867	12.0067	-0.332654	1.76105e-09	-0.474835	3.54203e-17	-0.638285	1.78321e-28
107888647	3.35333	3.88667	3.83333	3.23	0.209396	6.07427e-05	0.191364	0.000205015	-0.0565447	0.0998427
107888648	11.3533	9.22667	4.76	2.84	-0.309552	9.80615e-12	-1.2628	1.47344e-125	-2.00841	3.89975e-243
107888650	1.67333	0.806667	0.763333	1.03667	-1.04656	1.70765e-09	-1.15351	5.81345e-11	-0.705967	7.63262e-06
107888651	2.86333	3.59667	2.45333	3.09	0.327573	8.5509e-05	-0.222595	0.00987168	0.119919	0.0580382
107888652	0.0266667	0.0866667	0.163333	0	1.66812	0.0573246	2.60905	0.00133133
107888653	0.78	0.943333	0.383333	0.576667	0.28364	0.106145	-1.02501	0.000107347	-0.4246	0.0293225
107888654	0.376667	0.153333	0.126667	0.316667	-1.31319	0.0127199	-1.56313	0.00444941	-0.282149	0.166162
107888655	11.9867	16.84	14.9567	19.7567	0.513616	3.31788e-08	0.346497	0.000217736	0.745988	2.7051e-17
107888656	4.24	4.25	3.11667	3.19667	0.00125216	0.399176	-0.446053	0.000854905	-0.411302	0.00113738
107888657	2.19667	2.06333	2.3	2.80333	-0.0922305	0.214266	0.0649679	0.242531	0.354762	0.000508454
107888658	0	0.106667	1.29333	0.75			6.68786	3.41671e-13	5.87447	1.59249e-08
107888661	0.633333	0.583333	0.843333	0.6	-0.127093	0.261306	0.417182	0.0205496	-0.0960478	0.195353
107888662	4.00667	4.19333	3.91	2.99333	0.0620631	0.200688	-0.0406329	0.248104	-0.42578	5.39839e-08
107888663	1.39	1.57333	1.22333	1.29	0.179806	0.122522	-0.186458	0.114708	-0.111734	0.146591
107888664	5.50667	4.25667	2.44333	3.61	-0.375556	0.00191529	-1.17625	7.06245e-17	-0.6237	6.07587e-07
107888665	0.53	0.48	0.3	0.23	-0.146615	0.257165	-0.835514	0.00160383	-1.19736	1.92175e-05
107888666	1.11333	1.64333	1.09667	0.81	0.572993	3.11458e-06	-0.00578852	0.365481	-0.446971	0.000994964
107888668	1.06	1.32	1.25667	0.976667	0.319726	0.0568507	0.249077	0.0972026	-0.115166	0.173838
107888669	126.187	91.9333	110.467	169.79	-0.455335	2.39073e-46	-0.188214	7.30603e-10	0.431828	2.17372e-56
107888670	24.1933	17.0933	11.5833	12.1267	-0.500962	1.62413e-21	-1.06376	3.50953e-76	-0.981015	7.72568e-67
107888672	10.44	8.5	7.3	4.86667	-0.293541	7.6055e-05	-0.511964	3.05836e-11	-1.09543	3.46712e-38
107888674	0.126667	0.276667	0.13	0	1.06494	0.0169473	-0.0103156	0.370261	-4.72112	0.000108196
107888675	0	0.0233333	0.0266667	0.03
107888676	21.4433	17.4867	13.6567	14.43	-0.306478	1.13838e-05	-0.663141	3.18283e-19	-0.576693	1.57981e-15
107888678	10.6333	12.1067	12.25	14.4067	0.185316	0.00024771	0.205374	4.09397e-05	0.437916	1.07805e-19
107888679	1.46333	1.42333	1.23	1.05667	-0.0434485	0.343569	-0.250348	0.0868887	-0.474611	0.00497707
107888680	10.69	14.6367	18.05	21.1967	0.457884	8.13346e-21	0.767215	3.34859e-62	0.982605	1.13224e-108
107888685	31.6533	20.7867	25.2333	25.7667	-0.61733	2.48409e-51	-0.337701	7.12809e-18	-0.304775	3.29095e-15
107888686	0.13	0.293333	0.173333	0.07	1.16318	0.0403043	0.391673	0.246239	-0.89129	0.103609
107888687	0.69	0.88	0.843333	1.36667	0.362846	0.108253	0.307818	0.130658	0.997167	2.75205e-05
107888689	11.27	11.5767	10.2	10.8167	0.0451883	0.172405	-0.145359	0.00177039	-0.0639348	0.0615839
107888690	3.04	3.10333	2.91333	3.15	0.0487022	0.268452	-0.0307604	0.294692	0.0779624	0.120197
107888691	8.96333	2.58333	1.73667	0.973333	-1.80791	4.0628e-119	-2.38499	1.26519e-168	-3.21345	2.06176e-228
107888692	1636.08	970.583	597.743	526.86	-0.769489	0	-1.47023	0	-1.63225	0
107888693	0.266667	0.12	0.01	0.15	-1.1524	0.0127715	-4.76264	1.26291e-07	-0.846479	0.0243718
107888694	20.01	19.4833	23.18	17.15	-0.0509795	0.0911633	0.198096	7.16686e-09	-0.239943	4.92237e-11
107888695	2.18333	3.5	6.18333	5.44667	0.695008	8.32412e-05	1.51944	2.82767e-23	1.32836	2.7895e-17
107888696	6.57	5.78333	4.8	4.89667	-0.186498	0.00161472	-0.455728	3.83578e-13	-0.427833	4.34352e-12
107888699	0.933333	2.54	2.67333	5.03667	1.43079	1.55859e-20	1.52762	5.09386e-24	2.43776	3.1043e-80
107888700	9.26	10.21	8.15333	8.39	0.142816	0.0304963	-0.179707	0.0108558	-0.140274	0.022907
107888701	84.0333	82.8133	73.4967	85.6333	-0.0208162	0.205593	-0.191298	1.92921e-13	0.0291933	0.0825114
107888702	21.0133	18.07	18.0833	17.12	-0.213922	0.000119187	-0.211872	0.000114201	-0.291432	1.30926e-07
107888704	22.14	15.3933	12.9033	10.9233	-0.522765	2.01418e-14	-0.777275	7.37259e-28	-1.00919	1.20552e-42
107888705	3.38667	7.53333	5.78	12.5233	1.1556	3.97349e-38	0.781922	3.33635e-16	1.87864	7.53118e-126
107888706	4.00333	4.03	4.06	5.08667	0.0151877	0.374727	0.0275407	0.325147	0.349262	0.00164043
107888707	16.32	16.84	21.2033	23.5233	0.077652	0.0315705	0.376504	2.25275e-24	0.497887	2.25231e-43
107888708	4.68667	3.99	3.93667	2.54	-0.229242	0.00335316	-0.24728	0.00144056	-0.87814	3.76352e-23
107888709	11.7267	9.01	10.3	11.6967	-0.382206	8.81424e-13	-0.188682	0.000199504	-0.00506585	0.25919
107888711	2.9	2.84333	2.85667	3.36333	-0.0317663	0.331675	-0.0204192	0.331072	0.21628	0.0134612
107888712	10.6433	13.06	13.23	12.4267	0.295968	5.6302e-06	0.307492	1.90772e-06	0.214655	0.000516577
107888713	2.37667	2.58	1.86	1.19333	0.120941	0.196273	-0.350434	0.0132292	-0.984924	3.44201e-09
107888714	0.186667	0.373333	0.243333	2.52667	0.987269	0.0166153	0.370382	0.197966	3.72985	5.0013e-44
107888715	17.8833	20.09	19.0067	17.8733	0.175732	0.000723451	0.0885282	0.0526685	-0.00454992	0.262462
107888717	3.24333	3.45333	3.33667	2.49333	0.0881107	0.1027	0.0375675	0.242531	-0.378092	5.21532e-08
107888718	0	0.01	0.01	0
107888720	0.433333	0.283333	0.383333	0.196667	-0.63033	0.00838516	-0.182424	0.191617	-1.16281	9.22119e-06
107888721	10.0233	5.14333	7.38667	4.28333	-0.965384	1.70777e-29	-0.440749	1.77764e-08	-1.23784	1.43704e-43
107888722	2.52	3.3	6.59	5.89667	0.38637	0.00014413	1.38437	2.08309e-59	1.21747	7.58635e-44
107888723	0.0433333	0.146667	0.186667	0.166667	1.84376	0.023721	2.15424	0.00595042	1.99542	0.00748291
107888724	1.46667	1.44	1.83667	1.25	-0.032598	0.363544	0.318196	0.0488556	-0.232402	0.0866966
107888725	21.45	17.4933	17.4367	11.6333	-0.303101	1.62677e-18	-0.308594	3.55929e-19	-0.885145	9.63217e-121
107888726	4.23667	4.38	4.95333	5.12	0.0476468	0.242656	0.226568	0.000832631	0.269626	4.56621e-05
107888727	38.2767	43.9733	35.54	34.5633	0.201433	6.18674e-08	-0.102804	0.00567334	-0.141272	0.000154824
107888728	0.0466667	0.0666667	0.08	0.0366667	0.5834	0.252641	0.820815	0.167303	-0.385554	0.213372
107888729	7.06333	8	6.34	5.55333	0.178101	0.000429126	-0.155686	0.00270959	-0.348128	2.33893e-10
107888730	15.6067	12.6033	10.3867	9.80667	-0.305245	6.15945e-08	-0.583369	3.16128e-23	-0.666842	2.91359e-29
107888732	5.79333	5.56333	5.58333	4.39	-0.0595173	0.268427	-0.0540069	0.257454	-0.401287	0.000201459
107888733	0.216667	0.13	0.273333	0.29	-0.746202	0.122628	0.346823	0.215178	0.436847	0.121556
107888734	43.05	36.9733	38.3533	58.4567	-0.219655	4.31955e-08	-0.1647	2.63099e-05	0.4494	4.69567e-37
107888736	11.0067	10.79	7.51667	5.46	-0.00559553	0.378329	-0.554674	3.05359e-21	-1.02411	7.44162e-59
107888738	1.28	1.23333	1.17	1.75667	-0.066518	0.340831	-0.133081	0.255305	0.4297	0.0254525
107888739	10.02	6.11667	5.75667	7.34333	-0.723221	1.49196e-11	-0.808862	8.14889e-14	-0.443383	6.68707e-06
107888740	8.48	10.0167	8.96333	7.8	0.240189	3.60966e-06	0.0820084	0.0655737	-0.121545	0.0108007
107888741	2.74667	2.57333	2.60667	2.23667	-0.0947084	0.176963	-0.0740958	0.202541	-0.30374	0.0014302
107888743	6.57667	7.51333	7.09	7.07333	0.203315	0.00500084	0.1006	0.0935559	0.115649	0.0448793
107888744	95.0467	84.9733	91.9867	70.3	-0.159079	1.27032e-13	-0.0441812	0.0213056	-0.431874	1.43847e-83
107888745	5.59	6.92	6.03667	5.34	0.308036	1.97591e-06	0.0962747	0.0787054	-0.0786424	0.0857339
[truncated: 54,244 more rows]

## Sheet: Data S3
Data S3 All up-regulated differentially expressed genes in coton leaves induced by A. lucorum for 4, 12 and 24 h
CK-VS-4H				CK-VS-12H				CK-VS-24H
Gene ID	log2(Pest_4H/CK)	ajusted p-value(CK-vs-Pest_4H)		Gene ID	log2(Pest_4H/CK)	ajusted p-value(CK-vs-Pest_4H)		Gene ID	log2(Pest_4H/CK)	ajusted p-value(CK-vs-Pest_4H)
107937630	1.00049	0.000101953		107947123	1.00075	1.24535e-05		107891309	1.00013	8.3088e-06
107952722	1.00078	8.89716e-07		107888362	1.00098	2.90117e-06		107943732	1.00016	5.6379e-26
107958287	1.00082	7.02217e-13		107894787	1.00098	2.74949e-07		107902219	1.00019	2.03187e-71
107933643	1.00098	6.57699e-05		107918659	1.00128	0.000248464		107895167	1.00057	1.52244e-86
107945267	1.0011	1.31137e-34		107945774	1.00198	3.13567e-18		107939124	1.00073	2.71909e-49
107953859	1.00114	4.63159e-06		107889012	1.00213	2.171e-22		107909565	1.00084	1.40255e-17
107934514	1.00124	1.34972e-128		107893230	1.00317	8.97981e-28		107904544	1.00093	1.74976e-27
107893556	1.00174	2.125e-30		107904441	1.00324	9.64856e-05		107932423	1.00095	2.86289e-44
107919891	1.0018	3.72899e-05		107946612	1.00408	8.61425e-25		107948709	1.00104	2.21346e-25
107902640	1.00289	8.91318e-16		107897352	1.00454	2.0274e-15		107899257	1.00127	1.97042e-246
107947106	1.00298	1.58509e-13		107950712	1.00482	2.98492e-10		107935118	1.0017	1.42727e-14
107891351	1.00319	0.000477789		107903486	1.00488	0.000699926		107960746	1.002	1.41381e-05
107937627	1.0033	2.65368e-05		107961796	1.00543	1.16523e-06		107955703	1.00211	5.72648e-80
107891385	1.00345	1.01515e-56		107955083	1.0059	3.32489e-51		107928380	1.00212	1.54488e-180
107933873	1.00349	1.41426e-05		107934274	1.00603	1.08965e-24		107951704	1.00252	1.289e-11
107946315	1.0046	2.52676e-07		107886205	1.00626	2.99272e-53		107905568	1.00252	1.71921e-07
107919755	1.00482	1.036e-37		107927608	1.00648	4.25838e-140		107919475	1.00252	4.28112e-14
107934096	1.005	7.43318e-18		107909366	1.00673	2.72721e-65		107946233	1.0027	1.72156e-09
107915789	1.0051	2.32153e-17		107956023	1.00711	0.000304094		107888384	1.00278	2.88318e-26
107902717	1.00528	1.87259e-08		107942366	1.00765	1.97814e-20		107895254	1.00278	5.07311e-35
107910600	1.00547	0		107939590	1.00768	2.9349e-24		107914274	1.00288	2.26352e-07
107946871	1.00571	7.13178e-53		107914649	1.0077	0.000239739		107931512	1.00309	8.14927e-10
107907332	1.00594	1.3066e-90		107945046	1.00774	2.4699e-14		107912918	1.00311	2.1557e-30
107943517	1.00652	1.33067e-49		107928286	1.00777	0.000423493		107922887	1.00322	1.36257e-08
107926544	1.00672	4.27548e-22		107962526	1.00805	4.43006e-17		107947294	1.00391	5.53408e-71
107913482	1.00683	5.16694e-83		107906715	1.00815	1.92545e-07		107941958	1.00421	2.54195e-10
107901702	1.00685	4.44145e-14		107936086	1.00826	8.16066e-12		107922676	1.00439	2.93735e-10
107937482	1.00744	1.03072e-30		107894021	1.00893	8.75037e-20		107926473	1.00439	5.71074e-06
107886199	1.00774	2.41492e-53		107929482	1.00901	5.18399e-12		107924965	1.00463	4.16907e-16
107913539	1.0082	1.8699e-37		107908997	1.0092	0		107887039	1.00494	1.52931e-05
107960107	1.00916	7.82212e-70		107916331	1.00933	0.000620153		107949036	1.0051	1.02408e-35
107929601	1.00949	4.33147e-11		107954455	1.00935	2.1075e-88		107935024	1.00515	0.000936095
107898515	1.00958	2.72513e-63		107948801	1.00986	7.96806e-18		107947319	1.00521	2.52867e-06
107929802	1.00962	1.22542e-09		107942701	1.00988	4.09563e-19		107912143	1.00573	1.87291e-102
107919752	1.00976	1.4085e-36		107909535	1.00998	7.13739e-05		107929466	1.00582	4.13701e-54
107910349	1.0099	3.91953e-21		107914126	1.01015	2.00339e-36		107922713	1.00621	1.65483e-19
107921389	1.01022	1.27322e-05		107925746	1.01033	9.48823e-19		107931682	1.00625	4.67608e-39
107927406	1.01058	3.49124e-16		107936593	1.01049	8.96101e-19		107926822	1.0066	3.03115e-29
107893031	1.01059	4.34013e-16		107936694	1.01067	1.35878e-262		107951906	1.00741	3.99007e-39
107948078	1.01065	0.000122728		107911758	1.01117	1.56722e-216		107894003	1.00741	3.37888e-59
107944438	1.01104	1.1907e-05		107892421	1.01126	1.77062e-31		107887285	1.00766	7.82409e-33
107900523	1.01173	6.40302e-06		107897253	1.01126	2.03342e-35		107920001	1.00786	6.89183e-57
107934650	1.01261	6.21797e-42		107913403	1.01144	0.000730149		107942936	1.00795	9.19535e-22
107928557	1.01262	3.96731e-71		107960311	1.01148	1.07349e-15		107951474	1.00796	0
107896088	1.01314	7.55246e-08		107947288	1.01178	6.33226e-18		107950952	1.00809	9.11629e-08
107949020	1.01458	3.07133e-65		107889324	1.01215	5.08074e-06		107951292	1.00809	9.11629e-08
107918466	1.01529	1.08668e-08		107902064	1.01285	1.75718e-32		107928137	1.00852	3.54282e-11
107935946	1.01562	2.56423e-31		107933297	1.01296	1.82516e-28		107891400	1.0087	1.35573e-20
107897051	1.01592	2.46742e-22		107955525	1.01325	8.59664e-60		107939029	1.00895	5.89305e-09
107908755	1.01635	1.98324e-59		107886197	1.01346	4.26419e-08		107924735	1.00923	4.27053e-11
107929607	1.01647	3.7622e-43		107893208	1.01346	3.93764e-10		107905365	1.00929	6.21208e-06
107911085	1.01667	1.69985e-16		107918216	1.01346	2.14674e-87		107891716	1.00954	1.65303e-50
107957918	1.01691	5.5462e-48		107909811	1.01366	0.000314454		107912138	1.00967	1.67865e-34
107887312	1.01709	2.91684e-10		107918445	1.01399	7.48145e-16		107904412	1.0101	2.22374e-188
107927445	1.0186	8.58313e-30		107895095	1.01416	7.953e-11		107910706	1.01037	8.19122e-07
107886531	1.01888	1.33869e-39		107944366	1.01431	5.69436e-22		107924164	1.01057	1.29029e-212
107927372	1.01896	1.21111e-25		107901624	1.01444	4.69525e-27		107931741	1.01058	5.10477e-12
107938889	1.019	1.43519e-27		107918013	1.01445	2.69212e-10		107962528	1.01058	0.000184532
107955459	1.01902	6.0478e-11		107922883	1.01452	2.91794e-13		107924523	1.0106	2.284e-22
107907430	1.0193	2.04359e-21		107958377	1.01473	2.25188e-131		107941183	1.01067	9.1629e-23
107891390	1.01938	1.98626e-19		107936208	1.01539	3.39069e-106		107958534	1.01077	1.56355e-12
107907127	1.0195	3.557e-09		107912431	1.0155	2.95694e-82		107942329	1.01082	5.52822e-09
107918216	1.01983	6.68377e-89		107954603	1.01574	4.47169e-35		107927170	1.01087	0.000135257
107908435	1.01999	4.59472e-05		107957686	1.01608	7.03318e-22		107957370	1.01134	0.000280256
107898138	1.02005	5.22277e-21		107890537	1.01627	2.35859e-234		107948991	1.01141	0.000641541
107903758	1.02025	7.15586e-05		107935476	1.01659	4.96095e-25		107913351	1.01141	2.75914e-10
107918030	1.02068	9.82243e-60		107889182	1.01683	2.57998e-07		107924070	1.01142	1.08887e-70
107925879	1.02089	9.13175e-11		107958722	1.01758	6.65212e-15		107919479	1.01152	3.21483e-197
107931630	1.02149	4.19513e-54		107891349	1.01766	4.00227e-195		107935791	1.01162	5.61119e-29
107936346	1.02221	1.31089e-06		107942363	1.01771	4.55519e-32		107913771	1.01174	0
107926897	1.02249	1.37511e-79		107942748	1.01785	5.9409e-14		107954275	1.01189	1.04468e-22
107902475	1.02261	2.34214e-15		107923178	1.01793	2.39497e-07		107895213	1.0119	2.27606e-23
107924366	1.02276	0.000944656		107962282	1.0187	8.19715e-07		107950100	1.01212	8.01718e-08
107955635	1.02301	3.70566e-15		107947319	1.01921	3.01798e-06		107886705	1.01242	2.70085e-06
107903746	1.02349	2.95719e-59		107923097	1.01948	4.70472e-09		107936285	1.01259	1.49954e-09
107955620	1.02372	1.14347e-198		107916180	1.02061	3.56108e-80		107935545	1.01267	1.19311e-55
107938803	1.0246	0.000724489		107940947	1.02154	2.65914e-11		107937964	1.01313	9.41997e-10
107926748	1.02488	1.04202e-05		107913272	1.02158	1.43224e-19		107956094	1.0139	4.40861e-25
107904615	1.02514	3.53308e-12		107922114	1.02167	2.09949e-16		107886541	1.01398	1.69455e-05
107963694	1.02527	7.83123e-16		107939773	1.02188	3.22079e-21		107963898	1.01402	3.26876e-08
107912819	1.02536	3.4362e-21		107945140	1.02202	7.68169e-21		107924906	1.01405	5.03186e-19
107931397	1.02571	3.25403e-06		107945899	1.02218	1.83231e-14		107930657	1.01416	1.05632e-08
107960551	1.02579	2.1347e-10		107935053	1.02219	7.31163e-22		107894619	1.01422	4.92308e-16
107958472	1.02587	1.57054e-238		107901264	1.02232	3.30237e-12		107912365	1.01444	3.62445e-13
107932030	1.0259	3.69234e-08		107907340	1.02283	7.94257e-05		107944370	1.01455	2.17899e-06
107956109	1.02612	0.000890932		107897229	1.02296	0.000765715		107898587	1.01476	5.5521e-46
107917197	1.02612	5.2377e-15		107900651	1.0241	1.21933e-23		107927553	1.01483	8.61768e-21
107962101	1.02649	4.28826e-39		107933572	1.02414	0		107916667	1.01485	2.3386e-52
107914401	1.02655	8.21563e-08		107934594	1.02421	0		107896027	1.01499	0.000400802
107932116	1.02675	1.10689e-14		107899253	1.02425	0.000275725		107900854	1.01505	8.10617e-36
107908987	1.02679	1.22543e-115		107893363	1.02438	5.16901e-32		107919928	1.01517	1.27702e-70
107905164	1.02704	7.19854e-57		107903356	1.02512	0		107934402	1.0153	4.09241e-113
107916331	1.02722	0.000584067		107895125	1.02538	1.32458e-08		107896876	1.0153	3.58356e-34
107889686	1.02728	3.24206e-34		107926536	1.02579	1.42212e-30		107910349	1.01556	1.1712e-21
107902219	1.02739	3.51481e-76		107940733	1.02682	9.15578e-06		107896088	1.01565	3.3059e-08
107942491	1.02752	8.08114e-05		107915570	1.0272	2.10998e-05		107940690	1.01577	1.29127e-63
107935820	1.02823	1.96333e-05		107928102	1.02727	9.18282e-07		107893764	1.01578	1.11714e-14
107903481	1.02845	1.81112e-08		107920024	1.0277	7.61769e-56		107922010	1.01583	2.14035e-177
107902376	1.02939	2.81819e-21		107933192	1.02785	6.05943e-55		107954124	1.01611	0
107904794	1.02947	7.32282e-24		107891194	1.02787	2.71316e-31		107950381	1.01648	2.11029e-177
107894229	1.02963	2.16134e-72		107937270	1.02801	0		107904947	1.01661	2.1733e-16
107886659	1.03058	4.12e-06		107893194	1.0286	2.63187e-49		107940778	1.01707	1.1025e-147
107946528	1.03227	2.59807e-12		107936858	1.02889	6.29072e-44		107929461	1.0171	1.05473e-11
107896903	1.03238	2.44111e-06		107909911	1.02905	1.71266e-58		107940222	1.01722	9.12459e-92
107913466	1.03275	1.2889e-67		107948848	1.02915	0.000390508		107935881	1.01726	1.62696e-36
107917740	1.03289	0		107923235	1.02917	4.57879e-10		107893724	1.01764	3.59913e-10
107946429	1.03316	5.50243e-75		107916342	1.02942	1.1603e-24		107962239	1.01801	3.22645e-24
107963721	1.03318	6.76505e-37		107955639	1.02944	3.04142e-47		107904030	1.01835	2.77792e-14
107917726	1.0333	6.60018e-16		107914520	1.02976	0		107933702	1.01849	3.94119e-09
107955586	1.03375	6.09076e-49		107899349	1.03005	0		107917084	1.01863	0
107951068	1.03405	3.99207e-10		107939149	1.03025	0		107911893	1.01866	2.95831e-05
107957873	1.03525	3.68502e-33		107957038	1.03053	9.47132e-05		107945284	1.01874	7.93352e-18
107929850	1.03544	1.14756e-82		107890614	1.03054	2.07956e-123		107886971	1.01888	8.74144e-09
107889645	1.03567	4.08796e-21		107931857	1.03069	1.20616e-11		107921766	1.01898	3.64021e-06
107961893	1.03589	1.04699e-16		107946033	1.03116	8.00902e-08		107922341	1.01919	8.19478e-149
107962681	1.03592	2.0354e-12		107939729	1.03184	5.19087e-12		107929010	1.0194	4.20865e-13
107890296	1.03593	1.1686e-05		107926236	1.03203	2.38931e-68		107924596	1.01981	6.0977e-35
107895265	1.03641	4.30208e-59		107926253	1.03203	2.38931e-68		107886073	1.0199	1.33659e-10
107955024	1.03675	1.19815e-05		107911594	1.03215	1.58183e-07		107920047	1.02061	1.49779e-76
107937828	1.03819	1.76475e-37		107942079	1.03215	7.51752e-17		107953955	1.02071	5.29591e-37
107943289	1.03829	1.1865e-12		107953594	1.03233	4.78194e-05		107961199	1.02089	9.41211e-18
107936783	1.03858	3.66031e-14		107942150	1.03326	2.14388e-13		107930610	1.02141	5.5219e-53
107922739	1.03877	0		107903477	1.03362	1.47068e-93		107906586	1.02186	2.61554e-64
107936191	1.0389	3.88701e-25		107909744	1.03392	0.000321166		107927729	1.02187	2.33254e-40
107959070	1.04009	3.35058e-09		107946011	1.03414	3.53796e-15		107893717	1.02195	0
107942282	1.04039	7.80626e-06		107962417	1.03452	1.72948e-63		107923839	1.02217	1.07728e-62
107962236	1.04048	4.34902e-95		107910154	1.03598	5.17667e-45		107949803	1.02232	1.82774e-09
107957721	1.04056	5.07767e-07		107931202	1.03628	4.6205e-46		107901265	1.02234	9.07409e-08
107925987	1.04067	3.69236e-05		107898513	1.03654	0.000647309		107909682	1.02258	0.000533505
107909366	1.04146	9.49025e-71		107916305	1.03687	1.61512e-15		107930611	1.02259	1.73129e-29
107893388	1.04151	0.00050167		107916667	1.03703	5.97687e-55		107957129	1.02273	0.000317868
107925994	1.04151	0.00050167		107961949	1.03703	9.14428e-53		107948848	1.02274	0.000260928
107954905	1.04198	9.19069e-29		107947990	1.03723	0.000114684		107953152	1.02277	1.57406e-26
107936718	1.04376	3.55794e-05		107929593	1.03733	6.49692e-11		107936840	1.02282	1.68949e-109
107937460	1.044	4.88267e-65		107907501	1.03821	1.53498e-05		107924652	1.02285	7.06182e-32
107903743	1.04477	2.55762e-18		107941832	1.03837	8.89047e-88		107886059	1.02297	1.64614e-07
107908836	1.04488	2.17428e-05		107936753	1.03875	0.000686164		107962101	1.02303	6.38501e-39
107934984	1.04531	3.66602e-09		107948287	1.03931	6.38404e-13		107940958	1.02337	1.04639e-06
107906263	1.04544	4.36321e-24		107911977	1.03934	3.82687e-19		107888781	1.02374	2.48288e-59
107960408	1.04557	7.15638e-43		107886704	1.03962	1.07712e-10		107952791	1.02389	2.23615e-05
107888780	1.04566	1.107e-05		107947272	1.03989	1.09038e-10		107914979	1.02411	1.89013e-22
107947990	1.04577	0.000119007		107912787	1.04047	2.15336e-107		107917829	1.0243	6.43799e-138
107913915	1.04581	1.48402e-14		107902197	1.0411	0		107923174	1.02432	0.000225463
107936893	1.04612	1.50418e-09		107916238	1.04134	2.49e-14		107938254	1.02437	3.73796e-31
107908617	1.04616	0.000798877		107916728	1.04222	8.55209e-77		107902762	1.0245	6.61309e-13
107922974	1.04637	1.03017e-51		107931450	1.0424	8.55777e-06		107923138	1.02466	7.39015e-20
107913208	1.04642	1.376e-09		107914135	1.04254	1.73957e-34		107929363	1.02481	0.00082429
107923878	1.04664	2.70382e-18		107919329	1.04373	4.29091e-08		107928756	1.02519	6.27696e-37
107940023	1.04664	2.15374e-06		107912078	1.04396	1.20326e-06		107938972	1.02541	7.44869e-22
107924735	1.04683	1.2598e-11		107905166	1.04406	6.05177e-95		107933389	1.02561	2.08023e-42
107943178	1.04762	6.93259e-95		107922140	1.04463	5.36557e-72		107891163	1.0257	6.83439e-33
107905106	1.04766	2.43764e-15		107909779	1.04491	3.97819e-14		107891657	1.02627	1.01366e-32
107905873	1.04777	7.0625e-14		107901632	1.04541	1.54478e-87		107936009	1.02627	1.01366e-32
107925319	1.04848	2.55196e-08		107912930	1.04553	5.4873e-09		107922749	1.02646	3.85455e-19
107924370	1.04888	7.53409e-21		107908545	1.04579	1.18971e-16		107963658	1.02658	2.82443e-18
107918579	1.04924	0.000627042		107948031	1.04583	8.74836e-05		107914496	1.02659	1.74913e-32
107916348	1.04958	3.86309e-255		107910031	1.04666	1.68871e-22		107951563	1.02688	1.92252e-38
107892119	1.04965	5.45717e-26		107908940	1.04696	1.48838e-79		107945064	1.02701	3.58165e-92
107906698	1.05061	1.30198e-23		107904567	1.04747	4.9656e-07		107933313	1.02726	1.33364e-24
107947163	1.05079	2.77066e-20		107949769	1.04754	1.153e-61		107940636	1.02748	2.2541e-10
107945719	1.05089	7.30284e-19		107920619	1.04764	3.94637e-15		107953228	1.02766	1.06086e-05
107912205	1.05137	6.80244e-54		107958163	1.04771	2.09874e-10		107934398	1.02791	0
107920761	1.05155	1.21341e-14		107957175	1.04805	7.27659e-204		107938658	1.02844	2.78227e-31
107945894	1.05216	2.24824e-11		107948976	1.04864	0.000335577		107904933	1.02901	3.94968e-121
107891371	1.05227	2.87234e-31		107924164	1.04978	2.53053e-233		107932702	1.02948	8.43225e-13
107948865	1.05228	0.000165761		107907175	1.04979	1.15827e-38		107944728	1.02948	4.56951e-10
107942660	1.05242	8.27651e-42		107957859	1.05061	6.71535e-11		107945482	1.02948	4.93623e-08
107920789	1.05334	7.64965e-49		107948183	1.05079	9.02136e-07		107960184	1.02948	0.000173346
107912180	1.05371	6.61891e-42		107947327	1.05218	2.88786e-33		107923915	1.02949	1.54781e-263
107948086	1.0539	1.98697e-18		107919094	1.05226	0.000171257		107932707	1.02957	1.0036e-14
107947137	1.05424	4.08791e-111		107903517	1.05293	0.000970147		107946923	1.0297	5.6171e-126
107942748	1.05451	5.7934e-15		107891014	1.05327	0.000117158		107960400	1.0297	3.5769e-12
107938249	1.05496	4.16926e-08		107940464	1.05348	1.04984e-32		107899340	1.0299	2.92306e-27
107919589	1.0554	1.13839e-23		107910293	1.05464	9.42144e-20		107890570	1.02995	5.70161e-102
107916238	1.05541	1.14173e-14		107930531	1.05493	4.35949e-31		107906047	1.03007	1.71581e-62
107900537	1.05551	4.16935e-87		107912267	1.05498	4.18044e-05		107886460	1.03012	8.83769e-09
107915412	1.05578	0		107925998	1.05596	2.87416e-07		107905917	1.03019	4.77985e-12
107891295	1.056	1.379e-47		107930561	1.05606	1.60426e-05		107935764	1.03097	1.77045e-48
107909816	1.05647	2.13715e-35		107895155	1.05627	9.45134e-06		107909384	1.03097	9.01368e-55
107897543	1.05714	1.75884e-108		107935177	1.05666	9.62823e-61		107931810	1.03099	1.72139e-26
107912300	1.05724	8.32711e-17		107922575	1.05667	1.09656e-05		107900532	1.03106	1.94112e-163
107925172	1.05751	1.35608e-19		107921731	1.05717	0.000648462		107912394	1.03131	3.85841e-18
107911984	1.05755	1.2541e-06		107896667	1.05722	2.4449e-92		107926594	1.03149	2.33763e-05
107916264	1.05823	0		107949021	1.05809	5.281e-05		107911477	1.03158	3.53544e-142
107952970	1.05832	6.15255e-06		107945563	1.05833	1.47429e-11		107907852	1.03164	6.80197e-28
107957115	1.05885	0.000930985		107920122	1.0585	1.75466e-89		107913549	1.03192	9.36184e-08
107916073	1.05912	1.86194e-33		107907111	1.05927	1.38633e-30		107892464	1.03197	0.000615262
107908981	1.05921	2.8299e-88		107918416	1.06023	6.31458e-06		107892630	1.03231	1.06087e-97
107909363	1.06002	2.4667e-57		107901185	1.06067	4.71276e-14		107941334	1.03282	1.57166e-132
107944909	1.0601	5.36023e-11		107940925	1.06097	6.37211e-12		107934060	1.03308	5.2769e-29
107907541	1.06025	2.21098e-43		107930657	1.06103	2.95614e-09		107911825	1.03322	1.89793e-09
107946305	1.06034	6.97989e-06		107936519	1.06145	1.69608e-08		107906440	1.03324	0.000627561
107931347	1.06074	5.42955e-26		107910472	1.06145	3.25155e-37		107958384	1.03343	1.17289e-50
107951357	1.06075	0.000559944		107902007	1.06152	7.38586e-11		107896522	1.03352	1.01827e-107
107930266	1.06141	6.3201e-43		107899168	1.06155	8.06952e-48		107909452	1.03406	1.00268e-32
107925279	1.06169	6.33491e-13		107927502	1.06181	1.78619e-31		107936143	1.03451	0
107963214	1.06194	3.1468e-18		107909560	1.06182	3.67809e-05		107940946	1.03483	9.01288e-08
107920491	1.06262	3.18109e-08		107905753	1.06207	3.38389e-36		107962037	1.03484	5.14845e-54
107920162	1.06273	1.05413e-23		107905406	1.06215	8.50539e-17		107940186	1.03491	1.22408e-23
107909563	1.0631	1.60995e-05		107886251	1.06227	3.50212e-34		107931166	1.03521	2.2804e-05
107939459	1.0634	9.50797e-11		107957891	1.06318	2.9466e-73		107945768	1.03526	9.76042e-28
107886647	1.06396	5.13402e-12		107935259	1.06336	2.07718e-273		107906079	1.03556	1.80682e-20
107886648	1.06407	3.63323e-42		107934060	1.06376	8.46899e-31		107916962	1.03579	5.40671e-15
107912718	1.06452	5.35819e-36		107924840	1.06416	7.08021e-51		107893125	1.03584	9.1016e-11
107952855	1.06456	3.94156e-12		107886636	1.06448	4.38906e-52		107925250	1.03605	5.32979e-07
107890943	1.06489	1.21725e-16		107917746	1.06482	2.39116e-48		107903669	1.03608	0.00035381
107911726	1.06524	6.62599e-29		107906983	1.06517	8.48909e-205		107957747	1.03612	7.13199e-10
107928503	1.06553	0.000236501		107912053	1.06539	1.90594e-83		107917951	1.03633	3.35271e-117
107919479	1.06556	1.54281e-224		107907264	1.06564	1.79464e-10		107887476	1.0367	1.16101e-13
107945336	1.06558	6.7208e-20		107894298	1.06564	1.05154e-85		107941096	1.03672	5.86021e-110
107901676	1.06584	0		107910278	1.0657	1.54772e-14		107942152	1.03702	4.71395e-21
107947181	1.06587	6.1874e-96		107912646	1.0658	4.89637e-30		107915686	1.03714	4.22545e-09
107922202	1.06592	5.10401e-08		107950261	1.06612	3.39944e-05		107922670	1.03717	1.85622e-30
107913643	1.06617	1.87217e-195		107917836	1.06681	3.61864e-63		107933180	1.0374	1.21113e-08
107901423	1.06713	7.52263e-105		107950816	1.06698	0.000482726		107924499	1.03747	1.34189e-13
107903418	1.06722	1.80641e-31		107891483	1.06712	8.47078e-13		107911975	1.03751	3.56127e-20
107925309	1.06743	1.0778e-09		107935406	1.06781	4.70803e-232		107951487	1.03766	1.03845e-08
107943755	1.06751	1.01005e-40		107895300	1.06781	3.27424e-16		107913134	1.03777	1.57743e-19
107922142	1.06883	1.22329e-23		107907062	1.06787	1.56504e-15		107909043	1.03783	9.10733e-108
107919998	1.06935	1.42483e-151		107909490	1.06788	3.84175e-07		107938659	1.0379	8.26831e-05
107901624	1.06942	2.02506e-30		107908507	1.06796	1.15666e-12		107950608	1.03795	9.57159e-25
107957686	1.0695	1.84991e-24		107911528	1.06847	3.0394e-133		107912787	1.0384	1.10489e-106
107925887	1.06953	1.77412e-110		107891013	1.06859	3.55286e-27		107891995	1.03868	1.71552e-16
107937526	1.06961	2.32327e-30		107953189	1.06875	0		107935138	1.03891	2.18771e-06
107891293	1.06974	3.0727e-54		107936008	1.06877	9.36042e-11		107960402	1.03901	8.6312e-08
107917994	1.06994	1.147e-43		107899340	1.06913	1.87919e-29		107886770	1.03928	1.50271e-36
107903674	1.07037	0.000218415		107926869	1.06935	0.000449167		107942487	1.03949	1.32615e-10
107905046	1.07086	4.60634e-20		107929038	1.06943	0.000202796		107889184	1.03975	2.66892e-07
107942981	1.07109	0		107938606	1.06976	2.11161e-07		107937490	1.03982	7.80533e-21
107892240	1.0711	2.4778e-14		107888839	1.06996	7.6865e-67		107934274	1.03987	9.42464e-27
107923954	1.07129	3.0728e-38		107937828	1.0704	3.46486e-40		107958221	1.0399	3.91561e-127
107891006	1.07169	4.58655e-11		107885988	1.07053	7.16612e-10		107930677	1.04009	2.92629e-130
107891055	1.07296	1.05899e-27		107921316	1.07059	2.56329e-11		107886193	1.04015	8.24327e-172
107949690	1.0731	2.35706e-18		107958809	1.0706	4.92964e-37		107928587	1.04034	1.16423e-47
107948907	1.07382	5.97819e-13		107958991	1.0709	9.36803e-05		107962062	1.04036	2.81715e-22
107904808	1.0739	3.74733e-09		107950389	1.07121	3.25118e-28		107952029	1.04039	7.67497e-60
107938953	1.07392	8.57607e-63		107912271	1.07125	1.28861e-12		107961761	1.04145	3.53356e-18
107948982	1.07398	6.21381e-33		107891931	1.07136	4.39442e-19		107908667	1.04145	4.67306e-05
107930619	1.07412	2.68088e-51		107963768	1.0716	1.12898e-23		107917933	1.04146	1.62693e-06
107908503	1.07525	1.30662e-23		107960184	1.07235	0.000147581		107920359	1.04183	4.48754e-10
107908571	1.07568	3.09033e-21		107903473	1.07246	1.19823e-18		107886701	1.04197	1.06212e-17
107951513	1.0759	2.1256e-06		107891067	1.07247	2.0161e-12		107935731	1.04208	2.56303e-38
107927303	1.07601	9.20608e-20		107936465	1.07278	7.68808e-08		107936900	1.04213	1.34447e-37
107889446	1.07631	8.7699e-38		107953750	1.07294	4.34533e-27		107917948	1.04215	1.37504e-33
107963662	1.07666	1.93164e-08		107936346	1.07309	2.4888e-07		107947253	1.04224	7.7992e-52
107920763	1.07702	3.55638e-82		107912325	1.07313	3.55725e-08		107902475	1.04227	2.69419e-16
107948000	1.0773	9.79338e-39		107943739	1.07336	2.17149e-06		107930954	1.0425	5.98833e-27
107962525	1.07733	1.31965e-09		107933190	1.07378	2.5456e-17		107894797	1.0425	5.09253e-260
107899882	1.07741	1.22573e-09		107959011	1.07453	1.59496e-40		107899393	1.04295	6.6481e-05
107933304	1.07741	0.000688786		107910618	1.07462	2.03935e-11		107946166	1.04328	7.21019e-05
107925310	1.07743	1.5801e-21		107939372	1.07493	9.96122e-13		107912990	1.04338	4.64776e-46
107890453	1.07796	2.32204e-47		107949885	1.07569	1.79977e-08		107936893	1.0439	7.92865e-10
107886719	1.07841	2.30911e-39		107957598	1.07571	2.87281e-07		107921107	1.04395	2.0046e-06
107957820	1.07861	1.12673e-16		107944063	1.07585	4.67879e-15		107905022	1.04396	8.55126e-14
107906745	1.07866	0		107960118	1.07588	5.67901e-05		107931022	1.04411	2.9254e-242
107940733	1.07962	3.1689e-06		107893722	1.07591	1.30593e-21		107885982	1.04442	6.28105e-87
107899029	1.0798	9.19666e-24		107928797	1.076	2.53121e-08		107887504	1.04486	9.26637e-07
107894291	1.08019	1.89937e-81		107908932	1.07716	5.49952e-25		107940104	1.04505	9.74877e-11
107958069	1.08088	0.000101386		107910531	1.07721	3.88442e-184		107901655	1.04518	1.09767e-17
107927158	1.0809	1.82843e-43		107930900	1.07737	1.40634e-07		107901635	1.04518	3.85878e-12
107940546	1.08136	0		107935827	1.07745	3.62075e-07		107953798	1.04562	1.51477e-107
107924888	1.08145	6.94311e-19		107939459	1.07749	3.98069e-11		107930938	1.04566	1.73491e-12
107890832	1.08158	1.45439e-06		107898243	1.07759	0.000248625		107911594	1.04568	5.96508e-08
107957172	1.08223	7.0943e-20		107912099	1.07791	5.72249e-122		107905481	1.04589	0.000228661
107900863	1.08297	1.71683e-06		107940886	1.07818	3.38649e-39		107959366	1.04592	7.82809e-07
107910618	1.08368	1.54761e-11		107960100	1.07892	8.38031e-10		107954093	1.04599	1.21764e-61
107910469	1.08389	3.64389e-29		107923264	1.07911	3.40899e-06		107949631	1.04603	5.44243e-238
107944582	1.08626	1.25826e-23		107924559	1.07922	4.17438e-27		107908435	1.0463	1.33214e-05
107905083	1.08649	2.72065e-07		107913115	1.0793	1.25523e-05		107940765	1.04666	2.84719e-15
107946428	1.08653	4.52327e-06		107953752	1.07951	9.40074e-64		107897092	1.04682	8.32743e-118
107908829	1.08737	3.4455e-08		107952491	1.07968	1.95586e-37		107936694	1.04709	3.59743e-284
107927463	1.08737	7.55698e-24		107917394	1.07996	9.52949e-11		107897353	1.04725	1.54428e-263
107953326	1.08758	8.2149e-09		107902221	1.0801	2.09206e-25		107955136	1.04754	0
107936303	1.08793	8.18748e-30		107929542	1.08036	1.29173e-108		107922446	1.0477	3.85284e-200
107889235	1.08824	1.72177e-10		107948255	1.08046	5.79988e-286		107885931	1.04776	2.15965e-24
107907292	1.08916	1.90221e-05		107928283	1.08048	9.10175e-05		107954221	1.0478	7.60189e-12
107898665	1.08929	1.45339e-74		107892023	1.08074	4.88413e-06		107905989	1.04829	0.000432661
107935158	1.08951	9.48927e-25		107932030	1.08108	3.86648e-09		107958091	1.04851	5.77972e-06
107912160	1.08959	1.71138e-05		107930409	1.08127	8.73264e-14		107939000	1.04886	1.25835e-25
107955090	1.09048	0		107949831	1.08135	2.52054e-05		107905554	1.0489	0.000594019
107940896	1.09063	8.3175e-20		107896833	1.08138	0		107886304	1.04904	3.37657e-94
107907235	1.09105	8.87601e-70		107928373	1.08161	0.000199235		107913399	1.04996	0
107946194	1.09124	5.76441e-14		107891960	1.0822	0.000650309		107954983	1.05051	3.53971e-213
107954573	1.09137	2.83142e-28		107936291	1.0822	0.000650309		107922741	1.05055	3.22554e-17
107933508	1.09152	2.19448e-31		107903425	1.08335	0.000507154		107911406	1.05099	4.74098e-63
107886053	1.09168	6.52872e-51		107896815	1.08337	0		107936204	1.0511	8.85729e-24
107941311	1.09279	1.14043e-06		107929415	1.08437	3.75098e-10		107898954	1.05111	7.76888e-29
107891219	1.09293	0.000298655		107941613	1.08437	6.45801e-21		107894198	1.05151	1.0289e-17
107923467	1.09401	4.29534e-06		107962614	1.08462	9.69071e-07		107886251	1.05194	1.39414e-33
107937440	1.09451	3.09886e-11		107936249	1.08479	0		107896548	1.05217	0.000926872
107912374	1.09488	2.34098e-116		107956146	1.08542	3.56145e-181		107935087	1.05229	1.79089e-06
107921007	1.09494	1.24756e-06		107935989	1.08552	9.88736e-60		107912952	1.05254	9.27795e-07
107904848	1.09497	1.98856e-12		107953561	1.08561	5.80204e-161		107948081	1.05257	8.36628e-07
107958221	1.09518	1.93086e-144		107908787	1.08583	1.69942e-17		107905411	1.05272	1.3429e-83
107929203	1.0953	7.7907e-14		107925737	1.08597	1.10317e-18		107954393	1.05286	2.68856e-09
107921406	1.0953	9.50479e-08		107924386	1.08618	2.04676e-167		107888815	1.05294	1.00253e-06
107944830	1.09559	2.99662e-40		107923841	1.08635	5.40043e-127		107936858	1.05295	2.08753e-46
107917198	1.09581	4.71848e-119		107911614	1.08664	7.8856e-22		107920095	1.05313	6.48755e-105
107905060	1.09581	1.16964e-101		107905341	1.08718	1.42783e-17		107949204	1.05332	1.1669e-66
107932068	1.09588	5.03589e-10		107946274	1.08729	2.64583e-08		107955347	1.05364	4.08361e-11
107908205	1.09633	0.000128788		107903067	1.08731	1.17595e-56		107958729	1.05378	2.26402e-13
107903476	1.09649	5.54004e-27		107945966	1.08757	2.2219e-57		107924377	1.05379	4.05975e-114
107945703	1.09664	2.20336e-17		107944845	1.08759	1.613e-07		107949722	1.05416	1.81856e-09
107934480	1.09693	2.34102e-166		107946535	1.08794	0		107906906	1.05421	2.373e-158
107937152	1.09732	3.45478e-09		107946474	1.08807	9.53573e-27		107893812	1.05427	1.98113e-08
107937829	1.09797	0.000635045		107922620	1.08815	3.77147e-09		107900548	1.05429	0.000257279
107946476	1.09806	4.12371e-36		107905512	1.08819	8.1551e-88		107962338	1.05433	6.95449e-161
107958707	1.09834	8.64646e-103		107950810	1.08898	5.74907e-48		107920924	1.0544	1.22913e-115
107905512	1.09887	4.37242e-90		107927738	1.08911	4.3508e-126		107944233	1.05445	8.45882e-31
107929892	1.09947	4.04205e-11		107931166	1.08962	1.28009e-05		107886199	1.05516	2.92515e-59
107945075	1.09968	6.72705e-08		107887396	1.09072	1.49541e-07		107934396	1.05579	0
107962704	1.10006	1.53141e-05		107901898	1.09077	4.00221e-97		107953508	1.0561	6.09612e-16
107955785	1.10045	2.13008e-06		107904410	1.09137	6.5685e-07		107936554	1.05612	3.38859e-12
107916071	1.10061	2.08494e-09		107948799	1.09156	4.94673e-37		107938592	1.05657	6.89382e-81
107921292	1.10093	1.52347e-05		107886053	1.09169	7.32592e-51		107889285	1.05663	2.50453e-160
107946427	1.10103	1.81775e-92		107937517	1.09189	3.68503e-05		107929221	1.05684	1.47168e-38
107917361	1.10106	8.44144e-28		107893305	1.09208	1.14679e-55		107946553	1.05689	1.44598e-33
107946803	1.10153	1.21462e-48		107903541	1.09249	1.13434e-13		107937032	1.05689	3.63931e-34
107933572	1.10161	0		107891776	1.09316	2.31975e-38		107920504	1.05696	0.000803706
107960825	1.10161	5.47526e-15		107906402	1.09334	1.41001e-143		107906835	1.05708	4.52554e-21
107898568	1.10226	3.58189e-17		107954386	1.09336	7.59226e-28		107912502	1.05731	2.72396e-40
107961718	1.10253	1.20553e-28		107931660	1.09399	1.85424e-06		107899049	1.05761	7.72807e-23
107922658	1.1027	6.5065e-34		107954125	1.09408	2.53967e-09		107936498	1.05772	1.24245e-198
107950148	1.10411	7.7388e-18		107909014	1.09465	9.26404e-10		107959821	1.05796	4.50152e-12
107905919	1.10482	5.32004e-07		107921132	1.09574	8.11574e-05		107954573	1.05802	1.37926e-26
107937354	1.10495	2.38593e-15		107932213	1.09585	3.51464e-149		107924014	1.05946	4.89746e-13
107929403	1.10533	7.92377e-40		107954741	1.09602	0		107912986	1.05958	4.63257e-12
107905842	1.10607	4.38582e-118		107926999	1.09609	1.48239e-196		107910379	1.06067	7.00093e-32
107935041	1.10641	1.09618e-07		107950590	1.09612	1.47869e-07		107930665	1.06085	2.02155e-13
107930466	1.10659	3.77925e-70		107936221	1.09648	1.04651e-06		107927586	1.06095	1.74142e-79
107887550	1.10685	0.000257706		107891479	1.09673	4.8096e-28		107945613	1.06103	0
107899839	1.10702	4.481e-33		107919479	1.09675	2.07772e-239		107949060	1.06107	6.8393e-51
107905096	1.10717	0		107891794	1.09688	2.70612e-06		107896651	1.06118	1.74543e-105
107960222	1.10718	0.000659694		107914042	1.09698	2.34016e-60		107899492	1.06143	2.50245e-07
107902519	1.10735	1.58056e-08		107893381	1.09776	6.31793e-39		107945280	1.06195	3.23365e-103
107952036	1.1074	3.86824e-35		107924318	1.0979	2.23087e-54		107947017	1.06197	1.15529e-08
107939711	1.10745	7.71114e-08		107900624	1.098	1.01468e-32		107913958	1.06209	2.02652e-16
107917083	1.10825	1.0479e-24		107904718	1.09865	2.81656e-29		107901114	1.0625	8.4731e-11
107913626	1.10866	4.17693e-05		107960400	1.09876	1.10475e-13		107926999	1.06259	4.60491e-182
107939372	1.10883	1.6424e-13		107946635	1.09944	0.000104181		107928004	1.06264	8.24371e-30
107901002	1.10892	1.50959e-81		107945758	1.09976	2.05614e-05		107919253	1.06265	2.61749e-05
107906827	1.10939	7.36511e-11		107901653	1.10063	2.68034e-32		107886684	1.06292	4.93846e-11
107918552	1.10982	3.93106e-21		107899299	1.10078	7.9593e-07		107949952	1.06295	1.07027e-87
107958599	1.10984	8.75695e-22		107945587	1.10092	1.34629e-06		107886969	1.0632	3.4977e-14
107901275	1.11001	0.000489888		107898679	1.10095	2.13933e-09		107891646	1.06336	1.31418e-14
107929035	1.11036	8.05299e-06		107903481	1.10124	8.46007e-10		107887326	1.06345	5.86977e-05
107910245	1.11082	2.58033e-05		107955264	1.10129	5.42504e-14		107946934	1.06355	3.22201e-50
107890534	1.11125	0.000346196		107954681	1.10141	6.63883e-14		107928689	1.06382	2.38761e-18
107946847	1.11155	3.79448e-19		107929319	1.10144	1.10856e-31		107932876	1.06434	2.98254e-17
107954595	1.11178	1.81714e-83		107951886	1.10177	6.36948e-47		107920386	1.06484	1.5611e-55
107946732	1.11404	1.3869e-58		107905412	1.1019	3.8726e-07		107911861	1.06511	4.52442e-05
107946189	1.11454	4.87173e-05		107899074	1.10206	1.51751e-42		107924125	1.06515	1.11304e-74
107926492	1.1146	4.48617e-10		107955387	1.10212	1.01142e-203		107916226	1.06565	5.0124e-14
107908368	1.11468	0.000419992		107951336	1.10244	1.38884e-97		107959847	1.06624	1.43264e-16
107929236	1.11512	0.000169847		107899482	1.10248	9.48265e-45		107908811	1.06629	7.61435e-16
107890435	1.11579	5.81812e-07		107896381	1.10278	0.000236413		107903397	1.06632	2.47034e-40
107960535	1.11595	4.43614e-14		107924735	1.10356	4.48211e-13		107910123	1.06654	2.12503e-62
107950142	1.11599	1.89049e-75		107901912	1.10383	0.000984116		107937764	1.06657	4.90964e-21
107900520	1.11651	2.73468e-125		107894315	1.10384	5.93345e-13		107916533	1.0667	4.79046e-17
107946606	1.11661	2.99595e-09		107946935	1.10405	6.70156e-22		107929779	1.06682	3.78465e-13
107936093	1.11662	2.88386e-05		107895722	1.10453	1.54646e-05		107947361	1.06684	5.28823e-06
107900577	1.11667	2.29283e-10		107935991	1.10478	0		107939062	1.06714	5.88033e-10
107896377	1.11688	8.07397e-06		107946910	1.10502	4.73357e-09		107897781	1.06718	6.64705e-16
107906544	1.11754	6.20508e-126		107905003	1.1051	8.14923e-21		107949039	1.06723	3.94258e-67
107945454	1.11835	2.36494e-44		107935824	1.10577	1.51633e-06		107886925	1.06745	0
107934274	1.11938	2.39849e-31		107944465	1.10594	1.05462e-15		107886738	1.06756	0.000928142
107912330	1.11995	3.43585e-37		107935538	1.10628	1.39003e-88		107913602	1.06836	4.85472e-05
107959316	1.12003	1.60181e-24		107909184	1.10635	1.15811e-38		107960210	1.06848	6.23463e-08
107900446	1.12105	4.30617e-77		107954344	1.10697	2.71661e-10		107898154	1.06854	5.02839e-20
107931605	1.12166	3.0133e-62		107906904	1.10743	5.83563e-14		107945075	1.06869	8.62579e-08
107904251	1.12191	2.90329e-54		107962984	1.10749	2.77165e-05		107934732	1.06888	5.6804e-10
107954749	1.12194	2.50374e-12		107893442	1.10765	1.53432e-166		107956412	1.06905	4.5119e-06
107910400	1.12238	9.31966e-12		107940730	1.1078	5.00111e-62		107891961	1.06929	6.20772e-11
107926136	1.12243	4.01952e-05		107963794	1.10784	1.99941e-09		107959184	1.06938	9.66197e-153
107897687	1.12321	9.65475e-05		107896203	1.1081	2.6523e-06		107938251	1.07007	3.06974e-121
107943923	1.12324	1.52755e-28		107892563	1.10837	4.13214e-13		107942923	1.0701	4.29363e-21
107901357	1.12339	0.000442897		107891456	1.10885	2.71228e-74		107911717	1.0701	1.31089e-60
107895574	1.12401	0.000731384		107912389	1.10961	4.74847e-36		107888144	1.07013	0.000112711
107957688	1.12403	3.8171e-57		107938656	1.10968	1.66971e-05		107943737	1.07021	1.97349e-20
107962318	1.12423	2.5454e-105		107961088	1.11023	1.27135e-11		107892353	1.07045	7.38451e-06
107922424	1.12477	5.69973e-11		107958723	1.11095	7.29211e-116		107934166	1.07053	2.85939e-13
107948730	1.1253	6.23673e-34		107909795	1.11104	2.24092e-35		107909366	1.07087	2.8369e-75
107958898	1.12544	1.61672e-09		107930076	1.11115	0		107946694	1.07092	0.000372856
107926536	1.12569	9.36262e-38		107924212	1.11125	1.86138e-14		107907356	1.07099	3.98593e-08
107928463	1.12756	0.000666702		107959570	1.11158	5.23508e-17		107928884	1.07124	4.15607e-18
107892353	1.12793	4.2213e-06		107940681	1.11325	4.58678e-89		107939149	1.07126	0
107939393	1.12882	8.55919e-05		107937099	1.11328	1.02979e-13		107950499	1.0713	2.22295e-13
107958178	1.12883	3.135e-10		107891789	1.11336	1.87191e-06		107952051	1.0713	0.000135364
107960793	1.13067	4.24514e-16		107896932	1.11339	3.23835e-21		107897446	1.07154	1.97668e-49
107957774	1.13118	0		107935770	1.1135	1.62871e-08		107920713	1.07187	1.96579e-20
107906783	1.13127	1.06169e-13		107937902	1.11361	0.000101266		107929150	1.07189	2.63745e-15
107931844	1.13147	0		107933196	1.11433	8.1276e-12		107915140	1.07213	4.08573e-66
107936342	1.13148	0.000973004		107961321	1.11444	1.451e-08		107899392	1.0722	2.78453e-84
107942395	1.13187	5.2038e-18		107954595	1.11618	4.83184e-84		107889773	1.07269	3.1051e-35
107920799	1.13191	2.00275e-32		107885968	1.11666	1.13364e-29		107929345	1.07283	1.45392e-13
107932415	1.13248	2.32885e-23		107917035	1.11683	2.06984e-40		107942469	1.07294	1.55055e-304
107961067	1.13256	6.36579e-13		107912376	1.11694	1.61814e-34		107933374	1.07307	3.56267e-11
107943281	1.13266	6.58458e-90		107932116	1.11706	1.05957e-17		107946025	1.07337	1.73378e-21
107907542	1.13295	6.76045e-83		107916894	1.11763	7.19767e-18		107946803	1.07379	6.39003e-46
107931139	1.13359	0.000276774		107928813	1.1178	2.91425e-05		107886790	1.07397	1.48705e-27
107926379	1.13377	4.19088e-29		107958178	1.11788	4.14797e-10		107955797	1.07414	5.4018e-05
107916897	1.13389	1.74446e-06		107909676	1.11807	4.4187e-15		107932088	1.07415	6.99978e-05
107945928	1.13413	1.23001e-24		107905544	1.11813	3.66994e-17		107899713	1.07423	1.93392e-46
107920021	1.13443	2.02945e-17		107899682	1.1184	2.06824e-44		107922745	1.07426	2.15554e-24
107938777	1.13449	1.15205e-14		107941353	1.11867	1.3505e-14		107889669	1.07476	0.000692525
107914686	1.13531	4.51011e-17		107922960	1.11873	0.000291833		107903190	1.07481	0.000474494
107899074	1.13558	1.26672e-45		107913412	1.11934	2.46705e-08		107922213	1.07515	9.20824e-24
107943265	1.13568	1.02129e-12		107946450	1.11951	2.18429e-20		107891479	1.07537	5.24413e-27
107938033	1.13582	1.49903e-05		107938690	1.11987	2.37646e-155		107906595	1.0754	3.26053e-57
107897110	1.13594	2.99682e-12		107887251	1.12019	6.67041e-32		107908914	1.07586	0.00012678
107932207	1.13639	4.53603e-08		107924646	1.12037	0.000615561		107916535	1.07587	3.88137e-14
107916305	1.13688	6.83023e-19		107908973	1.1204	0		107925913	1.07622	0.000137398
107941069	1.1371	1.61988e-07		107912986	1.12061	2.63815e-13		107897723	1.07624	1.60111e-15
107962042	1.13721	8.36595e-21		107946403	1.12071	5.46453e-11		107938670	1.07655	8.59246e-29
107952735	1.13729	1.31491e-49		107947488	1.12079	3.5324e-10		107950403	1.07686	2.29705e-97
107939886	1.13799	2.13843e-09		107909547	1.12109	5.00428e-41		107945759	1.07698	9.24538e-51
107935218	1.13831	2.19148e-19		107918755	1.1211	4.63788e-15		107946053	1.07786	1.34158e-118
107951748	1.1384	3.45408e-11		107949200	1.12126	1.31905e-18		107910430	1.07824	2.43309e-09
107954386	1.13891	1.63059e-30		107928377	1.12135	1.40307e-50		107930110	1.07828	1.00844e-240
107954059	1.13893	5.22099e-17		107902458	1.1218	4.09576e-306		107926748	1.07841	1.41083e-06
107912173	1.14011	2.1772e-21		107915006	1.12235	2.57029e-05		107962023	1.07843	3.9568e-42
107933480	1.14017	1.40703e-69		107946664	1.12249	5.62149e-10		107935824	1.07848	1.75441e-06
107933813	1.14049	6.38294e-74		107925547	1.1237	7.84741e-18		107945234	1.07864	2.09036e-28
107946519	1.14103	0.000115159		107959070	1.12435	7.09503e-11		107933010	1.07865	8.60133e-26
107909338	1.1414	0.000901227		107921822	1.12449	0.000731853		107942919	1.08051	2.37117e-12
107934093	1.14182	0.000101838		107935054	1.12452	0.000161798		107933179	1.0816	2.11462e-08
107943377	1.14254	2.63933e-13		107941894	1.12491	2.58285e-82		107947807	1.08195	1.9189e-06
107919158	1.1429	2.20316e-19		107903950	1.12532	8.80356e-128		107908553	1.08199	4.28204e-136
107925140	1.14385	6.67686e-43		107963694	1.12563	1.72716e-19		107900618	1.08214	7.35829e-59
107957899	1.14445	4.74238e-14		107917085	1.12619	8.70313e-07		107932958	1.08233	1.35043e-07
107902876	1.14457	3.15923e-21		107934481	1.12629	7.95821e-55		107922154	1.08296	1.0894e-161
107955110	1.14483	1.09442e-07		107913606	1.12637	1.73941e-05		107886539	1.08375	8.8208e-102
107931048	1.14486	0.000749837		107920182	1.1266	0.0003574		107954330	1.08377	9.2407e-11
107913052	1.14489	1.12411e-12		107901315	1.12663	1.17884e-07		107893963	1.08383	1.14843e-48
107959601	1.14528	5.12137e-05		107920763	1.12736	3.00961e-91		107896994	1.0839	1.02189e-16
107942267	1.14569	6.43054e-07		107918687	1.12778	2.53831e-07		107949536	1.08421	1.34404e-171
107938128	1.14572	3.61676e-16		107929431	1.12778	0.000716542		107924962	1.08437	2.6538e-13
107912660	1.14613	9.48016e-08		107938496	1.12847	3.7663e-57		107919094	1.08438	6.12365e-05
107958234	1.1468	1.20821e-23		107945134	1.12856	5.1111e-74		107903418	1.08451	8.07402e-33
107946643	1.1472	1.77684e-54		107942037	1.12898	6.36847e-16		107917131	1.08467	1.01091e-09
107954837	1.1473	4.93937e-06		107927158	1.12955	4.29824e-48		107893948	1.08478	6.25139e-21
107954330	1.14745	9.09378e-12		107910411	1.13002	1.18339e-30		107951155	1.08482	0
107948329	1.14877	1.19487e-11		107930645	1.13035	5.15338e-57		107946715	1.08487	8.19542e-09
107905574	1.14891	8.82952e-20		107903784	1.13059	6.04205e-46		107926529	1.08529	4.51951e-06
107931500	1.15017	3.70902e-37		107948640	1.13067	4.11659e-73		107896870	1.08561	2.74569e-38
107900581	1.15021	3.83678e-94		107915140	1.13071	7.26194e-75		107886604	1.08563	1.93262e-18
107954821	1.1503	1.4947e-08		107947984	1.13087	0.000380286		107907457	1.08592	3.86783e-118
107893355	1.15056	1.70003e-07		107899137	1.13115	8.33896e-147		107935844	1.08605	4.49393e-113
107946034	1.15069	2.99066e-20		107924893	1.13136	4.18461e-09		107921822	1.08607	0.000705491
107908726	1.15093	8.49462e-22		107945454	1.13189	1.39755e-45		107917975	1.08628	0
107949387	1.15123	2.96536e-131		107895574	1.13211	0.000551535		107944069	1.08649	1.29231e-33
107913279	1.15138	2.22443e-06		107934604	1.13223	9.57551e-15		107892643	1.08666	1.14646e-05
107902221	1.15145	2.54857e-29		107932070	1.13255	0		107949690	1.08686	3.7165e-19
107887501	1.15154	1.07096e-56		107942487	1.13312	2.14118e-12		107937024	1.08693	8.31005e-33
107912811	1.15216	3.5362e-86		107903484	1.13313	1.32685e-24		107963078	1.0872	9.04514e-153
107927260	1.1522	4.0754e-07		107946524	1.13362	8.17557e-08		107892230	1.08762	6.36049e-09
107898763	1.1522	2.47151e-11		107911966	1.13375	1.27504e-28		107961430	1.08777	1.02412e-07
107941860	1.1526	1.85601e-39		107933389	1.13395	2.6599e-53		107895090	1.08783	4.98483e-35
107903738	1.15361	7.54295e-43		107955021	1.13397	0.000221534		107929475	1.08793	8.09933e-13
107937337	1.15397	0.000301832		107957123	1.13426	1.18393e-14		107939863	1.0881	6.56984e-07
107953900	1.15402	2.87573e-06		107916677	1.13481	2.29952e-73		107886754	1.08841	3.21454e-24
107949732	1.15436	2.0815e-38		107912815	1.13491	2.40674e-06		107942450	1.08848	1.04304e-32
107955685	1.15442	4.26251e-07		107920162	1.13526	1.49199e-27		107912664	1.08881	3.17974e-92
107888705	1.1556	3.97349e-38		107938062	1.13545	8.19203e-05		107913639	1.08898	3.48111e-10
107913006	1.1562	0.000134417		107923960	1.13636	2.83935e-21		107919411	1.08917	5.07283e-15
107958085	1.15681	8.11551e-08		107925469	1.13717	2.74606e-30		107922658	1.08951	3.63601e-33
107931847	1.15691	5.32083e-29		107918850	1.13734	2.85558e-11		107929382	1.08951	0
107938677	1.15973	1.65455e-07		107958101	1.13749	8.41113e-56		107940681	1.08969	1.30432e-84
107899060	1.16053	3.40825e-09		107889738	1.138	2.17663e-66		107925679	1.09042	1.04458e-133
107906453	1.1615	1.40629e-13		107927372	1.13801	5.83342e-33		107958544	1.09085	1.49061e-10
107921808	1.16194	1.35804e-06		107931530	1.13803	0.000189373		107954409	1.09089	1.68699e-06
107954422	1.16324	2.9658e-13		107910102	1.13814	3.85606e-17		107944112	1.09104	1.40931e-05
107932726	1.16338	3.15972e-15		107887550	1.13827	0.000134016		107953940	1.09127	3.491e-275
107955348	1.16385	0		107899041	1.13865	1.08546e-192		107959551	1.09146	5.8546e-08
107928454	1.16427	0		107922719	1.13868	1.10058e-15		107955586	1.09148	1.775e-55
107947645	1.16489	0.00060729		107938059	1.13899	9.72499e-05		107912881	1.09169	1.89845e-05
107951847	1.16489	2.35781e-10		107936367	1.13948	3.15234e-140		107958634	1.09186	3.39319e-27
107950654	1.16527	1.66984e-109		107936129	1.13961	1.32882e-50		107913988	1.09206	2.74173e-19
107942122	1.1655	9.61268e-06		107911573	1.13989	2.22618e-06		107894563	1.09242	9.0762e-86
107948807	1.16556	1.2409e-09		107903823	1.13998	0		107956281	1.09248	7.6392e-21
107897256	1.16577	1.34888e-40		107936677	1.14005	3.72112e-45		107949668	1.09252	1.42448e-16
107920971	1.16585	0.000742538		107924660	1.14034	5.5914e-45		107927544	1.09261	5.80225e-72
107914126	1.16601	1.07107e-50		107948815	1.1405	0.0003435		107958006	1.09264	3.05498e-98
107912399	1.16647	6.80383e-08		107932711	1.1408	1.06343e-162		107948178	1.09285	8.42939e-07
107900447	1.16666	1.09656e-135		107897843	1.141	1.8645e-15		107955629	1.09296	0
107949195	1.1679	3.36745e-21		107898922	1.14103	4.21071e-15		107947190	1.09316	2.26629e-104
107896984	1.168	2.38437e-09		107913541	1.14142	1.08798e-05		107933764	1.09326	1.11522e-09
107935538	1.16831	4.72746e-101		107942953	1.14236	1.59638e-22		107948320	1.09326	1.11522e-09
107960184	1.16836	3.49377e-05		107942224	1.14257	4.36703e-05		107920617	1.09368	6.86762e-46
107928899	1.1685	2.16708e-06		107914567	1.14263	2.75219e-15		107934848	1.09375	9.25895e-14
107927395	1.16858	2.01427e-11		107904747	1.14302	2.0894e-16		107891424	1.09411	7.93306e-09
107922140	1.16873	6.3315e-94		107898387	1.14316	1.62687e-07		107963700	1.09445	5.09796e-20
107961819	1.1702	0.000719628		107898742	1.14355	2.10837e-17		107942021	1.09445	3.80671e-06
107905395	1.17038	1.4623e-73		107894334	1.14408	2.38264e-64		107907684	1.09488	4.86301e-08
107922714	1.17071	6.73862e-13		107912327	1.14417	1.25253e-58		107958285	1.09493	4.29408e-05
107889447	1.17086	2.52303e-05		107889556	1.1442	0.000778339		107932588	1.09576	2.6465e-12
107931857	1.17099	3.46343e-15		107910386	1.14427	3.01547e-74		107961949	1.09583	5.70119e-60
107930083	1.17168	1.36063e-14		107960191	1.14436	2.50707e-96		107958244	1.09609	2.82148e-67
107927322	1.1726	5.39288e-09		107942203	1.14442	3.46427e-212		107939027	1.09628	7.4643e-16
107909547	1.17318	1.3067e-45		107905877	1.14515	6.17418e-17		107943376	1.09659	1.42832e-17
107943482	1.17332	5.8227e-07		107920195	1.14555	5.91556e-05		107893987	1.09688	1.31328e-41
107886754	1.17346	1.92232e-28		107942935	1.14555	5.91556e-05		107909806	1.09693	4.41396e-123
107940493	1.1737	3.21284e-06		107949318	1.14556	7.73389e-05		107908782	1.09701	2.79046e-151
107934688	1.17396	1.88673e-13		107926912	1.14562	2.75722e-07		107933788	1.09707	8.81386e-194
107896381	1.17451	9.54957e-05		107930527	1.14608	4.55006e-09		107941894	1.0971	1.46756e-77
107887159	1.17501	0.000149904		107886538	1.1463	2.85928e-26		107927847	1.09723	2.01471e-06
107939773	1.17526	5.44449e-29		107936048	1.14673	0.000136943		107893924	1.09756	0
107921467	1.17702	0.000117593		107909143	1.14674	7.2527e-63		107897206	1.09757	0.000124487
107909103	1.17769	1.03003e-157		107916417	1.14684	8.95615e-21		107899877	1.09813	2.01648e-23
107928587	1.17788	1.36671e-63		107887693	1.14701	1.02555e-31		107933536	1.09817	2.21005e-65
107932588	1.17792	5.35542e-14		107946606	1.14725	7.34755e-10		107945971	1.09821	2.07006e-73
107885973	1.1787	6.83861e-69		107936093	1.14776	1.29917e-05		107912291	1.09848	0.000150459
107917008	1.179	1.75884e-08		107954857	1.14811	1.83841e-43		107921032	1.09885	4.39726e-10
107920024	1.17935	3.76806e-77		107891347	1.14822	4.39811e-34		107912205	1.09885	1.17316e-59
107890830	1.17942	0.000598337		107947716	1.14859	4.80103e-141		107927506	1.09909	3.4042e-30
107907502	1.18068	5.1621e-25		107909617	1.14902	1.08759e-46		107929601	1.09987	1.38858e-13
107961088	1.18122	3.59896e-13		107898699	1.14925	2.20699e-15		107885963	1.1	1.74024e-26
107924076	1.18124	4.88772e-34		107958387	1.14939	8.20257e-07		107902836	1.1001	2.781e-25
107951018	1.18132	7.21858e-35		107892921	1.14992	2.77336e-14		107917008	1.10014	1.02773e-07
107962848	1.18188	1.20996e-32		107886202	1.15006	3.388e-31		107917785	1.10016	2.42789e-45
107942938	1.18214	1.40761e-37		107889785	1.15017	1.70072e-14		107903912	1.10051	0.000244902
107962792	1.18344	2.32881e-157		107935118	1.15026	2.39035e-19		107902850	1.10126	2.7481e-06
107910995	1.18394	9.58849e-06		107897473	1.1504	6.8435e-14		107946871	1.10156	3.54499e-65
107916690	1.18405	9.78173e-07		107892177	1.15107	1.7303e-32		107954848	1.10156	2.34562e-73
107918014	1.18586	2.33983e-20		107896548	1.15122	0.00046429		107896413	1.1018	7.57626e-17
107886059	1.18625	1.18729e-09		107947187	1.15125	7.06871e-73		107941102	1.10224	0.000245953
107946635	1.18689	2.76674e-05		107937490	1.15177	6.52967e-26		107959109	1.10224	4.99671e-07
107926606	1.18729	2.35832e-05		107920453	1.15264	2.13e-41		107915895	1.10268	2.55548e-07
107899735	1.18747	0.000402097		107931637	1.15298	7.64538e-07		107923229	1.10279	5.13283e-06
107912752	1.18752	2.11663e-10		107923963	1.15328	1.19108e-51		107925280	1.10296	8.11025e-23
107946431	1.18772	1.37499e-61		107895673	1.15363	1.18401e-06		107895127	1.10303	5.63599e-116
107888584	1.18827	1.25402e-32		107962416	1.1539	3.27584e-12		107902731	1.10333	2.89268e-17
107923879	1.18885	2.61114e-07		107911357	1.15426	0.000195481		107921257	1.10367	4.44547e-07
107894006	1.18896	1.2879e-97		107962609	1.15471	2.82976e-33		107915088	1.10377	5.41892e-30
107940829	1.18979	2.62013e-172		107923955	1.15495	6.52698e-32		107893213	1.1042	4.46427e-05
107906946	1.18989	2.3469e-207		107892577	1.1557	7.51455e-29		107962070	1.10461	1.41659e-111
107945275	1.19093	8.10683e-06		107946304	1.15591	3.39904e-27		107887362	1.105	0.000113969
107898749	1.19108	1.10727e-10		107887184	1.15604	2.13595e-11		107924068	1.10521	2.62149e-147
107912754	1.19181	4.19288e-12		107938971	1.15609	1.04426e-13		107900773	1.10535	1.46402e-10
107930068	1.19237	9.34069e-13		107902465	1.15613	1.8114e-39		107935179	1.10549	1.29832e-08
107914300	1.19284	1.00809e-55		107929228	1.15653	1.6052e-09		107923775	1.10552	1.97996e-15
107919817	1.19344	4.44289e-93		107928951	1.15698	5.68311e-34		107922114	1.10556	1.09533e-19
107955264	1.19344	1.39733e-16		107905408	1.15703	1.73928e-48		107902849	1.1058	4.08058e-24
107958826	1.19375	0		107925301	1.15709	3.54672e-15		107950668	1.10598	1.19427e-13
107940600	1.19379	1.43376e-177		107934102	1.1571	5.73749e-14		107934091	1.10604	3.70667e-55
107946851	1.19402	2.61576e-18		107894202	1.1573	5.03386e-37		107942667	1.10607	1.06693e-37
107903517	1.19423	0.000180405		107929116	1.15754	5.39786e-157		107918779	1.1062	7.09574e-13
107923962	1.19471	2.17146e-140		107922493	1.15821	3.48894e-93		107939413	1.10642	6.68202e-12
107907340	1.19473	2.9401e-06		107940264	1.15841	6.62392e-167		107901701	1.10654	0.000144866
107900461	1.19493	2.87961e-05		107901352	1.15843	5.31754e-29		107927539	1.10656	2.61243e-09
107886385	1.19534	1.57441e-29		107928745	1.15874	6.32131e-05		107933134	1.10679	1.0482e-132
107889367	1.19536	1.24527e-28		107949718	1.15916	0.000811404		107909660	1.1068	9.71111e-09
107935859	1.19575	5.31993e-05		107942855	1.16028	1.73442e-05		107930301	1.10717	4.1197e-15
107957814	1.19687	8.39092e-16		107891777	1.16045	4.02423e-14		107946541	1.10816	1.52066e-79
107905216	1.19697	1.05407e-101		107925841	1.16062	0		107894089	1.10825	1.64179e-137
107942661	1.19741	2.1864e-86		107897153	1.161	1.23925e-169		107961831	1.10839	3.88476e-05
107912918	1.19767	2.243e-45		107929882	1.16119	0.00075887		107913208	1.1087	4.10414e-11
107948773	1.19797	1.77996e-13		107922334	1.16124	0		107911726	1.10933	7.00831e-32
107951777	1.19831	3.6904e-12		107924169	1.16125	4.63037e-14		107934057	1.10935	2.60404e-19
107963640	1.19836	8.75589e-18		107910351	1.16199	8.43456e-57		107947012	1.10955	7.2721e-19
107897301	1.19864	7.67279e-48		107900796	1.16238	8.88337e-07		107949769	1.10966	1.78796e-70
107941921	1.19885	1.85542e-49		107910404	1.16285	0		107934817	1.10994	4.27251e-05
107957230	1.20174	2.0662e-36		107923671	1.16306	1.51463e-05		107943781	1.11007	1.53213e-38
107897427	1.20215	1.05095e-19		107905376	1.1637	9.41266e-06		107912195	1.11009	7.10974e-81
107906999	1.20239	2.72154e-12		107927819	1.16387	1.20294e-10		107944279	1.11025	3.38748e-08
107951300	1.20355	3.01754e-05		107946736	1.16402	1.05891e-06		107949135	1.1104	1.63257e-108
107957050	1.20398	9.03142e-133		107918954	1.1643	4.03787e-11		107933074	1.11045	0.000150001
107952996	1.20604	6.83438e-07		107889728	1.16442	1.50648e-24		107958614	1.11088	1.00828e-05
107932767	1.20617	8.9646e-79		107939362	1.16458	4.75876e-108		107890641	1.11114	1.86072e-110
107886411	1.20617	5.64608e-05		107935363	1.16468	1.81286e-11		107905599	1.11161	0
107954125	1.20655	2.55714e-11		107910731	1.16567	4.36869e-05		107960259	1.11257	1.85844e-249
107917746	1.20663	7.62623e-65		107899739	1.1657	7.01413e-11		107923882	1.11258	5.24753e-36
107929179	1.20784	6.41937e-05		107949732	1.16606	2.55847e-39		107941293	1.11262	8.65327e-13
107945845	1.20792	1.68244e-09		107954515	1.16705	4.87069e-05		107922668	1.11272	1.14847e-35
107939443	1.20807	1.88214e-25		107892037	1.16712	7.09069e-31		107958559	1.11273	2.32961e-25
107905892	1.20906	7.04694e-100		107938249	1.16717	5.01444e-10		107904632	1.11347	1.45627e-18
107924238	1.20976	1.75703e-13		107922213	1.16723	2.28484e-28		107959369	1.11364	6.55186e-55
107910278	1.21071	3.83912e-19		107903476	1.16725	3.71311e-31		107908421	1.11369	5.43328e-33
107939590	1.21129	8.16349e-37		107899242	1.16751	1.11568e-21		107888326	1.11376	5.55053e-182
107923130	1.21256	0.000288516		107887431	1.16787	7.94921e-06		107888896	1.11379	5.39773e-08
107905417	1.2128	2.2928e-90		107900997	1.16798	1.85302e-36		107928113	1.11388	1.3147e-61
107911590	1.21347	1.3795e-10		107905549	1.16844	0.000362592		107945286	1.11433	7.46536e-157
107906889	1.21351	1.38069e-13		107935353	1.16866	8.49023e-10		107926373	1.11442	5.04932e-16
107899623	1.21443	4.76123e-08		107912664	1.16875	3.63787e-109		107923029	1.11453	0
107899526	1.21457	0.000393005		107907434	1.16925	4.19388e-43		107910710	1.11466	1.16573e-07
107902569	1.21507	2.10916e-48		107905216	1.16972	5.26892e-96		107899626	1.11467	1.04675e-86
107934441	1.21583	0.000261101		107887015	1.17011	3.10636e-36		107916729	1.11469	1.66213e-29
107928951	1.21665	3.66825e-38		107945618	1.17112	5.58865e-73		107929580	1.11473	0.000788056
107940335	1.21674	0.000874302		107933072	1.1716	0.000223693		107914997	1.11487	1.99154e-05
107887073	1.21722	2.5781e-68		107958074	1.17197	6.08739e-18		107886375	1.11497	3.02614e-08
107891328	1.21735	4.50084e-215		107900440	1.17245	3.03388e-09		107946409	1.1152	2.46528e-11
107960311	1.21814	1.3633e-23		107934480	1.17361	1.30957e-194		107896826	1.1152	0
107957997	1.21826	1.86394e-62		107914562	1.17378	2.60942e-251		107905653	1.11536	5.86048e-08
107963685	1.21829	2.32175e-09		107903758	1.17397	2.428e-06		107893001	1.11536	3.65556e-10
107937243	1.2184	2.17253e-60		107908537	1.17403	2.1815e-09		107893249	1.11541	3.51964e-51
107927622	1.21846	2.68635e-08		107905022	1.17465	1.69371e-17		107954000	1.11547	8.40982e-23
107938062	1.21895	2.32824e-05		107953083	1.17473	5.77324e-20		107960118	1.1156	1.62228e-05
107911458	1.21929	1.22489e-07		107963876	1.17523	8.10712e-54		107933459	1.11565	0.000515109
107911137	1.21931	0		107962448	1.17583	1.34959e-20		107951558	1.11596	2.75867e-05
107945225	1.21968	4.38208e-16		107950144	1.17608	5.31478e-15		107934478	1.11597	2.80562e-78
107892141	1.22056	1.43371e-08		107953900	1.1761	1.40297e-06		107904203	1.1163	3.42808e-08
107949029	1.22083	2.21997e-05		107918779	1.17633	2.02934e-14		107958157	1.11695	0.000103352
107893532	1.22107	2.54797e-208		107897460	1.1768	5.55015e-122		107924279	1.11778	2.72368e-07
107896667	1.22108	2.92049e-130		107922658	1.17683	2.06379e-39		107936537	1.11785	2.31782e-284
107948767	1.22156	4.97196e-05		107932369	1.17696	1.56888e-09		107958324	1.11788	5.50809e-06
107887734	1.2216	8.62487e-27		107939500	1.17783	4.53646e-30		107959540	1.11791	8.47018e-09
107952491	1.22284	5.15978e-50		107925363	1.17789	6.96998e-12		107886079	1.11861	2.06858e-11
107916564	1.22359	1.38725e-12		107899596	1.17792	1.62728e-47		107932359	1.11883	7.52651e-06
107962982	1.22388	3.90511e-44		107957768	1.17814	5.07155e-25		107954607	1.11898	7.50284e-06
107915895	1.2242	1.31479e-08		107909417	1.17817	1.93988e-09		107889368	1.11946	6.53206e-09
107941961	1.22504	1.08781e-48		107901467	1.1783	2.06025e-05		107924286	1.1204	1.87235e-186
107893644	1.2252	7.80718e-151		107889614	1.1787	5.33454e-117		107902816	1.12063	0.000738385
107940941	1.22526	3.71926e-26		107899571	1.17908	1.56134e-05		107895300	1.12083	3.14275e-18
107902731	1.2253	1.8709e-21		107906035	1.17932	5.34313e-05		107957416	1.12088	0.000596685
107931384	1.22533	1.87626e-12		107934326	1.17938	9.37003e-38		107900494	1.12162	1.2155e-40
107948964	1.22551	6.65013e-16		107893607	1.17944	2.12806e-10		107920473	1.1218	6.47889e-102
107913063	1.22575	5.70674e-52		107896088	1.17965	9.30081e-11		107952407	1.12186	5.73316e-21
107942203	1.22575	3.28497e-251		107908791	1.1803	4.15957e-50		107960160	1.12192	1.42049e-29
107905345	1.22585	3.02155e-06		107900620	1.18049	1.01901e-36		107946337	1.12301	3.66855e-129
107947743	1.22585	4.09402e-11		107952016	1.18096	8.45618e-57		107886545	1.12321	1.25618e-44
107893363	1.22604	1.88849e-48		107944858	1.18097	1.82541e-91		107953633	1.12373	2.61643e-24
107890792	1.22624	6.83558e-06		107950203	1.18102	3.09192e-06		107900890	1.12383	1.87366e-19
107918354	1.22742	1.22745e-44		107961798	1.18111	2.28564e-31		107897051	1.12385	3.16221e-28
107963655	1.22753	0.000115267		107902519	1.18142	8.21268e-10		107941441	1.12385	1.78334e-05
107929891	1.22805	0		107906273	1.18195	1.94119e-38		107909645	1.1239	4.26996e-39
107946322	1.22929	1.63714e-52		107886385	1.18258	7.55403e-29		107932271	1.12402	1.26045e-08
107945908	1.22944	9.5552e-28		107924484	1.18261	1.3853e-52		107912327	1.12429	2.52462e-56
107907852	1.22991	1.85593e-41		107959772	1.18272	5.21406e-44		107962426	1.12435	3.08019e-09
107886301	1.23178	6.13552e-181		107945613	1.18298	0		107897578	1.12447	3.22882e-23
107906904	1.23271	1.45599e-17		107914108	1.18338	1.93552e-08		107909378	1.12464	0.000886926
107918929	1.23325	1.09499e-07		107926739	1.18354	1.65498e-13		107945266	1.12464	6.20195e-06
107921113	1.23529	9.90729e-10		107899882	1.18389	8.24996e-12		107898721	1.12482	0.000924814
107901612	1.23562	1.38069e-75		107935764	1.18395	9.35379e-67		107891385	1.12538	7.50109e-74
107952328	1.23592	3.19338e-12		107952898	1.18421	5.21677e-14		107893162	1.126	1.29955e-08
107915839	1.23616	0		107904679	1.18432	1.09023e-09		107923955	1.12609	2.7801e-30
107950499	1.2374	6.54404e-18		107957792	1.18436	2.86178e-10		107899160	1.12641	1.21154e-18
107888308	1.23776	3.06419e-14		107935765	1.18438	1.55402e-44		107955386	1.12652	3.48771e-25
107890783	1.23805	1.21988e-31		107925295	1.18458	0		107950590	1.12668	3.33169e-08
107929842	1.23967	1.11242e-42		107892240	1.18497	6.0356e-18		107904067	1.12717	9.29958e-56
107931585	1.24013	4.21125e-110		107931873	1.18533	3.17383e-73		107942125	1.12771	7.63096e-09
107888471	1.24014	9.11801e-46		107941759	1.18545	9.37446e-14		107910531	1.12782	1.5367e-204
107907415	1.24129	4.76617e-05		107933643	1.18677	9.34202e-07		107905932	1.12823	1.88373e-14
107909446	1.24133	9.68706e-07		107891912	1.18696	0		107891548	1.12846	1.86043e-16
107901304	1.24151	5.92944e-36		107911378	1.18698	9.53077e-07		107945513	1.12865	1.70766e-71
107959051	1.24163	6.99309e-16		107913185	1.1872	0.000231771		107923963	1.12889	3.16198e-49
107924559	1.24299	1.81147e-37		107898826	1.1874	0		107928827	1.129	2.71295e-06
107955054	1.24355	0.000107228		107890534	1.18744	9.37468e-05		107905164	1.12924	9.26403e-71
107885998	1.24376	1.91297e-59		107932542	1.18803	1.31867e-07		107913516	1.12967	2.48901e-19
107944845	1.24389	9.64702e-10		107937627	1.18822	2.48267e-07		107886053	1.1299	3.7987e-55
107953889	1.24478	1.50678e-40		107891443	1.18889	7.0087e-06		107922822	1.13007	2.07203e-18
107915836	1.24516	3.65383e-136		107950022	1.18915	3.10331e-132		107952308	1.13026	9.2997e-23
107957891	1.24568	7.84811e-107		107896573	1.18918	0		107943055	1.13029	2.1882e-12
107955596	1.24622	1.26373e-12		107927815	1.1901	3.00492e-11		107909964	1.13042	1.67157e-06
107925747	1.24716	3.75452e-21		107954330	1.19035	8.26299e-13		107957181	1.13091	1.74874e-152
107955573	1.24752	4.47216e-34		107958287	1.19046	7.74097e-19		107944593	1.13135	3.42956e-08
107910426	1.24772	1.21464e-37		107917049	1.19093	7.82351e-07		107888483	1.13158	3.50721e-10
107962452	1.24799	3.36774e-08		107900548	1.19198	5.23075e-05		107958599	1.13166	5.19396e-23
107941838	1.2483	0.000111936		107910027	1.19206	7.64511e-12		107905183	1.13172	7.17633e-37
107948647	1.24855	5.05586e-08		107957915	1.19289	2.89427e-08		107930605	1.13184	5.29574e-39
107935108	1.24936	3.52123e-15		107886470	1.193	6.0129e-05		107946716	1.13191	8.82731e-10
107925261	1.24953	4.88871e-240		107937990	1.1935	8.17347e-05		107912230	1.13193	3.34045e-47
107889738	1.24959	4.66667e-83		107914365	1.19391	1.0255e-07		107924079	1.13211	3.20213e-39
107954504	1.24996	3.80236e-32		107907415	1.19403	8.46265e-05		107958071	1.13233	2.81046e-11
107941561	1.24998	0.000549164		107951300	1.19412	2.96392e-05		107935919	1.13236	5.69805e-13
107953749	1.24998	0.000549164		107923126	1.19433	1.64695e-09		107906499	1.13278	2.71797e-10
107925737	1.25027	1.38633e-25		107930215	1.19536	1.31862e-15		107910191	1.133	2.84568e-43
107896027	1.25063	1.98128e-05		107915540	1.1955	0.000111381		107900885	1.13319	4.85468e-25
107886982	1.2515	6.05713e-120		107912705	1.19668	2.05339e-08		107946451	1.13331	0
107906188	1.25212	1.437e-72		107955573	1.19675	5.7163e-31		107957527	1.13379	0.00074285
107945363	1.25229	2.13033e-10		107918955	1.19715	0.000976905		107918950	1.13401	0.000187244
107926160	1.25274	9.5131e-11		107926069	1.19737	3.6154e-35		107940811	1.13417	2.36016e-103
107932497	1.253	1.13826e-53		107886712	1.19739	2.27991e-25		107889630	1.13433	3.32054e-12
107901161	1.25518	4.40079e-24		107943055	1.19781	9.36845e-14		107936465	1.13459	5.50231e-09
107938882	1.25575	2.92702e-24		107925172	1.19795	5.54861e-26		107929445	1.13473	1.72903e-145
107954947	1.25624	7.39064e-40		107927185	1.19796	0.00052326		107959176	1.13476	2.2986e-13
107928181	1.25646	2.4308e-06		107893355	1.19944	3.14948e-08		107914237	1.13488	9.2001e-15
107908304	1.25658	8.55609e-05		107933374	1.19949	7.75609e-14		107896272	1.13495	3.0034e-24
107905031	1.25712	9.64991e-43		107926000	1.19974	0.000480867		107894364	1.13528	3.13979e-06
107902459	1.25729	0.000110652		107912180	1.20013	1.16125e-56		107909224	1.13542	4.70579e-43
107962818	1.25769	2.12841e-17		107903583	1.20056	1.21555e-07		107900723	1.13549	2.06042e-37
107908196	1.2583	1.14658e-07		107922796	1.20074	8.35244e-05		107888963	1.13581	2.2428e-11
107929952	1.25862	7.02446e-42		107924036	1.20196	0		107953149	1.1364	0.000149252
107923102	1.25889	0.000982007		107929199	1.20205	8.10422e-06		107891132	1.13695	3.20463e-09
107924946	1.25998	1.10495e-11		107921111	1.20254	1.61914e-09		107951402	1.13722	0.000100822
107908768	1.26007	4.32138e-27		107917111	1.20306	0.000444904		107886647	1.1374	3.70094e-14
107959100	1.26109	9.16012e-15		107932955	1.20398	2.53146e-05		107946431	1.13743	1.3227e-55
107944656	1.26147	5.15586e-09		107899207	1.20406	8.83353e-12		107905406	1.1376	9.90549e-20
107937990	1.26191	3.20215e-05		107907852	1.20417	1.89298e-39		107954222	1.13796	3.02148e-11
107951215	1.26199	1.37175e-07		107955124	1.20552	5.75058e-12		107901361	1.1381	3.46097e-138
107954159	1.2623	5.70674e-62		107910392	1.20556	1.20685e-136		107921064	1.13847	1.89749e-25
107956396	1.26323	0.000535894		107907104	1.2058	5.61617e-169		107902613	1.13855	2.54314e-05
107954080	1.26395	8.30349e-32		107905183	1.20667	1.27082e-42		107911332	1.13887	5.84797e-82
107914080	1.2641	2.69344e-53		107910996	1.20696	0.000183533		107926274	1.13899	0.00086909
107930900	1.26417	2.30593e-10		107961686	1.20789	1.72636e-105		107926915	1.13911	5.47646e-30
107919247	1.26426	2.16445e-16		107913465	1.20899	1.27739e-05		107936545	1.13916	2.54778e-59
107905775	1.26452	0.000425064		107905164	1.20915	3.38151e-83		107925228	1.13942	4.80665e-17
107929292	1.26478	1.66787e-17		107902892	1.20955	0.000139344		107959048	1.1399	1.77127e-203
107903412	1.26488	6.07217e-05		107925280	1.21074	6.2411e-28		107923230	1.14028	2.81213e-17
107961686	1.26498	3.14532e-118		107929928	1.2114	9.44514e-18		107945412	1.14051	0.000369382
107887016	1.26532	4.89408e-123		107905893	1.21186	8.16478e-10		107948195	1.14052	9.9538e-12
107907497	1.2655	2.18459e-70		107887186	1.21218	6.25303e-20		107894114	1.14057	4.61025e-52
107946033	1.26592	8.85936e-12		107908667	1.21281	2.54454e-06		107899567	1.14064	4.08225e-29
107953750	1.26592	1.29196e-39		107948962	1.21281	0		107905262	1.14109	4.68974e-76
107922838	1.26595	5.77835e-33		107954222	1.21293	1.34118e-12		107926366	1.1413	8.90611e-19
107942443	1.266	0.000427575		107894163	1.21301	1.06107e-15		107953761	1.14146	1.30243e-210
107918596	1.26647	4.98764e-10		107939110	1.21305	1.37808e-06		107891449	1.1416	1.22104e-37
107938421	1.26672	8.875e-68		107891421	1.21326	2.65025e-24		107943178	1.14161	1.61972e-115
107925169	1.26735	3.49521e-12		107920691	1.21346	4.26446e-13		107906715	1.14168	9.92599e-10
107962646	1.26749	8.71953e-23		107926824	1.2142	0.000265163		107953874	1.14196	3.89046e-112
107891532	1.2675	8.23614e-08		107962696	1.21483	1.16498e-70		107912690	1.14235	7.82066e-05
107904399	1.26875	3.39357e-33		107930301	1.21515	3.0095e-18		107930596	1.1425	0
107896548	1.26922	0.00011179		107896696	1.21524	8.73333e-71		107903743	1.14257	1.32339e-22
107907777	1.27026	1.99462e-09		107926897	1.21553	2.69046e-119		107940506	1.14294	4.88032e-05
107945046	1.27106	7.52254e-24		107912918	1.21561	5.89705e-47		107962447	1.14294	3.18159e-18
107942353	1.27132	4.12281e-31		107907080	1.21567	0		107932278	1.14302	7.80595e-08
107935853	1.27194	2.70078e-32		107929883	1.21607	0.000114267		107954050	1.14316	2.50298e-36
107919070	1.27264	2.70097e-05		107918060	1.21667	2.2658e-35		107927599	1.14357	2.6577e-138
107951255	1.2728	1.17618e-20		107932088	1.21704	8.79176e-06		107946529	1.14374	8.6445e-05
107943247	1.27289	4.08697e-05		107957266	1.21737	4.8452e-08		107920645	1.14379	2.14286e-36
107910293	1.27358	3.25425e-30		107906278	1.21747	9.82228e-09		107898655	1.14404	0
107901427	1.27399	2.04151e-13		107899567	1.21775	1.21618e-33		107908537	1.1445	3.73872e-09
107911809	1.27405	4.27651e-11		107929377	1.21943	6.5045e-06		107905216	1.14457	4.6576e-91
107918202	1.27407	3.14489e-20		107944459	1.21951	4.39604e-10		107963694	1.14462	1.95465e-20
107889065	1.27409	9.31613e-11		107890945	1.21959	7.40354e-18		107942953	1.14499	7.72325e-23
107890812	1.27453	6.23881e-60		107957750	1.21961	2.7372e-35		107899053	1.14503	1.94588e-54
107897843	1.27491	1.06257e-19		107912590	1.2199	2.91668e-35		107909956	1.14506	3.50111e-45
107946474	1.27506	1.63002e-38		107902134	1.22008	0.000797709		107917419	1.14506	3.50111e-45
107910351	1.27506	6.34897e-71		107949141	1.2201	1.316e-120		107952144	1.14544	2.10845e-14
107920195	1.27592	6.47494e-06		107887016	1.22012	2.28453e-112		107954025	1.14579	1.3089e-05
107942935	1.27592	6.47494e-06		107960784	1.22019	0.00012161		107922913	1.14601	2.27175e-07
107963816	1.27681	1.76136e-252		107917967	1.22027	3.36848e-18		107945543	1.14607	1.16316e-43
107932305	1.27773	1.84265e-22		107911616	1.22058	1.78525e-08		107922560	1.14612	3.11134e-78
107933297	1.27785	1.26435e-48		107911706	1.22074	2.43748e-109		107906795	1.14615	3.55168e-175
107927738	1.2779	1.90035e-185		107934409	1.2214	2.28821e-59		107887698	1.14647	0.000588607
107954448	1.27796	6.11027e-12		107925947	1.22188	2.82684e-07		107886857	1.14655	4.04322e-94
107893341	1.27829	5.31902e-07		107932189	1.22243	8.93765e-30		107957183	1.14663	0.000721211
107954095	1.27888	5.79468e-15		107899978	1.2227	1.91868e-15		107904697	1.14726	6.17698e-06
107945825	1.27994	2.09827e-48		107928474	1.22314	1.69071e-33		107925636	1.14726	0
107907352	1.28159	2.57564e-109		107917500	1.22357	1.91656e-09		107928202	1.14732	3.03989e-05
107950690	1.2824	0.000194717		107925504	1.22391	1.35246e-18		107938128	1.1474	1.62063e-16
107947193	1.28244	1.32016e-31		107918037	1.22416	1.96149e-08		107889738	1.14771	1.02956e-67
107937922	1.28287	1.47824e-09		107918579	1.2242	3.71915e-05		107899882	1.14816	2.61823e-11
107904740	1.28292	1.89668e-10		107921085	1.22427	1.78839e-47		107909003	1.14856	4.08242e-38
107942535	1.28304	5.77584e-129		107928215	1.22434	1.05915e-119		107899074	1.1488	6.27555e-47
107893615	1.28319	1.53448e-05		107904354	1.22493	5.67356e-19		107959808	1.14889	1.52505e-44
107933697	1.28384	1.25044e-05		107939623	1.22496	5.7905e-06		107930884	1.14891	4.53756e-13
107959864	1.28386	1.00074e-08		107946847	1.22582	6.34318e-24		107954978	1.14918	5.40338e-31
107898770	1.28388	3.29125e-08		107923915	1.2259	0		107914403	1.14976	7.91911e-19
107903355	1.28417	1.25116e-257		107928069	1.226	2.14016e-06		107894834	1.14981	0
107956379	1.285	0.000148175		107891642	1.22646	5.86664e-20		107942193	1.15049	9.09871e-17
107892307	1.28508	1.73959e-90		107914288	1.22748	6.97721e-68		107929134	1.1505	1.49163e-299
107891483	1.2854	3.88314e-19		107923395	1.22753	4.37699e-12		107888320	1.15076	6.57211e-05
107912365	1.28542	1.21011e-21		107957383	1.22785	2.44512e-55		107935914	1.15079	0
107937115	1.28593	1.68136e-25		107906030	1.228	4.25807e-23		107933793	1.15102	0
107934987	1.28623	3.38175e-11		107936762	1.2286	2.34333e-06		107945887	1.15122	0.000567465
107944064	1.28624	1.92015e-15		107960829	1.23001	0.000366145		107898964	1.15127	3.36712e-77
107894281	1.28649	1.88672e-71		107937128	1.23025	5.12789e-113		107939309	1.15128	1.08574e-37
107953015	1.28849	1.81007e-08		107957814	1.23035	7.15223e-17		107945994	1.15155	4.94506e-83
107959301	1.2886	2.20931e-38		107958311	1.23042	0.000477638		107901887	1.15156	4.78492e-229
107958544	1.28929	1.22312e-14		107939645	1.23042	1.02691e-47		107905899	1.15164	5.77697e-64
107936994	1.28944	1.84428e-12		107909599	1.23068	9.64542e-46		107952855	1.15185	1.16053e-14
107918485	1.29002	5.86125e-81		107952855	1.2307	1.10654e-16		107938743	1.15186	6.37325e-49
107928813	1.29122	9.12716e-07		107888341	1.23145	8.80514e-13		107909490	1.15206	1.67135e-08
107917734	1.29148	2.59127e-160		107891121	1.23146	2.78403e-52		107924415	1.15258	1.39166e-25
107935509	1.29195	7.75596e-05		107958660	1.23164	2.39953e-07		107914734	1.15273	1.77111e-05
107926367	1.29222	1.08359e-47		107935921	1.23186	5.63096e-33		107905825	1.15323	2.72638e-14
107897518	1.29231	6.22041e-38		107945954	1.23222	1.59642e-26		107888839	1.15357	1.22408e-79
107921130	1.29234	1.71844e-34		107952170	1.23313	1.09953e-12		107932238	1.15376	1.37646e-67
107929844	1.29316	5.6378e-27		107921069	1.2335	1.15061e-38		107933054	1.15381	8.0103e-07
107962526	1.29336	8.07056e-30		107910379	1.23373	5.99468e-45		107940600	1.15388	1.40197e-162
107890942	1.29348	1.17616e-36		107929258	1.23412	2.12434e-19		107902012	1.1543	1.28645e-19
107914029	1.2938	2.12104e-05		107957349	1.2344	7.70777e-85		107942317	1.15457	0.000680938
107938898	1.2945	2.91373e-06		107952935	1.23464	0.000642085		107961625	1.15466	2.0669e-27
107920001	1.29558	5.8715e-103		107941591	1.23496	9.37872e-196		107904272	1.15503	2.98914e-05
107946518	1.29653	2.7994e-25		107962033	1.235	0.000227932		107898975	1.15546	1.23115e-26
107905554	1.29692	3.3886e-05		107913815	1.23568	1.7543e-118		107959927	1.15557	1.08906e-11
107951792	1.29694	2.03869e-06		107891934	1.23585	8.12803e-10		107931847	1.15614	3.66263e-29
107944233	1.29745	1.38752e-49		107948296	1.23592	2.68768e-12		107937693	1.15633	0.000264002
107937302	1.29908	0		107930278	1.2363	3.95572e-36		107925673	1.15653	5.50976e-199
107891934	1.2993	8.07354e-11		107889648	1.23716	4.52934e-22		107962583	1.15655	5.91984e-23
107939406	1.29934	3.17516e-37		107899342	1.2372	9.75257e-16		107906164	1.15682	0.000533706
107920849	1.29961	3.28047e-05		107929607	1.23744	3.52383e-68		107887638	1.15753	6.11791e-19
107932152	1.29984	5.47696e-267		107887124	1.23751	8.81823e-15		107912523	1.1576	0.000384267
107941832	1.29991	3.29323e-150		107919439	1.23783	8.92173e-07		107886301	1.15809	5.25853e-155
107911831	1.29997	2.51413e-142		107903054	1.23795	2.23289e-13		107962664	1.15817	4.29533e-17
107928283	1.29997	1.50697e-06		107932545	1.23827	8.2346e-06		107910415	1.15825	2.36315e-56
107914365	1.30112	4.3861e-09		107940782	1.23843	0.000878373		107963781	1.1584	7.53545e-28
107937353	1.30157	3.52106e-242		107890101	1.23895	6.71416e-12		107941160	1.15853	2.65524e-07
107961961	1.30195	1.26748e-29		107910238	1.23948	9.23479e-91		107941753	1.15877	1.20619e-11
107886478	1.30273	5.22192e-15		107894189	1.24	5.79026e-11		107906587	1.15885	5.46906e-14
107929228	1.30376	3.69151e-12		107925238	1.24041	1.19924e-05		107920511	1.15974	8.4961e-09
107913988	1.30426	1.79399e-28		107946716	1.24072	1.51305e-11		107915576	1.15998	2.84566e-66
107922415	1.3046	5.7947e-05		107909864	1.24075	0.000646841		107895356	1.1603	4.66377e-14
107940304	1.3051	0.000531605		107916963	1.24137	2.54006e-66		107896426	1.16035	9.25739e-12
107887396	1.30511	9.05717e-11		107949129	1.2414	7.34999e-17		107946519	1.16072	4.17076e-05
107963686	1.30532	4.52147e-06		107891206	1.24256	1.26631e-09		107950249	1.16105	3.73841e-12
107922713	1.30605	8.49129e-35		107925747	1.24257	4.91021e-21		107903843	1.16112	4.51647e-43
107909397	1.3061	7.83582e-10		107958362	1.24269	2.48175e-05		107928466	1.16139	1.36807e-06
107952016	1.30776	1.51044e-72		107941172	1.24273	6.24138e-11		107936109	1.16161	0.000708873
107892194	1.30868	1.59643e-27		107961903	1.24347	1.41392e-37		107930003	1.16168	1.69631e-20
107910464	1.30878	7.36293e-05		107927260	1.24358	2.2983e-08		107959617	1.16239	1.18491e-22
107951244	1.30878	7.36293e-05		107933010	1.24378	1.82748e-35		107913578	1.16239	0.000441438
107954398	1.30914	4.1267e-09		107944387	1.24384	3.18418e-05		107906614	1.16265	8.57828e-122
107962227	1.30936	0.000239436		107899357	1.24399	3.31369e-51		107954079	1.16288	6.69066e-31
107911594	1.30962	3.95706e-12		107889184	1.24524	4.27867e-10		107938480	1.16302	9.34248e-75
107916226	1.31031	1.04719e-21		107898700	1.24647	3.53574e-44		107893442	1.16332	1.73373e-186
107936187	1.31045	2.11637e-26		107922010	1.24687	9.44609e-290		107931844	1.16357	0
107948296	1.31053	6.96092e-14		107916965	1.24716	3.80063e-29		107900368	1.16363	2.24907e-05
107900524	1.31245	1.13883e-47		107949029	1.24725	1.1251e-05		107951033	1.16377	9.17749e-71
107959419	1.31295	7.5148e-07		107890868	1.24748	1.77222e-82		107897843	1.16403	2.29852e-16
107947187	1.31363	3.68275e-100		107935840	1.2487	1.42634e-21		107925690	1.16413	5.58485e-189
107928466	1.31421	5.45546e-08		107908899	1.24909	8.83532e-11		107910861	1.16424	5.71301e-23
107959959	1.31476	3.36774e-08		107914846	1.2492	0.000924993		107895534	1.16458	9.1745e-05
107926500	1.31492	1.06799e-11		107946851	1.24938	2.4247e-20		107892756	1.16491	5.58756e-10
107887928	1.3154	7.7293e-15		107924946	1.24942	1.48302e-11		107928898	1.16491	3.95282e-18
107954826	1.31592	9.997e-37		107937887	1.25054	1.42933e-13		107923954	1.16512	1.66434e-46
107927354	1.31672	0.000162794		107939711	1.25057	4.01278e-10		107961321	1.16535	1.33056e-09
107912376	1.31759	7.70933e-51		107894873	1.25089	2.00083e-11		107935000	1.1658	2.30103e-13
107962725	1.31795	1.26799e-06		107909565	1.25096	1.45891e-28		107901632	1.16588	7.12193e-113
107887828	1.31795	1.65722e-17		107892039	1.25182	4.56495e-72		107927463	1.16605	3.74151e-28
107940925	1.31795	4.82269e-19		107925646	1.25199	7.3864e-17		107932343	1.16609	4.80251e-17
107913846	1.31819	2.47139e-55		107929134	1.25206	0		107938351	1.16623	1.41262e-12
107935779	1.3187	2.06219e-37		107940468	1.25225	0.0001395		107895281	1.16628	4.95341e-27
107906273	1.31879	8.65436e-50		107896754	1.25372	0.000916425		107893151	1.16663	0
107908621	1.31924	5.92825e-36		107954460	1.25421	1.55866e-05		107923604	1.16681	2.4362e-06
107958991	1.32029	7.6591e-07		107943854	1.25509	1.19968e-110		107897374	1.16699	0.000917515
107911861	1.32037	4.55154e-07		107946451	1.25575	0		107955891	1.16736	3.28261e-76
107924646	1.32037	4.46024e-05		107897654	1.25596	0.00045623		107923008	1.16822	5.13835e-96
107948253	1.32037	8.89275e-09		107929079	1.25648	1.26777e-05		107940941	1.16855	1.01943e-23
107933375	1.32234	1.40905e-24		107907335	1.25658	2.10956e-36		107938005	1.16855	0
107936906	1.32243	0		107912784	1.25666	2.29422e-155		107936593	1.16922	3.87072e-26
107923043	1.32261	5.43908e-08		107958234	1.257	3.22434e-29		107888638	1.16981	3.20277e-26
107932376	1.32296	1.2889e-21		107914488	1.25871	1.22871e-31		107928126	1.16984	1.18502e-171
107940442	1.32368	5.59384e-13		107889393	1.25897	0		107960273	1.17015	8.84663e-23
107929472	1.32554	2.02885e-25		107937456	1.2593	1.18967e-110		107928377	1.17022	6.30439e-56
107939375	1.32595	1.71453e-06		107949678	1.2599	4.26616e-71		107947309	1.17045	0.000308449
107941957	1.32653	9.47616e-163		107889905	1.26052	0.000650395		107951158	1.17061	2.96201e-07
107955124	1.32655	1.18909e-14		107928786	1.26053	7.41996e-48		107961067	1.17068	3.47928e-14
107909569	1.3277	0.000195689		107897051	1.26057	1.51649e-36		107955253	1.17085	7.39444e-28
107948674	1.3281	4.25964e-25		107927037	1.26137	9.96934e-08		107932550	1.17121	9.69356e-05
107957202	1.32829	3.92078e-17		107942112	1.2614	0		107904192	1.17124	1.07166e-18
107937360	1.32887	3.46099e-28		107915907	1.26176	5.25471e-10		107925662	1.1713	1.4232e-06
107922402	1.32925	2.09814e-17		107937032	1.26197	2.57089e-51		107903541	1.17138	4.13611e-16
107948911	1.32963	1.08098e-05		107920827	1.26207	3.55642e-48		107906402	1.1714	1.44241e-168
107943210	1.33117	1.39267e-52		107963163	1.2622	3.66713e-08		107893289	1.17201	3.90456e-88
107906541	1.33137	2.06941e-13		107940291	1.26291	1.3078e-09		107910154	1.17299	4.62333e-60
107898721	1.33157	0.000151376		107925937	1.26317	3.39283e-31		107940679	1.17343	8.84654e-12
107954364	1.33221	1.34586e-119		107916264	1.26324	0		107913562	1.17361	1.26896e-53
107890972	1.33237	4.98796e-08		107939413	1.26339	1.63048e-15		107928390	1.17483	9.70606e-32
107902016	1.33266	0		107927095	1.26344	1.35222e-148		107898243	1.17491	3.226e-05
107897182	1.33286	9.98262e-05		107899374	1.26366	0		107936320	1.17495	6.24092e-06
107892186	1.33295	2.74973e-39		107907892	1.264	1.36663e-12		107900452	1.17496	1.26079e-28
107929475	1.33353	1.34059e-19		107929035	1.26414	1.54682e-07		107922394	1.17533	6.66303e-74
107886589	1.33428	8.13574e-117		107897353	1.26426	0		107957873	1.17536	1.69984e-44
107893652	1.33475	1.29985e-08		107891297	1.26442	4.50757e-27		107916741	1.17563	8.25158e-06
107912267	1.33634	7.92483e-08		107930382	1.26448	1.21051e-65		107928162	1.17586	0
107942629	1.33638	1.494e-35		107931498	1.26513	1.29077e-68		107930278	1.17588	2.51799e-32
107922821	1.33695	1.35777e-07		107900824	1.2654	0.000380705		107897363	1.17594	7.25103e-79
107936049	1.33702	1.97916e-10		107934092	1.26644	0		107912236	1.17637	1.49326e-11
107949293	1.33724	0.000720744		107960404	1.26699	4.54242e-51		107935415	1.17653	7.11616e-15
107891297	1.33757	7.92472e-31		107929306	1.26755	3.14062e-12		107899890	1.17671	1.5397e-16
107904145	1.33788	1.40761e-37		107918596	1.26807	3.88023e-10		107940950	1.17714	3.50366e-12
107898679	1.33829	4.08801e-14		107909298	1.26818	1.34286e-13		107892489	1.17719	9.82773e-160
107899242	1.33839	1.27371e-29		107911878	1.26961	0		107910469	1.17738	2.03958e-35
107920905	1.33901	1.60857e-06		107955737	1.27023	3.41195e-59		107895211	1.17778	9.6999e-28
107930231	1.3392	0.000853923		107932353	1.27037	2.38236e-80		107904829	1.1781	1.03846e-73
107931807	1.33956	0		107907912	1.27038	2.38914e-186		107963868	1.17835	1.36277e-63
107930938	1.33976	5.0332e-21		107905441	1.2704	0		107927921	1.17893	3.28097e-19
107915538	1.34073	0.000875183		107953815	1.27049	3.07759e-183		107899913	1.17928	4.87061e-32
107925219	1.34162	1.78695e-99		107957527	1.27094	0.000237237		107953869	1.1794	5.05132e-118
107961891	1.34175	8.03708e-21		107890446	1.27108	1.82965e-149		107912410	1.17952	6.80527e-22
107950144	1.34197	4.52227e-20		107913368	1.27179	1.01025e-13		107921420	1.17961	1.94435e-21
107951596	1.34267	6.76674e-07		107958616	1.2719	8.83926e-09		107918097	1.1797	3.98574e-69
107939894	1.34289	1.14462e-50		107957996	1.27207	2.3575e-08		107925169	1.17979	8.86487e-11
107944512	1.34293	2.00681e-50		107901182	1.27227	1.02561e-26		107914277	1.17981	0.000854173
107891056	1.34332	1.3126e-64		107962725	1.27256	2.82037e-06		107953154	1.18009	1.09846e-29
107932807	1.34376	2.41627e-12		107950095	1.27288	4.73006e-19		107923076	1.18019	0
107951336	1.3439	1.97823e-157		107906417	1.27333	8.48971e-20		107957765	1.1805	7.75118e-21
107901059	1.34411	1.74256e-06		107913063	1.27341	7.8782e-57		107906127	1.18105	0
107905575	1.34438	1.61266e-06		107926379	1.27378	3.8167e-38		107949001	1.18107	3.24821e-08
107958350	1.34454	1.46656e-14		107912396	1.27378	3.11371e-39		107944705	1.18118	9.93561e-05
107943811	1.34492	1.09651e-109		107931072	1.27383	8.10858e-07		107957471	1.18177	8.9809e-09
107953132	1.3451	0.00094659		107934650	1.27391	1.29727e-71		107898826	1.18184	0
107925573	1.34569	1.80868e-11		107910501	1.27476	1.21728e-18		107900707	1.18185	1.03244e-09
107923195	1.34569	0.000234011		107898941	1.27548	5.79635e-17		107942491	1.18189	1.69903e-06
107890696	1.34601	1.56535e-09		107932807	1.27553	4.15788e-11		107957560	1.18191	0.00019087
107917111	1.34656	7.81004e-05		107951031	1.27555	0		107919519	1.18214	2.21296e-05
107902220	1.34688	2.28037e-26		107943247	1.27582	3.22757e-05		107932807	1.18225	1.01192e-09
107917924	1.34837	3.39243e-11		107935416	1.27626	4.15498e-50		107910142	1.18247	5.101e-54
107959132	1.34855	3.56072e-09		107929952	1.27642	2.82889e-43		107937353	1.183	8.36647e-191
107893794	1.34859	0		107909103	1.27643	9.45784e-191		107932170	1.18308	7.50351e-60
107921033	1.34973	7.43151e-10		107912138	1.27649	3.60772e-59		107953123	1.18329	2.0424e-10
107913589	1.34991	4.2623e-10		107914315	1.27649	5.6127e-10		107943517	1.18334	3.79474e-72
107960784	1.35099	1.83422e-05		107934817	1.27695	2.98618e-06		107953484	1.1835	2.18345e-52
107925301	1.3512	2.08708e-21		107921404	1.2771	4.65918e-20		107888614	1.18351	0.000116566
107914566	1.35198	3.67859e-33		107919891	1.27806	3.14476e-08		107911895	1.18368	1.52867e-18
107916318	1.35206	1.07938e-07		107962763	1.27836	2.43042e-287		107961766	1.18396	2.1869e-19
107924836	1.35207	0.000433522		107925219	1.27857	2.75858e-88		107929156	1.1846	6.93106e-22
107928616	1.35283	9.11735e-37		107948570	1.27904	0.00034952		107962848	1.18522	4.93881e-33
107934576	1.35355	1.44854e-05		107937280	1.27908	0		107922201	1.18539	3.98726e-98
107917085	1.35509	1.00718e-09		107932515	1.27919	4.79231e-08		107893019	1.18548	6.29736e-17
107923387	1.35535	6.49539e-14		107961770	1.27928	1.80927e-15		107951650	1.18585	9.45943e-49
107914504	1.35547	0.000226463		107912479	1.27961	0.000235981		107902827	1.18586	5.76823e-264
107948181	1.35555	1.49787e-12		107934848	1.27979	4.33991e-19		107912269	1.18587	0.000282479
107907387	1.35578	8.95077e-18		107957818	1.27994	1.03864e-148		107905166	1.18727	3.18908e-128
107901653	1.35604	1.10739e-52		107891983	1.28025	6.60542e-10		107891423	1.18743	1.43729e-19
107918850	1.35817	1.72209e-16		107930083	1.28047	7.68312e-18		107946347	1.18799	9.10384e-06
107948950	1.35936	3.75241e-24		107897540	1.28127	9.01477e-10		107903823	1.1881	0
107939000	1.36023	1.92817e-46		107904450	1.28167	1.07685e-70		107953898	1.18814	0.000735914
107945674	1.36077	1.45524e-171		107923026	1.2819	1.14689e-07		107910748	1.18895	2.6509e-22
107931856	1.36093	2.85041e-06		107950520	1.28207	5.47362e-08		107887884	1.18914	7.05327e-07
107947288	1.36135	4.17016e-35		107912089	1.28258	5.48219e-12		107911590	1.19002	1.76853e-10
107905836	1.36188	1.883e-52		107918202	1.28259	1.33447e-20		107908787	1.19014	1.22192e-21
107905100	1.36188	1.75922e-11		107912076	1.28356	1.91165e-14		107917846	1.19036	4.54568e-65
107954942	1.36191	3.15496e-21		107890641	1.28379	2.53471e-156		107926947	1.1904	0
107954344	1.36204	5.42302e-16		107904251	1.28391	1.48738e-74		107899154	1.19069	4.41628e-228
107915825	1.36219	0.000356681		107933264	1.28425	5.15884e-07		107946997	1.19079	9.92439e-05
107933264	1.36225	8.56751e-08		107938941	1.28526	6.33542e-07		107903674	1.19103	1.42226e-05
107936176	1.36237	2.74532e-22		107937707	1.28556	4.93837e-11		107946304	1.19122	2.69506e-29
107897398	1.36242	8.95834e-13		107922583	1.28556	2.75552e-68		107892863	1.19133	9.19934e-08
107951182	1.36486	9.89799e-13		107930954	1.28589	2.26382e-43		107935220	1.19165	4.62329e-13
107908508	1.3664	4.35211e-26		107934587	1.28647	5.25351e-20		107946104	1.19167	7.1943e-10
107897609	1.3664	1.63954e-99		107916616	1.28684	3.48975e-266		107894873	1.1917	1.47795e-10
107958976	1.36736	1.68051e-05		107929292	1.28718	2.78506e-18		107907016	1.19173	1.50902e-41
107898785	1.36768	2.16965e-35		107942457	1.2873	1.21952e-44		107938727	1.19202	0.000170299
107911357	1.3677	6.9927e-06		107893289	1.28739	1.73823e-110		107958210	1.19209	9.84203e-10
107909676	1.36822	1.17391e-23		107946803	1.28793	3.03861e-70		107909795	1.19213	9.69724e-42
107904833	1.36827	5.50676e-05		107928541	1.28802	5.55863e-22		107938284	1.19253	5.17748e-23
107912227	1.3684	1.58083e-05		107909812	1.28821	6.13259e-10		107933588	1.19258	6.67012e-11
107937154	1.36855	1.28318e-09		107909159	1.28866	0.000177785		107958722	1.19267	2.73027e-21
107917059	1.36873	2.58052e-07		107940335	1.28905	0.000313313		107962216	1.19281	3.89681e-20
107890557	1.36888	1.01363e-45		107905077	1.28909	0.000530502		107914036	1.19288	2.57744e-12
107940104	1.36999	8.69178e-19		107920283	1.28926	8.51967e-57		107936598	1.19333	1.05745e-42
107941815	1.37041	1.02859e-10		107948000	1.28966	5.44866e-59		107905606	1.19337	2.6038e-19
107945872	1.37054	0.000249339		107935859	1.2899	8.13696e-06		107946361	1.1938	3.66017e-18
107937130	1.37068	1.29384e-68		107916809	1.29022	1.23516e-13		107957783	1.19418	7.43628e-36
107894282	1.3718	4.82286e-64		107913042	1.29042	0.000179689		107926754	1.19441	0
107929018	1.37225	1.70896e-12		107886478	1.29045	8.99736e-15		107918216	1.19461	2.47999e-128
107912089	1.37264	8.03956e-14		107946553	1.29081	3.57269e-53		107959717	1.19498	5.23857e-11
107900568	1.37352	0.00014046		107939894	1.2909	4.54619e-46		107914332	1.19535	6.96341e-37
107900452	1.37353	5.37556e-41		107940611	1.29092	1.90788e-09		107930195	1.19591	2.37592e-21
107899828	1.37459	1.15208e-145		107890846	1.29096	5.1749e-17		107900161	1.19602	2.59682e-07
107941529	1.37486	1.54985e-18		107960210	1.29124	2.68673e-11		107909375	1.19613	3.54613e-07
107891715	1.3755	3.11256e-05		107922838	1.29145	1.4526e-34		107912267	1.19616	1.28818e-06
107935406	1.37806	0		107918617	1.29213	2.88319e-11		107923043	1.19622	7.14764e-07
107954120	1.37847	1.5842e-24		107937794	1.29264	0.000109645		107957996	1.1966	1.22939e-07
107913048	1.37877	2.67012e-06		107928794	1.29291	9.42007e-08		107891809	1.19662	8.18779e-15
107940230	1.37981	3.08883e-22		107926915	1.29327	4.91052e-40		107957795	1.1967	1.17556e-89
107907912	1.38052	2.76828e-229		107950716	1.29348	0.000589248		107938775	1.19676	5.78809e-09
107959528	1.38052	9.58964e-11		107927844	1.29399	9.25023e-05		107948127	1.19695	1.27226e-14
107921105	1.38058	7.58349e-23		107905128	1.29458	0		107957037	1.19821	0
107946751	1.38223	3.18667e-07		107914628	1.29524	4.86042e-05		107936754	1.19831	6.93391e-28
107922814	1.38261	9.44598e-19		107950638	1.29531	0.000906675		107952170	1.19848	3.61335e-12
107946858	1.38278	1.36115e-30		107927406	1.29618	2.40038e-28		107963745	1.19905	1.75454e-28
107959758	1.38296	0.000415013		107958472	1.29646	0		107959887	1.19925	0
107925547	1.38346	1.39353e-28		107900757	1.2966	4.40198e-63		107922551	1.19941	2.81021e-10
107946455	1.38371	9.13433e-07		107954826	1.29689	1.70775e-35		107908979	1.19949	6.67414e-34
107940271	1.38407	1.00005e-05		107905379	1.29707	0.000371162		107930934	1.20059	2.00324e-12
107960404	1.38576	1.98414e-63		107928616	1.29731	2.58793e-33		107931813	1.20115	7.50763e-30
107905588	1.38581	5.31584e-06		107904631	1.29737	4.48832e-05		107930870	1.20145	1.78095e-36
107919004	1.3861	2.70254e-05		107941921	1.29739	1.3714e-59		107924484	1.20234	9.91829e-55
107914850	1.38653	8.3823e-13		107939886	1.29794	1.73379e-12		107934102	1.20249	2.08158e-15
107946833	1.38779	4.1596e-47		107912067	1.29799	5.95994e-48		107918576	1.20271	2.50567e-44
107952037	1.38779	4.1596e-47		107947291	1.29851	4.07613e-06		107942699	1.20292	3.51254e-13
107918888	1.38882	3.31967e-08		107936381	1.29872	2.09088e-06		107932414	1.20332	1.31602e-35
107954867	1.38897	2.16969e-136		107946661	1.29919	3.92497e-136		107897842	1.20333	0
107963794	1.38959	3.33433e-15		107916073	1.29939	7.34109e-54		107944429	1.20344	1.95352e-122
107943291	1.38981	0.000148577		107912356	1.29946	1.56838e-150		107920260	1.20454	2.93734e-75
107962411	1.39003	3.3257e-66		107918077	1.29997	7.07793e-106		107924543	1.20467	5.31663e-10
107942188	1.39064	1.77469e-15		107938313	1.29998	1.51984e-19		107891370	1.20511	0.000463437
107952732	1.39117	1.01402e-06		107902717	1.3005	1.39838e-14		107941957	1.2052	2.85008e-128
107894070	1.39218	2.24439e-09		107888962	1.30053	1.75043e-123		107893768	1.20542	7.95899e-17
107954767	1.39233	6.43655e-05		107889358	1.30226	2.80529e-220		107922691	1.20547	6.12007e-35
107961070	1.39272	4.65848e-07		107949526	1.30227	3.18283e-19		107904644	1.20551	1.28188e-16
107939047	1.39295	6.95331e-05		107953807	1.303	0.000876605		107917530	1.20558	6.69368e-05
107940756	1.39312	0.000126245		107886879	1.30304	1.68322e-14		107889985	1.20576	3.82237e-06
107911982	1.39325	4.34388e-62		107953297	1.30352	1.47155e-177		107913064	1.20612	6.89956e-135
107927047	1.39333	4.72101e-06		107910245	1.30367	2.92773e-07		107893931	1.20613	1.18657e-68
107949678	1.39369	5.42211e-91		107898805	1.30387	0.000608436		107937517	1.20636	2.15203e-06
107907234	1.39398	3.72677e-18		107940616	1.30407	4.36151e-09		107934187	1.2064	3.79743e-12
107942286	1.39398	3.72677e-18		107891698	1.3042	0.000363671		107922494	1.2066	8.4072e-07
107925937	1.39438	2.19268e-39		107913532	1.30432	0.000753098		107898619	1.20668	3.54906e-173
107929306	1.39443	5.30742e-15		107947181	1.30448	8.08593e-155		107946945	1.20672	1.74847e-05
107958855	1.39532	1.47246e-115		107937950	1.30492	0.000311198		107929380	1.20685	3.19572e-07
107898978	1.39635	2.01605e-36		107933882	1.30524	1.09387e-05		107911758	1.20696	0
107936609	1.39747	2.59074e-14		107930736	1.30526	1.27446e-24		107957918	1.20711	1.96272e-71
107937088	1.3988	8.68342e-07		107931315	1.30548	2.19066e-05		107958190	1.20753	8.06429e-46
107963842	1.3999	5.18549e-20		107931385	1.30599	0.000201044		107901314	1.20774	5.60536e-111
107939046	1.39992	6.11899e-05		107886604	1.30609	1.16344e-27		107894085	1.20777	0
107926764	1.40138	3.76074e-18		107900980	1.3061	3.68909e-168		107935792	1.20838	0.000840632
107938746	1.40186	3.75859e-47		107941718	1.30624	0.000316302		107896843	1.20857	8.75937e-17
107895300	1.40349	4.60658e-30		107901702	1.30641	3.53351e-25		107907044	1.20889	3.09504e-111
107958141	1.40354	2.72531e-12		107905617	1.30678	6.42794e-07		107918357	1.20915	0
107949145	1.40374	3.87059e-58		107924896	1.30692	4.31691e-29		107927819	1.20932	9.08718e-12
107902631	1.40401	1.03351e-70		107900562	1.30723	9.03461e-68		107947395	1.2095	1.37326e-26
107944264	1.40403	0.000756834		107948463	1.30734	4.21167e-14		107926190	1.20951	3.50237e-08
107945648	1.40454	4.07884e-07		107885982	1.30774	1.53247e-148		107923743	1.20964	9.61676e-05
107889403	1.40501	3.11431e-11		107927445	1.30857	2.99062e-53		107924036	1.21027	0
107936209	1.40563	0.000136347		107923091	1.3086	1.92534e-24		107905035	1.21039	1.63504e-96
107954603	1.40673	1.59667e-75		107938743	1.30996	3.22287e-66		107891454	1.21111	6.45426e-152
107920297	1.40695	3.43868e-59		107951748	1.31001	3.01162e-15		107893272	1.21128	0.00018385
107909211	1.40757	2.19838e-39		107938360	1.31114	8.17347e-05		107940866	1.21192	1.41465e-10
107921731	1.40761	2.61305e-06		107955517	1.31124	4.7478e-05		107906048	1.21226	0.000320922
107931828	1.40801	6.78924e-34		107903347	1.31178	3.07401e-05		107886704	1.2124	5.09336e-15
107908088	1.40924	4.2977e-17		107944017	1.31239	1.48377e-05		107957883	1.21242	1.86892e-06
107937950	1.41024	9.61152e-05		107937526	1.31243	7.33441e-49		107933499	1.21268	1.19131e-05
107946218	1.4107	2.83421e-07		107930248	1.31363	3.08436e-22		107951022	1.21273	6.9958e-67
107941404	1.41166	3.18881e-05		107913958	1.31379	4.51287e-26		107913479	1.21307	1.29511e-13
107943595	1.41174	5.72418e-54		107936994	1.31436	4.48919e-13		107890870	1.21312	3.62902e-65
107897531	1.41177	3.43858e-06		107955970	1.31445	2.41324e-50		107908163	1.2132	4.49456e-11
107951439	1.41188	0		107899765	1.31472	1.88994e-65		107909324	1.21331	1.23985e-14
107886884	1.41277	6.90639e-14		107909101	1.31504	2.53428e-05		107929947	1.21332	3.19552e-10
107901170	1.41325	0.000461563		107959615	1.31595	0		107958503	1.21365	3.04019e-35
107918051	1.41339	4.09429e-05		107891060	1.31722	3.35713e-08		107916809	1.21381	3.47176e-12
107920145	1.41553	6.78432e-20		107890420	1.31767	0.00012329		107954921	1.214	1.72171e-72
107945174	1.41676	0.000239127		107906064	1.31783	3.10779e-42		107894713	1.21415	2.25608e-19
107920769	1.41716	4.88646e-21		107936618	1.31887	1.19864e-155		107961759	1.21429	1.62952e-27
107945578	1.41762	2.72685e-19		107954897	1.31898	1.45867e-07		107957546	1.21435	3.30867e-108
107921361	1.41927	3.22834e-21		107918498	1.32012	7.21473e-07		107921984	1.21482	2.88354e-87
107897607	1.41984	1.03022e-31		107895101	1.32054	0		107918268	1.21558	7.43359e-12
107939715	1.42066	8.48783e-07		107916105	1.32068	1.30826e-57		107910245	1.21613	1.3788e-06
107961647	1.42188	1.65014e-14		107891310	1.32115	6.68446e-24		107933967	1.21718	8.62158e-134
107896759	1.42197	1.73042e-12		107938090	1.32115	3.64861e-06		107937076	1.21724	0
107939639	1.42235	8.72511e-08		107896776	1.32134	3.65041e-31		107888722	1.21747	7.58635e-44
107948556	1.4224	3.91186e-12		107959501	1.32196	3.00801e-05		107946993	1.21754	9.90518e-06
107948077	1.42292	1.33484e-07		107940941	1.32225	2.90687e-31		107933264	1.21821	1.41897e-06
107957996	1.42327	1.80366e-10		107927410	1.32255	8.20151e-17		107899011	1.21852	2.43651e-16
107886956	1.4233	3.81446e-35		107941691	1.32294	8.17518e-14		107902007	1.21872	9.10543e-15
107921111	1.42399	1.39665e-13		107906800	1.32297	1.74013e-21		107953686	1.21876	2.93063e-10
107897812	1.42479	2.02594e-107		107886790	1.32346	2.1901e-44		107887478	1.21941	0.000645114
107955706	1.42486	5.30913e-11		107934864	1.32418	0.000804657		107924150	1.21975	1.57153e-138
107941201	1.4251	0.000267967		107905081	1.32533	3.05217e-14		107925421	1.2199	4.7272e-05
107963689	1.42564	2.38702e-13		107936964	1.32642	0.00010403		107902221	1.22024	1.07178e-33
107907104	1.42613	1.38965e-255		107904179	1.32664	1.27196e-21		107928535	1.22028	7.82527e-16
107959557	1.42624	5.47608e-05		107937101	1.32715	4.58504e-33		107890614	1.22032	1.47623e-183
107909373	1.42663	5.06035e-09		107951442	1.32741	0.000106077		107932852	1.22059	1.87701e-35
107949590	1.42728	7.50147e-24		107948168	1.32775	4.7873e-111		107946411	1.22115	3.06907e-14
107950332	1.42816	8.49285e-08		107936389	1.32862	1.84305e-06		107946281	1.2218	3.3146e-26
107913051	1.42824	4.58407e-28		107962142	1.32882	3.48241e-14		107909094	1.22213	1.21371e-06
107902195	1.42881	2.42785e-11		107950630	1.3289	9.65323e-11		107894982	1.22213	2.79654e-213
107936032	1.42906	0.00087586		107920284	1.32968	1.30436e-15		107898388	1.22219	4.62478e-05
107940866	1.42971	1.03424e-14		107921007	1.33001	7.17152e-10		107946851	1.22241	1.40593e-19
107943897	1.43026	0.000809699		107901566	1.33048	2.09787e-26		107927858	1.22247	0.000174244
107950607	1.43045	3.56925e-43		107932802	1.3308	9.57033e-20		107923328	1.22256	6.68333e-06
107948287	1.43066	2.73686e-26		107905271	1.33132	8.95807e-12		107944845	1.22272	1.0164e-09
107888699	1.43079	1.55859e-20		107899527	1.33184	8.93878e-51		107901194	1.22277	9.11073e-13
107930657	1.43159	1.59546e-17		107906409	1.33333	9.1526e-06		107941587	1.22288	5.10345e-10
107951681	1.43165	0		107907174	1.33385	1.73793e-13		107929177	1.22335	0.000122334
107923995	1.4319	8.76787e-17		107960547	1.33506	0.000484609		107941612	1.22346	3.47675e-28
107898742	1.43212	4.60823e-29		107898623	1.33532	1.11569e-24		107936346	1.22351	9.82476e-10
107932955	1.43218	2.71062e-07		107893538	1.33539	2.57481e-07		107962533	1.22352	3.26262e-119
107914846	1.43246	0.000129357		107950370	1.33539	2.90571e-05		107904130	1.22356	3.08224e-43
107944181	1.43307	1.54154e-12		107905961	1.33552	0		107933111	1.22357	1.00602e-59
107891544	1.43318	1.01255e-05		107926603	1.33674	1.31726e-20		107959549	1.22358	1.13366e-231
107906402	1.43364	8.42134e-278		107962128	1.33777	0.000400071		107890113	1.22368	9.77297e-06
107891751	1.434	0.00023994		107935214	1.33806	2.75132e-40		107906786	1.22386	7.91862e-15
107913865	1.4346	7.704e-187		107897842	1.3392	0		107887396	1.22392	9.99748e-10
107911519	1.43525	0.000158342		107908368	1.33938	1.01506e-05		107911039	1.22412	0.000652651
107951864	1.43549	2.67506e-22		107958430	1.33971	3.41467e-24		107936618	1.2244	1.03181e-129
107953807	1.43555	0.000242209		107892307	1.34154	3.84011e-100		107960821	1.22473	5.12698e-30
107938405	1.43653	4.65983e-48		107960825	1.34163	2.17031e-23		107907399	1.22481	1.86787e-17
107904832	1.43665	4.08676e-76		107931139	1.34181	7.69208e-06		107922575	1.22489	1.02134e-07
107891060	1.43684	9.80385e-10		107922821	1.34211	9.68567e-08		107941069	1.22503	4.78661e-09
107918692	1.43719	3.14285e-14		107914572	1.34213	5.921e-06		107901612	1.22512	7.33326e-74
107888483	1.43766	1.28291e-16		107909946	1.34224	1.14876e-11		107938834	1.22514	4.29272e-19
107954249	1.43815	4.12741e-05		107947350	1.34238	4.41209e-12		107949588	1.2253	1.4805e-44
107937629	1.43822	2.03081e-63		107918412	1.34292	6.5503e-16		107937828	1.22549	4.26437e-55
107889883	1.43832	0.000114196		107953054	1.34319	5.98243e-06		107949518	1.22569	0.000570775
107919411	1.43928	1.02521e-27		107931335	1.34371	0.000924762		107901423	1.22574	8.75681e-145
107962447	1.43947	1.58085e-30		107946361	1.34372	1.82521e-23		107893277	1.22698	4.92537e-10
107940157	1.43996	9.28568e-06		107902014	1.34389	2.14328e-14		107936899	1.2271	2.41285e-170
107947361	1.44033	2.48532e-10		107941529	1.34399	1.14552e-17		107941739	1.22746	0.0003697
107912986	1.44048	2.81781e-23		107920621	1.3444	0		107943653	1.22753	2.5535e-12
107918871	1.44069	0.000254527		107930466	1.34442	2.10398e-111		107886488	1.22797	9.38513e-14
107946588	1.44089	0		107948894	1.34447	1.06205e-05		107932798	1.22833	5.1487e-50
107958455	1.4425	2.66934e-74		107926947	1.34488	0		107913310	1.22836	9.53745e-08
107906303	1.44272	3.0279e-09		107898668	1.34541	0.000925286		107958075	1.22928	1.09544e-05
107963410	1.44359	1.32027e-06		107957721	1.34589	5.8369e-12		107944097	1.2296	7.64806e-141
107960829	1.4436	2.14381e-05		107915011	1.34659	2.39758e-11		107958287	1.22965	1.83782e-20
107931825	1.4441	6.55112e-21		107887771	1.34659	2.2904e-05		107935407	1.2297	3.3869e-50
107960896	1.44509	4.42297e-20		107943586	1.34772	0.000871249		107914738	1.23081	2.31882e-111
107940545	1.44568	2.26404e-229		107930835	1.34788	1.38179e-59		107945344	1.23104	1.11518e-05
107944676	1.44656	0.000239316		107886610	1.34791	0		107918670	1.23112	0.000462004
107925705	1.44888	1.72722e-06		107936128	1.34871	8.98584e-152		107942104	1.2312	0.000286078
107892610	1.4491	2.55557e-28		107954364	1.34964	4.7346e-123		107906408	1.2313	2.31146e-159
107939906	1.44914	5.79129e-46		107933590	1.3508	2.20651e-39		107904072	1.23178	2.59091e-121
107929189	1.44937	4.22151e-71		107916729	1.35128	6.0826e-46		107928354	1.23195	2.3841e-44
107940220	1.45095	4.72029e-15		107945225	1.35155	2.35492e-20		107923981	1.23195	9.65053e-08
107943995	1.45107	0.000896764		107962216	1.35162	1.61692e-26		107904044	1.23201	1.96955e-09
107927553	1.4511	5.26968e-47		107902146	1.35247	2.08156e-08		107937629	1.23208	8.32089e-44
107903872	1.45174	1.6604e-05		107898646	1.35251	0.000107772		107933091	1.2324	4.27026e-171
107948141	1.45216	1.60097e-05		107924736	1.35263	2.1428e-87		107959187	1.23259	2.74432e-69
107957357	1.453	5.59453e-78		107937088	1.35304	1.90841e-06		107962979	1.23325	1.5587e-37
107928230	1.45458	3.88402e-33		107888320	1.3542	2.90869e-06		107918485	1.23326	1.75564e-72
107907513	1.4546	3.7434e-09		107932278	1.35455	9.7752e-11		107888374	1.23348	4.75536e-09
107936247	1.45557	0		107929871	1.3547	0.00024585		107895995	1.23351	5.93081e-09
107891614	1.45683	2.68579e-10		107899271	1.35734	7.33581e-08		107951199	1.23381	0.000667562
107896883	1.45705	5.38832e-15		107914300	1.35752	8.39101e-76		107911137	1.23431	0
107959430	1.4573	2.10738e-06		107931069	1.35759	7.97827e-39		107916344	1.23451	0.000143091
107940947	1.45738	1.02958e-24		107948599	1.35792	6.95205e-42		107935784	1.235	5.68065e-66
107916535	1.458	1.58766e-27		107936158	1.35807	1.38236e-08		107903553	1.23506	2.84438e-13
107934465	1.46037	4.6025e-34		107919247	1.3581	2.39012e-19		107900834	1.2353	1.95486e-05
107958713	1.46053	4.47414e-12		107951172	1.3586	4.11769e-07		107929896	1.23567	1.19088e-29
107924212	1.46175	8.17355e-27		107948816	1.35861	1.36631e-09		107924989	1.23572	1.91228e-09
107946011	1.46192	3.05083e-33		107904491	1.35862	8.69676e-19		107924574	1.23583	1.02255e-86
107946980	1.46265	1.00131e-41		107887042	1.35879	0.000566077		107958025	1.23585	1.16294e-07
107950330	1.46274	3.37289e-78		107932296	1.35923	3.97828e-05		107936367	1.23592	9.19313e-170
107961713	1.46359	3.16266e-95		107903674	1.36008	7.73375e-07		107932889	1.23593	5.39839e-08
107944957	1.46363	2.6034e-20		107925067	1.36036	7.63067e-05		107959168	1.23654	3.88901e-19
107946804	1.46556	0.000164057		107944511	1.36071	2.97353e-166		107953590	1.23674	1.12625e-14
107953341	1.4664	5.39881e-09		107947361	1.361	3.08529e-09		107958505	1.23682	7.02052e-91
107932189	1.46655	7.42633e-46		107936176	1.36129	2.65794e-22		107906946	1.23689	7.55868e-226
107942637	1.46746	1.60197e-26		107937605	1.36155	1.23085e-34		107906889	1.23723	1.76784e-14
107897846	1.46765	5.56754e-29		107904499	1.36168	1.07556e-10		107960483	1.23735	4.9641e-12
107910501	1.46871	8.25919e-26		107900461	1.36221	8.07565e-07		107948207	1.23757	3.94194e-17
107916337	1.46876	1.0492e-135		107936608	1.36222	0		107932232	1.23769	1.60456e-09
107963069	1.46901	4.7347e-05		107912567	1.36224	6.31842e-28		107925140	1.23776	1.18938e-51
107927815	1.46979	7.68912e-18		107899606	1.36251	3.3537e-167		107886690	1.2382	4.58952e-14
107929751	1.46994	6.48393e-05		107893031	1.36253	1.14973e-31		107896753	1.23872	6.77441e-05
107915166	1.47008	1.47487e-07		107905402	1.3628	6.94571e-223		107892843	1.23924	8.61165e-05
107946661	1.47123	1.44529e-185		107907531	1.36299	4.11589e-13		107907200	1.23956	6.93021e-13
107952360	1.47128	0.000488506		107909016	1.3631	1.83502e-07		107909353	1.23972	7.25262e-47
107899125	1.47139	4.72165e-32		107912643	1.36341	9.71574e-05		107933251	1.23973	4.37187e-49
107925253	1.47157	1.26061e-26		107914566	1.36353	7.37802e-34		107902465	1.23998	1.43655e-46
107947850	1.47515	8.21045e-22		107914538	1.36448	0		107933529	1.24005	5.2431e-31
107886052	1.47546	2.01717e-47		107897115	1.36454	8.74183e-06		107954603	1.24129	8.0734e-56
107896693	1.47548	0		107907179	1.36472	5.79093e-13		107958726	1.24206	7.24399e-38
107947211	1.47548	1.01681e-11		107894193	1.36481	0		107909811	1.24221	3.35521e-06
107946832	1.47854	4.13406e-10		107952949	1.36482	2.43869e-05		107957696	1.24242	3.7547e-12
107905393	1.47873	1.6967e-30		107925716	1.36762	8.88208e-36		107963768	1.24302	2.45429e-33
107918519	1.47942	1.02968e-15		107888326	1.36817	3.54707e-300		107933562	1.24345	1.02713e-90
107930303	1.47965	3.02728e-07		107899358	1.36971	6.67157e-230		107962830	1.24355	1.43063e-28
107930224	1.48048	0.000257947		107937460	1.37023	5.71345e-124		107904848	1.2437	1.08916e-16
107948257	1.48215	1.69032e-06		107929601	1.37047	9.57004e-22		107925091	1.24375	2.34777e-08
107937795	1.48233	4.18464e-20		107929382	1.37063	0		107951391	1.24392	2.61301e-17
107893151	1.4829	0		107934096	1.37134	2.78897e-36		107949462	1.24416	0
107954515	1.48314	7.91439e-08		107930231	1.37178	0.000505047		107909771	1.2442	6.43751e-21
107916465	1.48345	0.000929429		107945556	1.37228	8.97372e-09		107954681	1.24497	2.19756e-18
107922883	1.48444	3.58298e-31		107911590	1.3723	6.653e-14		107916449	1.24507	4.34566e-94
107930890	1.48493	1.18176e-11		107951987	1.37256	7.59722e-24		107941934	1.24507	4.78209e-131
107904067	1.48581	1.26082e-108		107886437	1.37282	8.27064e-19		107925953	1.24535	2.44505e-299
107915034	1.48598	5.77483e-08		107933793	1.37324	0		107936350	1.2456	4.57401e-35
107950152	1.48648	0.000520873		107926263	1.37401	6.42975e-11		107958084	1.24565	3.47975e-07
107893607	1.48683	3.45454e-17		107902836	1.37409	5.05481e-42		107946606	1.24593	6.03992e-12
107945170	1.48737	1.05947e-32		107912400	1.3742	0.000281366		107954198	1.24693	0.000101133
107922114	1.48753	1.04631e-38		107946833	1.37435	5.55175e-46		107904680	1.24702	3.49876e-23
107899713	1.48759	3.36234e-101		107952037	1.37435	5.55175e-46		107930952	1.24707	5.12985e-07
107921197	1.48782	2.51951e-16		107955713	1.3744	2.87978e-10		107920453	1.24711	7.46274e-50
107896242	1.48813	1.28336e-28		107934244	1.37534	9.03918e-109		107943010	1.24713	3.09339e-05
107929347	1.48816	1.02734e-07		107957765	1.37542	2.61587e-29		107913882	1.24722	0
107933755	1.48829	8.2179e-05		107926131	1.3755	2.43555e-10		107891824	1.24724	1.94846e-36
107889550	1.4883	1.38324e-81		107953895	1.376	2.19438e-20		107900285	1.24739	2.1588e-07
107929452	1.48882	1.53445e-09		107941561	1.37603	9.13208e-05		107930883	1.2477	1.73526e-05
107914036	1.48947	9.4424e-20		107924935	1.37686	1.29651e-16		107922938	1.24787	3.42349e-10
107887594	1.49023	2.04637e-05		107891532	1.37699	2.38271e-09		107891794	1.24834	2.70442e-08
107942609	1.49035	7.41219e-10		107938831	1.37726	1.09807e-05		107930359	1.24882	4.44215e-166
107905805	1.49049	3.75914e-17		107943715	1.37746	1.97454e-05		107901947	1.24889	2.84865e-07
107937916	1.49157	1.11461e-08		107931343	1.37764	0.000692153		107912180	1.24924	2.53402e-62
107936698	1.49175	0		107941524	1.37773	1.89389e-11		107895419	1.2499	3.67661e-07
107890834	1.49195	6.28712e-46		107953898	1.37775	0.000128482		107928646	1.25027	3.43014e-05
107898064	1.49244	7.02555e-28		107954398	1.37786	3.10027e-10		107905828	1.25083	4.85608e-09
107943055	1.49273	1.4843e-22		107944222	1.37823	3.31162e-05		107911049	1.25093	0.000114956
107900764	1.49425	8.55218e-58		107937779	1.3783	8.6374e-99		107918037	1.25146	4.71775e-09
107904041	1.49428	4.35102e-12		107885984	1.37856	1.09835e-09		107898623	1.25164	1.76456e-21
107904043	1.49428	4.35102e-12		107895998	1.37874	0.000873037		107889782	1.25171	2.0306e-58
107904887	1.49461	5.31759e-07		107932359	1.37931	2.19643e-08		107937630	1.25179	2.1147e-07
107943340	1.49469	6.11023e-05		107937789	1.37935	1.674e-37		107896347	1.25219	0.000379447
107923391	1.49539	1.85728e-08		107887408	1.37977	0		107929801	1.25239	0.000112376
107934375	1.49698	0.000358029		107938586	1.37999	1.92418e-145		107959346	1.25239	3.50158e-14
107948921	1.49713	5.12194e-07		107899541	1.38035	2.26252e-05		107942309	1.25281	1.26178e-153
107937456	1.49782	5.66844e-170		107927652	1.38079	5.87497e-05		107915570	1.25334	4.7977e-08
107939781	1.49822	1.72552e-39		107909964	1.38116	2.694e-09		107929542	1.25382	2.50808e-154
107904134	1.49872	4.12781e-66		107928543	1.38188	0		107924815	1.254	0
107896327	1.49893	2.53262e-07		107904615	1.38296	1.0327e-23		107933508	1.25404	2.09341e-43
107926548	1.49942	8.43401e-16		107939393	1.38357	4.5445e-07		107894111	1.25407	5.36547e-37
107910357	1.49945	2.86312e-10		107891751	1.3836	0.000359388		107902745	1.25444	4.71751e-10
107939719	1.49978	3.94317e-14		107907251	1.38368	2.44138e-86		107951255	1.25466	2.90409e-20
107942680	1.49998	1.46426e-06		107958635	1.3839	4.2179e-61		107902014	1.25469	1.26796e-12
107962515	1.50053	1.25575e-21		107943160	1.38423	1.95724e-05		107936940	1.25479	1.66512e-42
107940782	1.5008	3.95173e-05		107954312	1.38427	4.02166e-51		107961819	1.25494	0.000124602
107942855	1.50089	5.8223e-09		107901002	1.38433	1.60428e-138		107914087	1.25497	6.00558e-103
107953898	1.50128	2.69568e-05		107888722	1.38437	2.08309e-59		107948964	1.25524	4.54993e-17
107925560	1.50163	0.000165731		107889550	1.38576	2.5357e-68		107939950	1.25554	3.26543e-05
107914748	1.50263	5.33375e-110		107941827	1.38583	4.41698e-97		107887166	1.25575	2.02799e-66
107946626	1.50279	1.88079e-208		107951627	1.3859	2.01407e-07		107954744	1.25582	0
107896994	1.50326	6.64101e-35		107913035	1.38604	6.09584e-06		107948165	1.25612	6.56872e-14
107897579	1.50445	1.86083e-06		107913881	1.38681	0		107935946	1.25618	3.01487e-51
107932356	1.50454	3.44594e-24		107948442	1.38712	3.98772e-73		107929323	1.25628	7.86752e-43
107957768	1.50498	1.4688e-44		107918150	1.38743	2.38844e-45		107890741	1.25679	5.17732e-83
107906901	1.50595	3.89805e-194		107920440	1.38753	1.42398e-21		107916934	1.25775	2.28956e-19
107946937	1.50644	0.00096128		107908829	1.38786	8.87579e-14		107938099	1.25893	1.23037e-174
107897218	1.50719	3.09505e-05		107957758	1.38883	9.17835e-05		107963794	1.25913	1.55141e-12
107917544	1.50745	0.000603743		107890783	1.38894	1.56892e-41		107953603	1.25964	1.01124e-303
107941919	1.50783	4.67367e-11		107928227	1.38906	2.92053e-13		107893967	1.25967	2.84877e-14
107923030	1.50891	1.84265e-07		107909482	1.38943	3.32265e-49		107913323	1.25986	6.35922e-83
107941718	1.5094	2.3813e-05		107910432	1.39096	0.000415469		107934066	1.26056	5.63855e-12
107963828	1.51051	1.6518e-115		107951127	1.39105	0.000227627		107954595	1.26116	4.02713e-112
107962199	1.51086	2.64399e-75		107933841	1.39147	4.78581e-168		107950129	1.26138	1.46127e-23
107947488	1.51164	1.48318e-19		107940647	1.39162	2.83624e-17		107963385	1.26157	4.09936e-06
107933072	1.51212	7.48671e-07		107963828	1.39188	4.49218e-94		107958870	1.26161	2.34164e-12
107931072	1.51213	1.42284e-09		107951704	1.39197	2.34651e-23		107939727	1.2617	4.26752e-17
107902465	1.51225	2.96126e-75		107907513	1.39207	1.97416e-08		107941290	1.26184	3.37389e-05
107914848	1.51288	4.8723e-36		107937185	1.39322	1.09897e-07		107887015	1.26205	2.45377e-43
107900757	1.51314	3.22195e-92		107942159	1.39336	2.2742e-42		107892370	1.26248	0.000589657
107910531	1.51418	0		107915231	1.394	1.33802e-24		107960840	1.26267	0
107918787	1.51444	7.32429e-11		107945482	1.39471	1.16369e-14		107931828	1.26306	1.78956e-26
107942763	1.51452	3.22954e-07		107899542	1.39534	1.43991e-96		107960396	1.2631	1.02847e-239
107927857	1.51495	7.70536e-29		107958334	1.39564	7.00499e-07		107895903	1.26312	1.0925e-40
107912186	1.51627	2.79011e-05		107962913	1.39565	4.43038e-70		107963648	1.26351	2.06861e-09
107891008	1.51703	1.61956e-20		107922714	1.39572	3.68537e-19		107929968	1.26365	3.173e-05
107885979	1.51723	5.12601e-21		107932306	1.39657	8.28765e-05		107915113	1.26412	1.04971e-125
107888374	1.51751	1.16073e-13		107959617	1.39714	2.27505e-34		107945873	1.26455	6.08949e-36
107951788	1.51775	4.85571e-10		107905345	1.39737	3.55902e-08		107917856	1.2647	1.43112e-06
107928535	1.518	1.08213e-25		107941430	1.39775	2.25591e-104		107910605	1.26476	2.51894e-122
107910925	1.51847	2.29341e-29		107906040	1.39788	9.0851e-28		107919998	1.26525	7.98607e-225
107927819	1.51885	4.36702e-19		107886411	1.39837	1.2482e-06		107940318	1.26527	6.83917e-06
107934848	1.51949	1.97495e-28		107962452	1.39919	1.69018e-10		107925281	1.2653	6.64989e-24
107888416	1.52039	7.16787e-81		107947139	1.40019	1.40857e-05		107945812	1.26532	2.86959e-06
107962463	1.52105	1.96585e-30		107948858	1.40039	0.000963881		107959656	1.266	8.69031e-18
107960210	1.52272	3.29384e-16		107904203	1.40067	9.54493e-13		107893208	1.26614	1.87195e-16
107949423	1.52517	7.03583e-83		107930707	1.40155	0.000208304		107946011	1.26621	6.07602e-24
107930954	1.52539	1.07403e-65		107925636	1.40156	0		107952072	1.26652	4.3052e-07
107947291	1.52626	2.44684e-08		107898749	1.4025	2.42919e-15		107950503	1.26654	0
107948206	1.52822	1.61034e-12		107913573	1.40278	4.84536e-07		107946986	1.26665	2.37949e-09
107905102	1.52829	6.23043e-58		107931636	1.40327	5.16279e-50		107943014	1.26687	0.000273957
107889716	1.52837	2.68103e-18		107904777	1.40341	4.65549e-11		107890078	1.26702	7.10985e-77
107961750	1.52865	1.02512e-118		107922282	1.40349	7.92452e-249		107942267	1.26736	9.02616e-09
107892218	1.52878	4.72969e-06		107931384	1.40407	6.26751e-17		107920464	1.26743	2.42762e-20
107897770	1.52963	1.22997e-29		107944185	1.40485	5.4264e-21		107899045	1.26753	4.49813e-13
107929377	1.53028	3.4525e-09		107934793	1.40508	9.85535e-60		107944181	1.26789	6.05304e-10
107902890	1.53045	5.49658e-09		107904191	1.40644	3.87593e-103		107910027	1.26806	9.44793e-14
107943253	1.53062	5.68535e-20		107917008	1.40705	2.06423e-12		107945261	1.26827	8.01832e-08
107952463	1.53074	3.37825e-37		107943281	1.40717	2.72828e-151		107912315	1.26829	0
107957349	1.531	3.28596e-144		107915320	1.40729	1.84498e-130		107955970	1.26841	2.38623e-46
107909789	1.53118	4.38073e-22		107929260	1.40801	6.58042e-10		107960965	1.26849	1.4103e-100
107913880	1.5314	2.52694e-136		107895265	1.40893	1.39225e-122		107908605	1.269	7.43814e-45
107940950	1.53246	1.65315e-21		107962848	1.40917	1.77266e-49		107951592	1.26954	1.10688e-23
107901070	1.53327	1.66813e-11		107891006	1.40931	2.71798e-20		107941524	1.26954	7.24694e-10
107925542	1.53362	1.21906e-11		107933923	1.40932	1.71556e-07		107900770	1.26958	6.37633e-188
107911898	1.53387	7.51605e-06		107958720	1.40949	3.50317e-32		107911988	1.27016	1.56057e-23
107962556	1.53403	3.38873e-07		107933304	1.41034	2.67547e-06		107963636	1.27027	0.000311812
107943781	1.53438	1.56688e-83		107942214	1.41044	5.93186e-07		107958180	1.2703	2.35575e-05
107920078	1.53484	7.97998e-16		107936906	1.4108	0		107933614	1.27036	9.65986e-41
107954637	1.53598	9.19621e-13		107923988	1.41102	8.60704e-78		107899181	1.27049	1.14471e-11
107913538	1.53682	4.90918e-10		107929452	1.41153	1.32289e-08		107938181	1.27049	3.0386e-05
107910610	1.53709	8.41666e-12		107890972	1.41155	3.89452e-09		107938183	1.27049	3.0386e-05
107962609	1.53732	5.18766e-66		107925421	1.41222	2.72195e-06		107911952	1.27095	6.26747e-40
107904349	1.53757	8.27562e-54		107925509	1.41244	9.49449e-32		107926131	1.27119	5.19962e-09
107958210	1.53766	1.84475e-16		107905982	1.41278	2.73376e-29		107899748	1.27132	2.49054e-05
107943014	1.53834	1.26647e-05		107904349	1.41311	9.49864e-44		107928986	1.27137	7.50167e-15
107934587	1.53859	2.18962e-30		107905823	1.41335	3.49665e-51		107921085	1.27139	5.65511e-52
107900860	1.53901	5.76378e-06		107943613	1.41347	0.000337693		107908304	1.27151	3.37441e-05
107902601	1.53933	9.37788e-37		107923100	1.41401	1.20963e-31		107932103	1.27156	6.40634e-13
107908784	1.53949	7.56381e-14		107925227	1.4144	0.0001634		107921105	1.27163	3.46792e-19
107931868	1.53991	1.4915e-13		107954767	1.41588	3.77782e-05		107942224	1.27189	2.14926e-06
107947319	1.5407	1.73142e-14		107961891	1.41626	1.14852e-23		107887016	1.2721	6.40959e-124
107945232	1.542	4.44911e-14		107899391	1.41706	1.66026e-13		107915034	1.27227	3.55975e-06
107910411	1.54211	2.50216e-64		107951095	1.41785	3.57253e-38		107951932	1.27264	2.09664e-58
107940614	1.54262	2.83317e-193		107960302	1.41815	2.95439e-79		107931630	1.27265	1.93829e-90
107923560	1.54262	0		107922616	1.41827	3.62979e-66		107894334	1.27275	8.8286e-83
107918078	1.54335	1.93598e-160		107891328	1.41878	0		107902852	1.27275	4.58053e-11
107920686	1.54396	2.92137e-50		107938403	1.41939	3.41648e-42		107924921	1.27275	8.59217e-21
107946895	1.54436	3.67694e-70		107946922	1.41939	3.41648e-42		107927782	1.27333	3.18519e-06
107958223	1.54457	4.24584e-10		107915034	1.41974	2.4358e-07		107951467	1.27358	1.29044e-05
107902014	1.54634	9.08793e-20		107909924	1.42103	6.35446e-11		107939588	1.27363	8.18929e-73
107911706	1.54648	3.34871e-196		107963898	1.42108	3.3872e-16		107903965	1.27473	0.000905379
107953935	1.54691	0		107907430	1.42132	3.2086e-46		107924316	1.27481	2.09522e-09
107909795	1.54743	3.05558e-78		107903236	1.42154	6.67065e-06		107960045	1.27491	0.000172792
107913815	1.54789	4.78402e-207		107913665	1.42155	5.06038e-11		107929502	1.27525	1.47174e-38
107954862	1.54838	0.000138125		107912819	1.42195	3.77652e-45		107895192	1.27584	0
107891152	1.54894	9.72086e-12		107942668	1.4238	3.69595e-41		107893025	1.2765	1.44274e-12
107941430	1.54908	3.6093e-135		107927660	1.42416	9.41468e-07		107904788	1.27659	9.42791e-17
107960681	1.54931	2.25258e-06		107930195	1.42439	1.07333e-31		107958704	1.27706	9.76544e-42
107945134	1.54963	1.67619e-160		107928636	1.42458	6.94064e-17		107888457	1.27737	0.000487317
107942214	1.5497	2.47009e-08		107910612	1.42493	3.48515e-48		107937996	1.27741	0.000936282
107912896	1.55018	5.62722e-143		107926764	1.42544	6.02594e-19		107897900	1.27745	4.96187e-17
107954903	1.55167	3.56235e-35		107893151	1.42562	0		107961760	1.27749	2.40428e-19
107917871	1.55191	0.000452997		107953731	1.42602	0		107950142	1.27753	1.26405e-103
107897092	1.55448	0		107933088	1.42616	2.2494e-08		107940293	1.27772	3.5031e-80
107899323	1.55464	4.48379e-09		107937354	1.42643	1.75911e-27		107955339	1.27793	4.04051e-05
107937628	1.55476	1.54599e-175		107912377	1.42713	4.12965e-131		107929596	1.27825	6.46645e-25
107922551	1.55523	1.02816e-17		107933480	1.42742	3.00215e-119		107928976	1.2788	6.95033e-08
107954990	1.55541	1.28426e-06		107953798	1.42835	3.59536e-228		107899041	1.27901	7.5512e-254
107895101	1.55558	0		107959601	1.42835	1.04314e-07		107963766	1.27904	9.8698e-05
107947156	1.55603	1.24444e-246		107904740	1.42868	2.71597e-13		107894609	1.27945	3.19937e-32
107945530	1.55812	0.000999205		107929293	1.42884	1.07967e-69		107913589	1.28003	2.3888e-09
107948552	1.55886	2.76856e-209		107905558	1.43027	4.4994e-96		107898991	1.28038	0
107937885	1.55996	3.52145e-07		107907068	1.43066	4.54499e-05		107946931	1.2804	6.57642e-45
107900494	1.56002	9.37789e-90		107946986	1.43068	8.54158e-12		107918600	1.28053	7.35997e-68
107936157	1.5602	1.49025e-08		107891440	1.4308	1.00785e-23		107886894	1.28085	3.22474e-17
107940712	1.56079	3.75616e-200		107938898	1.43115	1.01191e-07		107908453	1.28096	1.57357e-176
107903744	1.56149	2.6679e-19		107938793	1.43236	2.82683e-05		107941561	1.28102	0.000190786
107940464	1.56155	1.27717e-83		107925310	1.43317	9.14152e-42		107958592	1.28108	7.67612e-10
107960739	1.56208	8.87616e-31		107924499	1.43319	1.54566e-27		107919346	1.28119	0
107940149	1.56234	1.85345e-34		107952325	1.43328	1.5778e-05		107915537	1.2813	0
107956208	1.56387	9.21737e-07		107903965	1.43339	0.000280394		107933004	1.28246	2.63551e-113
107891931	1.56458	4.16055e-46		107936524	1.43339	6.20901e-85		107912794	1.28309	2.28833e-05
107906030	1.5654	5.25938e-41		107938331	1.43344	7.6894e-06		107896591	1.28333	9.96863e-39
107947295	1.56588	3.08032e-08		107946931	1.43357	8.78482e-59		107934702	1.28342	0.000105565
107913573	1.56678	9.61928e-09		107940866	1.43383	6.95614e-15		107912783	1.28376	1.96845e-25
107945823	1.5694	1.19583e-105		107948312	1.4346	5.04702e-105		107929863	1.28385	9.57724e-57
107933949	1.57033	2.837e-60		107929577	1.43569	7.72416e-06		107905961	1.28402	0
107909326	1.57162	2.12281e-10		107952260	1.43683	0.000711678		107913063	1.28456	4.60653e-58
107937173	1.57234	1.7714e-117		107942873	1.43703	8.11547e-37		107962348	1.28523	1.44889e-75
107933200	1.57252	4.2587e-58		107932354	1.43764	1.14989e-29		107913693	1.28564	2.0592e-06
107925746	1.57253	1.91263e-52		107908304	1.43831	3.14467e-06		107900796	1.28624	1.72023e-08
107896798	1.57317	4.61588e-16		107937629	1.439	2.14141e-63		107908596	1.28627	3.77131e-52
107899567	1.5732	2.36867e-62		107903513	1.43938	2.91193e-06		107905437	1.28654	3.52655e-14
107922990	1.57341	7.06407e-78		107957193	1.44062	2.67518e-16		107942290	1.28664	3.59098e-07
107934228	1.57388	7.0466e-136		107947645	1.44067	8.71581e-06		107901864	1.28714	3.90992e-08
107891983	1.57587	1.45389e-15		107957181	1.44072	2.31796e-275		107958902	1.28731	7.96285e-36
107909548	1.57607	3.33158e-135		107949154	1.44084	3.19025e-59		107904470	1.28736	1.8109e-24
107891777	1.57651	2.01919e-28		107886953	1.44155	3.93704e-06		107935991	1.28785	0
107933616	1.57698	7.18395e-09		107957957	1.44196	0		107925368	1.28793	7.11119e-05
107905877	1.57851	1.24213e-35		107926352	1.44277	4.59297e-17		107960643	1.28822	6.16326e-76
107912056	1.57898	1.79476e-15		107939658	1.44289	3.58687e-29		107893139	1.28827	0
107963481	1.58025	0.000931734		107912227	1.44321	3.37375e-06		107899504	1.2883	2.76137e-43
107940616	1.58105	1.01564e-13		107957851	1.44357	3.11251e-19		107885984	1.28846	1.1649e-08
107942329	1.58112	3.87872e-23		107935544	1.44369	8.76603e-13		107933590	1.28847	2.306e-35
107930876	1.58146	6.8304e-17		107940083	1.44443	5.28263e-06		107933591	1.28924	5.65322e-169
107920311	1.58224	2.52094e-14		107958297	1.44483	2.17784e-27		107902717	1.28964	1.53316e-14
107937162	1.58235	1.152e-11		107948982	1.44491	2.43518e-66		107937174	1.28972	2.7957e-36
107933628	1.5827	3.63911e-12		107957172	1.44494	7.87156e-39		107900620	1.28979	2.78915e-45
107915307	1.5834	5.77542e-05		107943801	1.44509	1.9403e-80		107886610	1.29069	0
107954256	1.5834	0.000272862		107899565	1.4456	1.34751e-31		107948772	1.29087	9.77849e-216
107904941	1.58401	1.06106e-06		107939089	1.44576	6.69542e-05		107904138	1.29093	2.16805e-76
107899541	1.58457	6.53953e-07		107960107	1.44602	1.21978e-164		107904984	1.29102	0
107907200	1.58576	4.62091e-22		107893717	1.44698	0		107923988	1.29119	9.00131e-63
107931594	1.58678	2.87216e-12		107943316	1.44726	2.33808e-11		107912386	1.29152	9.50139e-274
107955604	1.5886	4.12338e-23		107908485	1.44731	0		107910546	1.29185	7.15851e-24
107913241	1.58912	9.80233e-10		107901034	1.44762	2.66223e-33		107913101	1.29186	7.27921e-11
107953370	1.59073	0.000241462		107912896	1.44767	3.99364e-120		107916357	1.29228	4.23074e-07
107890452	1.59128	2.18327e-05		107953917	1.44809	7.4193e-18		107943707	1.2924	2.61589e-18
107922624	1.59133	0		107915412	1.44878	0		107928813	1.29252	4.25954e-07
107944972	1.5915	2.46108e-38		107945928	1.44886	9.51974e-44		107954344	1.29283	1.55298e-14
107888962	1.59204	1.03205e-204		107942353	1.4492	1.72958e-42		107924238	1.29291	6.55537e-16
107936221	1.59328	1.53929e-14		107947114	1.44932	8.08123e-29		107903170	1.29307	0.000530657
107938833	1.59392	0.000571239		107936377	1.4494	1.63959e-74		107948990	1.29326	5.86242e-05
107922583	1.59595	1.33091e-116		107914313	1.44973	0		107914566	1.2934	4.50781e-30
107925296	1.59622	4.57998e-24		107917076	1.44977	7.24374e-12		107889459	1.29341	3.88652e-20
107900735	1.5981	9.36681e-21		107902220	1.45083	1.765e-31		107904251	1.29367	7.1752e-76
107916766	1.59855	8.72567e-29		107952463	1.452	9.44366e-33		107904952	1.29396	8.55579e-41
107942781	1.59859	4.73245e-52		107932952	1.452	0.000513982		107958101	1.2941	1.06484e-75
107921118	1.59971	8.59595e-58		107944461	1.45263	0.000841378		107958074	1.29414	1.25268e-22
107931697	1.60017	5.20903e-08		107910748	1.45292	2.99554e-35		107945351	1.29464	1.13502e-07
107930965	1.60047	2.73712e-14		107921118	1.45409	1.23951e-45		107892037	1.29473	2.00915e-39
107891420	1.60048	9.21992e-08		107891132	1.45421	3.35854e-15		107906616	1.29516	4.44358e-164
107941594	1.60159	8.26333e-10		107918988	1.45445	2.57819e-25		107949029	1.29552	2.57088e-06
107909507	1.60175	0.000443674		107948996	1.45476	3.77598e-58		107954816	1.29604	4.28974e-77
107940012	1.60189	2.84629e-06		107958810	1.45479	3.09728e-38		107906668	1.29609	1.35316e-24
107913310	1.60234	4.22032e-13		107909699	1.45534	0		107957666	1.29614	1.39241e-10
107927017	1.60388	1.53179e-45		107938221	1.45588	0		107938223	1.29621	6.40072e-45
107923518	1.60416	1.0429e-06		107931807	1.45606	0		107900505	1.29704	5.22973e-19
107958559	1.60582	3.47126e-60		107919589	1.45647	3.33724e-50		107939837	1.29711	1.68315e-131
107953989	1.60586	1.21655e-75		107908980	1.45662	6.55663e-105		107901993	1.29714	1.48748e-20
107918605	1.60587	8.79539e-05		107924209	1.4569	0		107939805	1.2973	1.13605e-20
107898772	1.60706	3.58964e-16		107895449	1.45756	2.78014e-09		107911181	1.29752	0.000405812
107953917	1.60709	9.53486e-23		107945390	1.45758	1.03801e-113		107905168	1.2978	9.35686e-24
107932306	1.60713	3.74966e-06		107947295	1.45798	3.42445e-07		107946474	1.29814	2.66418e-40
107959346	1.60751	1.07274e-24		107897607	1.45814	7.95604e-34		107917536	1.29829	7.86582e-07
107909159	1.60753	1.25689e-06		107948206	1.45834	2.32056e-11		107920284	1.29875	4.8282e-15
107951095	1.60776	6.00775e-52		107908508	1.45854	1.72792e-30		107951464	1.29875	0
107955752	1.60842	3.34206e-05		107951513	1.45965	5.10619e-12		107937488	1.29884	1.7683e-17
107930979	1.60849	8.21819e-06		107907200	1.4597	3.24798e-18		107938941	1.29968	2.61914e-07
107912356	1.60876	4.8681e-257		107943981	1.45987	0.000718106		107955842	1.29998	3.8735e-05
107910198	1.60909	1.99738e-124		107928181	1.46008	1.18235e-08		107930083	1.30011	1.12319e-18
107892424	1.60943	0.000185891		107935955	1.46037	1.54279e-08		107920654	1.30013	0
107946664	1.60958	3.88876e-22		107923806	1.46072	8.37312e-25		107912592	1.30029	6.72699e-94
107940457	1.61128	1.21122e-32		107897846	1.46077	1.07036e-28		107886977	1.30034	5.2962e-08
107908753	1.61141	2.3045e-05		107907133	1.46108	4.47383e-12		107936049	1.30035	3.77683e-10
107891341	1.61154	0.000594538		107902235	1.46188	0.000418486		107958723	1.30066	1.85731e-168
107952296	1.61304	0.000727823		107959871	1.46224	0		107949402	1.30071	3.1291e-37
107903675	1.61304	1.78732e-06		107932589	1.46236	8.43066e-20		107892307	1.30086	8.44017e-93
107908940	1.61322	2.65695e-228		107902714	1.46249	5.21153e-69		107934228	1.30088	1.44017e-84
107914629	1.61345	2.27308e-06		107893461	1.46279	0.000281349		107929200	1.30115	4.03847e-14
107896971	1.61352	2.47594e-09		107893394	1.46281	4.87156e-95		107909911	1.30172	1.17231e-101
107914288	1.61354	3.11813e-133		107888580	1.46321	4.93585e-214		107897473	1.302	1.86528e-18
107895961	1.6141	1.12102e-08		107940104	1.46331	5.89441e-22		107916447	1.30249	7.22228e-70
107929866	1.61456	1.18592e-27		107960394	1.46351	3.50806e-18		107890067	1.30257	1.70444e-51
107912107	1.61735	0.00010853		107907023	1.46356	2.41693e-05		107899168	1.30266	2.38407e-77
107914237	1.61802	7.18339e-33		107962982	1.46506	5.99779e-68		107906355	1.30294	4.604e-79
107891749	1.6185	1.01264e-146		107921113	1.4656	3.39705e-14		107935476	1.30331	2.2844e-44
107899475	1.61956	2.25685e-86		107921192	1.4657	1.0381e-75		107946690	1.30335	5.01763e-176
107949499	1.62055	4.32618e-19		107958559	1.46612	5.19594e-48		107933297	1.30368	5.02525e-51
107918037	1.6207	2.08391e-15		107940271	1.46632	1.74756e-06		107943650	1.30437	9.45547e-08
107910432	1.62217	2.73627e-05		107913882	1.46787	0		107886442	1.30448	1.43104e-101
107925948	1.62296	8.68551e-07		107921200	1.46868	7.88789e-67		107929883	1.30454	1.69571e-05
107905893	1.62546	9.67424e-19		107956208	1.4703	4.54618e-06		107924946	1.30467	6.52489e-13
107955730	1.62581	0		107938293	1.47038	0.000562302		107940335	1.30478	0.000156487
107939727	1.62587	1.76014e-30		107958655	1.47111	0.00047136		107946034	1.30501	3.18553e-27
107910732	1.6259	9.11403e-35		107948750	1.4719	0.000208213		107943820	1.30545	4.87258e-78
107940890	1.62644	2.13254e-126		107946586	1.47242	5.17268e-105		107888416	1.30546	1.07745e-55
107942205	1.62651	0.000896073		107913562	1.47286	1.46627e-92		107897731	1.30549	7.76933e-24
107931620	1.62732	9.07809e-48		107915793	1.47289	3.99725e-23		107887449	1.30594	2.3456e-104
107915821	1.62751	6.19848e-24		107951536	1.47293	3.84642e-192		107905003	1.30595	1.31772e-30
107940946	1.62827	7.11193e-20		107953117	1.47296	3.77311e-05		107938712	1.30606	2.71795e-80
107914091	1.62946	7.18799e-38		107909373	1.47381	9.35038e-10		107890544	1.30616	1.0982e-09
107921306	1.62969	6.45759e-06		107910705	1.47402	0.000451388		107895179	1.30616	8.62672e-192
107957005	1.63071	0.000864314		107959940	1.4743	9.91994e-290		107896203	1.3066	6.57261e-09
107936397	1.63073	6.56039e-07		107958843	1.47509	0.00017849		107917035	1.3073	1.56063e-58
107951524	1.63085	0.000131544		107957756	1.4754	4.87353e-227		107932435	1.30733	0.000461078
107897087	1.63214	1.93382e-07		107957816	1.47675	9.37959e-136		107943316	1.30746	2.15462e-09
107894153	1.63247	1.11304e-11		107955337	1.47719	2.1805e-47		107934422	1.30764	3.94016e-18
107905716	1.63292	2.1052e-97		107919817	1.47736	4.82836e-156		107961078	1.30899	5.75472e-08
107935161	1.63471	6.64785e-50		107948807	1.47818	2.94768e-16		107956194	1.309	0
107957765	1.63493	1.50882e-44		107929018	1.47842	7.62947e-15		107922282	1.30918	5.79071e-209
107929715	1.63536	6.17506e-13		107886052	1.47898	1.16499e-47		107951300	1.30922	1.92868e-06
107943585	1.63586	2.76773e-23		107922468	1.481	3.46189e-29		107935214	1.30939	2.12727e-38
107950353	1.63645	4.01486e-23		107937352	1.48116	3.10553e-05		107917642	1.3094	3.52213e-09
107909994	1.63687	1.91989e-175		107920511	1.48125	2.06935e-14		107928373	1.31002	2.07094e-06
107951508	1.63708	4.5149e-21		107957081	1.48127	0.000168697		107909159	1.31023	8.01576e-05
107896083	1.63906	0.000803876		107931856	1.48154	1.65106e-07		107913300	1.31031	0.000186425
107945090	1.63927	1.70898e-05		107944656	1.48161	7.82011e-13		107933813	1.31058	1.36499e-102
107934604	1.64013	1.06377e-34		107921105	1.48215	4.64363e-27		107962411	1.31063	2.20061e-57
107937833	1.64053	4.39334e-05		107957060	1.48232	1.13283e-06		107929785	1.31141	0.000243131
107918457	1.64157	1.06123e-05		107931500	1.48241	4.6981e-68		107906544	1.31142	1.22124e-183
107956887	1.64176	0.000141834		107899409	1.48254	3.11936e-45		107938896	1.31172	5.26754e-13
107903347	1.64223	5.0848e-08		107958223	1.48267	2.5213e-09		107925218	1.31181	0.000238899
107929031	1.64248	6.22303e-06		107913317	1.48352	2.33345e-148		107941815	1.31211	4.40002e-10
107918052	1.64286	1.84786e-09		107955736	1.48426	7.23656e-24		107936861	1.31212	1.88319e-20
107888614	1.64293	4.01145e-08		107900364	1.48512	1.42357e-05		107888580	1.31224	3.80113e-163
107944104	1.64379	5.15477e-70		107915183	1.48597	4.1744e-13		107937743	1.31277	5.45849e-06
107936086	1.64437	8.50401e-36		107961875	1.48707	0.000148507		107942658	1.31315	5.95653e-05
107948322	1.64593	1.21037e-08		107955629	1.48739	0		107957115	1.31381	1.06644e-05
107915705	1.64691	0.000209017		107901918	1.48868	4.49232e-49		107889324	1.31407	3.13386e-10
107941935	1.64695	2.08901e-06		107937628	1.48928	5.69299e-157		107913434	1.31409	0
107897452	1.64799	4.59689e-98		107953956	1.48947	2.75182e-141		107941588	1.3147	1.77783e-09
107905027	1.64927	5.6381e-75		107945178	1.48969	4.46327e-35		107907463	1.31529	6.86378e-69
107955469	1.64954	5.30141e-45		107910438	1.49046	0.00042868		107909096	1.31541	2.32345e-34
107890287	1.65017	0.000337492		107913346	1.4908	1.41323e-06		107959615	1.31545	0
107893186	1.65021	8.67473e-288		107890969	1.49087	1.77277e-18		107950473	1.31653	1.47156e-107
107942873	1.65049	9.40633e-52		107926863	1.49174	3.89351e-05		107924199	1.31732	6.14491e-285
107933698	1.6505	9.74738e-11		107895313	1.49225	2.93962e-39		107914207	1.31761	9.48431e-18
107887184	1.65055	1.83216e-25		107962008	1.49234	1.55815e-78		107946495	1.31778	1.83193e-14
107936222	1.65182	2.10188e-09		107894282	1.49245	1.3806e-78		107946847	1.31812	1.86742e-28
107922512	1.65193	9.16444e-48		107904360	1.49293	7.06521e-53		107943755	1.31868	7.70103e-67
107930500	1.65199	1.16881e-23		107961893	1.49314	9.047e-39		107959772	1.31881	5.5199e-57
107887015	1.65209	1.13704e-83		107953341	1.49463	1.88384e-09		107890943	1.31889	3.40789e-27
107938813	1.65307	3.19757e-71		107916690	1.49466	5.68502e-11		107923078	1.31954	6.94346e-38
107932567	1.65562	0		107945812	1.49527	2.19193e-08		107891349	1.31994	0
107958063	1.65693	0		107891168	1.49533	4.36045e-07		107952237	1.32	9.14947e-07
107913962	1.65803	1.30453e-13		107913589	1.49533	1.03417e-12		107908396	1.32006	3.97424e-10
107944112	1.66018	2.3466e-12		107946409	1.49594	2.9597e-21		107922950	1.32013	2.20515e-08
107894890	1.66027	2.34612e-18		107944205	1.49731	0.000543305		107896969	1.32027	9.65069e-13
107923082	1.6614	2.37055e-30		107894637	1.4975	4.55363e-17		107886910	1.32048	2.57191e-55
107946273	1.6614	0.000202714		107934258	1.49766	9.15723e-52		107955736	1.32088	1.92966e-18
107907803	1.66178	0.000209082		107936209	1.49835	3.13151e-05		107904808	1.32104	1.65798e-14
107952898	1.66323	1.16395e-30		107962411	1.49837	1.9144e-79		107929412	1.32111	1.81017e-16
107895000	1.66353	2.2293e-22		107936100	1.49889	0.000220984		107918693	1.32115	1.42513e-05
107935487	1.66417	7.62395e-06		107947956	1.49949	8.22138e-15		107905085	1.32138	2.70922e-53
107951558	1.66427	4.53848e-11		107905499	1.49988	8.47685e-60		107942536	1.32166	1.09398e-08
107910710	1.66433	1.78029e-17		107917545	1.50085	1.09756e-13		107893449	1.32173	4.95139e-22
107891580	1.66465	4.27858e-07		107961067	1.50149	1.61298e-24		107888852	1.32178	1.30925e-145
107902342	1.66528	1.12757e-17		107940649	1.50187	3.48662e-05		107918792	1.32217	6.16897e-20
107897795	1.66572	2.55114e-05		107944972	1.50279	2.41373e-33		107941802	1.32297	3.62069e-05
107947046	1.6661	1.03701e-112		107889601	1.50312	4.61616e-13		107921399	1.32303	0.000308633
107886262	1.6663	4.21055e-08		107937662	1.50324	0.000805452		107936158	1.32371	2.19683e-08
107913893	1.66699	2.10199e-45		107896960	1.50373	9.50338e-17		107935484	1.32406	4.2131e-37
107920210	1.66711	1.96685e-21		107950142	1.50456	3.95452e-155		107901667	1.32415	1.55615e-12
107928106	1.66737	4.42596e-91		107950873	1.50458	1.16227e-05		107907531	1.32483	1.4836e-12
107945484	1.66847	0.000312461		107900867	1.50547	1.55231e-41		107957212	1.32511	2.38624e-76
107908623	1.67151	8.03789e-09		107945180	1.50552	2.10246e-15		107917005	1.32521	1.00411e-13
107896962	1.67188	4.80784e-05		107906466	1.50571	1.77221e-177		107905982	1.32546	2.07862e-25
107941702	1.67344	0.000832701		107931756	1.50576	0.000105478		107939375	1.32546	8.36569e-07
107916951	1.6736	8.04043e-74		107940712	1.50641	2.40847e-182		107946214	1.32577	2.19908e-29
107929928	1.6736	5.72146e-38		107912330	1.50651	1.85766e-75		107891743	1.32613	4.17879e-08
107907175	1.67618	7.50239e-120		107893615	1.50714	1.1422e-07		107955841	1.32616	4.22899e-11
107935503	1.67714	9.88072e-05		107932227	1.50798	4.52413e-51		107929319	1.32619	6.381e-49
107905640	1.67722	4.07163e-134		107933548	1.50807	3.06854e-30		107954312	1.3265	3.00182e-46
107905643	1.67781	1.46452e-12		107945892	1.50907	0		107900624	1.32711	5.41814e-51
107906850	1.67949	1.05008e-26		107953940	1.50953	0		107895722	1.32714	4.68715e-08
107904361	1.67953	4.02048e-06		107917985	1.51032	9.30539e-95		107944127	1.32735	6.36297e-15
107930450	1.67978	5.45745e-10		107886884	1.51079	2.96278e-16		107893525	1.32756	6.73251e-21
107943854	1.68115	1.15234e-229		107918507	1.51117	0.000579866		107919093	1.32783	2.67312e-42
107890722	1.68124	2.61849e-25		107937204	1.51141	2.42935e-06		107888695	1.32836	2.7895e-17
107904937	1.68251	0.00099117		107904730	1.51188	1.93006e-09		107930777	1.32901	9.69132e-14
107905982	1.68326	6.93262e-45		107928230	1.51189	2.13782e-36		107930875	1.32904	1.30522e-237
107893200	1.68376	1.87089e-06		107899579	1.51342	1.01435e-112		107949200	1.32909	1.56721e-27
107924014	1.68433	4.4296e-37		107962401	1.51342	1.01435e-112		107939976	1.32942	9.45079e-44
107936762	1.68558	3.55929e-12		107906068	1.51354	6.18482e-15		107918013	1.32943	1.34324e-18
107939059	1.68659	2.01146e-10		107959369	1.51356	7.20489e-115		107958976	1.32976	1.55472e-05
107887906	1.68692	5.03965e-09		107915616	1.51364	0.000365276		107894327	1.33002	0
107889424	1.68779	1.52578e-05		107914091	1.51366	1.21256e-31		107891016	1.33024	9.45669e-22
107886132	1.68798	0.000614351		107891447	1.51433	2.33478e-08		107930248	1.33037	4.31868e-23
107909565	1.68821	5.11214e-59		107890856	1.51463	2.02453e-16		107914801	1.33054	3.99544e-224
107925959	1.68822	1.1505e-100		107934375	1.51484	0.000244089		107931794	1.33056	3.16827e-66
107953895	1.68897	3.15511e-33		107913893	1.51552	6.76002e-36		107944482	1.33065	0.000619528
107905155	1.68903	2.09251e-06		107948303	1.51565	1.35092e-12		107953090	1.3311	1.80988e-06
107899391	1.68908	3.32568e-20		107920210	1.51613	3.49506e-17		107920162	1.33172	5.04572e-40
107918825	1.68929	7.46189e-05		107924115	1.51655	2.12504e-10		107908518	1.33185	5.93875e-108
107925861	1.69054	1.48533e-27		107959993	1.5182	5.19362e-212		107888363	1.33201	1.51593e-150
107909086	1.69078	2.10817e-246		107946315	1.51827	1.07149e-17		107960283	1.33273	1.08867e-38
107900484	1.6917	4.42586e-09		107888695	1.51944	2.82767e-23		107902293	1.3332	3.09459e-15
107919950	1.69232	0		107957548	1.51951	0.000237118		107950601	1.33331	0.000383492
107939623	1.69302	1.69328e-11		107919950	1.52013	0		107953935	1.33395	1.06384e-304
107934634	1.69601	2.15171e-07		107889449	1.52105	5.36129e-52		107901219	1.33414	3.49111e-27
107904856	1.69682	6.03244e-106		107963842	1.52185	2.06564e-24		107933873	1.33461	5.01939e-10
107941427	1.69764	2.7727e-39		107916972	1.52245	5.94359e-05		107898385	1.33468	5.2558e-23
107916907	1.69769	0.000707029		107945361	1.52247	0.000431436		107961875	1.33565	0.000492907
107912990	1.70282	3.23561e-151		107914080	1.52347	8.58972e-84		107955526	1.33592	5.24081e-45
107927917	1.70291	8.28956e-148		107914533	1.52365	3.57371e-08		107955126	1.3362	1.10256e-05
107958503	1.70324	3.06477e-80		107904080	1.52407	4.49859e-103		107921456	1.33759	0.000341638
107911908	1.70343	2.08261e-15		107897579	1.52439	1.03002e-06		107917038	1.33806	0.000104157
107932103	1.70371	7.86273e-25		107953346	1.52448	2.91202e-05		107961057	1.33893	2.86196e-07
107909335	1.70386	4.89895e-116		107904352	1.52469	7.21615e-16		107913315	1.33905	1.28149e-46
107886712	1.70413	2.57961e-59		107898008	1.52488	4.32239e-21		107926897	1.33909	2.51341e-150
107896396	1.70438	5.39461e-13		107954095	1.52523	1.69382e-22		107894304	1.3395	3.31419e-12
107956071	1.70499	0.000160029		107947193	1.52531	6.56883e-48		107904145	1.33952	8.0622e-38
107947186	1.705	3.13444e-221		107905392	1.52536	5.72524e-07		107914572	1.33985	3.64214e-06
107915104	1.70606	2.03258e-61		107911601	1.52539	8.02583e-31		107924209	1.33989	0
107932876	1.7061	1.56297e-51		107950502	1.52654	0.000644541		107913705	1.34075	7.97475e-06
107905081	1.70638	1.34551e-25		107920248	1.5267	6.89268e-11		107950654	1.34103	1.11323e-152
107940303	1.70721	1.0623e-167		107931594	1.52688	2.46102e-11		107912099	1.34112	3.2205e-205
107949668	1.70726	1.61091e-46		107904145	1.52733	9.64033e-52		107953900	1.34132	9.58342e-09
107905549	1.7081	2.28163e-08		107888699	1.52762	5.09386e-24		107927358	1.34162	0.000557608
107902545	1.70826	1.36037e-123		107935166	1.52771	3.1057e-38		107938059	1.34264	1.38025e-06
107940537	1.70871	2.79379e-65		107918105	1.52788	3.43523e-21		107959011	1.34307	1.80694e-68
107937887	1.70956	5.81088e-28		107905100	1.53006	5.6142e-15		107886437	1.34328	4.08249e-18
107901678	1.71093	0.000990032		107913785	1.53024	5.54745e-57		107953274	1.34337	2.18801e-12
107930736	1.71111	2.47151e-47		107901962	1.53043	2.49504e-07		107937990	1.34384	3.56529e-06
107915769	1.71129	4.95325e-08		107927047	1.53134	2.1934e-07		107899727	1.34396	0
107950201	1.71129	4.95325e-08		107920311	1.5317	2.23289e-13		107929031	1.34422	0.000201674
107906424	1.71174	7.9178e-25		107891749	1.53217	2.51986e-127		107893474	1.34432	1.99233e-135
107912076	1.71507	2.37193e-28		107962433	1.53223	5.50927e-25		107939142	1.34529	0
107928986	1.7156	2.16e-29		107889645	1.53232	9.31005e-53		107896972	1.34532	7.37765e-05
107951311	1.71566	8.2362e-07		107945894	1.53334	1.5014e-26		107948578	1.34619	3.02418e-222
107941480	1.71946	6.92564e-35		107941194	1.53347	0.000265085		107904580	1.34678	1.41626e-55
107918741	1.71948	4.21129e-09		107913453	1.53351	6.1954e-05		107908938	1.34687	0.000952901
107914136	1.72109	0		107945543	1.53396	8.31766e-88		107954501	1.34688	0.000126217
107887372	1.72142	5.13007e-82		107951280	1.5344	5.6681e-15		107947327	1.34692	2.98619e-59
107939754	1.72156	1.8359e-10		107906303	1.53507	1.16841e-10		107912673	1.34694	0.000557225
107935868	1.72197	1.57442e-07		107943123	1.53508	6.54013e-195		107911096	1.34701	1.7881e-13
107893675	1.72289	5.44101e-05		107948187	1.5352	1.8656e-05		107962332	1.34725	0.000604029
107901454	1.72357	1.08041e-11		107915736	1.53527	2.2749e-13		107914266	1.34764	1.09923e-36
107936302	1.72372	0.000574958		107944233	1.53528	1.31175e-74		107950480	1.34817	5.06637e-15
107953008	1.72399	1.60221e-05		107938048	1.53573	8.50093e-35		107928543	1.34824	0
107889073	1.72423	3.76618e-140		107939719	1.53582	5.3695e-15		107901566	1.34825	2.07716e-27
107938775	1.72426	1.65112e-19		107918724	1.53631	0.000535351		107903133	1.34849	1.59318e-16
107901213	1.72495	2.51619e-24		107946864	1.53649	1.6555e-10		107942740	1.34899	2.24609e-156
107919024	1.72587	3.732e-07		107923203	1.53686	7.90258e-19		107938033	1.34909	4.9062e-08
107915033	1.72647	1.49709e-05		107925542	1.53706	8.82906e-12		107897841	1.3491	0
107906278	1.72746	7.21096e-19		107933459	1.53717	1.24324e-06		107893194	1.34945	1.93453e-93
107904191	1.72866	5.52494e-174		107914745	1.53808	2.8295e-07		107961646	1.3495	6.73795e-19
107953601	1.72922	2.97246e-15		107953869	1.5381	1.15399e-226		107889447	1.34955	2.84255e-07
107945775	1.73081	2.35506e-09		107932843	1.53863	4.31588e-12		107934467	1.34961	0
107950716	1.73119	1.34224e-06		107920546	1.53879	0		107944787	1.35013	1.94776e-285
107958505	1.73252	3.48172e-211		107916982	1.53918	1.45492e-13		107923442	1.35022	0
107924660	1.73356	1.41885e-125		107958333	1.53922	0.00029506		107933304	1.35101	4.87819e-06
107944334	1.73413	0		107894299	1.53947	1.66659e-35		107903356	1.35133	0
107892037	1.7342	8.81609e-81		107934371	1.53972	9.00146e-06		107949229	1.35177	8.98541e-142
107932359	1.73474	9.06846e-14		107920799	1.54014	1.30175e-67		107909204	1.35195	8.95162e-18
107903741	1.7354	0.000629368		107888483	1.54056	1.38911e-19		107904349	1.35203	1.75507e-39
107938360	1.7354	3.43705e-08		107951061	1.54082	3.9988e-58		107886052	1.35226	1.52564e-38
107959731	1.73556	0.000509409		107903524	1.54101	2.39176e-63		107897203	1.35247	0.000393559
107956070	1.73576	9.021e-13		107961885	1.54127	1.15573e-19		107948831	1.3528	6.22427e-14
107927214	1.73732	1.70665e-20		107905805	1.54308	1.14614e-18		107895322	1.35391	1.155e-32
107925519	1.73891	5.32215e-07		107909012	1.5436	0.000141778		107922583	1.35417	2.39287e-77
107959803	1.73902	2.12894e-12		107915718	1.54481	2.38614e-06		107916305	1.35453	2.00863e-28
107913218	1.74007	8.92808e-116		107901920	1.54581	0.000459584		107900774	1.35475	1.37579e-10
107930479	1.74008	3.37019e-21		107903738	1.54605	1.11767e-86		107948801	1.3548	8.25917e-35
107913478	1.74018	1.86512e-66		107913097	1.54862	8.01208e-187		107947057	1.35497	3.1746e-26
107940984	1.74087	1.1363e-05		107904062	1.54873	7.5985e-07		107948086	1.35512	6.89778e-33
107920453	1.74094	1.11366e-113		107911984	1.55014	7.61769e-15		107910307	1.35536	1.04343e-47
107909585	1.74115	5.63273e-78		107908726	1.551	5.00775e-44		107890410	1.35557	0.000164675
107946753	1.74181	2.71112e-118		107886702	1.55116	8.11041e-168		107909940	1.35568	0
107899000	1.74298	5.11746e-274		107909094	1.55188	2.07465e-10		107907459	1.35575	1.91922e-21
107952941	1.743	2.81496e-32		107935588	1.55188	0.000315255		107940154	1.35604	5.28588e-22
107898060	1.74486	6.61415e-09		107925681	1.55217	2.59475e-149		107893341	1.35619	3.34567e-08
107946337	1.74715	0		107912683	1.55219	2.00442e-18		107886094	1.35626	0.000339425
107935351	1.74832	1.41911e-90		107921877	1.5527	0.000763089		107895998	1.35629	0.000668126
107926201	1.74862	0.000384272		107945674	1.55295	1.88232e-237		107914073	1.35638	6.76584e-37
107922343	1.74925	0		107945477	1.5533	9.90358e-42		107914091	1.35664	1.32055e-24
107919079	1.74955	1.79141e-13		107922974	1.55336	1.66502e-133		107897395	1.35713	0
107929738	1.74989	2.3778e-06		107923258	1.55419	0.000168137		107895194	1.3574	7.5551e-14
107906499	1.74991	7.8795e-27		107933851	1.55503	4.26515e-11		107944957	1.35754	2.32412e-17
107946361	1.74992	1.82289e-44		107954837	1.55599	2.51342e-11		107908141	1.35774	4.67003e-06
107909527	1.75332	4.6154e-20		107939906	1.557	9.11059e-55		107935349	1.35814	6.44089e-07
107933378	1.7537	9.73962e-05		107904753	1.55821	2.4185e-22		107947858	1.35839	5.64186e-140
107888409	1.75483	1.95218e-16		107886384	1.55871	4.90173e-06		107937812	1.35839	8.11505e-62
107914174	1.75744	4.24488e-125		107918720	1.56057	1.03846e-67		107931945	1.35858	1.56063e-58
107898787	1.75993	5.84272e-12		107927358	1.56112	7.59412e-05		107911706	1.35874	2.63518e-141
107944185	1.76006	3.87624e-36		107899393	1.5619	4.0099e-10		107922736	1.3589	9.07129e-18
107912108	1.76008	6.07962e-215		107941873	1.56355	0.00030509		107920078	1.35938	2.37726e-12
107936458	1.76078	2.21319e-05		107937391	1.56366	0.000169991		107943006	1.35955	1.36927e-09
107930735	1.76107	2.17157e-24		107908196	1.56388	2.88442e-12		107963534	1.35967	1.39966e-94
107901437	1.76166	1.06984e-06		107946790	1.56392	1.41095e-176		107909547	1.35976	1.00206e-64
107928949	1.76173	1.38373e-17		107911982	1.56441	1.79966e-82		107943523	1.35993	4.40275e-12
107961412	1.76226	4.8491e-05		107906795	1.5671	0		107958998	1.36027	2.26055e-76
107909595	1.7626	4.10457e-86		107933378	1.56805	0.000568961		107946567	1.3603	4.88049e-08
107891496	1.76334	1.28755e-15		107900532	1.56812	0		107952935	1.36056	8.31271e-05
107893194	1.76491	2.60994e-184		107945804	1.56815	0		107941860	1.36076	1.90853e-58
107936593	1.76741	1.55237e-70		107916564	1.56906	3.13177e-22		107934793	1.3608	2.48282e-55
107912999	1.76771	4.12924e-63		107941626	1.56955	5.957e-56		107888756	1.36153	1.65279e-98
107937422	1.76777	8.7145e-108		107930311	1.5696	1.11215e-80		107927815	1.36186	2.72249e-15
107952332	1.76896	1.88653e-06		107949293	1.56985	3.46029e-05		107963828	1.36189	4.41021e-89
107896539	1.76962	8.06636e-24		107930196	1.56986	8.35971e-08		107955264	1.362	1.21713e-22
107891170	1.76972	0.000859351		107958378	1.57213	2.1973e-26		107940451	1.36227	2.66097e-22
107889497	1.76994	1.14864e-08		107933038	1.57234	3.11206e-276		107901403	1.36262	3.61786e-88
107953735	1.77048	6.91231e-09		107897841	1.57308	0		107920455	1.3637	1.66921e-19
107905695	1.77049	6.6247e-11		107939727	1.57414	3.28455e-28		107904718	1.36383	1.49036e-48
107934751	1.77119	1.81486e-06		107940614	1.57482	8.01698e-203		107915994	1.36414	0.000304645
107929765	1.77318	1.75459e-06		107957230	1.57514	7.16748e-70		107948898	1.36439	5.34462e-21
107935091	1.77371	9.57375e-47		107953602	1.57607	1.19144e-17		107933755	1.36455	0.000194925
107927660	1.77443	1.18673e-10		107919403	1.5764	2.44348e-06		107889456	1.36525	7.60598e-153
107947104	1.77465	1.83697e-27		107945938	1.57664	5.13558e-56		107950208	1.36537	0
107886092	1.77502	3.36425e-45		107918031	1.5768	4.338e-14		107948441	1.36541	8.13947e-05
107904113	1.77665	0.000869869		107922969	1.5768	3.71374e-42		107898135	1.36567	5.1885e-232
107959655	1.7789	6.90529e-91		107891023	1.57717	5.1826e-10		107894249	1.36569	4.85368e-13
107954984	1.78164	3.49827e-07		107933591	1.5779	7.47031e-280		107920145	1.36637	1.285e-18
107893317	1.78179	4.97723e-29		107914891	1.57842	0		107904301	1.36652	0.000128807
107958199	1.78268	5.153e-11		107913865	1.57901	1.02565e-236		107917770	1.36652	0.000128807
107923248	1.78322	0.000109521		107922328	1.57959	2.14794e-100		107937523	1.36774	7.95679e-33
107962116	1.78576	0.000188708		107909994	1.57985	1.00326e-159		107912400	1.36786	0.000184158
107948758	1.78601	1.81623e-212		107886080	1.57994	9.42827e-66		107904225	1.36802	4.34581e-06
107942150	1.78711	6.88938e-48		107892230	1.58082	1.42693e-19		107919205	1.36809	2.4055e-05
107899672	1.78712	4.6952e-05		107917040	1.58189	3.76597e-80		107903473	1.36813	1.3027e-32
107899435	1.78719	3.303e-216		107889724	1.58255	3.57992e-12		107926901	1.36827	3.7641e-18
107902745	1.78794	7.9009e-22		107905634	1.58296	1.40383e-13		107910438	1.36833	0.000863873
107886817	1.78802	2.73032e-55		107931347	1.58374	3.38256e-67		107946707	1.36877	8.9007e-244
107946442	1.78936	4.26134e-224		107951777	1.58386	5.45261e-23		107900669	1.36886	3.04998e-06
107944583	1.78985	2.22316e-09		107890849	1.58403	6.97742e-130		107918031	1.36945	1.4662e-10
107907179	1.79013	2.37672e-24		107925428	1.58439	2.42722e-07		107934338	1.36959	1.11312e-77
107914745	1.79028	5.66007e-10		107929509	1.5845	2.80203e-05		107913048	1.36986	1.5517e-06
107901844	1.79143	1.66763e-14		107929124	1.58451	1.10654e-70		107955387	1.36988	0
107934207	1.7916	2.68293e-52		107936438	1.58508	6.94027e-52		107923993	1.37025	3.60322e-300
107886631	1.79188	3.16052e-119		107954120	1.58519	2.6318e-34		107894121	1.37063	2.14301e-98
107904340	1.79354	1.88195e-13		107955390	1.58715	8.95435e-36		107942680	1.37065	7.9365e-06
107891789	1.79408	8.37237e-18		107908877	1.58751	0.000756937		107914358	1.37072	1.01841e-12
107896600	1.7943	0.000367217		107937772	1.58793	6.84218e-137		107924893	1.3709	6.9852e-14
107925067	1.79466	3.14482e-08		107963683	1.58793	6.84218e-137		107951061	1.37093	7.65998e-44
107906504	1.79545	8.55297e-14		107887884	1.58815	4.41913e-12		107896971	1.37133	5.61772e-07
107916325	1.7965	6.19583e-27		107894154	1.5886	1.84899e-09		107906694	1.37134	1.3888e-09
107935166	1.79884	1.41916e-57		107905640	1.58885	1.67373e-116		107914950	1.37135	0.000370998
107896944	1.79958	0.00017177		107925573	1.58887	9.17469e-17		107909796	1.37182	2.63624e-27
107923830	1.8001	0		107928525	1.58948	3.55669e-127		107905574	1.37186	5.98814e-30
107927044	1.80368	4.75122e-32		107918096	1.58974	1.11037e-16		107921554	1.37209	5.28179e-24
107899342	1.80369	2.11702e-38		107905296	1.59008	2.13088e-143		107945134	1.3723	5.34182e-118
107901098	1.80404	4.58492e-05		107914136	1.59028	6.29487e-271		107928206	1.37233	3.23035e-90
107894637	1.805	1.20203e-26		107901917	1.5908	0.000130074		107914666	1.37241	5.7783e-239
107908545	1.80533	1.64332e-60		107935349	1.59124	3.09233e-09		107945895	1.37261	3.36638e-35
107909341	1.80579	4.80204e-07		107887166	1.59301	4.66177e-119		107888467	1.37333	1.57991e-11
107943885	1.80579	1.05723e-184		107946189	1.59308	2.71379e-10		107924646	1.37344	9.13161e-06
107886953	1.80626	1.06408e-09		107946305	1.59313	1.06989e-13		107944583	1.37344	9.13161e-06
107932277	1.80671	4.28088e-19		107953603	1.59326	0		107946910	1.37358	1.47157e-14
107958786	1.80774	9.10327e-291		107892299	1.59355	3.44264e-06		107930721	1.37371	6.58479e-103
107911673	1.80842	3.22649e-26		107953391	1.59435	2.1809e-198		107949129	1.37379	2.06584e-21
107888820	1.8093	1.83996e-05		107929475	1.59464	5.80247e-30		107886659	1.3738	3.60571e-11
107957061	1.8093	0.000240276		107936609	1.59543	1.65142e-19		107936086	1.37407	1.7333e-23
107889735	1.80981	6.88372e-07		107886823	1.59597	0		107932802	1.37413	1.86166e-21
107886702	1.80984	2.47564e-250		107896396	1.5973	2.73545e-11		107961903	1.37418	1.03958e-47
107942668	1.81118	3.78886e-75		107892141	1.5974	1.68387e-15		107898955	1.37427	0
107910379	1.81165	1.48152e-116		107895046	1.59842	0.00042171		107932116	1.37439	1.61594e-28
107943981	1.81216	1.37077e-05		107892194	1.59906	1.41767e-44		107889449	1.37515	7.68844e-41
107889437	1.81224	2.18673e-21		107927395	1.60151	2.21506e-23		107891649	1.37524	4.19679e-52
107958171	1.81266	7.99818e-107		107938978	1.60181	5.54865e-10		107929154	1.37605	1.2226e-05
107930304	1.81385	1.17112e-06		107941957	1.60314	6.56583e-260		107920122	1.37633	3.33889e-167
107914313	1.81415	0		107933593	1.60342	0		107920691	1.37636	1.61976e-17
107953288	1.81447	8.48207e-12		107906889	1.60353	7.33028e-26		107893388	1.37741	6.59899e-07
107959791	1.81539	1.21486e-35		107948595	1.60391	5.83853e-09		107940611	1.37745	4.58911e-11
107915088	1.81564	3.99143e-100		107894304	1.60515	5.17723e-18		107958459	1.37852	8.46468e-21
107959617	1.81679	5.52183e-66		107923060	1.60561	0.000301767		107963043	1.37899	2.06511e-15
107916712	1.81829	2.69221e-57		107948245	1.60587	7.91189e-59		107889358	1.38023	4.86951e-253
107886437	1.81893	5.13548e-37		107887906	1.60603	3.34257e-08		107925267	1.38029	3.76456e-153
107941067	1.82133	5.51233e-43		107948256	1.60618	1.02876e-19		107903332	1.38054	3.71737e-10
107919997	1.82166	9.64767e-212		107916322	1.60633	4.53357e-191		107928842	1.38084	1.89535e-05
107897526	1.82167	1.10923e-27		107910311	1.60652	0		107908449	1.38097	7.43744e-10
107892646	1.82176	2.62163e-217		107935081	1.60685	8.22127e-301		107926290	1.38173	1.21809e-06
107907434	1.82253	5.86279e-129		107886865	1.6069	5.1728e-05		107889649	1.38195	0
107912961	1.82279	8.10719e-49		107922850	1.60754	5.65574e-07		107956563	1.382	0.00068846
107930707	1.82296	3.72248e-07		107902569	1.60932	7.12544e-96		107918605	1.38201	0.000539423
107949171	1.82588	7.23267e-20		107891590	1.6099	1.06376e-46		107903471	1.38213	7.48289e-141
107913025	1.82626	2.20407e-27		107902827	1.61015	0		107937772	1.38223	8.06631e-97
107891168	1.82696	8.48424e-11		107952970	1.61035	3.01223e-14		107963683	1.38223	8.06631e-97
107902222	1.82742	6.67701e-50		107937833	1.61142	5.3467e-05		107899682	1.38237	2.24407e-73
107916993	1.82762	0.000541435		107912690	1.61254	7.24581e-09		107943854	1.38312	1.00091e-139
107906719	1.82819	1.4467e-147		107907869	1.61261	3.50452e-05		107895000	1.38351	7.50842e-15
107953955	1.82983	6.5965e-153		107936049	1.61262	6.0051e-16		107897768	1.38352	0.000691549
107904352	1.83287	1.39224e-24		107913174	1.61275	5.18277e-25		107954384	1.38359	8.9489e-154
107901793	1.83546	1.65178e-119		107955262	1.61332	1.39078e-11		107937707	1.38364	3.65374e-13
107906052	1.83573	4.81765e-14		107943210	1.61332	3.13682e-84		107930107	1.38395	8.4069e-190
107890079	1.83615	8.48016e-11		107924991	1.61342	0.000221236		107896381	1.38414	1.00341e-06
107950469	1.83811	6.74587e-18		107895961	1.61385	9.27598e-09		107901182	1.38494	9.82964e-33
107944980	1.83816	1.70974e-44		107901931	1.61385	4.16958e-05		107944509	1.38508	2.27909e-35
107941603	1.83954	7.55876e-06		107946849	1.61468	8.82807e-129		107913233	1.38556	0.000581093
107960305	1.84069	1.05545e-221		107890413	1.61485	1.67503e-07		107943403	1.38643	2.80445e-42
107929716	1.84216	7.19265e-05		107918693	1.61525	6.77079e-08		107932515	1.38682	9.94364e-10
107938656	1.84256	9.1986e-16		107959791	1.61629	9.3853e-27		107915489	1.38707	0.000118147
107958830	1.84313	0.00071515		107929091	1.61648	2.76648e-16		107891932	1.38714	1.33854e-114
107944599	1.84643	9.95546e-10		107963640	1.61706	5.47532e-36		107946664	1.38741	6.0394e-16
107918220	1.84679	2.97877e-76		107962107	1.61769	3.63815e-110		107910216	1.38741	2.54299e-161
107954943	1.84682	5.52781e-50		107938472	1.61803	9.38846e-08		107903449	1.38764	2.52369e-60
107907251	1.84698	6.8275e-180		107919655	1.61807	7.06891e-07		107953731	1.3888	0
107895310	1.84748	2.12805e-12		107919004	1.61818	3.01463e-07		107933480	1.38893	2.95571e-111
107952874	1.8486	3.29697e-60		107895356	1.6187	1.09459e-29		107938312	1.38899	0.000553652
107935356	1.84926	1.29657e-16		107915538	1.6189	2.48579e-05		107948193	1.39006	3.37261e-39
107958262	1.84946	3.44996e-20		107926325	1.61941	0		107916264	1.39014	0
107940083	1.85176	5.60405e-10		107898054	1.6203	1.1177e-15		107896776	1.3903	2.77674e-35
107949704	1.85206	0.000268127		107932550	1.62045	2.56293e-08		107907052	1.39047	5.65923e-83
107906564	1.8524	8.51266e-14		107889768	1.62095	7.65461e-17		107905402	1.3905	2.53e-233
107899409	1.85364	1.58069e-79		107934576	1.62203	4.60582e-08		107922953	1.39062	7.14702e-16
107909094	1.85405	1.43888e-15		107918946	1.62227	3.12116e-06		107951513	1.39093	4.68287e-11
107942939	1.85437	4.10949e-46		107927747	1.62261	2.05114e-34		107932951	1.39176	3.3497e-13
107945034	1.8547	1.49029e-50		107919411	1.62266	4.40654e-37		107927158	1.39212	4.97553e-79
107925509	1.85473	1.74642e-62		107929189	1.62306	4.70624e-94		107922597	1.39323	9.61235e-13
107924065	1.85635	5.44034e-06		107893768	1.62326	3.23627e-33		107942668	1.39351	3.26613e-39
107893373	1.85642	0.000439336		107939047	1.62337	1.27374e-06		107905817	1.39376	0.000168267
107945832	1.85642	0.000439336		107940359	1.62393	7.40847e-24		107899579	1.39385	7.64477e-92
107916342	1.85654	1.9873e-102		107924836	1.62489	9.01448e-06		107962401	1.39385	7.64477e-92
107933747	1.85685	2.58989e-38		107924417	1.62492	0		107893461	1.39393	0.000362319
107908050	1.85738	5.75631e-07		107925717	1.62508	9.63022e-36		107957868	1.394	4.05108e-69
107920661	1.85742	2.63197e-10		107904183	1.62609	2.32967e-88		107896309	1.39413	3.54e-60
107896754	1.8582	1.20472e-07		107904341	1.62609	2.32967e-88		107955463	1.39442	2.0042e-08
107905221	1.85826	1.4999e-10		107940625	1.62738	7.15008e-267		107915720	1.39467	6.92115e-07
107954012	1.85934	1.32361e-47		107957899	1.62866	8.17041e-32		107886999	1.39472	4.8777e-17
107927626	1.85997	8.04266e-125		107948322	1.6289	1.54857e-08		107905132	1.3952	1.02652e-60
107953385	1.86042	3.46781e-05		107888815	1.62962	3.49733e-16		107926236	1.39526	7.37102e-140
107934986	1.86206	6.94442e-276		107943775	1.62983	1.69116e-85		107926253	1.39526	7.37102e-140
107915760	1.86226	5.43003e-48		107892353	1.63032	3.31288e-13		107902519	1.39538	3.10233e-14
107907083	1.86244	5.24732e-07		107921290	1.63052	8.61956e-38		107930225	1.39627	8.83581e-05
107944588	1.86247	7.47079e-50		107917994	1.63128	9.57625e-121		107926358	1.39636	2.55314e-34
107922468	1.86317	1.24114e-51		107955054	1.63361	5.09065e-08		107957816	1.39643	5.84676e-118
107925280	1.86421	1.92067e-80		107954694	1.63391	1.37053e-05		107910174	1.39649	3.63665e-19
107957081	1.86423	7.00586e-07		107905606	1.63488	4.66826e-40		107901640	1.39668	2.16039e-23
107944063	1.86547	2.56884e-55		107955644	1.63542	0.000478959		107958790	1.39756	0
107901604	1.86585	0.000973793		107948711	1.63597	1.02887e-23		107897770	1.39775	3.74609e-24
107925277	1.8668	1.02394e-144		107925959	1.63623	1.04871e-92		107957050	1.39812	1.22734e-189
107937761	1.8672	7.24243e-56		107923560	1.63635	0		107900478	1.3987	7.78202e-131
107915320	1.86756	2.60019e-269		107921814	1.63704	0		107886443	1.39893	5.6928e-94
107912987	1.86796	1.72522e-05		107927017	1.63895	5.0386e-48		107911047	1.39899	3.29644e-48
107918458	1.86824	6.62193e-07		107942198	1.63924	6.75248e-22		107955737	1.39939	1.02422e-74
107900645	1.86832	0.000123914		107946132	1.63925	7.18439e-06		107918990	1.39966	3.108e-06
107904456	1.87019	6.01811e-32		107898929	1.63973	1.30399e-06		107904488	1.39974	2.9469e-10
107887223	1.8715	1.29547e-26		107954744	1.64055	0		107912391	1.39986	7.81751e-16
107905135	1.87225	2.99558e-06		107886650	1.64127	1.28312e-05		107931871	1.40002	2.48974e-95
107943934	1.87249	2.77105e-12		107951311	1.64143	2.61613e-06		107891776	1.4002	7.90919e-69
107891073	1.87253	2.39315e-07		107904411	1.64149	0.000369874		107958417	1.40023	5.97421e-145
107890430	1.87537	1.87827e-05		107909378	1.64149	7.16138e-07		107897153	1.40073	1.53343e-266
107949526	1.87613	1.68556e-46		107950317	1.64247	2.12669e-65		107894021	1.40082	4.66523e-42
107891421	1.87737	1.59908e-70		107888820	1.64248	0.000124007		107951095	1.40107	3.11191e-37
107953472	1.87803	1.04798e-51		107958379	1.6431	0.000550323		107915807	1.40109	0.000442312
107934064	1.87871	0.000269806		107924716	1.64314	0		107941079	1.40139	9.6233e-39
107935349	1.88085	2.16864e-13		107935244	1.64326	0.000240751		107934244	1.40157	1.12824e-113
107941902	1.88089	9.9515e-09		107896788	1.64348	3.65469e-19		107954439	1.40178	8.09563e-28
107941958	1.88092	1.66766e-42		107918787	1.64351	3.85266e-13		107950470	1.40201	1.50428e-243
107953695	1.88223	4.36858e-43		107942122	1.64355	1.04402e-11		107897629	1.40241	9.85574e-05
107943858	1.88275	1.72497e-140		107931620	1.64396	5.88095e-49		107928505	1.40251	5.84703e-05
107949061	1.88296	1.59054e-10		107953735	1.64404	1.16259e-07		107898699	1.40266	2.69257e-24
107897235	1.88299	2.77816e-27		107923252	1.6441	8.6603e-95		107951031	1.40291	0
107951536	1.88487	0		107902012	1.64487	1.12128e-44		107958377	1.40364	5.07733e-285
107901219	1.88717	1.56416e-63		107915994	1.64573	1.36108e-05		107928062	1.40366	1.6655e-07
107914952	1.88731	3.25805e-52		107923030	1.64577	4.70954e-09		107895385	1.40373	0.000669502
107888591	1.88855	9.4141e-06		107944137	1.64792	9.43511e-27		107948187	1.40373	7.19965e-05
107946612	1.88884	3.34574e-114		107930225	1.64818	3.50985e-06		107897200	1.40393	0.000159963
107944843	1.88959	8.66316e-13		107930224	1.6483	2.54808e-05		107909298	1.4042	2.8115e-17
107902988	1.88973	8.63678e-05		107945775	1.64854	1.70712e-08		107948894	1.40507	2.01555e-06
107889698	1.89031	7.49251e-122		107920761	1.64928	1.32983e-41		107909967	1.40508	4.41292e-08
107935557	1.89072	0		107931353	1.64949	1.06363e-50		107943715	1.40526	7.31654e-06
107926263	1.89145	7.47582e-23		107951792	1.6495	1.13013e-10		107962033	1.40546	1.08743e-05
107927127	1.89395	0		107944957	1.65038	4.02962e-27		107912027	1.40552	4.47454e-11
107914384	1.89506	3.28992e-18		107918433	1.65121	3.48256e-13		107946524	1.40555	2.01171e-12
107903165	1.89656	2.8894e-09		107908896	1.6513	4.02979e-13		107900524	1.40563	3.19988e-56
107905953	1.89699	0.000254268		107913025	1.65153	1.91686e-21		107893305	1.4058	1.67685e-101
107959628	1.89725	1.01196e-07		107950774	1.65243	0.000707358		107922750	1.4062	5.96438e-11
107918105	1.89749	4.71313e-36		107935085	1.65313	0		107941228	1.40628	3.11802e-12
107945989	1.89793	5.77029e-38		107920315	1.6534	1.8494e-29		107903746	1.40634	1.08254e-125
107922823	1.89837	6.20955e-12		107927127	1.65462	0		107910567	1.40636	1.7834e-91
107889518	1.90017	0		107889403	1.65504	2.25545e-16		107914394	1.40641	7.05799e-118
107913868	1.90042	1.90771e-09		107889073	1.6553	8.26437e-126		107945025	1.40659	0.000370571
107931637	1.90317	2.05308e-20		107908972	1.65556	3.97582e-15		107921180	1.40659	3.1742e-05
107939927	1.90404	0		107941612	1.65561	5.6293e-58		107911966	1.40679	1.56755e-47
107949149	1.90503	4.78376e-18		107902709	1.65647	0		107959482	1.4081	3.52626e-19
107920555	1.90543	4.90362e-54		107927346	1.65777	6.05852e-06		107945089	1.40819	0.000159391
107938325	1.90638	2.24e-05		107910561	1.65991	1.65435e-05		107945390	1.40827	2.94526e-104
107927844	1.90639	3.02543e-10		107922202	1.65999	2.96184e-21		107910404	1.40871	0
107909309	1.90653	2.21872e-22		107906038	1.66013	0		107912108	1.4089	1.04858e-121
107909812	1.90758	1.84991e-24		107927729	1.66095	1.68272e-129		107890909	1.40896	1.14927e-31
107934630	1.91183	4.69004e-102		107928452	1.66116	2.91942e-05		107903734	1.40912	1.26657e-06
107898699	1.91269	8.57623e-52		107934986	1.66138	2.6191e-204		107953036	1.40917	1.06312e-51
107933983	1.91316	0.000938073		107921249	1.66145	1.76903e-06		107902700	1.40931	4.54925e-07
107941297	1.91325	9.13419e-58		107930303	1.66302	2.30794e-09		107929871	1.40945	7.44569e-05
107905632	1.91372	4.73342e-13		107960283	1.66468	1.89588e-66		107893670	1.40978	2.64161e-07
107889724	1.91477	5.47436e-19		107947176	1.66812	6.92864e-122		107895264	1.41024	2.06672e-21
107928898	1.9149	2.91963e-59		107939980	1.66842	1.53589e-39		107914296	1.41058	3.70108e-17
107958660	1.91511	1.98971e-19		107943939	1.66853	2.03111e-07		107905716	1.41058	1.64476e-67
107910262	1.91538	1.93071e-242		107939932	1.66859	7.26348e-10		107917803	1.4108	2.8733e-91
107900693	1.91541	2.43658e-20		107953546	1.66948	5.97601e-05		107911616	1.41093	1.05073e-11
107912478	1.91588	8.82993e-44		107890435	1.66998	1.26257e-16		107956017	1.41098	0.000503136
107947082	1.91723	2.94489e-32		107939872	1.67022	8.46136e-05		107889648	1.41121	4.08867e-30
107910027	1.91745	5.24416e-36		107949071	1.67057	8.42779e-05		107946932	1.41195	0.000137196
107907326	1.91752	1.03209e-211		107955012	1.67152	2.90832e-65		107962319	1.41281	5.7365e-05
107904914	1.91856	1.91429e-05		107896899	1.67157	2.60164e-33		107918818	1.41285	3.90148e-10
107912432	1.91886	5.8188e-05		107903299	1.6727	0.000210806		107962725	1.41311	6.25037e-08
107956992	1.91942	4.51588e-33		107891788	1.67273	6.02446e-51		107939708	1.41332	1.45861e-06
107895189	1.92049	5.98839e-08		107945648	1.67274	2.13404e-10		107916753	1.41345	2.15875e-68
107898783	1.92054	7.24681e-11		107922843	1.67304	6.52321e-40		107944387	1.41368	7.49564e-07
107943775	1.92079	4.51502e-131		107958786	1.67317	6.05336e-237		107908829	1.4141	1.36494e-14
107946910	1.92127	6.90562e-32		107900483	1.67326	1.88704e-306		107958616	1.41468	3.3004e-11
107936761	1.92137	1.9931e-05		107924409	1.67414	4.60986e-13		107898433	1.41468	7.52534e-08
107905986	1.92151	2.49417e-16		107914394	1.67469	3.88908e-183		107950095	1.4148	1.76135e-24
107916982	1.92182	5.93201e-23		107929873	1.67494	9.20249e-106		107957399	1.415	2.2727e-21
107942672	1.92325	0.000937884		107923595	1.67507	2.48252e-31		107945838	1.41521	7.72697e-26
107887438	1.92334	2.29701e-63		107957688	1.67575	2.77474e-151		107939645	1.4159	8.34615e-67
107896075	1.92368	4.0483e-05		107937889	1.67647	1.33183e-09		107924660	1.41611	2.61036e-75
107947124	1.92444	5.75136e-07		107961876	1.67655	1.02833e-07		107958438	1.41616	4.66741e-71
107937864	1.92531	2.82438e-103		107929388	1.67724	1.28133e-43		107916030	1.41627	0.000460804
107909331	1.92556	1.28736e-107		107917296	1.67744	0.000366127		107928091	1.41657	0.000532625
107891296	1.92654	7.62873e-15		107909204	1.67756	3.24041e-29		107906278	1.41734	2.94731e-12
107963434	1.92716	0.000102764		107917563	1.67763	0.000142058		107891998	1.41782	4.15995e-10
107922776	1.92754	6.96845e-19		107927354	1.67807	3.07317e-07		107958575	1.41914	1.82786e-26
107945180	1.92847	6.46531e-28		107904192	1.67809	3.88678e-43		107886636	1.4192	3.99191e-103
107901015	1.92852	1.71661e-10		107916712	1.67836	1.05549e-46		107890758	1.41933	6.95333e-43
107885984	1.92962	6.59937e-21		107948215	1.67885	2.74166e-70		107949772	1.41966	4.88928e-09
107942337	1.93024	8.52786e-24		107896798	1.67964	8.05959e-19		107899482	1.41995	1.31613e-81
107950788	1.93239	1.30906e-32		107910732	1.68017	1.01146e-37		107891630	1.42	4.84579e-07
107932531	1.93334	8.61081e-08		107924892	1.68093	3.33611e-18		107907953	1.42002	1.07031e-05
107901348	1.93366	1.33946e-08		107934979	1.68115	4.13616e-42		107891230	1.42029	4.69639e-65
107904427	1.93376	2.85697e-114		107914722	1.68148	8.01633e-14		107889646	1.4204	0.000429779
107927725	1.9346	3.01296e-06		107959059	1.68166	5.60839e-28		107944465	1.42052	7.58571e-28
107901845	1.93584	4.98072e-15		107945267	1.68227	3.14252e-120		107900784	1.42101	3.8823e-305
107937170	1.93624	4.90632e-58		107910357	1.68255	2.17424e-13		107897526	1.42122	1.35232e-15
107929577	1.93954	6.79426e-11		107887604	1.68289	6.28905e-186		107919950	1.42182	0
107887604	1.94058	6.32362e-271		107905997	1.68331	3.11274e-07		107913241	1.42208	5.17655e-08
107898147	1.94173	7.37288e-06		107950562	1.68343	0		107927017	1.42209	4.08228e-34
107927388	1.94207	0.000612799		107938889	1.6845	1.39477e-91		107948247	1.4222	1.30448e-47
107918720	1.94226	4.61752e-119		107934468	1.68491	0.000195627		107959552	1.42228	4.7746e-76
107957816	1.94274	4.98127e-276		107946588	1.6851	0		107948816	1.42299	8.14603e-11
107934407	1.94335	4.63339e-114		107906188	1.68576	4.57153e-151		107920248	1.42305	1.34387e-09
107946717	1.94366	2.78205e-05		107935352	1.68683	5.92281e-31		107898624	1.42305	0.000112417
107916972	1.94575	5.48748e-08		107958860	1.68686	1.06615e-52		107933260	1.42314	3.98128e-15
107939504	1.94597	0.000462787		107925650	1.68706	2.5592e-92		107918656	1.42325	3.36818e-07
107932589	1.94704	6.06107e-40		107945578	1.68875	2.29463e-29		107932711	1.42332	2.55211e-277
107946403	1.94787	7.96788e-40		107906469	1.68905	2.40523e-74		107926349	1.42375	9.13213e-23
107932088	1.94862	1.1491e-15		107957854	1.68915	0.000230306		107934918	1.4238	1.46824e-160
107917505	1.95217	7.22198e-07		107936502	1.69115	1.34883e-24		107938313	1.42388	2.65411e-24
107930775	1.95333	4.36115e-08		107904887	1.69172	3.53189e-09		107911977	1.42397	1.58565e-39
107903547	1.9538	1.46493e-33		107915489	1.6928	2.13861e-06		107900590	1.42409	2.27168e-57
107912377	1.95385	1.06818e-294		107920661	1.69338	1.80095e-08		107902458	1.42424	0
107912062	1.95502	4.26347e-30		107887312	1.69348	1.33038e-32		107958762	1.42431	8.01686e-120
107934731	1.95536	4.17515e-52		107890375	1.69356	9.06203e-20		107946033	1.42434	1.3551e-15
107940495	1.95784	1.983e-32		107950473	1.69418	2.72877e-202		107921111	1.42457	6.69864e-14
107932199	1.9585	9.8741e-16		107900478	1.6945	1.59903e-212		107919057	1.42458	1.94758e-38
107908950	1.95865	3.41582e-07		107947743	1.69483	2.33241e-23		107921814	1.42462	0
107926369	1.96191	3.72533e-13		107962841	1.69636	1.41078e-103		107916465	1.4247	0.000819692
107891794	1.96321	2.58371e-22		107936716	1.69693	0.000392808		107912476	1.42503	1.12946e-05
107946716	1.96532	5.4935e-34		107947137	1.69757	0		107944281	1.42536	6.60503e-162
107939164	1.96668	0.000651665		107947211	1.69891	2.84322e-16		107935997	1.42585	5.76471e-34
107939413	1.96694	5.55777e-45		107957666	1.69912	5.05193e-19		107917988	1.42652	3.73974e-99
107962817	1.96735	7.80596e-19		107912108	1.69944	1.57194e-195		107918755	1.42663	3.94328e-26
107910155	1.96956	1.11101e-05		107893486	1.69952	0.000716931		107938221	1.42665	0
107941025	1.97013	1.11346e-08		107951132	1.69973	4.18811e-09		107950202	1.42702	0
107886079	1.97347	3.61987e-42		107911988	1.70053	5.25505e-47		107888599	1.42876	2.83294e-16
107918507	1.97363	2.08975e-06		107937898	1.70075	1.06989e-21		107886818	1.42962	2.25528e-05
107941065	1.97447	1.06697e-21		107937630	1.70092	8.98934e-14		107907186	1.43032	1.55474e-35
107925650	1.9746	1.59149e-139		107944012	1.7013	2.35514e-87		107914313	1.43102	0
107932227	1.97538	5.857e-102		107934616	1.7022	1.02806e-08		107919070	1.43117	6.29757e-07
107928377	1.97559	1.1151e-207		107943830	1.70247	0.000209599		107932955	1.43131	1.32216e-07
107935517	1.97679	9.3554e-07		107955294	1.70273	1.56592e-06		107954705	1.43158	0.000425306
107898154	1.97737	6.13971e-88		107905643	1.70379	4.27799e-13		107891154	1.43199	0
107941666	1.97792	0.000167944		107901070	1.70381	1.00343e-14		107930271	1.4322	2.02626e-05
107920511	1.97809	7.2902e-29		107905080	1.70413	3.09828e-94		107946275	1.43231	5.41106e-68
107944425	1.97882	2.33742e-06		107958356	1.70433	1.44818e-29		107889262	1.43235	4.98941e-80
107944459	1.97993	5.06654e-31		107925279	1.70441	1.17736e-38		107961997	1.43251	8.30036e-126
107960159	1.97993	1.81833e-55		107946940	1.7054	5.8203e-16		107912288	1.43305	1.9349e-08
107959994	1.98017	1.24714e-21		107903681	1.70716	0.000518131		107889113	1.43321	4.56947e-10
107892244	1.98068	3.10522e-06		107932648	1.70775	6.63142e-05		107904348	1.43405	1.76364e-83
107947331	1.98088	2.29513e-177		107909455	1.708	3.91555e-45		107892186	1.43432	6.36404e-47
107948595	1.98252	1.90289e-14		107934445	1.70929	7.05002e-10		107948144	1.43436	5.01923e-98
107907342	1.98274	0.000444727		107905291	1.70981	0.000100726		107901703	1.43438	3.19896e-30
107947064	1.98427	4.92339e-06		107923830	1.70999	0		107904988	1.43475	5.90422e-193
107955479	1.98435	3.138e-05		107929375	1.71128	1.48138e-40		107942066	1.43476	2.87335e-17
107921085	1.98593	5.83513e-160		107918466	1.71211	5.98778e-28		107955573	1.43484	1.25477e-47
107904044	1.98634	1.53573e-27		107888011	1.71242	0.000641886		107927176	1.43499	8.2595e-23
107953557	1.98715	1.11766e-145		107921281	1.71281	3.29999e-102		107925295	1.43531	0
107925421	1.98735	4.67251e-13		107909331	1.71341	2.77602e-79		107911889	1.43549	1.44669e-41
107917002	1.98745	2.04569e-36		107913088	1.71345	1.28176e-35		107933874	1.43596	1.28974e-06
107963748	1.98824	3.93309e-05		107954320	1.71401	0		107891934	1.43666	8.55829e-14
107907625	1.9883	2.67472e-05		107962225	1.71489	3.68566e-32		107936377	1.43682	6.77748e-73
107924409	1.98843	1.19979e-19		107957194	1.71548	2.42449e-32		107948683	1.43695	2.05382e-05
107905401	1.98898	1.24518e-24		107918540	1.71661	0.000218854		107958356	1.43751	6.79724e-20
107914173	1.98904	1.44634e-48		107888993	1.71683	1.99162e-17		107899019	1.43839	5.02833e-157
107898008	1.99206	7.08003e-41		107950513	1.71741	0.000111153		107935218	1.43848	1.68885e-33
107959898	1.99268	0.000185605		107962533	1.71806	5.49159e-278		107948442	1.43857	7.3141e-80
107963717	1.99296	8.83953e-07		107954564	1.71858	6.44472e-10		107958105	1.4387	5.81287e-24
107898054	1.99348	6.52367e-26		107962681	1.72021	4.58456e-40		107896984	1.43906	5.58426e-15
107916817	1.9939	5.10649e-112		107901843	1.72032	0		107911915	1.43914	4.72627e-05
107924318	1.99469	2.83472e-241		107934702	1.72084	8.48192e-08		107925578	1.4394	3.66743e-05
107906136	1.9975	2.42654e-71		107937162	1.72134	3.10843e-14		107951439	1.43963	0
107911267	1.99844	4.34743e-05		107909585	1.72146	1.42073e-75		107896240	1.43984	1.04906e-126
107932870	1.99844	0.000291089		107948941	1.72217	3.87889e-95		107948153	1.44048	0.000872299
107935284	1.99844	1.67869e-05		107950558	1.72246	1.23193e-05		107942150	1.44074	2.30618e-28
107945726	1.99911	1.06811e-14		107943885	1.72271	7.7606e-163		107905910	1.44081	2.11496e-29
107905564	1.99934	2.64587e-06		107888591	1.72304	6.76359e-05		107909705	1.44087	7.00408e-40
107906798	2.00282	3.78033e-06		107946753	1.72345	9.55272e-115		107908432	1.44122	8.73484e-64
107894933	2.00313	0.000304238		107922142	1.72411	3.92514e-74		107949558	1.44173	3.63967e-37
107943715	2.00459	7.80479e-12		107953199	1.72447	6.51662e-13		107932989	1.44175	9.63297e-91
107931067	2.005	2.67784e-185		107961761	1.72581	5.79315e-59		107928260	1.44217	1.14162e-16
107931113	2.00539	7.31864e-11		107908855	1.72658	1.30336e-80		107888469	1.44233	6.54271e-20
107936345	2.00715	2.8862e-08		107918929	1.72691	3.80056e-16		107909499	1.44252	1.16447e-18
107923621	2.00742	2.11824e-10		107931697	1.72709	1.55244e-09		107929091	1.44308	8.12081e-13
107945945	2.00908	1.11541e-29		107907542	1.72739	8.11343e-234		107916920	1.44321	3.14626e-99
107961997	2.01004	6.49252e-303		107927641	1.7277	2.46126e-25		107935992	1.44411	1.16648e-08
107920762	2.01128	3.49918e-08		107914629	1.72774	2.03734e-07		107898987	1.44415	0
107895112	2.01219	2.94867e-21		107929845	1.72835	3.43435e-53		107945477	1.44473	3.79159e-35
107913193	2.01225	2.4238e-72		107938848	1.72864	0.000327859		107918850	1.44481	2.75741e-19
107940468	2.01279	6.85151e-12		107958478	1.72914	6.49298e-24		107946849	1.44483	2.20371e-97
107924913	2.01327	1.6376e-14		107914997	1.72914	1.33034e-12		107899553	1.44568	0.000192693
107909534	2.01382	0		107960542	1.72953	5.89318e-09		107947284	1.44591	1.3246e-114
107891540	2.01398	3.96176e-25		107907502	1.72982	8.54606e-63		107954320	1.4462	0
107915731	2.01413	2.7368e-06		107953695	1.7303	8.16969e-35		107905777	1.44679	0.000229897
107936677	2.01535	1.74445e-187		107953061	1.73073	2.94505e-10		107894299	1.44703	9.53737e-31
107918151	2.01557	0.000932319		107924959	1.7313	0.000615744		107935277	1.44706	9.3963e-07
107886122	2.0159	1.45147e-12		107922667	1.73269	2.35442e-28		107930865	1.44744	2.82723e-118
107908896	2.01602	4.01181e-21		107902175	1.73269	0.000740564		107911995	1.44745	2.03385e-05
107935244	2.01618	2.50429e-06		107908453	1.73302	0		107955038	1.4492	2.06563e-05
107893725	2.01695	0		107912660	1.73399	2.39593e-19		107954080	1.44942	3.59754e-44
107911897	2.01741	5.75444e-09		107960305	1.734	5.21316e-189		107895292	1.44971	7.47353e-11
107946304	2.02061	4.57425e-108		107942337	1.73469	2.36235e-18		107898896	1.44973	7.73256e-251
107947956	2.02168	1.60454e-30		107904521	1.73528	2.7728e-17		107906476	1.4499	2.23742e-19
107893475	2.02397	2.37887e-07		107905694	1.73575	4.73281e-05		107933852	1.44992	1.5656e-60
107909599	2.02473	3.82539e-160		107896984	1.73584	6.72e-23		107951138	1.45012	3.15847e-201
107939394	2.02787	0.000348575		107950868	1.73641	3.3409e-304		107899137	1.45017	2.08671e-267
107950590	2.02794	2.99895e-30		107894281	1.73653	2.45784e-150		107941555	1.45027	1.46719e-08
107947286	2.02818	1.58208e-06		107904856	1.7391	1.64986e-112		107907221	1.45042	1.53898e-66
107893757	2.02951	8.93518e-19		107945090	1.73982	2.91304e-06		107925469	1.45144	6.52538e-54
107958074	2.03009	2.99414e-68		107956701	1.74084	5.88499e-06		107930440	1.45321	0.000472074
107910823	2.03152	5.61893e-06		107887176	1.7421	0		107949915	1.45376	3.64318e-20
107915793	2.03224	1.30633e-51		107935041	1.74219	5.73074e-21		107896573	1.45402	0
107898776	2.0325	6.30967e-46		107912480	1.74224	0.000343924		107950146	1.45536	2.9744e-87
107905816	2.0332	1.41632e-07		107943856	1.74273	1.58057e-82		107923941	1.4554	2.48964e-09
107932643	2.03454	0.000154856		107889497	1.74331	1.81126e-08		107907513	1.45572	1.73104e-09
107897415	2.03499	7.69389e-239		107915862	1.74428	6.5553e-05		107886982	1.45575	1.75329e-172
107949150	2.03829	4.09109e-17		107943403	1.74437	1.82533e-74		107910351	1.45687	1.01438e-97
107960100	2.03883	4.74962e-43		107909595	1.74479	1.08698e-83		107908855	1.45743	7.23955e-53
107896666	2.04008	0.000198647		107918052	1.74628	6.31913e-11		107937950	1.45765	2.43411e-05
107895356	2.04063	1.8052e-53		107903355	1.74642	0		107948204	1.45783	1.02211e-33
107916808	2.04177	9.49955e-15		107909195	1.74735	1.69188e-11		107916861	1.45788	4.34661e-17
107898615	2.04385	9.20525e-123		107889437	1.7476	1.24029e-19		107921141	1.45788	4.34661e-17
107900575	2.04408	1.96341e-28		107898520	1.74854	0.000688506		107922744	1.45794	8.5641e-24
107897809	2.04412	0		107916817	1.74886	2.62741e-79		107945361	1.45833	0.000497888
107943523	2.04575	2.92147e-31		107940693	1.74941	2.71374e-48		107924736	1.45876	5.64465e-105
107954452	2.0466	4.24651e-37		107946921	1.75016	0.000119631		107957750	1.4588	4.02288e-54
107906101	2.04669	5.09477e-13		107948413	1.75034	3.78988e-92		107938472	1.45892	1.56385e-06
107937330	2.04709	0.000173227		107906224	1.75067	1.08642e-06		107922739	1.45897	0
107929124	2.04836	6.53363e-138		107899125	1.75187	2.58399e-49		107919496	1.45899	0.000835826
107925619	2.04906	0.000182504		107907029	1.75203	3.71495e-58		107910278	1.45931	9.75803e-30
107906814	2.05024	2.00512e-06		107943783	1.75331	1.24087e-30		107942497	1.45998	2.0547e-05
107932723	2.05122	1.42738e-06		107931921	1.75359	5.12722e-28		107949171	1.46005	4.26368e-12
107906802	2.05232	0		107937115	1.75373	3.56811e-54		107936224	1.46006	7.59401e-27
107918724	2.05299	8.1722e-07		107930330	1.75396	0.000114043		107894394	1.4601	7.49775e-05
107955038	2.05441	1.28291e-10		107922875	1.75416	6.66901e-25		107934184	1.4606	1.21662e-37
107940693	2.05464	1.7997e-73		107961960	1.75432	3.03714e-16		107914132	1.46087	4.75335e-37
107937707	2.05546	2.08579e-33		107924913	1.75486	1.39992e-10		107929511	1.4609	0.000117207
107962225	2.05578	3.50661e-51		107949616	1.75543	0.000829873		107916897	1.46113	3.39798e-11
107900296	2.05733	2.08395e-09		107945908	1.75616	5.44512e-66		107896902	1.46186	5.22094e-71
107950709	2.05733	0.000475172		107932214	1.75685	2.62659e-34		107953602	1.46199	4.44899e-15
107914303	2.05827	2.30138e-21		107910733	1.75746	4.48099e-14		107912271	1.46214	1.90841e-25
107911902	2.0585	2.03448e-10		107931274	1.75889	1.84564e-06		107934648	1.46293	5.04806e-38
107891180	2.05987	2.28254e-29		107891580	1.75985	4.53664e-08		107912534	1.46312	1.18589e-34
107906068	2.06051	1.25227e-31		107953596	1.76336	2.29678e-22		107948570	1.46345	1.70914e-05
107935687	2.0611	3.23965e-10		107942107	1.76468	1.17165e-06		107918710	1.46461	1.18193e-233
107958333	2.06124	2.13376e-07		107919764	1.76469	8.61715e-08		107911973	1.46511	9.22502e-27
107896513	2.06163	1.38369e-05		107942781	1.76514	9.22342e-67		107907430	1.46598	6.66621e-50
107959501	2.06234	2.64874e-13		107952874	1.76616	1.75661e-53		107891169	1.46619	2.1756e-05
107916177	2.06311	0		107908088	1.76648	2.1321e-29		107954460	1.46635	1.08826e-07
107940433	2.06498	7.73675e-05		107935161	1.7667	1.18424e-60		107956225	1.46678	3.01894e-05
107922620	2.06599	2.19293e-40		107941919	1.76719	5.26867e-16		107925517	1.46803	1.28318e-82
107921593	2.06759	1.70378e-44		107887674	1.76801	1.03726e-06		107887592	1.46821	2.85513e-37
107936716	2.06814	6.68466e-06		107893373	1.76835	0.000777894		107925982	1.46889	2.21413e-24
107887935	2.06832	9.68112e-09		107951046	1.76855	4.39568e-06		107951929	1.46911	6.89264e-07
107935081	2.06945	0		107893831	1.76886	1.67928e-14		107919334	1.46916	0.000338918
107941588	2.06965	1.81385e-26		107948990	1.77022	1.0329e-08		107907175	1.46948	9.49671e-86
107907037	2.07103	9.69775e-181		107909569	1.77056	8.36039e-08		107938273	1.47013	2.58107e-05
107915806	2.0728	1.65567e-07		107897110	1.77126	2.0437e-34		107940157	1.47015	2.63641e-06
107946995	2.07396	3.33014e-34		107915719	1.77187	9.45848e-17		107930311	1.47037	1.3402e-68
107948711	2.07429	3.84051e-43		107906129	1.77385	3.7112e-09		107889601	1.47083	1.12372e-12
107900590	2.07494	8.32671e-151		107946427	1.77414	1.88616e-299		107916331	1.47101	6.93464e-08
107952085	2.07504	2.67436e-138		107887561	1.77527	9.4282e-07		107942366	1.47141	4.48721e-49
107940860	2.07538	0.000175352		107961244	1.77528	0.000734531		107928616	1.4716	4.15421e-45
107922493	2.07618	0		107911530	1.77618	0.000535509		107912160	1.47171	2.87513e-10
107905392	2.07644	9.8263e-14		107893474	1.77658	3.1996e-274		107951336	1.47216	8.95698e-196
107946864	2.07873	2.19536e-21		107947558	1.77758	0.000229353		107930825	1.47219	0.000895693
107909618	2.07879	2.00371e-06		107920795	1.77805	2.37191e-12		107917033	1.47294	2.69223e-106
107951987	2.07934	2.75336e-67		107929722	1.77809	7.04452e-05		107920440	1.47309	5.29683e-25
107911531	2.07945	2.23637e-11		107909187	1.77809	7.46211e-27		107936045	1.47336	0
107890561	2.07951	5.94755e-97		107912758	1.77905	0		107936389	1.47348	3.67131e-08
107957544	2.08002	1.12935e-82		107917000	1.77908	7.60489e-14		107901055	1.47379	2.28347e-05
107926656	2.08246	1.3863e-09		107908623	1.77914	3.2353e-10		107908144	1.47379	8.18281e-07
107914811	2.08259	1.83127e-06		107899435	1.7797	5.46559e-213		107957922	1.47387	7.5897e-160
107893519	2.08455	3.73346e-05		107894305	1.78015	2.00168e-194		107962667	1.4739	3.19511e-28
107886364	2.08543	2.94166e-07		107898515	1.78084	8.10973e-253		107930789	1.47398	1.27018e-11
107905537	2.08787	1.39099e-07		107959594	1.78124	8.02546e-13		107892921	1.47427	3.09683e-25
107929260	2.09034	5.2851e-25		107929403	1.78172	1.16534e-127		107937460	1.47483	3.12209e-148
107962868	2.09096	2.72699e-54		107898664	1.78197	6.44643e-46		107892879	1.47496	7.31884e-05
107924710	2.09097	0		107949590	1.78225	4.75437e-41		107939719	1.47499	6.50987e-14
107888625	2.09124	3.33177e-22		107912961	1.78235	4.56886e-46		107889607	1.47503	3.9336e-23
107888352	2.09367	3.75431e-126		107903180	1.78354	0.000207265		107907861	1.47531	1.9172e-05
107912683	2.09439	9.57477e-39		107895000	1.78406	1.28807e-26		107893538	1.47574	3.34127e-09
[truncated: 4,239 more rows]

## Sheet: Data S4
Data S4 All down-regulated differentially expressed genes in coton leaves induced by A. lucorum for 4, 12 and 24 h
CK-VS-4H				CK-VS-12H				CK-VS-24H
Gene ID	log2(Pest_4H/CK)	ajusted p-value(CK-vs-Pest_4H)		Gene ID	log2(Pest_12H/CK)	ajusted p-value(CK-vs-Pest_12H)		Gene ID	log2(Pest_24H/CK)	ajusted p-value(CK-vs-Pest_24H)
107922461	-10.2437	3.6077e-96		107931904	-11.2944	1.53425e-168		107926337	-12.468	0
107928070	-9.40428	5.07297e-61		107915051	-9.51812	1.70251e-65		107931904	-11.2784	1.86773e-168
107899062	-8.97655	3.37763e-48		107899062	-8.96153	3.0342e-48		107938959	-10.4036	1.82366e-106
107918178	-8.97127	4.68145e-48		107950610	-8.66785	5.45526e-41		107910466	-9.65003	4.1288e-71
107950610	-8.68287	6.28131e-41		107959054	-8.63227	3.48523e-40		107911905	-9.55799	1.17897e-67
107917175	-8.5241	1.90231e-37		107901717	-8.55472	1.7565e-38		107912376	-9.41392	1.44908e-62
107922388	-8.43744	1.14744e-35		107922388	-8.42242	9.78682e-36		107900023	-9.16473	1.29438e-54
107917115	-8.13299	3.06795e-08		107924478	-7.92259	5.83596e-27		107899062	-8.94551	2.00473e-48
107924478	-7.93761	7.03393e-27		107935443	-7.76764	1.09143e-24		107950610	-8.65183	3.53583e-41
107962668	-7.73614	5.7914e-24		107960120	-7.54236	1.02904e-21		107917462	-8.59435	3.68109e-55
107915052	-7.55968	1.17038e-21		107891404	-7.48016	5.89596e-21		107922388	-8.4064	6.22366e-36
107960120	-7.55738	1.2495e-21		107887377	-7.47438	6.91195e-21		107906630	-8.07873	6.28997e-30
107886540	-7.55062	1.51602e-21		107911387	-7.35281	1.07782e-65		107924478	-7.90657	3.56019e-27
107898217	-7.54698	9.16367e-29		107945747	-7.27102	1.35922e-18		107962668	-7.70509	2.88838e-24
107903410	-7.51252	4.41746e-21		107905483	-7.20552	6.59727e-18		107944092	-7.61538	4.52083e-23
107955814	-7.42447	4.84267e-20		107939675	-7.19736	7.99141e-18		107960120	-7.52633	6.08232e-22
107943717	-7.42279	5.06297e-20		107918789	-7.19346	8.75964e-18		107886540	-7.51957	7.37283e-22
107935227	-7.23664	1.1883e-39		107896268	-7.14944	2.43119e-17		107928070	-7.50929	1.47994e-74
107939675	-7.21238	9.75762e-18		107943357	-7.12076	4.66315e-17		107903410	-7.48148	2.14517e-21
107896268	-7.16446	2.97671e-17		107925147	-7.06741	1.52282e-16		107887377	-7.45836	4.06529e-21
107917638	-7.12403	7.43608e-17		107933256	-6.9775	1.03565e-15		107916325	-7.32965	1.22798e-19
107902236	-6.96783	4.19518e-08		107909430	-6.75208	8.37777e-14		107939675	-7.18133	4.67029e-18
107925784	-6.93064	4.48359e-15		107900536	-6.51773	0		107896268	-7.13341	1.41774e-17
107940272	-6.85456	1.99393e-14		107898217	-6.5109	1.32339e-30		107928102	-7.06031	7.28488e-17
107893410	-6.85006	2.17485e-14		107958085	-6.44412	8.28992e-16		107925147	-7.05139	8.85837e-17
107891309	-6.81816	3.98834e-14		107929708	-6.41113	2.39988e-11		107920888	-6.94528	8.3772e-16
107949741	-6.65348	7.67785e-13		107943760	-6.35291	0		107911906	-6.77478	2.37384e-14
107911573	-6.62654	1.21094e-12		107933507	-6.29615	1.26623e-10		107909430	-6.73605	4.85679e-14
107939855	-6.55308	4.07378e-12		107898463	-6.26229	2.02556e-10		107956680	-6.67234	1.5246e-13
107894975	-6.48924	1.11727e-11		107952703	-6.2492	2.42323e-10		107945689	-6.64492	2.45699e-13
107929708	-6.42615	2.93043e-11		107954732	-6.15486	8.4723e-10		107895175	-6.62472	3.47812e-13
107933507	-6.31118	1.54607e-10		107962065	-6.12936	1.17407e-09		107961515	-6.58934	6.33402e-13
107918730	-6.27806	2.44187e-10		107962051	-6.12558	0		107934656	-6.54855	1.2468e-12
107919067	-6.21102	6.03233e-10		107913311	-6.10548	1.5898e-09		107943760	-6.54839	0
107917251	-6.17469	9.70025e-10		107931044	-6.07739	2.25089e-09		107958465	-6.5045	2.62522e-65
107954732	-6.16988	1.0321e-09		107917115	-6.05907	2.81393e-09		107945791	-6.33617	1.89955e-58
107915287	-6.1452	1.41627e-09		107935579	-6.05736	2.87195e-09		107933507	-6.28013	7.3129e-11
107957370	-6.12299	1.87323e-09		107950544	-6.01334	4.86686e-09		107959751	-6.27503	7.85675e-11
107953185	-6.05293	4.43161e-09		107906179	-5.94074	1.13018e-08		107898463	-6.24627	1.1707e-10
107945369	-6.04455	3.97965e-06		107946292	-5.94074	1.13018e-08		107935733	-6.20605	0
107933704	-6.00876	7.49544e-09		107940138	-5.89343	1.91692e-08		107948321	-6.17489	3.06296e-10
107946292	-5.95576	1.37611e-08		107943940	-5.8931	7.59915e-22		107954732	-6.13884	4.9002e-10
107887268	-5.91708	2.1229e-08		107903734	-5.86918	2.49755e-08		107947364	-6.13594	2.20264e-262
107949580	-5.91373	2.20212e-08		107897270	-5.80212	5.0985e-08		107913311	-6.08946	9.16856e-10
107940138	-5.90845	2.33454e-08		107895869	-5.7939	5.55665e-08		107953185	-6.02189	2.10141e-09
107962089	-5.81252	6.53463e-08		107918770	-5.75376	0		107918641	-5.94229	5.36426e-09
107928125	-5.79077	8.18639e-08		107959127	-5.71827	1.19699e-07		107946292	-5.92471	6.55556e-09
107958672	-5.68189	2.41562e-07		107888155	-5.71501	1.23616e-07		107947917	-5.89251	0.0002381
107898463	-5.67324	2.13421e-10		107887913	-5.70363	5.93701e-08		107901962	-5.80492	2.44085e-08
107936160	-5.66791	0.000109521		107941066	-5.70363	5.93701e-08		107889122	-5.74029	4.76973e-08
107895615	-5.62156	4.26251e-07		107895164	-5.66355	0		107886520	-5.69408	7.57655e-08
107933816	-5.53201	9.51633e-07		107931554	-5.61823	3.13829e-07		107929517	-5.50408	4.48717e-07
107927696	-5.46652	2.83844e-09		107917175	-5.60991	2.90078e-44		107933816	-5.50096	4.61293e-07
107957013	-5.46099	1.74699e-06		107929801	-5.5715	4.82145e-07		107908459	-5.46045	6.55906e-07
107936851	-5.45407	6.65048e-15		107944338	-5.5442	6.16078e-07		107902532	-5.45143	7.08452e-07
107909948	-5.42984	2.25906e-06		107933816	-5.51699	7.83217e-07		107956679	-5.4214	9.13641e-07
107948683	-5.41095	2.63685e-06		107944867	-5.51636	7.87452e-07		107913650	-5.36969	1.40067e-06
107960309	-5.40892	2.68029e-06		107948683	-5.39593	2.18388e-06		107959507	-5.35551	6.73974e-49
107913650	-5.40073	2.86104e-06		107913650	-5.38571	2.37431e-06		107893609	-5.33929	1.78788e-06
107893609	-5.37033	3.64946e-06		107935470	-5.37267	9.75886e-47		107957211	-5.33509	1.84777e-06
107903785	-5.27955	7.36639e-06		107911286	-5.37059	2.68246e-06		107921441	-5.29244	2.58634e-06
107958089	-5.26535	8.18441e-06		107893609	-5.35531	3.02844e-06		107953290	-5.27503	2.95887e-06
107918510	-5.22034	1.13667e-05		107932341	-5.31925	4.0247e-06		107928069	-5.19673	2.87875e-11
107919877	-5.15293	1.83026e-05		107921441	-5.30847	4.37427e-06		107918510	-5.1893	5.61905e-06
107948328	-5.13223	5.50934e-23		107931853	-5.27706	2.60606e-128		107929014	-5.17997	3.24997e-10
107903552	-5.12801	1.45723e-09		107909900	-5.25408	6.61247e-06		107891416	-5.17224	2.09496e-09
107928069	-5.07968	6.65671e-11		107934961	-5.21151	9.04231e-06		107900536	-5.15781	0
107944260	-5.00156	4.96851e-05		107918510	-5.20532	9.45999e-06		107894441	-5.13744	7.94721e-14
107928102	-4.99375	6.20109e-17		107954423	-5.19599	1.01203e-05		107918381	-5.10554	3.78413e-05
107948750	-4.98706	5.43755e-05		107894967	-5.1675	4.49919e-18		107959054	-5.08268	1.70817e-47
107908688	-4.93891	7.3008e-05		107919877	-5.13791	1.52426e-05		107918770	-5.0684	0
107914069	-4.93796	7.34096e-05		107895396	-5.02436	5.4414e-152		107960183	-5.06306	2.61142e-17
107901095	-4.92471	7.95747e-05		107894545	-5.00268	3.74952e-05		107927205	-5.01316	1.89079e-05
107908747	-4.86946	0.000110028		107894441	-4.99558	1.6229e-13		107894545	-4.98666	2.245e-05
107925526	-4.86649	0.000111936		107944260	-4.98654	4.15356e-05		107907474	-4.97771	4.95981e-09
107895869	-4.80892	1.07813e-07		107891901	-4.97659	4.42066e-05		107888522	-4.95054	2.82628e-05
107886572	-4.80789	0.00015596		107888397	-4.95186	5.15291e-05		107953000	-4.94688	2.89284e-05
107927670	-4.77928	2.70491e-14		107905573	-4.93707	5.37345e-189		107902322	-4.90409	3.76893e-05
107895613	-4.7395	5.0087e-08		107887748	-4.91254	6.5445e-05		107902877	-4.90409	3.76893e-05
107951664	-4.72224	8.86033e-19		107901095	-4.90969	6.65779e-05		107901095	-4.89367	4.01407e-05
107920193	-4.71746	0.000254381		107936851	-4.84328	1.23573e-14		107911842	-4.85184	6.70693e-08
107960057	-4.702	0.000275713		107936032	-4.78666	0.000135474		107942577	-4.85184	6.70693e-08
107941481	-4.69644	0.000283786		107911842	-4.76317	1.25569e-07		107908747	-4.83841	5.58259e-05
107944456	-4.69198	0.00029044		107942577	-4.76317	1.25569e-07		107951966	-4.83247	5.77919e-05
107921534	-4.61509	0.000429126		107888693	-4.76264	1.26291e-07		107926478	-4.8285	5.91401e-05
107952494	-4.58893	0.000487453		107926153	-4.7542	0.000161913		107943364	-4.8285	5.91401e-05
107901901	-4.58653	0.00049322		107900060	-4.72531	0.000189174		107898488	-4.82252	6.12365e-05
107905291	-4.58171	0.000504661		107936622	-4.70901	2.24448e-07		107945937	-4.7789	7.86538e-05
107895191	-4.54877	0.000590488		107920193	-4.70243	0.000213509		107886572	-4.77684	7.95517e-05
107912050	-4.54753	0.000593826		107936071	-4.65102	0.000278489		107903198	-4.77478	8.04761e-05
107925217	-4.54258	0.000607722		107895521	-4.64304	0.000290083		107936032	-4.77064	8.2348e-05
107941515	-4.54134	0.000611231		107948819	-4.64304	0.000290083		107931853	-4.74646	1.70265e-124
107925104	-4.53138	0.000640351		107891237	-4.59653	0.000365667		107939168	-4.73605	9.97137e-05
107947917	-4.52763	0.00065149		107952494	-4.57391	0.000408488		107888674	-4.72112	0.000108196
107961083	-4.49147	0.000123204		107902647	-4.5715	0.000413163		107920193	-4.68641	0.000130388
107928083	-4.48497	6.43829e-20		107941435	-4.5715	0.000413163		107941515	-4.6623	0.000290939
107939110	-4.47015	4.34609e-11		107958121	-4.54587	4.26446e-249		107940341	-4.64294	0.000163718
107935576	-4.46231	0.000874598		107912050	-4.53251	0.000498327		107963848	-4.63608	2.39011e-54
107889801	-4.46099	0.000879619		107925217	-4.52756	0.000510234		107936071	-4.635	0.000170525
107928071	-4.42701	3.79698e-67		107947466	-4.52508	0.000516208		107895164	-4.61772	0
107908947	-4.4239	8.14541e-18		107936123	-4.51877	6.35444e-10		107946387	-4.58993	0.000214466
107895396	-4.40712	2.05876e-145		107925104	-4.51636	0.000537522		107921534	-4.58405	0.000220748
107909502	-4.32616	7.00644e-05		107937882	-4.45251	0.000719681		107942435	-4.5734	0.000232758
107938395	-4.26642	2.09481e-19		107935576	-4.44728	0.000736645		107950502	-4.56387	0.000243932
107891196	-4.16902	2.26738e-47		107928901	-4.41012	0.000868548		107937662	-4.56267	0.000245342
107922190	-4.15588	9.78925e-132		107923640	-4.3699	5.47301e-06		107950889	-4.56267	0.000245342
107963577	-4.03366	8.94312e-05		107893320	-4.34409	2.48495e-10		107902647	-4.55548	0.00025422
107941954	-4.02542	1.50005e-23		107943074	-4.23447	1.62331e-05		107948547	-4.55367	5.42086e-07
107932721	-4.02304	9.5899e-05		107900430	-4.074	5.21093e-05		107892878	-4.54341	0.000269652
107918918	-3.92881	3.6043e-05		107933201	-4.074	1.44993e-08		107905486	-4.53867	4.56474e-18
107919518	-3.92595	1.27788e-15		107913584	-4.07206	4.1748e-06		107912050	-4.51649	0.000306864
107953251	-3.82072	4.87286e-07		107910898	-4.04052	6.54005e-05		107941714	-4.51525	0.000308647
107912696	-3.78526	1.24109e-22		107956606	-4.0129	2.2027e-14		107925217	-4.51154	0.000314199
107889566	-3.70232	3.15347e-28		107922190	-3.98793	3.58659e-128		107947466	-4.50906	0.000318004
107918381	-3.68021	0.000249894		107899162	-3.96825	4.93477e-145		107925104	-4.50034	0.000331547
107933252	-3.64079	0.000867523		107936877	-3.95094	0.000117335		107917041	-4.49408	0.000341397
107948547	-3.58472	5.69691e-06		107899597	-3.92191	8.48159e-05		107944661	-4.48779	0.00035174
107892478	-3.56304	1.28979e-39		107897325	-3.86108	1.89448e-15		107895396	-4.47229	1.86341e-145
107919329	-3.55505	5.10297e-17		107901023	-3.85889	7.01369e-08		107936967	-4.44949	0.00042013
107915993	-3.50406	8.86371e-08		107927019	-3.83993	1.89326e-13		107943972	-4.4417	0.000435188
107961518	-3.43189	0.000522397		107908303	-3.73094	0		107935576	-4.43126	0.000456377
107927672	-3.42557	3.99384e-11		107891270	-3.68698	0.000537785		107889801	-4.42995	0.000459134
107910194	-3.41075	1.72629e-40		107963381	-3.68698	0.000537785		107923640	-4.35388	3.28554e-06
107942426	-3.37728	0.000807007		107887434	-3.6696	6.66088e-22		107898414	-4.33649	0.000691227
107910466	-3.32529	1.04735e-75		107951667	-3.66552	7.11003e-09		107906973	-4.31909	1.46417e-43
107911387	-3.32393	1.51275e-54		107945689	-3.66094	2.10771e-11		107962051	-4.31876	0
107894545	-3.32171	0.000271651		107906655	-3.65216	0.000644783		107936656	-4.29244	5.46308e-06
107912890	-3.29091	1.27147e-06		107949381	-3.64951	1.31518e-23		107905573	-4.25983	2.10492e-177
107950001	-3.25995	0.000143957		107891955	-3.5715	6.37274e-214		107922190	-4.2472	1.72234e-132
107935302	-3.24315	0.000888755		107927538	-3.5715	0.000962841		107916805	-4.21844	9.78412e-06
107911905	-3.24067	1.44945e-69		107916746	-3.56762	5.32873e-05		107942512	-4.21844	9.78412e-06
107929015	-3.21317	3.15924e-81		107950324	-3.54109	2.22867e-154		107929045	-4.18309	1.28182e-05
107916436	-3.18222	1.40278e-137		107958590	-3.49559	5.7375e-08		107954423	-4.17997	1.3127e-05
107897625	-3.1349	7.63406e-41		107911906	-3.46024	7.02235e-12		107960871	-4.14044	1.76044e-05
107935733	-3.12857	0		107918178	-3.44149	4.98738e-48		107956813	-4.13416	7.14589e-11
107927472	-3.09783	8.46362e-13		107908608	-3.43698	0.000802916		107906570	-4.12918	1.91094e-05
107961150	-3.02381	1.16432e-11		107933252	-3.43674	0.000925369		107928974	-4.12166	9.2535e-09
107923472	-3.02006	3.21273e-07		107917589	-3.42043	1.70711e-32		107958243	-4.09372	6.8232e-205
107900536	-3.01289	0		107925948	-3.40455	1.25115e-05		107948328	-4.09046	2.48279e-21
107931916	-2.9954	6.69727e-104		107943929	-3.35922	4.26807e-09		107910881	-4.06844	0
107930837	-2.98533	1.43127e-05		107959558	-3.35091	8.19405e-201		107917589	-4.06807	1.13492e-36
107955021	-2.98468	3.05415e-06		107906605	-3.32817	2.97107e-08		107914840	-4.06479	2.69408e-16
107920888	-2.96733	1.30981e-11		107953359	-3.29235	2.19837e-17		107905521	-4.06012	4.90874e-62
107953581	-2.9615	1.12362e-197		107929015	-3.28653	1.27103e-82		107898845	-4.04228	2.14469e-07
107918177	-2.93041	2.61618e-26		107905486	-3.28247	1.03562e-14		107941925	-4.0383	0
107901601	-2.92623	0.000850821		107900916	-3.25716	2.27395e-177		107937167	-3.9783	6.74006e-48
107915211	-2.90845	0.000915614		107921216	-3.25134	0.000239546		107944260	-3.97052	5.71321e-05
107956669	-2.90845	0.000915614		107945680	-3.24977	1.41894e-06		107958121	-3.96871	4.29004e-231
107945337	-2.8959	0.000983683		107946749	-3.24472	1.44235e-12		107925801	-3.9139	7.92608e-15
107947969	-2.88421	0.000443763		107945830	-3.22838	2.89222e-195		107897610	-3.90731	0
107918789	-2.85093	6.27943e-13		107921448	-3.2275	1.77989e-85		107895869	-3.90603	2.14625e-07
107928802	-2.82443	1.78471e-278		107918730	-3.20993	3.02856e-08		107887999	-3.89462	7.26112e-08
107918767	-2.78583	7.81321e-30		107911743	-3.17287	0		107897270	-3.89079	2.05834e-07
107904584	-2.7569	0.000845716		107928819	-3.16663	0		107959763	-3.86648	6.87857e-161
107936347	-2.71997	3.1456e-13		107910881	-3.14606	0		107891837	-3.85609	0.000117231
107942232	-2.70892	2.65017e-132		107952712	-3.13773	1.94213e-27		107925750	-3.8285	1.60296e-07
107942233	-2.70892	2.65017e-132		107910329	-3.11566	2.30315e-16		107932436	-3.80936	3.63086e-07
107928974	-2.68704	2.58804e-06		107939240	-3.115	2.02952e-07		107950730	-3.80138	2.19621e-07
107929766	-2.68096	0		107897056	-3.10202	7.17341e-06		107897794	-3.73956	2.86993e-41
107918655	-2.66453	0.000384824		107960309	-3.09523	4.73898e-05		107898217	-3.73612	9.65877e-27
107952708	-2.65714	0.000413988		107949493	-3.04513	2.22479e-09		107961274	-3.7254	5.92606e-23
107912383	-2.65343	1.0358e-46		107933621	-2.99374	2.04383e-05		107949755	-3.7151	3.12443e-52
107920791	-2.65028	4.42587e-14		107937167	-2.99278	2.30715e-38		107907654	-3.71182	9.90046e-22
107898255	-2.62971	0.000109115		107888511	-2.98719	0		107906672	-3.68916	1.27701e-12
107911842	-2.61792	2.70254e-05		107892957	-2.9851	5.32932e-08		107894967	-3.68481	8.31831e-16
107942577	-2.61792	2.70254e-05		107950086	-2.96864	3.74138e-06		107914397	-3.65574	1.34742e-56
107917459	-2.58653	5.42622e-09		107886017	-2.96711	3.34352e-79		107895980	-3.65477	1.08285e-06
107904721	-2.57006	0		107928826	-2.96586	5.32265e-17		107952712	-3.63688	5.62835e-31
107959548	-2.56777	0.000108497		107933095	-2.95617	8.96374e-09		107927696	-3.6308	2.81204e-08
107887428	-2.54938	1.05862e-15		107914069	-2.92294	0.000663441		107900918	-3.62647	5.8908e-11
107944174	-2.53942	6.3141e-20		107916627	-2.91186	6.52133e-13		107909948	-3.60802	7.79737e-06
107907103	-2.53479	0		107887999	-2.90704	2.66693e-06		107928083	-3.58399	7.75245e-18
107932961	-2.51538	3.18108e-12		107907983	-2.88083	1.6408e-05		107902237	-3.58096	4.51898e-05
107959127	-2.50987	5.32147e-05		107953000	-2.87205	0.000625839		107948496	-3.57221	0.00055654
107928101	-2.48018	3.80945e-13		107899169	-2.86101	6.56807e-05		107888329	-3.56173	7.21974e-19
107921677	-2.47558	0.000767882		107918578	-2.86101	6.56807e-05		107891955	-3.55548	2.06125e-212
107935372	-2.446	3.24721e-60		107890343	-2.84319	7.61978e-05		107931412	-3.54341	0.000640651
107947364	-2.43867	6.13556e-151		107906270	-2.83926	9.06248e-20		107893234	-3.52227	5.95703e-14
107913334	-2.40852	0.000262642		107954044	-2.83921	7.79396e-32		107962065	-3.51879	2.26321e-08
107917526	-2.40169	1.40554e-05		107937476	-2.8354	5.49952e-25		107940867	-3.51273	0.000109847
107938959	-2.39378	4.07968e-91		107949623	-2.80124	1.01155e-31		107961174	-3.50408	0.000773731
107886325	-2.38832	1.80543e-08		107963848	-2.79914	7.57251e-38		107916045	-3.49335	4.09517e-22
107937871	-2.38762	3.76934e-11		107915403	-2.7939	8.02094e-07		107945680	-3.49009	4.04618e-07
107943760	-2.38434	2.16048e-236		107924345	-2.78517	0		107908454	-3.4822	6.50838e-13
107887143	-2.38186	2.29333e-32		107892946	-2.76094	0.000286474		107933201	-3.47302	4.69866e-08
107891404	-2.3341	1.12652e-12		107887472	-2.75135	1.01269e-29		107919552	-3.45923	0.000187371
107937593	-2.33134	0.000384007		107917628	-2.73854	2.59041e-12		107938274	-3.4573	0.000189556
107929748	-2.32082	3.31704e-241		107959507	-2.73774	4.1443e-32		107936452	-3.45394	0.000841975
107895741	-2.31735	0.000537685		107942232	-2.7344	3.78452e-133		107905652	-3.4487	0
107926138	-2.30763	1.48951e-22		107942233	-2.7344	3.78452e-133		107900739	-3.44422	1.02623e-36
107918999	-2.30254	5.30709e-12		107921690	-2.72979	1.01938e-09		107918578	-3.42995	9.24429e-06
107930547	-2.29248	2.83801e-05		107928974	-2.72551	1.79388e-06		107926146	-3.42191	3.194e-108
107901280	-2.2706	1.81238e-05		107902322	-2.72477	0.0009946		107911072	-3.41195	0.000260029
107903867	-2.26784	1.09281e-05		107902877	-2.72477	0.0009946		107945596	-3.39815	1.4653e-05
107954044	-2.26677	5.11024e-25		107904783	-2.72351	0.000194543		107932119	-3.38704	4.91354e-07
107933288	-2.25916	6.33256e-07		107936656	-2.72351	0.000194543		107948352	-3.3749	1.65482e-48
107904424	-2.25245	5.39894e-279		107942839	-2.71746	3.64877e-50		107904496	-3.37105	1.5362e-05
107888155	-2.24718	0.000149707		107942606	-2.71085	2.41247e-06		107950770	-3.36201	2.99312e-11
107960913	-2.24495	2.11884e-06		107934933	-2.70311	1.65548e-12		107956606	-3.34926	5.07581e-13
107963416	-2.2386	2.60861e-05		107961889	-2.69592	7.83437e-15		107905320	-3.34837	0
107952047	-2.2236	2.21331e-17		107894623	-2.68698	2.79711e-05		107935372	-3.3401	1.18411e-81
107895164	-2.21526	0		107888008	-2.68603	4.48816e-36		107941954	-3.3393	5.42787e-21
107905118	-2.21024	1.04488e-60		107951664	-2.68531	7.54202e-13		107922459	-3.33367	0
107950770	-2.20909	1.58364e-07		107892478	-2.68046	8.91585e-31		107924597	-3.32325	1.9718e-15
107887460	-2.20792	1.71141e-14		107961515	-2.67179	1.21819e-08		107928071	-3.32145	1.23727e-55
107917181	-2.206	6.39117e-07		107895980	-2.6708	3.26366e-05		107911387	-3.32117	1.67973e-54
107936140	-2.19786	0.00033254		107939855	-2.67016	2.6118e-08		107891104	-3.32086	2.93595e-08
107919888	-2.1837	1.47459e-05		107946494	-2.65597	2.43193e-57		107908303	-3.31503	1.09058e-292
107932410	-2.17329	1.59459e-05		107893619	-2.65174	1.26864e-13		107888511	-3.31352	0
107902513	-2.17174	0.000114417		107925603	-2.64902	9.50395e-06		107945290	-3.30695	3.58333e-54
107934734	-2.17149	0.000178387		107926868	-2.63782	3.30722e-119		107946983	-3.30657	0
107944259	-2.16287	0.000309265		107897049	-2.63738	6.44673e-09		107896854	-3.30167	4.69372e-05
107892957	-2.15212	6.52814e-06		107896711	-2.63596	1.51016e-32		107902909	-3.29244	7.4647e-09
107887999	-2.11831	9.37223e-05		107892819	-2.6304	1.2089e-08		107915061	-3.29208	7.51441e-16
107946596	-2.1181	3.99186e-118		107945290	-2.62636	1.7082e-43		107900433	-3.2702	1.21192e-86
107955842	-2.09849	0.00037879		107933975	-2.60744	0.00010766		107886803	-3.26917	0
107963487	-2.05258	9.25173e-05		107917251	-2.6014	1.39337e-06		107928167	-3.26529	9.23391e-05
107932816	-2.04966	1.87741e-27		107921427	-2.59274	0		107916298	-3.26131	6.67666e-156
107910624	-2.03849	2.33059e-05		107929766	-2.58817	0		107905484	-3.25101	2.5687e-08
107946814	-2.03806	9.61796e-06		107946992	-2.58575	0.000352914		107947212	-3.23937	8.89682e-07
107886520	-2.03806	0.000359015		107950211	-2.58311	2.91294e-07		107959980	-3.23003	1.2063e-40
107893320	-2.03719	1.02381e-05		107930568	-2.5825	1.54868e-05		107904582	-3.22451	1.01221e-06
107935540	-2.03461	1.31301e-59		107961627	-2.57514	7.98472e-15		107888155	-3.21872	2.42706e-06
107921151	-2.03021	4.51758e-16		107926370	-2.56665	4.22165e-08		107888691	-3.21345	2.06176e-228
107945605	-2.02733	1.55154e-05		107952353	-2.5612	1.50873e-05		107914384	-3.20318	6.61645e-10
107918854	-2.01542	2.30341e-31		107956680	-2.55744	1.03745e-08		107888300	-3.20165	2.43186e-66
107909573	-2.01428	6.09064e-05		107945605	-2.55409	5.82882e-07		107902234	-3.17105	0.000216736
107934656	-2.01278	2.35421e-06		107954736	-2.54296	2.0747e-64		107897168	-3.16864	8.37834e-05
107918793	-2.00911	9.89055e-17		107933288	-2.52982	8.47846e-08		107897874	-3.15222	7.77368e-08
107891955	-2.00156	9.96092e-117		107941976	-2.52927	0.000225802		107890908	-3.14858	0
107901962	-1.98197	0.000274007		107953781	-2.52072	1.78212e-05		107958013	-3.1422	0.000173686
107888511	-1.96823	0		107891336	-2.51798	3.34187e-61		107952736	-3.14152	0
107930526	-1.95568	3.1938e-06		107897656	-2.50356	0		107959674	-3.13979	1.6975e-05
107913500	-1.94817	2.24536e-05		107905521	-2.5028	6.41979e-41		107918718	-3.12722	2.39623e-16
107903509	-1.94278	0		107906711	-2.48479	1.07281e-16		107886895	-3.12211	2.31211e-06
107936622	-1.91667	0.000596419		107953304	-2.47125	0.00037405		107886149	-3.11989	2.53737e-18
107890059	-1.9155	1.54178e-09		107886921	-2.4654	0.000167628		107929766	-3.10383	0
107909743	-1.91125	5.52626e-45		107917048	-2.46475	7.7826e-35		107949381	-3.10297	5.14885e-21
107929161	-1.90427	1.08366e-23		107946596	-2.4643	4.33068e-141		107959558	-3.10124	5.5037e-187
107920909	-1.90027	2.79231e-05		107959674	-2.46394	0.000201457		107939240	-3.09898	1.264e-07
107918949	-1.88909	6.38207e-05		107963487	-2.45511	1.14105e-05		107923462	-3.09748	1.60955e-23
107927190	-1.8844	1.56431e-45		107932391	-2.44631	4.93374e-27		107917048	-3.09736	6.68431e-44
107949381	-1.88026	3.12856e-12		107886049	-2.44587	0		107946494	-3.09459	1.24424e-66
107911743	-1.87926	0		107939762	-2.44533	0.000200508		107903512	-3.08437	1.43627e-29
107937119	-1.87208	2.29853e-31		107913470	-2.44473	7.09935e-47		107896698	-3.08295	9.46204e-62
107939114	-1.86127	0.000628491		107943612	-2.40295	0		107945100	-3.08258	6.73413e-98
107905437	-1.84058	4.99788e-10		107907205	-2.40276	4.7709e-80		107961010	-3.07904	2.57185e-13
107959054	-1.83994	6.55633e-20		107886986	-2.40182	0.000442458		107924249	-3.0782	4.80529e-06
107912347	-1.83688	4.34988e-09		107905484	-2.39837	2.65483e-06		107899915	-3.07733	3.19986e-05
107921422	-1.8288	6.80206e-05		107941277	-2.39085	9.74576e-106		107934068	-3.06694	2.38538e-13
107923230	-1.81752	1.3288e-15		107963442	-2.39021	2.05516e-105		107918854	-3.06481	1.1352e-49
107936821	-1.81406	4.46268e-29		107916045	-2.38817	1.76697e-15		107899270	-3.0593	7.3169e-64
107888691	-1.80791	4.0628e-119		107888691	-2.38499	1.26519e-168		107908373	-3.04581	1.55632e-11
107937405	-1.8063	8.35982e-13		107950770	-2.38382	3.32221e-08		107907205	-3.04085	3.34749e-102
107937979	-1.80171	4.84942e-13		107922951	-2.38232	5.70752e-15		107937548	-3.03708	0
107906179	-1.80033	0.000372941		107891416	-2.37864	9.42745e-06		107897379	-3.03639	3.29466e-07
107949623	-1.79885	4.7252e-19		107953251	-2.37541	4.52972e-05		107917251	-3.03596	1.07583e-07
107916627	-1.7962	8.64902e-08		107948260	-2.37517	2.31825e-282		107916718	-3.03349	4.44017e-12
107890602	-1.79334	1.90408e-05		107922459	-2.358	0		107963487	-3.03291	5.94194e-07
107962051	-1.79233	0		107918767	-2.35577	4.8943e-25		107947847	-3.02704	0.000107434
107908185	-1.79006	9.26525e-05		107900965	-2.35126	0		107947848	-3.02704	0.000107434
107946136	-1.78979	1.72085e-23		107938441	-2.34958	2.13103e-33		107953304	-3.02227	5.14588e-05
107905652	-1.78058	0		107958465	-2.34659	1.52284e-36		107907266	-3.01778	1.11706e-44
107904026	-1.7765	6.47162e-09		107948547	-2.34628	0.000177087		107949708	-3.01491	4.98894e-18
107946483	-1.77609	5.82919e-07		107910225	-2.3437	0		107930336	-3.01103	6.80129e-05
107954853	-1.772	4.40992e-09		107927731	-2.34125	4.83604e-05		107898853	-3.00497	9.816e-06
107908794	-1.77181	6.44753e-07		107903047	-2.34049	4.93452e-13		107960309	-2.99936	3.6146e-05
107940979	-1.76153	5.00173e-05		107945100	-2.34002	1.94101e-73		107946837	-2.99319	2.88668e-11
107899241	-1.7601	3.31936e-05		107953396	-2.33973	1.66754e-26		107907879	-2.99237	1.3366e-12
107913470	-1.75997	2.89602e-31		107902933	-2.33934	0.000133239		107948316	-2.98758	1.44994e-36
107951565	-1.75867	0.00089576		107950204	-2.33129	0		107954641	-2.98462	0
107915601	-1.74467	2.19544e-08		107949755	-2.32249	1.47574e-33		107938487	-2.97867	4.56627e-08
107918304	-1.73968	8.65115e-08		107934656	-2.31969	2.09616e-07		107950217	-2.97694	2.55047e-38
107891051	-1.73757	0.00022043		107902909	-2.30847	2.0758e-06		107951453	-2.97401	1.55999e-16
107918770	-1.73636	1.26728e-181		107897217	-2.30425	6.91119e-80		107959669	-2.96915	0
107913101	-1.73485	3.62465e-07		107914434	-2.30093	1.95667e-67		107915518	-2.96268	1.45926e-05
107892703	-1.72359	6.40808e-07		107923306	-2.29985	5.1635e-07		107949291	-2.95824	0.000616309
107949196	-1.72145	4.24075e-06		107946345	-2.29566	1.73033e-08		107949493	-2.95511	2.16498e-09
107888008	-1.72008	3.12384e-21		107948348	-2.29306	7.512e-98		107961889	-2.95422	2.29852e-16
107910126	-1.7179	2.0772e-52		107918728	-2.28968	3.27655e-12		107950324	-2.94694	3.2178e-131
107930568	-1.71514	0.000842073		107919486	-2.28761	0.000567987		107891780	-2.94596	0.000331246
107908373	-1.71428	2.53483e-06		107905955	-2.28426	1.11981e-57		107892506	-2.94299	4.55907e-09
107935567	-1.71306	2.01227e-06		107914058	-2.28235	2.92403e-70		107894206	-2.92838	4.47407e-180
107958243	-1.71293	3.7894e-83		107960183	-2.28	8.89583e-10		107938605	-2.92216	0.000371806
107959462	-1.71257	0.000218471		107924378	-2.26611	0		107917007	-2.92059	0
107916997	-1.70814	8.72664e-26		107935733	-2.26555	0		107947348	-2.91944	2.4332e-105
107912027	-1.70411	4.52491e-06		107908828	-2.26493	8.78794e-16		107918353	-2.91843	6.45114e-07
107934032	-1.70302	3.37119e-05		107896698	-2.26201	1.44703e-44		107903047	-2.90943	2.30077e-16
107901822	-1.70263	0.000934801		107928661	-2.25336	3.10861e-70		107921368	-2.90912	2.36401e-05
107936588	-1.70208	1.97661e-05		107950870	-2.23944	2.48336e-26		107927280	-2.90912	2.36401e-05
107938754	-1.69659	2.1708e-141		107955301	-2.23498	4.0411e-161		107897481	-2.90769	1.1743e-15
107934127	-1.69546	6.47935e-06		107936632	-2.2335	8.05133e-33		107957680	-2.89443	1.43056e-16
107940452	-1.69348	1.4932e-179		107886803	-2.23268	4.27992e-277		107925186	-2.89166	6.98899e-16
107945153	-1.68645	7.11249e-08		107952293	-2.23033	1.64923e-24		107917922	-2.88651	6.47489e-22
107941761	-1.6861	4.79692e-16		107928645	-2.21514	0		107895864	-2.87741	0.000498841
107959507	-1.68589	4.03914e-18		107914861	-2.21512	0.000143013		107908366	-2.87741	0.000498841
[truncated: 4,319 more rows]

## Sheet: Data S5
Data S5 KEGG pathway enrichment analysis of DEGs in transcriptome of cotton induced by A. lucorum for different period of time
[truncated: 137 more rows]

[truncated: 3 more sheets: Data S6, Data S7, Data S8]
